# Supplementary material
Source: HighWire-hosted journal article supplement (https://gut.bmj.com/content/70/12/2283)
Supplement: inline-supplementary-material-2 [file inline-supplementary-material-2.xlsx]

## Sheet: Table S1
Table S1. DESeq2 results for the bacterial taxa associated with the STROOP COLOR WORD TEST (SCWT) adjusting for age, sex and years of education in the IRONMET cohort (n=114)
baseMean	log2FoldChange	lfcSE	stat	pvalue	padj	Kingdom	Phylum	Class	Order	Family	Genus	Species
1624.81	0.184386	0.0246096	7.49246	6.75959e-14	1.75682e-10	k__Bacteria	p__Firmicutes	c__Clostridia	o__Clostridiales	f__Lachnospiraceae	g__Butyrivibrio	s__Butyrivibrio sp. CAG:318
66.5814	0.217876	0.0337518	6.45524	1.0805e-10	1.40412e-07	k__Bacteria	p__Firmicutes	c__Clostridia	o__Clostridiales	f__Clostridiaceae	g__Clostridium	s__Clostridium sp. CAG:306
131.128	-0.0807104	0.0132143	-6.10781	1.01009e-09	8.75078e-07	k__Bacteria	p__Bacteroidetes	c__Bacteroidia	o__Bacteroidales	f__Bacteroidaceae	g__Bacteroides	s__Bacteroides nordii
77.951	0.118241	0.019943	5.92896	3.04862e-09	1.98084e-06	k__Bacteria	p__Firmicutes	c__Clostridia	o__Clostridiales	f__Eubacteriaceae	g__Eubacterium	s__Eubacterium sp. CAG:603
288	-0.074451	0.0127654	-5.83226	5.46809e-09	2.84231e-06	k__Bacteria	p__Bacteroidetes	c__Bacteroidia	o__Bacteroidales	f__Porphyromonadaceae	g__Parabacteroides	s__Parabacteroides sp. D13
270.202	-0.130168	0.0224779	-5.79092	7.00031e-09	3.0323e-06	k__Bacteria	p__Firmicutes	c__Negativicutes	o__Veillonellales	f__Veillonellaceae	g__Veillonella	s__Veillonella sp. CAG:933
6761.81	-0.0873623	0.0162444	-5.37799	7.532e-08	2.79653e-05	k__Bacteria	p__Firmicutes	c__Clostridia	o__Clostridiales	f__Clostridiaceae	g__Clostridium	s__Clostridium sp. CAG:7
155.804	0.0930793	0.0174167	5.34427	9.07811e-08	2.94925e-05	k__Bacteria	p__Bacteroidetes	c__Bacteroidia	o__Bacteroidales	f__Bacteroidales__na	g__Bacteroidales__na	s__Bacteroidales bacterium 55_9
15.2068	0.0972779	0.0187663	5.18366	2.17571e-07	6.28298e-05	k__Bacteria	p__Firmicutes	c__Erysipelotrichia	o__Erysipelotrichales	f__Erysipelotrichaceae	g__Coprobacillus	s__Coprobacillus sp. CAG:698
950.776	-0.104186	0.02032	-5.12727	2.93981e-07	7.30119e-05	k__Bacteria	p__Bacteroidetes	c__Bacteroidia	o__Bacteroidales	f__Bacteroidaceae	g__Bacteroides	s__Bacteroides mediterraneensis
88.0419	-0.104672	0.0204802	-5.11088	3.20664e-07	7.30119e-05	k__Bacteria	p__Firmicutes	c__Clostridia	o__Clostridiales	f__Clostridiaceae	g__Clostridium	s__Clostridium neonatale
95.371	-0.0851227	0.0166861	-5.10142	3.37108e-07	7.30119e-05	k__Bacteria	p__Firmicutes	c__Negativicutes	o__Negativicutes__uc	f__Negativicutes__uc	g__Negativicutes__uc	s__Negativicutes__uc
647.224	-0.101413	0.0199802	-5.07569	3.86095e-07	7.71892e-05	k__Bacteria	p__Bacteroidetes	c__Bacteroidia	o__Bacteroidales	f__Rikenellaceae	g__Alistipes	s__Alistipes onderdonkii
1717.61	-0.0581302	0.0115039	-5.05309	4.3472e-07	7.9318e-05	k__Bacteria	p__Bacteroidetes	c__Bacteroidia	o__Bacteroidales	f__Bacteroidaceae	g__Bacteroides	s__Bacteroides thetaiotaomicron
747.162	0.120864	0.0240162	5.0326	4.8387e-07	7.9318e-05	k__Bacteria	p__Firmicutes	c__Clostridia	o__Clostridiales	f__Lachnospiraceae	g__Roseburia	s__Roseburia sp. CAG:380
62537.9	-0.0470152	0.00936302	-5.02137	5.13032e-07	7.9318e-05	k__Bacteria	p__Bacteroidetes	c__Bacteroidia	o__Bacteroidales	f__Bacteroidales__uc	g__Bacteroidales__uc	s__Bacteroidales__uc
107.912	-0.0496251	0.00988701	-5.01922	5.18817e-07	7.9318e-05	k__Bacteria	p__Bacteroidetes	c__Bacteroidia	o__Bacteroidia__uc	f__Bacteroidia__uc	g__Bacteroidia__uc	s__Bacteroidia__uc
104.815	-0.103969	0.0208778	-4.9799	6.36181e-07	9.18575e-05	k__Bacteria	p__Fusobacteria	c__Fusobacteriia	o__Fusobacteriales	f__Fusobacteriaceae	g__Fusobacterium	s__Fusobacterium__uc
17906.1	-0.0723528	0.0145801	-4.96245	6.96107e-07	9.52202e-05	k__Bacteria	p__Bacteroidetes	c__Bacteroidia	o__Bacteroidales	f__Porphyromonadaceae	g__Parabacteroides	s__Parabacteroides__uc
466.708	-0.0625335	0.0127119	-4.9193	8.68563e-07	0.00011287	k__Bacteria	p__Firmicutes	c__Clostridia	o__Clostridiales	f__Lachnospiraceae	g__Lachnoclostridium	s__Lachnoclostridium__uc
1604.17	-0.0538327	0.0110041	-4.89206	9.97867e-07	0.000123498	k__Bacteria	p__Bacteroidetes	c__Bacteroidia	o__Bacteroidales	f__Porphyromonadaceae	g__Parabacteroides	s__Parabacteroides distasonis
223.345	-0.0550472	0.0113729	-4.84022	1.29694e-06	0.000153216	k__Bacteria	p__Bacteroidetes	c__Bacteroidia	o__Bacteroidales	f__Bacteroidaceae	g__Bacteroides	s__Bacteroides sp. 2_2_4
139.492	-0.108343	0.0226995	-4.77292	1.81571e-06	0.000205175	k__Bacteria	p__Firmicutes	c__Clostridia	o__Clostridiales	f__Ruminococcaceae	g__Ruminococcus	s__Ruminococcus gnavus CAG:126
66.1501	-0.0699212	0.014753	-4.73944	2.14309e-06	0.000232079	k__Bacteria	p__Bacteroidetes	c__Bacteroidia	o__Bacteroidales	f__Bacteroidaceae	g__Bacteroides	s__Bacteroides ovatus CAG:22
1204.63	0.150003	0.0318024	4.71672	2.3968e-06	0.000249171	k__Bacteria	p__Proteobacteria	c__Alphaproteobacteria	o__Rhodospirillales	f__Rhodospirillaceae	g__Azospirillum	s__Azospirillum sp. CAG:239
39.7663	-0.0663021	0.0141819	-4.67512	2.93784e-06	0.000293671	k__Bacteria	p__Bacteroidetes	c__Bacteroidia	o__Bacteroidales	f__Bacteroidaceae	g__Bacteroides	s__Bacteroides sp. 2_1_16
68.5306	0.0698732	0.0150623	4.63896	3.50168e-06	0.000337069	k__Bacteria	p__Firmicutes	c__Clostridia	o__Clostridiales	f__Clostridiaceae	g__Clostridium	s__Clostridium sp. 44_14
1025.28	-0.051578	0.0113342	-4.55067	5.34766e-06	0.000496377	k__Bacteria	p__Firmicutes	c__Clostridia	o__Clostridiales	f__Lachnospiraceae	g__Lachnoclostridium	s__[Clostridium] bolteae
83.2112	-0.0707032	0.0155965	-4.53326	5.80808e-06	0.000520524	k__Bacteria	p__Bacteroidetes	c__Bacteroidia	o__Bacteroidales	f__Porphyromonadaceae	g__Parabacteroides	s__Parabacteroides sp. CAG:2
3438.88	-0.0503708	0.0112065	-4.49478	6.96418e-06	0.000586885	k__Bacteria	p__Bacteroidetes	c__Bacteroidia	o__Bacteroidales	f__Bacteroidaceae	g__Bacteroides	s__Bacteroides fragilis
1011.7	0.116193	0.025857	4.49368	7.00017e-06	0.000586885	k__Bacteria	p__Firmicutes	c__Clostridia	o__Clostridiales	f__Eubacteriaceae	g__Eubacterium	s__Eubacterium sp. CAG:581
6.40423	-0.187748	0.0420976	-4.45981	8.20316e-06	0.00066625	k__Bacteria	p__Fusobacteria	c__Fusobacteriia	o__Fusobacteriales	f__Fusobacteriaceae	g__Fusobacterium	s__Fusobacterium varium
505.987	-0.0668599	0.0152666	-4.37948	1.18964e-05	0.000915337	k__Bacteria	p__Bacteroidetes	c__Bacteroidia	o__Bacteroidales	f__Porphyromonadaceae	g__Parabacteroides	s__Parabacteroides sp. SN4
9613.55	-0.102855	0.0234933	-4.37805	1.19744e-05	0.000915337	k__Bacteria	p__Bacteroidetes	c__Bacteroidia	o__Bacteroidales	f__Bacteroidaceae	g__Bacteroides	s__Bacteroides plebeius
91.3862	-0.0666982	0.0156935	-4.25005	2.13722e-05	0.00158704	k__Bacteria	p__Bacteroidetes	c__Bacteroidia	o__Bacteroidales	f__Bacteroidaceae	g__Bacteroides	s__Bacteroides sp. CAG:633
7542.14	-0.0575818	0.0137543	-4.18646	2.83333e-05	0.00194078	k__Bacteria	p__Bacteroidetes	c__Bacteroidia	o__Bacteroidales	f__Bacteroidaceae	g__Bacteroides	s__Bacteroides vulgatus
1856.85	-0.111421	0.02662	-4.18562	2.84391e-05	0.00194078	k__Bacteria	p__Bacteroidetes	c__Bacteroidia	o__Bacteroidales	f__Bacteroidaceae	g__Bacteroides	s__Bacteroides plebeius CAG:211
2853.57	-0.0686697	0.0164245	-4.18094	2.90313e-05	0.00194078	k__Bacteria	p__Bacteroidetes	c__Bacteroidia	o__Bacteroidales	f__Porphyromonadaceae	g__Parabacteroides	s__Parabacteroides merdae
69.1907	-0.0632024	0.0151194	-4.18022	2.91229e-05	0.00194078	k__Bacteria	p__Firmicutes	c__Clostridia	o__Clostridiales	f__Lachnospiraceae	g__Lachnospiraceae__na	s__Lachnospiraceae bacterium 5_1_57FAA
102.626	-0.048454	0.0116403	-4.1626	3.14643e-05	0.00204439	k__Bacteria	p__Bacteroidetes	c__Bacteroidia	o__Bacteroidales	f__Bacteroidaceae	g__Bacteroides	s__Bacteroides sp. 2_1_33B
78.1337	-0.0627046	0.0151805	-4.1306	3.61825e-05	0.00229362	k__Bacteria	p__Firmicutes	c__Clostridia	o__Clostridiales	f__Lachnospiraceae	g__Coprococcus	s__Coprococcus sp. HPP0048
126.125	-0.0753543	0.0182973	-4.11833	3.81622e-05	0.00234699	k__Bacteria	p__Bacteroidetes	c__Bacteroidia	o__Bacteroidales	f__Bacteroidaceae	g__Bacteroides	s__Bacteroides caccae CAG:21
16.1089	-0.0720473	0.0175113	-4.11433	3.88306e-05	0.00234699	k__Bacteria	p__Bacteroidetes	c__Bacteroidia	o__Bacteroidales	f__Bacteroidaceae	g__Bacteroides	s__Bacteroides sp. 41_26
119.153	-0.0558616	0.0136016	-4.107	4.0083e-05	0.00236763	k__Bacteria	p__Bacteroidetes	c__Bacteroidia	o__Bacteroidales	f__Prevotellaceae	g__Prevotella	s__Prevotella amnii
4.12783	-0.097113	0.0238198	-4.07699	4.56231e-05	0.00263499	k__Bacteria	p__Proteobacteria	c__Gammaproteobacteria	o__Vibrionales	f__Vibrionaceae	g__Vibrio	s__Vibrio cholerae
192.486	-0.0725531	0.0178281	-4.06961	4.70927e-05	0.00266074	k__Bacteria	p__Bacteroidetes	c__Bacteroidia	o__Bacteroidales	f__Bacteroidaceae	g__Bacteroides	s__Bacteroides sp. 43_46
528.515	0.04318	0.010636	4.05981	4.91134e-05	0.00271587	k__Bacteria	p__Firmicutes	c__Clostridia	o__Clostridiales	f__Ruminococcaceae	g__Ruminococcus	s__Ruminococcus flavefaciens
210.578	0.0769807	0.0190572	4.03947	5.35729e-05	0.00287226	k__Bacteria	p__Firmicutes	c__Clostridia	o__Clostridiales	f__Eubacteriaceae	g__Eubacterium	s__Eubacterium sp. CAG:86
172.209	-0.0618193	0.0153252	-4.03382	5.4877e-05	0.00287226	k__Bacteria	p__Bacteroidetes	c__Bacteroidia	o__Bacteroidales	f__Bacteroidaceae	g__Bacteroides	s__Bacteroides sp. HMSC067B03
306.427	-0.053271	0.0132114	-4.0322	5.52569e-05	0.00287226	k__Bacteria	p__Bacteroidetes	c__Bacteroidia	o__Bacteroidales	f__Bacteroidaceae	g__Bacteroides	s__Bacteroides fluxus
1.94851	0.0665261	0.0165455	4.0208	5.8e-05	0.00295573	k__Bacteria	p__Firmicutes	c__Clostridia	o__Clostridiales	f__Clostridiales__na	g__Clostridiales__na	s__Clostridiales bacterium GWC2_40_7
208.868	-0.050037	0.0125529	-3.98607	6.71755e-05	0.00335749	k__Bacteria	p__Firmicutes	c__Clostridia	o__Clostridiales	f__Clostridiaceae	g__Clostridium	s__Clostridium sp. KLE 1755
272.838	0.0996498	0.0250298	3.98125	6.85551e-05	0.00336179	k__Bacteria	p__Firmicutes	c__Clostridia	o__Clostridiales	f__Clostridiaceae	g__Clostridium	s__Clostridium sp. CAG:264
334.23	0.0612879	0.0154604	3.96419	7.36447e-05	0.00354449	k__Bacteria	p__Firmicutes	c__Firmicutes__na	o__Firmicutes__na	f__Firmicutes__na	g__Firmicutes__na	s__Firmicutes bacterium CAG:94
92.7946	0.0645612	0.0164152	3.933	8.38913e-05	0.00386071	k__Bacteria	p__Firmicutes	c__Clostridia	o__Clostridiales	f__Ruminococcaceae	g__Ruminococcus	s__Ruminococcus sp. CAG:624
22.7629	0.10428	0.0265269	3.93112	8.45515e-05	0.00386071	k__Bacteria	p__Firmicutes	c__Firmicutes__na	o__Firmicutes__na	f__Firmicutes__na	g__Firmicutes__na	s__Firmicutes bacterium CAG:822
25.6178	-0.0562106	0.0143129	-3.92728	8.59128e-05	0.00386071	k__Bacteria	p__Bacteroidetes	c__Bacteroidia	o__Bacteroidales	f__Bacteroidaceae	g__Bacteroides	s__Bacteroides sp. HMSC073E02
55.7405	-0.0529402	0.0134825	-3.9266	8.61568e-05	0.00386071	k__Bacteria	p__Bacteroidetes	c__Bacteroidia	o__Bacteroidales	f__Porphyromonadaceae	g__Porphyromonas	s__Porphyromonas sp. 31_2
31.098	-0.0559456	0.0144409	-3.8741	0.00010702	0.00471433	k__Bacteria	p__Bacteroidetes	c__Bacteroidia	o__Bacteroidales	f__Prevotellaceae	g__Prevotella	s__Prevotella pallens
130.924	0.0743814	0.019252	3.86357	0.000111743	0.00484035	k__Bacteria	p__Firmicutes	c__Clostridia	o__Clostridiales	f__Eubacteriaceae	g__Eubacterium	s__Eubacterium sp. 36_13
94.2764	0.10725	0.0279279	3.84025	0.00012291	0.00516307	k__Bacteria	p__Fusobacteria	c__Fusobacteriia	o__Fusobacteriales	f__Fusobacteriaceae	g__Fusobacterium	s__Fusobacterium sp. CAG:439
13.5505	-0.0490229	0.0127733	-3.83793	0.000124076	0.00516307	k__Bacteria	p__Bacteroidetes	c__Bacteroidia	o__Bacteroidales	f__Porphyromonadaceae	g__Porphyromonadaceae__na	s__Porphyromonadaceae bacterium H1
833.425	-0.0852555	0.0222262	-3.83581	0.000125153	0.00516307	k__Bacteria	p__Bacteroidetes	c__Bacteroidia	o__Bacteroidales	f__Rikenellaceae	g__Alistipes	s__Alistipes indistinctus
179.503	-0.0559737	0.0146864	-3.81125	0.000138266	0.0056149	k__Bacteria	p__Bacteroidetes	c__Bacteroidia	o__Bacteroidales	f__Bacteroidaceae	g__Bacteroides	s__Bacteroides sp. 3_1_19
8.04596	-0.0607919	0.015997	-3.80021	0.000144572	0.00578065	k__Bacteria	p__Fusobacteria	c__Fusobacteriia	o__Fusobacteriales	f__Fusobacteriaceae	g__Fusobacterium	s__Fusobacterium sp. HMSC073F01
194.048	0.0664275	0.0175259	3.79025	0.000150498	0.00581665	k__Bacteria	p__Firmicutes	c__Clostridia	o__Clostridiales	f__Eubacteriaceae	g__Eubacterium	s__Eubacterium sp. CAG:786
11.5934	-0.0700181	0.0184783	-3.78921	0.000151128	0.00581665	k__Bacteria	p__Firmicutes	c__Negativicutes	o__Selenomonadales	f__Selenomonadaceae	g__Anaerovibrio	s__Anaerovibrio sp. JC8
140.911	-0.0480726	0.0126925	-3.78747	0.000152186	0.00581665	k__Bacteria	p__Firmicutes	c__Clostridia	o__Clostridiales	f__Lachnospiraceae	g__Lachnospiraceae__na	s__Lachnospiraceae bacterium 6_1_37FAA
93.4898	-0.0541598	0.0143557	-3.77271	0.000161486	0.00608263	k__Bacteria	p__Bacteroidetes	c__Bacteroidia	o__Bacteroidales	f__Bacteroidaceae	g__Bacteroides	s__Bacteroides sp. 1_1_14
218.784	0.0616852	0.0164059	3.75994	0.000169955	0.00621888	k__Bacteria	p__Firmicutes	c__Clostridia	o__Clostridiales	f__Clostridiaceae	g__Clostridium	s__Clostridium sp. CAG:1024
33.9047	-0.047673	0.0126876	-3.75746	0.00017165	0.00621888	k__Bacteria	p__Firmicutes	c__Clostridia	o__Clostridiales	f__Clostridiaceae	g__Clostridium	s__Clostridium bolteae CAG:59
90.0296	-0.0874709	0.0233	-3.75412	0.00017395	0.00621888	k__Bacteria	p__Firmicutes	c__Negativicutes	o__Selenomonadales	f__Selenomonadaceae	g__Selenomonadaceae__uc	s__Selenomonadaceae__uc
80.0128	-0.029472	0.00785276	-3.75308	0.000174674	0.00621888	k__Bacteria	p__Firmicutes	c__Clostridia	o__Clostridiales	f__Lachnospiraceae	g__Lachnoclostridium	s__[Clostridium] citroniae
1326.07	-0.0561192	0.0150023	-3.74072	0.000183496	0.00644468	k__Bacteria	p__Bacteroidetes	c__Bacteroidia	o__Bacteroidales	f__Bacteroidaceae	g__Bacteroides	s__Bacteroides xylanisolvens
8.37061	-0.0434616	0.0116598	-3.72748	0.000193408	0.00670222	k__Bacteria	p__Bacteroidetes	c__Bacteroidia	o__Bacteroidales	f__Bacteroidales__na	g__Candidatus Symbiothrix	s__Candidatus Symbiothrix dinenymphae
9.30051	-0.0707783	0.0190534	-3.71474	0.00020341	0.0069561	k__Bacteria	p__Bacteroidetes	c__Bacteroidia	o__Bacteroidales	f__Porphyromonadaceae	g__Parabacteroides	s__Parabacteroides sp. 2_1_7
225280	-0.0445367	0.012092	-3.68315	0.000230371	0.00777577	k__Bacteria	p__Bacteroidetes	c__Bacteroidia	o__Bacteroidales	f__Bacteroidaceae	g__Bacteroides	s__Bacteroides__uc
1166.25	0.0700107	0.0190558	3.67398	0.000238804	0.00795706	k__Bacteria	p__Firmicutes	c__Clostridia	o__Clostridiales	f__Lachnospiraceae	g__Roseburia	s__Roseburia sp. CAG:471
2495.56	-0.0473002	0.0128909	-3.66928	0.000243237	0.00797305	k__Bacteria	p__Bacteroidetes	c__Bacteroidia	o__Bacteroidales	f__Porphyromonadaceae	g__Porphyromonadaceae__uc	s__Porphyromonadaceae__uc
14.0282	0.104784	0.028575	3.66699	0.000245419	0.00797305	k__Bacteria	p__Tenericutes	c__Mollicutes	o__Mycoplasmatales	f__Mycoplasmataceae	g__Mycoplasma	s__Mycoplasma sp. CAG:776
1074.14	-0.0756081	0.0206437	-3.66252	0.000249746	0.00801347	k__Bacteria	p__Bacteroidetes	c__Bacteroidia	o__Bacteroidales	f__Prevotellaceae	g__Prevotellamassilia	s__Prevotellamassilia timonensis
3.78274	-0.057213	0.0156764	-3.64962	0.000262626	0.00832397	k__Bacteria	p__Proteobacteria	c__Betaproteobacteria	o__Burkholderiales	f__Burkholderiales__na	g__Thiomonas	s__Thiomonas sp. CB2
34.526	0.0936045	0.0257141	3.64021	0.000272419	0.00852963	k__Bacteria	p__Proteobacteria	c__Betaproteobacteria	o__Burkholderiales	f__Sutterellaceae	g__Dakarella	s__Dakarella massiliensis
766.45	0.0527465	0.0145044	3.63657	0.000276288	0.00852963	k__Bacteria	p__Firmicutes	c__Clostridia	o__Clostridiales	f__Lachnospiraceae	g__Coprococcus	s__uncultured Coprococcus sp.
31.4473	0.0919376	0.0252986	3.63409	0.000278961	0.00852963	k__Bacteria	p__Firmicutes	c__Clostridia	o__Clostridiales	f__Clostridiaceae	g__Clostridium	s__Clostridium sp. CAG:417
5.7406	-0.0641755	0.017701	-3.62554	0.00028836	0.00867283	k__Bacteria	p__Bacteroidetes	c__Flavobacteriia	o__Flavobacteriales	f__Flavobacteriaceae	g__Capnocytophaga	s__Capnocytophaga ochracea
89.2636	0.107566	0.0296923	3.62269	0.000291554	0.00867283	k__Bacteria	p__Firmicutes	c__Clostridia	o__Clostridiales	f__Clostridiaceae	g__Clostridium	s__Clostridium sp. CAG:349_48_7
521.373	-0.048515	0.0133988	-3.62083	0.000293655	0.00867283	k__Bacteria	p__Bacteroidetes	c__Bacteroidia	o__Bacteroidales	f__Bacteroidaceae	g__Bacteroides	s__Bacteroides sp. 43_108
2.19112	-0.11683	0.0323034	-3.61664	0.000298453	0.00871549	k__Bacteria	p__Proteobacteria	c__Betaproteobacteria	o__Burkholderiales	f__Burkholderiaceae	g__Burkholderia	s__Burkholderia sp. RPE67
35.5418	-0.0758972	0.021034	-3.60831	0.000308196	0.00882202	k__Bacteria	p__Bacteroidetes	c__Bacteroidia	o__Bacteroidales	f__Bacteroidaceae	g__Bacteroides	s__Bacteroides sp. 2_1_56FAA
25.3367	-0.0283334	0.00785352	-3.60773	0.000308889	0.00882202	k__Bacteria	p__Firmicutes	c__Clostridia	o__Clostridiales	f__Lachnospiraceae	g__Lachnoclostridium	s__[Eubacterium] fissicatena
119.75	-0.0593617	0.0164771	-3.60268	0.000314955	0.00884862	k__Bacteria	p__Bacteroidetes	c__Bacteroidia	o__Bacteroidales	f__Prevotellaceae	g__Prevotella	s__Prevotella melaninogenica
205.578	0.0766063	0.0212718	3.6013	0.00031663	0.00884862	k__Bacteria	p__Firmicutes	c__Clostridia	o__Clostridiales	f__Ruminococcaceae	g__Ruminococcus	s__Ruminococcus sp. CAG:382
3.34725	-0.083414	0.0231874	-3.59738	0.000321441	0.00888751	k__Bacteria	p__Proteobacteria	c__Gammaproteobacteria	o__Pseudomonadales	f__Pseudomonadaceae	g__Pseudomonas	s__Pseudomonas aeruginosa
179.971	-0.0503913	0.0140358	-3.5902	0.000330425	0.00898059	k__Bacteria	p__Bacteroidetes	c__Bacteroidia	o__Bacteroidales	f__Bacteroidaceae	g__Bacteroides	s__Bacteroides sp. 4_3_47FAA
1575.63	-0.0473151	0.0131827	-3.58918	0.000331719	0.00898059	k__Bacteria	p__Bacteroidetes	c__Bacteroidia	o__Bacteroidales	f__Bacteroidaceae	g__Bacteroides	s__Bacteroides caccae
20.0745	0.0687826	0.0191912	3.58407	0.000338275	0.00906368	k__Bacteria	p__Tenericutes	c__Mollicutes	o__Mycoplasmatales	f__Mycoplasmataceae	g__Mycoplasma	s__Mycoplasma sp. CAG:611_25_7
22.9735	-0.0843227	0.0236084	-3.57172	0.000354643	0.00940527	k__Bacteria	p__Firmicutes	c__Negativicutes	o__Selenomonadales	f__Selenomonadaceae	g__Anaerovibrio	s__Anaerovibrio__uc
15.5141	0.0642464	0.0181592	3.53796	0.000403233	0.0105859	k__Bacteria	p__Firmicutes	c__Clostridia	o__Clostridiales	f__Peptostreptococcaceae	g__Filifactor	s__Filifactor alocis
480.6	-0.0734273	0.0209213	-3.50968	0.00044864	0.0116601	k__Bacteria	p__Firmicutes	c__Clostridia	o__Clostridiales	f__Clostridiaceae	g__Clostridium	s__Clostridium sp. CAG:299
577.956	-0.0874202	0.0251564	-3.47506	0.000510734	0.0130327	k__Bacteria	p__Bacteroidetes	c__Bacteroidia	o__Bacteroidales	f__Prevotellaceae	g__Prevotella	s__Prevotella multisaccharivorax
4.2223	0.0749696	0.021576	3.47467	0.00051148	0.0130327	k__Bacteria	p__Spirochaetes	c__Spirochaetia	o__Brachyspirales	f__Brachyspiraceae	g__Brachyspira	s__Brachyspira hampsonii
11.0262	0.0318732	0.00921825	3.45761	0.000544983	0.0137038	k__Bacteria	p__Firmicutes	c__Clostridia	o__Clostridiales	f__Clostridiaceae	g__Lutispora	s__Lutispora thermophila
290.264	-0.0536182	0.0155148	-3.45595	0.000548362	0.0137038	k__Bacteria	p__Bacteroidetes	c__Bacteroidia	o__Bacteroidales	f__Prevotellaceae	g__Prevotella	s__Prevotella bivia
45.0311	-0.0449833	0.0130321	-3.45174	0.00055698	0.0137866	k__Bacteria	p__Firmicutes	c__Negativicutes	o__Selenomonadales	f__Selenomonadaceae	g__Selenomonas	s__Selenomonas__uc
9.76754	-0.0546056	0.0158387	-3.44761	0.000565574	0.0138672	k__Bacteria	p__Bacteroidetes	c__Flavobacteriia	o__Flavobacteriales	f__Flavobacteriaceae	g__Capnocytophaga	s__Capnocytophaga sp. oral taxon 332
4229.06	-0.0484548	0.0140753	-3.44254	0.000576274	0.0139152	k__Bacteria	p__Firmicutes	c__Clostridia	o__Clostridiales	f__Clostridiaceae	g__Clostridium	s__Clostridium sp. CAG:43
14.2168	-0.0561494	0.0163148	-3.44162	0.00057824	0.0139152	k__Bacteria	p__Bacteroidetes	c__Bacteroidia	o__Bacteroidales	f__Bacteroidaceae	g__Bacteroides	s__Bacteroides fragilis CAG:47
20.7373	0.0371902	0.0108497	3.42777	0.000608571	0.0145108	k__Bacteria	p__Firmicutes	c__Clostridia	o__Clostridiales	f__Clostridiales__na	g__Clostridiales__na	s__Clostridiales bacterium GWF2_38_85
25.1126	0.0233597	0.00683142	3.41945	0.00062747	0.0148254	k__Bacteria	p__Firmicutes	c__Clostridia	o__Clostridiales	f__Ruminococcaceae	g__Ruminiclostridium	s__[Clostridium] cellulosi
334.415	-0.0661526	0.0193917	-3.41138	0.000646341	0.0150459	k__Bacteria	p__Bacteroidetes	c__Bacteroidia	o__Bacteroidales	f__Porphyromonadaceae	g__Parabacteroides	s__Parabacteroides sp. merdae-related_45_40
1.57628	-0.0805158	0.023608	-3.41053	0.000648379	0.0150459	k__Bacteria	p__Bacteroidetes	c__Flavobacteriia	o__Flavobacteriales	f__Flavobacteriaceae	g__Elizabethkingia	s__Elizabethkingia__uc
1068.86	-0.0274081	0.0080482	-3.4055	0.00066044	0.0151901	k__Bacteria	p__Bacteroidetes	c__Bacteroidetes__uc	o__Bacteroidetes__uc	f__Bacteroidetes__uc	g__Bacteroidetes__uc	s__Bacteroidetes__uc
464.781	-0.0521487	0.0153571	-3.39574	0.00068444	0.015604	k__Bacteria	p__Bacteroidetes	c__Bacteroidia	o__Bacteroidales	f__Bacteroidaceae	g__Bacteroides	s__Bacteroides sp. 3_1_33FAA
2.57343	0.0957129	0.0282807	3.38439	0.000713364	0.016122	k__Bacteria	p__Spirochaetes	c__Spirochaetia	o__Brachyspirales	f__Brachyspiraceae	g__Brachyspira	s__Brachyspira alvinipulli
24.556	0.0786104	0.023259	3.37978	0.000725447	0.0162538	k__Bacteria	p__Firmicutes	c__Clostridia	o__Clostridiales	f__Clostridiaceae	g__Clostridium	s__Clostridium sp. CAG:921
3.6643	0.0412856	0.0122616	3.36705	0.000759756	0.0168012	k__Bacteria	p__Firmicutes	c__Clostridia	o__Clostridiales	f__Ruminococcaceae	g__Ruminiclostridium	s__[Clostridium] straminisolvens
12.5897	0.0356268	0.0105845	3.36595	0.000762807	0.0168012	k__Bacteria	p__Synergistetes	c__Synergistia	o__Synergistales	f__Synergistaceae	g__Fretibacterium	s__Fretibacterium fastidiosum
28.2141	0.104806	0.0312025	3.3589	0.00078253	0.0169832	k__Bacteria	p__Tenericutes	c__Mollicutes	o__Mycoplasmatales	f__Mycoplasmataceae	g__Mycoplasma	s__Mycoplasma sp. CAG:877
16.6067	0.0823983	0.0245355	3.35833	0.000784143	0.0169832	k__Bacteria	p__Firmicutes	c__Bacilli	o__Bacillales	f__Bacillaceae	g__Bacillus	s__Bacillus sp. CAG:988
4.29154	-0.0518872	0.0154623	-3.35571	0.000791602	0.0170031	k__Bacteria	p__Bacteroidetes	c__Bacteroidia	o__Bacteroidales	f__Bacteroidales__na	g__Bacteroidales__na	s__Bacteroidales bacterium Barb6
324.662	0.0519896	0.0155174	3.3504	0.000806961	0.0170989	k__Bacteria	p__Bacteroidetes	c__Bacteroidia	o__Bacteroidales	f__Rikenellaceae	g__Alistipes	s__Alistipes timonensis
47.0589	-0.050625	0.015127	-3.34666	0.0008179	0.0170989	k__Bacteria	p__Firmicutes	c__Clostridia	o__Clostridiales	f__Eubacteriaceae	g__Eubacterium	s__Eubacterium sp. 3_1_31
60.7646	-0.0698747	0.0209001	-3.34327	0.000827974	0.0170989	k__Bacteria	p__Bacteroidetes	c__Bacteroidia	o__Bacteroidales	f__Rikenellaceae	g__Alistipes	s__Alistipes sp. 56_11
21.3576	-0.038708	0.0115787	-3.34303	0.000828704	0.0170989	k__Bacteria	p__Bacteroidetes	c__Bacteroidia	o__Bacteroidales	f__Porphyromonadaceae	g__Porphyromonas	s__Porphyromonas gingivalis
0.981146	-0.0951482	0.0284624	-3.34294	0.000828958	0.0170989	k__Bacteria	p__Bacteroidetes	c__Sphingobacteriia	o__Sphingobacteriales	f__Sphingobacteriaceae	g__Sphingobacterium	s__Sphingobacterium nematocida
133.454	0.07013	0.0210181	3.33664	0.000847964	0.0172956	k__Bacteria	p__Firmicutes	c__Clostridia	o__Clostridiales	f__Clostridiaceae	g__Clostridium	s__Clostridium sp. CAG:557
803.328	0.0583511	0.0174945	3.33539	0.000851804	0.0172956	k__Bacteria	p__Firmicutes	c__Firmicutes__na	o__Firmicutes__na	f__Firmicutes__na	g__Firmicutes__na	s__Firmicutes bacterium CAG:95
60.8238	-0.0338711	0.0101822	-3.3265	0.000879443	0.0177184	k__Bacteria	p__Firmicutes	c__Negativicutes	o__Selenomonadales	f__Selenomonadaceae	g__Selenomonas	s__Selenomonas ruminantium
2.47266	-0.0599789	0.0180674	-3.31973	0.000901033	0.0180137	k__Bacteria	p__Proteobacteria	c__Gammaproteobacteria	o__Pseudomonadales	f__Pseudomonadales__uc	g__Pseudomonadales__uc	s__Pseudomonadales__uc
104.293	-0.0443342	0.0133745	-3.31484	0.000916952	0.0181921	k__Bacteria	p__Bacteroidetes	c__Bacteroidia	o__Bacteroidales	f__Bacteroidaceae	g__Bacteroides	s__Bacteroides sp. 1_1_30
24.6448	-0.0545445	0.0165296	-3.29981	0.000967488	0.0190492	k__Bacteria	p__Bacteroidetes	c__Bacteroidia	o__Bacteroidales	f__Prevotellaceae	g__Prevotella	s__Prevotella sp. F0091
93.4445	-0.0437772	0.0132872	-3.29468	0.000985323	0.0192546	k__Bacteria	p__Bacteroidetes	c__Bacteroidia	o__Bacteroidales	f__Bacteroidaceae	g__Bacteroides	s__Bacteroides sp. HPS0048
6.25429	-0.0661839	0.0201254	-3.28857	0.00100698	0.0195309	k__Bacteria	p__Bacteroidetes	c__Bacteroidia	o__Bacteroidales	f__Prevotellaceae	g__Prevotella	s__Prevotella sp. khp1
1197.66	0.0674678	0.0205864	3.27729	0.00104807	0.0201773	k__Bacteria	p__Firmicutes	c__Clostridia	o__Clostridiales	f__Eubacteriaceae	g__Eubacterium	s__Eubacterium sp. CAG:156
518.856	-0.068539	0.0209667	-3.26895	0.00107949	0.0206294	k__Bacteria	p__Firmicutes	c__Clostridia	o__Clostridiales	f__Lachnospiraceae	g__Dorea	s__Dorea sp. CAG:317
75.0217	0.0612502	0.0187687	3.26342	0.00110077	0.0208825	k__Bacteria	p__Actinobacteria	c__Actinobacteria	o__Bifidobacteriales	f__Bifidobacteriaceae	g__Bifidobacterium	s__Bifidobacterium dentium
507.537	0.0589574	0.0181271	3.25245	0.00114413	0.0215477	k__Bacteria	p__Firmicutes	c__Clostridia	o__Clostridiales	f__Lachnospiraceae	g__Lachnospiraceae__na	s__Lachnospiraceae bacterium TF01-11
302.922	-0.0443222	0.0136487	-3.24735	0.00116485	0.0216344	k__Bacteria	p__Bacteroidetes	c__Bacteroidia	o__Bacteroidales	f__Bacteroidaceae	g__Bacteroides	s__Bacteroides sp. 3_1_40A
93.7564	-0.0724183	0.0223016	-3.24722	0.00116538	0.0216344	k__Bacteria	p__Bacteroidetes	c__Bacteroidia	o__Bacteroidales	f__Odoribacteraceae	g__Culturomica	s__Culturomica massiliensis
25.9418	0.0268235	0.00828612	3.23715	0.00120729	0.0220244	k__Bacteria	p__Spirochaetes	c__Spirochaetia	o__Spirochaetales	f__Spirochaetaceae	g__Treponema	s__Treponema porcinum
6.80442	-0.0622421	0.0192304	-3.23665	0.00120941	0.0220244	k__Bacteria	p__Bacteroidetes	c__Bacteroidia	o__Bacteroidales	f__Bacteroidaceae	g__Bacteroides	s__Bacteroides sp. D1
74.0639	-0.0584975	0.0180872	-3.23418	0.00121991	0.0220244	k__Bacteria	p__Firmicutes	c__Clostridia	o__Clostridiales	f__Lachnospiraceae	g__Lachnospiraceae__na	s__Lachnospiraceae bacterium CAG:215
2.06536	0.0470155	0.0145374	3.2341	0.00122028	0.0220244	k__Bacteria	p__Firmicutes	c__Clostridia	o__Clostridiales	f__Clostridiaceae	g__Caloramator	s__Caloramator__uc
71.0626	-0.0458132	0.0142145	-3.22299	0.00126858	0.0227382	k__Bacteria	p__Bacteroidetes	c__Bacteroidia	o__Bacteroidales	f__Bacteroidaceae	g__Bacteroides	s__Bacteroides sp. D22
61.6654	-0.0419751	0.0130365	-3.21982	0.00128273	0.0228343	k__Bacteria	p__Bacteroidetes	c__Bacteroidia	o__Bacteroidales	f__Bacteroidaceae	g__Bacteroides	s__Bacteroides sp. 2_1_22
776.06	-0.0662989	0.0206639	-3.20844	0.00133457	0.0235956	k__Bacteria	p__Bacteroidetes	c__Bacteroidia	o__Bacteroidales	f__Rikenellaceae	g__Rikenellaceae__uc	s__Rikenellaceae__uc
5447.38	-0.0959516	0.0300215	-3.19609	0.00139303	0.0242566	k__Bacteria	p__Bacteroidetes	c__Bacteroidia	o__Bacteroidales	f__Prevotellaceae	g__Prevotella	s__Prevotella sp. CAG:279
12.7668	-0.0523064	0.0163802	-3.19326	0.00140677	0.0242566	k__Bacteria	p__Bacteroidetes	c__Bacteroidia	o__Bacteroidales	f__Prevotellaceae	g__Prevotella	s__Prevotella sp. BV3P1
2.66629	0.044879	0.014063	3.19129	0.00141641	0.0242566	k__Bacteria	p__Firmicutes	c__Clostridia	o__Clostridiales	f__Clostridiales__na	g__Clostridiales__na	s__Clostridiales bacterium DRI-13
125.839	-0.045352	0.0142168	-3.19004	0.00142254	0.0242566	k__Bacteria	p__Bacteroidetes	c__Bacteroidia	o__Bacteroidales	f__Bacteroidales__na	g__Bacteroidales__na	s__Bacteroidales bacterium 43_36
3368	0.0860122	0.0269701	3.18916	0.00142684	0.0242566	k__Bacteria	p__Firmicutes	c__Clostridia	o__Clostridiales	f__Eubacteriaceae	g__Eubacterium	s__Eubacterium sp. CAG:251
390.102	0.0654368	0.0205199	3.18894	0.00142796	0.0242566	k__Bacteria	p__Firmicutes	c__Clostridia	o__Clostridiales	f__Clostridiaceae	g__Clostridium	s__Clostridium sp. CAG:230
3.56094	0.0406992	0.0127905	3.182	0.00146263	0.0246137	k__Bacteria	p__Firmicutes	c__Clostridia	o__Clostridiales	f__Clostridiales__na	g__Clostridiales__na	s__Clostridiales bacterium mt11
20.9717	-0.03706	0.0116506	-3.18095	0.00146792	0.0246137	k__Bacteria	p__Bacteroidetes	c__Bacteroidia	o__Bacteroidales	f__Porphyromonadaceae	g__Tannerella	s__Tannerella sp. oral taxon HOT-286
2.28321	0.0481861	0.0151735	3.17568	0.00149483	0.0249043	k__Bacteria	p__Firmicutes	c__Clostridia	o__Clostridiales	f__Peptococcaceae	g__Desulfitibacter	s__Desulfitibacter alkalitolerans
62.1052	0.0204659	0.00644947	3.17328	0.00150729	0.0249519	k__Bacteria	p__Firmicutes	c__Clostridia	o__Clostridiales	f__Clostridiaceae	g__Clostridium	s__Clostridium sp. W14A
18.4029	-0.0638799	0.0201452	-3.17097	0.0015193	0.0249915	k__Bacteria	p__Bacteroidetes	c__Bacteroidia	o__Bacteroidales	f__Prevotellaceae	g__Prevotella	s__Prevotella sp. P6B4
5.51373	0.0320245	0.0101149	3.16608	0.00154508	0.0252557	k__Bacteria	p__Firmicutes	c__Clostridia	o__Clostridiales	f__Clostridiales Family XII. Incertae Sedis	g__Acidaminobacter	s__Acidaminobacter hydrogenoformans
17.2386	0.0418938	0.0132935	3.15146	0.00162454	0.0263887	k__Bacteria	p__Firmicutes	c__Clostridia	o__Clostridiales	f__Clostridiales__na	g__Clostridiales__na	s__Clostridiales bacterium GWF2_36_10
5.04672	-0.140513	0.0446316	-3.14828	0.00164233	0.0265119	k__Bacteria	p__Proteobacteria	c__Gammaproteobacteria	o__Enterobacterales	f__Hafniaceae	g__Hafnia	s__Hafnia alvei
193.75	0.072366	0.0230169	3.14403	0.00166639	0.0266227	k__Bacteria	p__Bacteroidetes	c__Bacteroidia	o__Bacteroidales	f__Prevotellaceae	g__Prevotella	s__Prevotella sp. CAG:755
9.53528	0.0848256	0.0269849	3.14345	0.00166968	0.0266227	k__Bacteria	p__Firmicutes	c__Clostridia	o__Clostridiales	f__Clostridiaceae	g__Clostridium	s__Clostridium sp. CAG:1000
37.9115	-0.0523089	0.0166622	-3.13937	0.0016931	0.0268316	k__Bacteria	p__Firmicutes	c__Clostridia	o__Clostridiales	f__Lachnospiraceae	g__Lachnospiraceae__na	s__Lachnospiraceae bacterium 2_1_58FAA
34.943	0.0234305	0.00748844	3.12889	0.00175469	0.027639	k__Bacteria	p__Firmicutes	c__Clostridia	o__Clostridiales	f__Ruminococcaceae	g__Ruminococcus	s__Ruminococcus sp. HUN007
5.47458	0.0624682	0.0201933	3.09352	0.00197799	0.0309687	k__Bacteria	p__Firmicutes	c__Erysipelotrichia	o__Erysipelotrichales	f__Erysipelotrichaceae	g__Coprobacillus	s__Coprobacillus sp. 28_7
1.75867	-0.0486651	0.0157432	-3.09118	0.00199365	0.0310269	k__Bacteria	p__Firmicutes	c__Negativicutes	o__Selenomonadales	f__Sporomusaceae	g__Pelosinus	s__Pelosinus fermentans
4678.49	-0.075937	0.0246559	-3.07988	0.00207086	0.0318491	k__Bacteria	p__Proteobacteria	c__Betaproteobacteria	o__Burkholderiales	f__Sutterellaceae	g__Sutterella	s__Sutterella__uc
77.7307	0.0229398	0.00745112	3.07871	0.00207897	0.0318491	k__Bacteria	p__Firmicutes	c__Clostridia	o__Clostridiales	f__Ruminococcaceae	g__Ruminiclostridium	s__[Clostridium] methylpentosum
4.81314	-0.0539676	0.0175384	-3.07711	0.00209019	0.0318491	k__Bacteria	p__Proteobacteria	c__Betaproteobacteria	o__Burkholderiales	f__Alcaligenaceae	g__Bordetella	s__Bordetella pertussis
3176.63	-0.0519686	0.0168929	-3.07635	0.0020955	0.0318491	k__Bacteria	p__Chlamydiae	c__Chlamydiia	o__Chlamydiales	f__Chlamydiaceae	g__Chlamydia	s__Chlamydia trachomatis
119.295	0.0386849	0.012653	3.05737	0.00223287	0.0337397	k__Bacteria	p__Firmicutes	c__Clostridia	o__Clostridiales	f__Ruminococcaceae	g__Provencibacterium	s__Provencibacterium massiliense
2293.53	-0.0463003	0.0151612	-3.05386	0.00225919	0.0338748	k__Bacteria	p__Bacteroidetes	c__Bacteroidia	o__Bacteroidales	f__Bacteroidaceae	g__Bacteroides	s__Bacteroides massiliensis
108.622	-0.0770692	0.0252549	-3.05166	0.00227583	0.0338748	k__Bacteria	p__Firmicutes	c__Bacilli	o__Lactobacillales	f__Streptococcaceae	g__Streptococcus	s__Streptococcus mutans
63.0998	0.0427633	0.0140162	3.05099	0.00228091	0.0338748	k__Bacteria	p__Firmicutes	c__Erysipelotrichia	o__Erysipelotrichales	f__Erysipelotrichaceae	g__Erysipelotrichaceae__na	s__Erysipelotrichaceae bacterium 21_3
1.98618	-0.0919296	0.0302986	-3.03412	0.0024124	0.0352777	k__Bacteria	p__Bacteria__na	c__Bacteria__na	o__Bacteria__na	f__Bacteria__na	g__Bacteria__na	s__uncultured bacterium 22g15
21.0909	-0.0416807	0.0137381	-3.03396	0.0024137	0.0352777	k__Bacteria	p__Firmicutes	c__Negativicutes	o__Veillonellales	f__Veillonellaceae	g__Megasphaera	s__Megasphaera cerevisiae
106.059	-0.0617621	0.020359	-3.03366	0.00241609	0.0352777	k__Bacteria	p__Bacteroidetes	c__Bacteroidia	o__Bacteroidales	f__Prevotellaceae	g__Prevotella	s__Prevotella bergensis
109.7	-0.0536617	0.017709	-3.03019	0.00244398	0.0354382	k__Bacteria	p__Firmicutes	c__Clostridia	o__Clostridiales	f__Clostridiales Family XIII. Incertae Sedis	g__Mobilibacterium	s__Mobilibacterium timonense
1618.98	-0.0670801	0.0221564	-3.02757	0.00246528	0.0354382	k__Bacteria	p__Bacteroidetes	c__Bacteroidia	o__Bacteroidales	f__Prevotellaceae	g__Prevotellaceae__uc	s__Prevotellaceae__uc
4.06069	-0.117897	0.0389452	-3.02724	0.00246799	0.0354382	k__Bacteria	p__Bacteria__na	c__Bacteria__na	o__Bacteria__na	f__Bacteria__na	g__Bacteria__na	s__uncultured bacterium 2M03
4.06131	-0.0919227	0.0304014	-3.02364	0.00249756	0.0356657	k__Bacteria	p__Bacteria__na	c__Bacteria__na	o__Bacteria__na	f__Bacteria__na	g__Bacteria__na	s__uncultured bacterium 4L05
280.663	-0.0333617	0.0110483	-3.01962	0.00253092	0.0356704	k__Bacteria	p__Bacteroidetes	c__Bacteroidia	o__Bacteroidales	f__Bacteroidaceae	g__Bacteroides	s__Bacteroides gallinarum
145.523	0.0920939	0.0305242	3.01708	0.00255219	0.0356704	k__Bacteria	p__Tenericutes	c__Mollicutes	o__Acholeplasmatales	f__Acholeplasmataceae	g__Acholeplasma	s__Acholeplasma sp. CAG:878
62.1897	-0.0334388	0.0110832	-3.01708	0.00255223	0.0356704	k__Bacteria	p__Firmicutes	c__Clostridia	o__Clostridiales	f__Lachnospiraceae	g__Lachnospiraceae__na	s__Lachnospiraceae bacterium 2_1_46FAA
16.1392	-0.0641606	0.0212663	-3.01701	0.00255279	0.0356704	k__Bacteria	p__Bacteroidetes	c__Bacteroidia	o__Bacteroidales	f__Prevotellaceae	g__Prevotella	s__Prevotella sp. oral taxon 299
17.7262	-0.0954075	0.0316795	-3.01165	0.00259836	0.036105	k__Bacteria	p__Bacteroidetes	c__Bacteroidia	o__Bacteroidales	f__Porphyromonadaceae	g__Porphyromonas	s__Porphyromonas somerae
354.959	0.0535657	0.0177954	3.01009	0.00261167	0.036105	k__Bacteria	p__Firmicutes	c__Clostridia	o__Clostridiales	f__Lachnospiraceae	g__Roseburia	s__Roseburia sp. CAG:182
222.411	-0.0535908	0.0178483	-3.00257	0.00267712	0.0368139	k__Bacteria	p__Bacteroidetes	c__Bacteroidia	o__Bacteroidales	f__Bacteroidaceae	g__Bacteroides	s__Bacteroides faecis
26.9566	0.0470935	0.0157166	2.99642	0.00273169	0.0373666	k__Bacteria	p__Actinobacteria	c__Coriobacteriia	o__Coriobacteriales	f__Atopobiaceae	g__Olsenella	s__Olsenella sp. KH3B4
53.6618	-0.061975	0.020734	-2.98905	0.00279846	0.0380796	k__Bacteria	p__Firmicutes	c__Clostridia	o__Clostridiales	f__Clostridiaceae	g__Clostridium	s__Clostridium sp. 1_1_41A1FAA
4.45487	-0.0441681	0.0147914	-2.98606	0.00282594	0.0382532	k__Bacteria	p__Bacteroidetes	c__Bacteroidia	o__Bacteroidales	f__Porphyromonadaceae	g__Proteiniphilum	s__Proteiniphilum acetatigenes
12.4817	-0.0608037	0.0203872	-2.98245	0.00285951	0.038507	k__Bacteria	p__Firmicutes	c__Clostridia	o__Clostridiales	f__Ruminococcaceae	g__Ruminococcus	s__Ruminococcus sp. DSM 100440
79.893	-0.0487962	0.0164218	-2.97143	0.00296418	0.0397108	k__Bacteria	p__Firmicutes	c__Clostridia	o__Clostridiales	f__Lachnospiraceae	g__Anaerostipes	s__Anaerostipes__uc
227.8	-0.0789609	0.02659	-2.96957	0.00298219	0.0397472	k__Bacteria	p__Firmicutes	c__Negativicutes	o__Veillonellales	f__Veillonellaceae	g__Allisonella	s__Allisonella histaminiformans
8.37131	0.0329281	0.0111507	2.953	0.00314707	0.0417307	k__Bacteria	p__Firmicutes	c__Clostridia	o__Clostridiales	f__Ruminococcaceae	g__Ruminococcaceae__na	s__Ruminococcaceae bacterium AB4001
11.385	0.0290486	0.00986215	2.94547	0.00322467	0.0425428	k__Bacteria	p__Firmicutes	c__Clostridia	o__Clostridiales	f__Ruminococcaceae	g__Ruminiclostridium	s__[Clostridium] stercorarium
227.804	-0.0656951	0.0224205	-2.93014	0.0033881	0.0444731	k__Bacteria	p__Bacteroidetes	c__Bacteroidia	o__Bacteroidales	f__Prevotellaceae	g__Prevotella	s__Prevotella sp. AGR2160
2.48584	0.0346845	0.0118658	2.92306	0.00346605	0.0452677	k__Bacteria	p__Firmicutes	c__Clostridia	o__Thermoanaerobacterales	f__Thermoanaerobacteraceae	g__Tepidanaerobacter	s__Tepidanaerobacter syntrophicus
5.23185	-0.0360224	0.012348	-2.91727	0.00353115	0.0457701	k__Bacteria	p__Firmicutes	c__Bacilli	o__Lactobacillales	f__Carnobacteriaceae	g__Carnobacterium	s__Carnobacterium maltaromaticum
2.95906	-0.0711377	0.0243914	-2.91651	0.00353974	0.0457701	k__Bacteria	p__Bacteroidetes	c__Bacteroidia	o__Bacteroidales	f__Porphyromonadaceae	g__Porphyromonas	s__Porphyromonas canoris
245.581	0.0698194	0.0239784	2.91177	0.00359392	0.0462406	k__Bacteria	p__Firmicutes	c__Clostridia	o__Clostridiales	f__Clostridiaceae	g__Clostridium	s__Clostridium sp. CAG:571
14.2563	0.0688865	0.0236967	2.90701	0.00364898	0.0467178	k__Bacteria	p__Firmicutes	c__Clostridia	o__Clostridiales	f__Clostridiaceae	g__Clostridium	s__Clostridium sp. CAG:1219
973.51	-0.0432012	0.014914	-2.89669	0.00377122	0.0480461	k__Bacteria	p__Bacteroidetes	c__Bacteroidia	o__Bacteroidales	f__Bacteroidaceae	g__Bacteroides	s__Bacteroides finegoldii
24.6705	-0.0497191	0.0172213	-2.88707	0.00388852	0.0492989	k__Bacteria	p__Bacteroidetes	c__Bacteroidia	o__Bacteroidales	f__Bacteroidaceae	g__Bacteroides	s__Bacteroides sp. AR20
89.068	-0.0542625	0.0188305	-2.88163	0.00395621	0.0494066	k__Bacteria	p__Bacteroidetes	c__Bacteroidia	o__Bacteroidales	f__Bacteroidaceae	g__Bacteroides	s__Bacteroides dorei CAG:222
7.10549	0.0623687	0.0216497	2.88081	0.0039665	0.0494066	k__Bacteria	p__Spirochaetes	c__Spirochaetia	o__Brachyspirales	f__Brachyspiraceae	g__Brachyspira	s__Brachyspira pilosicoli
11.7907	-0.0447126	0.0155278	-2.87952	0.00398275	0.0494066	k__Bacteria	p__Firmicutes	c__Bacilli	o__Lactobacillales	f__Lactobacillaceae	g__Lactobacillus	s__Lactobacillus delbrueckii
2.38374	-0.160907	0.0559209	-2.87741	0.00400949	0.0494066	k__Bacteria	p__Bacteroidetes	c__Sphingobacteriia	o__Sphingobacteriales	f__Sphingobacteriaceae	g__Pedobacter	s__Pedobacter sp. Leaf216
16.3209	-0.0648331	0.0225325	-2.87731	0.00401079	0.0494066	k__Bacteria	p__Bacteroidetes	c__Bacteroidia	o__Bacteroidales	f__Prevotellaceae	g__Prevotella	s__Prevotella sp. P6B1
1.32351	0.0795682	0.0276586	2.8768	0.00401731	0.0494066	k__Bacteria	p__Spirochaetes	c__Spirochaetia	o__Brachyspirales	f__Brachyspiraceae	g__Brachyspira	s__Brachyspira hyodysenteriae
1.87798	-0.0615647	0.0214079	-2.8758	0.00403008	0.0494066	k__Bacteria	p__Firmicutes	c__Negativicutes	o__Selenomonadales	f__Selenomonadaceae	g__Selenomonas	s__Selenomonas sp. oral taxon 478
261.098	-0.0455965	0.015915	-2.865	0.00417015	0.0507055	k__Bacteria	p__Bacteroidetes	c__Bacteroidia	o__Bacteroidales	f__Rikenellaceae	g__Alistipes	s__Alistipes sp. HGB5
24.214	-0.0229165	0.00799985	-2.86462	0.00417506	0.0507055	k__Bacteria	p__Firmicutes	c__Bacilli	o__Bacillales	f__Listeriaceae	g__Listeria	s__Listeria monocytogenes
333.074	-0.0472167	0.0164913	-2.86313	0.00419474	0.0507076	k__Bacteria	p__Bacteroidetes	c__Bacteroidia	o__Bacteroidales	f__Bacteroidaceae	g__Bacteroides	s__Bacteroides sp. 9_1_42FAA
3685.78	-0.0559527	0.0195759	-2.85824	0.00425999	0.0511961	k__Bacteria	p__Bacteroidetes	c__Bacteroidia	o__Bacteroidales	f__Bacteroidaceae	g__Bacteroides	s__Bacteroides stercoris
2.59414	-0.0538033	0.0188311	-2.85716	0.00427455	0.0511961	k__Bacteria	p__Bacteroidetes	c__Flavobacteriia	o__Flavobacteriales	f__Flavobacteriaceae	g__Myroides	s__Myroides__uc
1.57797	0.047328	0.0165874	2.85325	0.00432739	0.0515913	k__Bacteria	p__Firmicutes	c__Bacilli	o__Bacillales	f__Bacillaceae	g__Bacillus	s__Bacillus niameyensis
5.54707	-0.0572845	0.0201808	-2.83857	0.00453158	0.0537789	k__Bacteria	p__Firmicutes	c__Negativicutes	o__Selenomonadales	f__Selenomonadaceae	g__Selenomonas	s__Selenomonas sp. oral taxon 149
6.8607	-0.0517461	0.018243	-2.83649	0.00456131	0.0538856	k__Bacteria	p__Bacteroidetes	c__Bacteroidia	o__Bacteroidales	f__Porphyromonadaceae	g__Porphyromonas	s__Porphyromonas catoniae
5.38851	-0.0452833	0.015985	-2.83287	0.00461328	0.054253	k__Bacteria	p__Actinobacteria	c__Coriobacteriia	o__Coriobacteriales	f__Coriobacteriaceae	g__Olegusella	s__Olegusella massiliensis
113.894	0.0549117	0.0194095	2.82912	0.00466767	0.0546316	k__Bacteria	p__Firmicutes	c__Firmicutes__na	o__Firmicutes__na	f__Firmicutes__na	g__Firmicutes__na	s__Firmicutes bacterium CAG:137_57_8
101.78	-0.0650791	0.023026	-2.82633	0.0047085	0.0546316	k__Bacteria	p__Bacteroidetes	c__Bacteroidia	o__Bacteroidales	f__Prevotellaceae	g__Prevotella	s__Prevotella ihumii
1044.39	-0.0567957	0.0200952	-2.82633	0.00470854	0.0546316	k__Bacteria	p__Bacteroidetes	c__Bacteroidia	o__Bacteroidales	f__Bacteroidaceae	g__Bacteroides	s__Bacteroides sp. CAG:530
38.3571	0.0194677	0.00694963	2.80126	0.00509039	0.0586371	k__Bacteria	p__Firmicutes	c__Clostridia	o__Clostridiales	f__Lachnospiraceae	g__Lachnoclostridium	s__[Clostridium] fimetarium
1.45797	0.121684	0.0434473	2.80072	0.00509888	0.0586371	k__Bacteria	p__Firmicutes	c__Bacilli	o__Lactobacillales	f__Lactobacillaceae	g__Lactobacillus	s__Lactobacillus pontis
642.978	0.0312266	0.0111972	2.78878	0.00529077	0.060384	k__Bacteria	p__Firmicutes	c__Clostridia	o__Clostridiales	f__Lachnospiraceae	g__Eisenbergiella	s__Eisenbergiella tayi
123.106	0.0462615	0.0165908	2.78838	0.00529725	0.060384	k__Bacteria	p__Firmicutes	c__Clostridia	o__Clostridiales	f__Ruminococcaceae	g__Ruminococcus	s__Ruminococcus sp. CAG:724
1.22659	-0.0858334	0.0308522	-2.78209	0.00540104	0.0612982	k__Bacteria	p__Firmicutes	c__Bacilli	o__Lactobacillales	f__Lactobacillaceae	g__Lactobacillus	s__Lactobacillus nodensis
23.6256	-0.0600306	0.0216225	-2.7763	0.00549817	0.0621293	k__Bacteria	p__Actinobacteria	c__Coriobacteriia	o__Eggerthellales	f__Eggerthellaceae	g__Eggerthella	s__Eggerthella sp. HGA1
4.92389	-0.0315796	0.0113924	-2.77198	0.00557162	0.0626255	k__Bacteria	p__Proteobacteria	c__Betaproteobacteria	o__Burkholderiales	f__Burkholderiaceae	g__Ralstonia	s__Ralstonia mannitolilytica
67.821	-0.0518032	0.0186955	-2.77089	0.00559027	0.0626255	k__Bacteria	p__Bacteroidetes	c__Bacteroidia	o__Bacteroidales	f__Prevotellaceae	g__Prevotella	s__Prevotella denticola
5.36879	-0.0615858	0.0222705	-2.76536	0.00568606	0.0634252	k__Bacteria	p__Firmicutes	c__Erysipelotrichia	o__Erysipelotrichales	f__Erysipelotrichaceae	g__Erysipelotrichaceae__na	s__Erysipelotrichaceae bacterium CAG:64
2.99065	-0.054053	0.0196009	-2.75769	0.00582118	0.0646549	k__Bacteria	p__Actinobacteria	c__Actinobacteria	o__Actinomycetales	f__Actinomycetaceae	g__Actinomyces	s__Actinomyces cardiffensis
28.1113	-0.0622433	0.0225936	-2.75491	0.00587089	0.0648485	k__Bacteria	p__Proteobacteria	c__Deltaproteobacteria	o__Desulfovibrionales	f__Desulfovibrionaceae	g__Desulfovibrio	s__Desulfovibrio fairfieldensis
22.3301	0.0220662	0.00801264	2.75393	0.00588851	0.0648485	k__Bacteria	p__Firmicutes	c__Clostridia	o__Clostridiales	f__Ruminococcaceae	g__Ruminococcus	s__Ruminococcus sp. FC2018
15.0393	0.0518191	0.0188302	2.75192	0.00592478	0.0649726	k__Bacteria	p__Actinobacteria	c__Actinobacteria	o__Bifidobacteriales	f__Bifidobacteriaceae	g__Bifidobacterium	s__Bifidobacterium moukalabense
93.7138	0.0561579	0.0204477	2.74642	0.00602501	0.0657671	k__Bacteria	p__Bacteroidetes	c__Bacteroidia	o__Bacteroidales	f__Prevotellaceae	g__Prevotella	s__Prevotella sp. CAG:617
2.01721	-0.0894584	0.0325875	-2.74518	0.00604784	0.0657671	k__Bacteria	p__Proteobacteria	c__Betaproteobacteria	o__Betaproteobacteria__na	f__Betaproteobacteria__na	g__Betaproteobacteria__na	s__uncultured beta proteobacterium CBNPD1 BAC clone 578
39.3302	0.0352592	0.0128564	2.74254	0.00609667	0.0660219	k__Bacteria	p__Firmicutes	c__Clostridia	o__Clostridiales	f__Clostridiaceae	g__Clostridium	s__Clostridium sp. Bc-iso-3
8.35464	-0.0435821	0.0159654	-2.72978	0.00633767	0.0680785	k__Bacteria	p__Proteobacteria	c__Betaproteobacteria	o__Burkholderiales	f__Comamonadaceae	g__Curvibacter	s__Curvibacter putative symbiont of Hydra magnipapillata
3.67493	-0.0405427	0.0148524	-2.72971	0.00633897	0.0680785	k__Bacteria	p__Actinobacteria	c__Coriobacteriia	o__Coriobacteriales	f__Atopobiaceae	g__Atopobium	s__Atopobium sp. BS2
176.366	-0.0436395	0.0160186	-2.7243	0.00644379	0.0689194	k__Bacteria	p__Firmicutes	c__Clostridia	o__Clostridiales	f__Lachnospiraceae	g__Lachnospiraceae__na	s__Lachnospiraceae bacterium 1_4_56FAA
50.5638	-0.0740479	0.0272451	-2.71784	0.006571	0.069363	k__Bacteria	p__Bacteroidetes	c__Bacteroidia	o__Bacteroidales	f__Rikenellaceae	g__Alistipes	s__Alistipes sp. CAG:157
8.77059	0.0237134	0.00873	2.71632	0.00660128	0.069363	k__Bacteria	p__Firmicutes	c__Clostridia	o__Clostridia__na	f__Clostridia__na	g__Clostridia__na	s__Clostridia bacterium BRH_c25
7.76317	0.0491567	0.0180982	2.71611	0.00660538	0.069363	k__Bacteria	p__Actinobacteria	c__Coriobacteriia	o__Coriobacteriales	f__Atopobiaceae	g__Olsenella	s__Olsenella scatoligenes
11.2404	-0.0417413	0.0153682	-2.71608	0.00660604	0.069363	k__Bacteria	p__Firmicutes	c__Negativicutes	o__Selenomonadales	f__Selenomonadaceae	g__Anaerovibrio	s__Anaerovibrio sp. RM50
55.4749	-0.0291525	0.0107395	-2.7145	0.00663762	0.069363	k__Bacteria	p__Bacteroidetes	c__Bacteroidia	o__Bacteroidales	f__Bacteroidaceae	g__Bacteroides	s__Bacteroides neonati
254.484	-0.052443	0.0193223	-2.71411	0.00664539	0.069363	k__Bacteria	p__Bacteroidetes	c__Bacteroidia	o__Bacteroidales	f__Prevotellaceae	g__Prevotella	s__Prevotella timonensis
15.9639	-0.0633385	0.0233549	-2.712	0.00668787	0.0695271	k__Bacteria	p__Firmicutes	c__Negativicutes	o__Veillonellales	f__Veillonellaceae	g__Anaeroglobus	s__Anaeroglobus geminatus
349.425	-0.0401138	0.0148131	-2.70799	0.00676922	0.0700924	k__Bacteria	p__Bacteroidetes	c__Bacteroidia	o__Bacteroidales	f__Bacteroidaceae	g__Bacteroides	s__Bacteroides sp. Marseille-P3208T
1941.01	-0.0384999	0.0142386	-2.70391	0.00685284	0.0705501	k__Bacteria	p__Bacteroidetes	c__Bacteroidia	o__Bacteroidales	f__Bacteroidaceae	g__Bacteroides	s__uncultured Bacteroides sp.
15.8035	-0.0323092	0.0119522	-2.70319	0.00686771	0.0705501	k__Bacteria	p__Firmicutes	c__Clostridia	o__Clostridiales	f__Clostridiales__na	g__Clostridiales__na	s__Clostridiales bacterium VE202-14
11.886	0.022558	0.00835902	2.69864	0.00696241	0.0710892	k__Bacteria	p__Firmicutes	c__Clostridia	o__Clostridiales	f__Ruminococcaceae	g__Mageeibacillus	s__Mageeibacillus indolicus
16.5167	0.0256375	0.00950226	2.69804	0.00697489	0.0710892	k__Bacteria	p__Firmicutes	c__Clostridia	o__Clostridiales	f__Clostridiales__na	g__Clostridiales__na	s__Clostridiales bacterium 43-6
146.789	0.0276311	0.0102504	2.69561	0.00702593	0.0713296	k__Bacteria	p__Firmicutes	c__Clostridia	o__Clostridiales	f__Clostridiaceae	g__Clostridium	s__Clostridium sp. CAG:1013
4.10575	0.0366083	0.0136122	2.68937	0.00715866	0.0723943	k__Bacteria	p__Firmicutes	c__Clostridia	o__Clostridiales	f__Lachnospiraceae	g__Pseudobutyrivibrio	s__Pseudobutyrivibrio sp. AR14
136.164	0.0389661	0.0145295	2.68186	0.00732133	0.0737524	k__Bacteria	p__Firmicutes	c__Clostridia	o__Clostridiales	f__Clostridiaceae	g__Clostridium	s__Clostridium sp. CAG:277
129.147	-0.043446	0.0162208	-2.67841	0.00739719	0.0742289	k__Bacteria	p__Firmicutes	c__Clostridia	o__Clostridiales	f__Christensenellaceae	g__Christensenella	s__Christensenella massiliensis
7.22958	-0.0541539	0.0202451	-2.67491	0.00747498	0.0746087	k__Bacteria	p__Bacteroidetes	c__Bacteroidia	o__Bacteroidales	f__Prevotellaceae	g__Prevotella	s__Prevotella sp. HMSC073D09
1.95003	-0.0517598	0.0193558	-2.67413	0.00749245	0.0746087	k__Bacteria	p__Actinobacteria	c__Coriobacteriia	o__Coriobacteriales	f__Atopobiaceae	g__Olsenella	s__Olsenella sp. Marseille-P2936
30.6115	-0.0290027	0.0108884	-2.66364	0.00773001	0.0766805	k__Bacteria	p__Firmicutes	c__Clostridia	o__Clostridiales	f__Clostridiaceae	g__Clostridium	s__Clostridium sp. FS41
2.85573	-0.042735	0.0160727	-2.65886	0.0078406	0.0774818	k__Bacteria	p__Bacteroidetes	c__Bacteroidia	o__Marinilabiliales	f__Marinilabiliaceae	g__Saccharicrinis	s__Saccharicrinis fermentans
5.56915	0.033194	0.0125293	2.64931	0.00806558	0.0786008	k__Bacteria	p__Firmicutes	c__Clostridia	o__Clostridiales	f__Clostridiaceae	g__Geosporobacter	s__Geosporobacter ferrireducens
2.54362	0.0854143	0.0322411	2.64924	0.00806738	0.0786008	k__Bacteria	p__Proteobacteria	c__Gammaproteobacteria	o__Pasteurellales	f__Pasteurellaceae	g__Aggregatibacter	s__Aggregatibacter actinomycetemcomitans
127.786	-0.0460199	0.0173763	-2.64844	0.00808652	0.0786008	k__Bacteria	p__Bacteroidetes	c__Bacteroidia	o__Bacteroidales	f__Bacteroidaceae	g__Bacteroides	s__Bacteroides sp. CAG:714
2.72942	0.0530801	0.020049	2.64753	0.00810832	0.0786008	k__Bacteria	p__Bacteria__na	c__Bacteria__na	o__Bacteria__na	f__Bacteria__na	g__Bacteria__na	s__uncultured bacterium IN-02
60.1668	0.0194845	0.00736171	2.64674	0.00812718	0.0786008	k__Bacteria	p__Bacteria__na	c__Bacteria__na	o__Bacteria__na	f__Bacteria__na	g__Bacteria__na	s__bacterium MS4
18.4722	0.0273384	0.0103304	2.6464	0.00813528	0.0786008	k__Bacteria	p__Firmicutes	c__Clostridia	o__Clostridiales	f__Clostridiaceae	g__Clostridium	s__Clostridium sp. SCN 57-10
74.8661	0.0785562	0.0297925	2.63677	0.00836986	0.0802778	k__Bacteria	p__Firmicutes	c__Clostridia	o__Clostridiales	f__Clostridiaceae	g__Clostridium	s__Clostridium sp. CAG:762
5.68677	0.0331702	0.0125804	2.63665	0.00837281	0.0802778	k__Bacteria	p__Firmicutes	c__Clostridia	o__Clostridiales	f__Lachnospiraceae	g__Butyrivibrio	s__Butyrivibrio sp. VCB2001
1.81213	-0.103284	0.0391942	-2.63518	0.00840934	0.0802778	k__Bacteria	p__Proteobacteria	c__Gammaproteobacteria	o__Enterobacterales	f__Morganellaceae	g__Morganella	s__Morganella morganii
89.9677	-0.0403311	0.0153103	-2.63425	0.00843242	0.0802778	k__Bacteria	p__Bacteroidetes	c__Bacteroidia	o__Bacteroidales	f__Prevotellaceae	g__Prevotella	s__Prevotella corporis
5.40818	-0.100214	0.0380855	-2.63129	0.00850616	0.0806844	k__Bacteria	p__Proteobacteria	c__Gammaproteobacteria	o__Enterobacterales	f__Enterobacteriaceae	g__Escherichia	s__Escherichia fergusonii
2.22106	0.0430406	0.0163708	2.62911	0.00856098	0.0807302	k__Bacteria	p__Firmicutes	c__Clostridia	o__Clostridiales	f__Clostridiales__na	g__Clostridiales__na	s__Clostridiales bacterium GWD2_32_59
2.17861	0.0322206	0.0122592	2.62829	0.00858162	0.0807302	k__Bacteria	p__Firmicutes	c__Clostridia	o__Clostridiales	f__Clostridiales__na	g__Clostridiales__na	s__Clostridiales bacterium PH28_bin88
13.945	0.0191049	0.00727142	2.62739	0.00860418	0.0807302	k__Bacteria	p__Spirochaetes	c__Spirochaetia	o__Spirochaetales	f__Spirochaetaceae	g__Treponema	s__Treponema__uc
53.8469	-0.0252566	0.00964227	-2.61936	0.00880946	0.0823589	k__Bacteria	p__Proteobacteria	c__Betaproteobacteria	o__Burkholderiales	f__Burkholderiaceae	g__Ralstonia	s__Ralstonia__uc
9.8863	-0.0385875	0.0147775	-2.61124	0.00902143	0.0840383	k__Bacteria	p__Bacteroidetes	c__Flavobacteriia	o__Flavobacteriales	f__Flavobacteriaceae	g__Capnocytophaga	s__Capnocytophaga__uc
56.9342	-0.0174987	0.00670858	-2.60841	0.00909636	0.0843076	k__Bacteria	p__Firmicutes	c__Clostridia	o__Clostridiales	f__Clostridiaceae	g__Clostridium	s__Clostridium sp. Marseille-P2415
1.88589	-0.0985132	0.0377778	-2.6077	0.00911521	0.0843076	k__Bacteria	p__Firmicutes	c__Bacilli	o__Bacillales	f__Staphylococcaceae	g__Staphylococcus	s__Staphylococcus equorum
69.4142	-0.0393612	0.0151152	-2.60407	0.00921235	0.0849039	k__Bacteria	p__Bacteroidetes	c__Bacteroidia	o__Bacteroidales	f__Bacteroidaceae	g__Bacteroides	s__Bacteroides vulgatus CAG:6
4.56948	-0.0810095	0.0311451	-2.60103	0.0092943	0.0853565	k__Bacteria	p__Firmicutes	c__Negativicutes	o__Veillonellales	f__Veillonellaceae	g__Megasphaera	s__uncultured Megasphaera sp.
154.128	-0.0548956	0.0211274	-2.59831	0.0093683	0.0857332	k__Bacteria	p__Bacteroidetes	c__Bacteroidia	o__Bacteroidales	f__Prevotellaceae	g__Prevotella	s__Prevotella maculosa
23.7952	0.0531882	0.0205095	2.59334	0.00950487	0.0866777	k__Bacteria	p__Bacteroidetes	c__Bacteroidia	o__Bacteroidales	f__Porphyromonadaceae	g__Gabonibacter	s__Gabonibacter massiliensis
74.3452	-0.0491956	0.0189874	-2.59096	0.00957078	0.0869736	k__Bacteria	p__Proteobacteria	c__Gammaproteobacteria	o__Enterobacterales	f__Enterobacteriaceae	g__Salmonella	s__Salmonella enterica
193.379	-0.0375486	0.0145414	-2.58219	0.00981765	0.0887693	k__Bacteria	p__Bacteroidetes	c__Bacteroidia	o__Bacteroidales	f__Porphyromonadaceae	g__Parabacteroides	s__Parabacteroides sp. 20_3
15.832	-0.0493317	0.0191096	-2.58152	0.00983669	0.0887693	k__Bacteria	p__Firmicutes	c__Clostridia	o__Clostridiales	f__Eubacteriaceae	g__Eubacterium	s__Eubacterium dolichum CAG:375
7.40032	0.0582864	0.022597	2.57939	0.00989761	0.08901	k__Bacteria	p__Actinobacteria	c__Actinobacteria	o__Bifidobacteriales	f__Bifidobacteriaceae	g__Bifidobacterium	s__Bifidobacterium sp. MSTE12
4.47775	-0.0508527	0.0197306	-2.57735	0.00995605	0.0892268	k__Bacteria	p__Actinobacteria	c__Actinobacteria	o__Micrococcales	f__Micrococcaceae	g__Rothia	s__Rothia mucilaginosa
65.366	-0.0293868	0.0114719	-2.56163	0.0104183	0.0930482	k__Bacteria	p__Firmicutes	c__Erysipelotrichia	o__Erysipelotrichales	f__Erysipelotrichaceae	g__Erysipelotrichaceae__na	s__Erysipelotrichaceae bacterium 3_1_53
114.185	-0.0418578	0.0163624	-2.55817	0.0105224	0.0936565	k__Bacteria	p__Bacteroidetes	c__Bacteroidia	o__Bacteroidales	f__Porphyromonadaceae	g__Tannerella	s__Tannerella sp. CAG:51
2.89579	0.0305322	0.0119832	2.54792	0.0108367	0.0961246	k__Bacteria	p__Firmicutes	c__Clostridia	o__Thermoanaerobacterales	f__Thermoanaerobacteraceae	g__Caldanaerobius	s__Caldanaerobius polysaccharolyticus
26.7433	-0.0399	0.0156858	-2.5437	0.0109687	0.0969645	k__Bacteria	p__Bacteroidetes	c__Bacteroidia	o__Bacteroidales	f__Prevotellaceae	g__Prevotella	s__Prevotella oris
112.47	-0.0476405	0.0187618	-2.53923	0.0111097	0.0978782	k__Bacteria	p__Bacteroidetes	c__Bacteroidia	o__Bacteroidales	f__Odoribacteraceae	g__Odoribacter	s__Odoribacter laneus
21.8623	-0.0303149	0.0119826	-2.52992	0.0114089	0.0998524	k__Bacteria	p__Bacteroidetes	c__Bacteroidia	o__Bacteroidales	f__Bacteroidaceae	g__Bacteroides	s__Bacteroides coprosuis
3.17151	0.0240574	0.00950936	2.52987	0.0114106	0.0998524	k__Bacteria	p__Firmicutes	c__Clostridia	o__Clostridiales	f__Lachnospiraceae	g__Anaerocolumna	s__Anaerocolumna__uc
71.0724	-0.0349906	0.0138447	-2.52736	0.0114923	0.10023	k__Bacteria	p__Firmicutes	c__Clostridia	o__Clostridiales	f__Clostridiales Family XIII. Incertae Sedis	g__Mogibacterium	s__Mogibacterium__uc
6.88598	-0.0457714	0.0181204	-2.52595	0.0115385	0.100296	k__Bacteria	p__Bacteroidetes	c__Bacteroidia	o__Bacteroidales	f__Porphyromonadaceae	g__Porphyromonas	s__Porphyromonas endodontalis
34.1394	-0.0385639	0.0153333	-2.51504	0.011902	0.103068	k__Bacteria	p__Actinobacteria	c__Coriobacteriia	o__Coriobacteriales	f__Atopobiaceae	g__Olsenella	s__Olsenella sp. Marseille-P3256
17.2254	-0.0268003	0.0106733	-2.51097	0.01204	0.103068	k__Bacteria	p__Firmicutes	c__Clostridia	o__Clostridiales	f__Ruminococcaceae	g__Ruminococcus	s__Ruminococcus sp. AT10
135.177	-0.02471	0.00984185	-2.51071	0.0120488	0.103068	k__Bacteria	p__Firmicutes	c__Clostridia	o__Clostridiales	f__Clostridiaceae	g__Clostridium	s__Clostridium sp. CAG:81
6.51433	0.0280595	0.0111771	2.51044	0.0120581	0.103068	k__Bacteria	p__Chloroflexi	c__Anaerolineae	o__Anaerolineales	f__Anaerolineaceae	g__Flexilinea	s__Flexilinea flocculi
101.285	-0.0543136	0.0216354	-2.5104	0.0120595	0.103068	k__Bacteria	p__Bacteroidetes	c__Bacteroidia	o__Bacteroidales	f__Bacteroidales__na	g__Bacteroidales__na	s__Bacteroidales bacterium KA00344
126.696	-0.0533744	0.021271	-2.50925	0.0120987	0.103068	k__Bacteria	p__Bacteroidetes	c__Bacteroidia	o__Bacteroidales	f__Prevotellaceae	g__Prevotella	s__Prevotella sp. kh1p2
210.531	-0.0392587	0.0156574	-2.50735	0.0121641	0.103068	k__Bacteria	p__Bacteroidetes	c__Bacteroidia	o__Bacteroidales	f__Bacteroidaceae	g__Bacteroides	s__Bacteroides sp. 3_1_13
454.384	0.0425872	0.016987	2.50704	0.0121746	0.103068	k__Bacteria	p__Firmicutes	c__Clostridia	o__Clostridiales	f__Ruminococcaceae	g__Ruminococcus	s__Ruminococcus sp. CAG:17
33.106	0.0193542	0.00773682	2.50157	0.0123645	0.104335	k__Bacteria	p__Firmicutes	c__Clostridia	o__Clostridiales	f__Ruminococcaceae	g__Candidatus Soleaferrea	s__Candidatus Soleaferrea massiliensis
7001.49	-0.0267458	0.010702	-2.49915	0.0124493	0.104711	k__Bacteria	p__Firmicutes	c__Clostridia	o__Clostridiales	f__Ruminococcaceae	g__Faecalibacterium	s__uncultured Faecalibacterium sp.
152.934	0.0451154	0.0180712	2.49653	0.0125414	0.105028	k__Bacteria	p__Bacteroidetes	c__Bacteroidia	o__Bacteroidales	f__Rikenellaceae	g__Alistipes	s__Alistipes sp. 58_9_plus
1426.58	-0.0380839	0.0152593	-2.49579	0.0125678	0.105028	k__Bacteria	p__Bacteroidetes	c__Bacteroidia	o__Bacteroidales	f__Odoribacteraceae	g__Butyricimonas	s__Butyricimonas synergistica
2.84487	0.0302807	0.0121537	2.49149	0.012721	0.105749	k__Bacteria	p__Proteobacteria	c__Deltaproteobacteria	o__Desulfovibrionales	f__Desulfohalobiaceae	g__Desulfonauticus	s__Desulfonauticus sp. 38_4375
188.895	-0.0542411	0.0217741	-2.49108	0.0127355	0.105749	k__Bacteria	p__Proteobacteria	c__Gammaproteobacteria	o__Gammaproteobacteria__uc	f__Gammaproteobacteria__uc	g__Gammaproteobacteria__uc	s__Gammaproteobacteria__uc
1543.71	-0.0477372	0.0191796	-2.48896	0.0128117	0.106043	k__Bacteria	p__Actinobacteria	c__Coriobacteriia	o__Coriobacteriales	f__Coriobacteriaceae	g__Senegalimassilia	s__Senegalimassilia anaerobia
1.54308	-0.0852659	0.0342862	-2.48689	0.0128867	0.106325	k__Bacteria	p__Bacteria__na	c__Bacteria__na	o__Bacteria__na	f__Bacteria__na	g__Bacteria__na	s__uncultured bacterium CSL142
5068.68	-0.0638613	0.0257726	-2.47787	0.0132168	0.108704	k__Bacteria	p__Firmicutes	c__Negativicutes	o__Acidaminococcales	f__Acidaminococcaceae	g__Phascolarctobacterium	s__Phascolarctobacterium succinatutens
88.9712	-0.0355872	0.0144534	-2.46221	0.0138085	0.112985	k__Bacteria	p__Bacteroidetes	c__Bacteroidia	o__Bacteroidales	f__Porphyromonadaceae	g__Parabacteroides	s__Parabacteroides sp. D26
491.441	0.039743	0.0161439	2.4618	0.0138243	0.112985	k__Bacteria	p__Firmicutes	c__Firmicutes__na	o__Firmicutes__na	f__Firmicutes__na	g__Firmicutes__na	s__Firmicutes bacterium CAG:238
91.1899	-0.0212915	0.00865781	-2.45923	0.0139235	0.11344	k__Bacteria	p__Firmicutes	c__Clostridia	o__Clostridiales	f__Clostridiales__na	g__Clostridiales__na	s__Clostridiales bacterium 1_7_47FAA
15.7107	0.0599301	0.0243921	2.45695	0.0140124	0.113807	k__Bacteria	p__Spirochaetes	c__Spirochaetia	o__Brachyspirales	f__Brachyspiraceae	g__Brachyspira	s__Brachyspira__uc
118.165	-0.0294045	0.0119785	-2.45477	0.0140974	0.114141	k__Bacteria	p__Firmicutes	c__Erysipelotrichia	o__Erysipelotrichales	f__Erysipelotrichaceae	g__Erysipelotrichaceae__na	s__Erysipelotrichaceae bacterium 6_1_45
282.635	-0.0270808	0.0110417	-2.45259	0.0141833	0.11448	k__Bacteria	p__Firmicutes	c__Clostridia	o__Clostridiales	f__Clostridiales__na	g__Clostridiales__na	s__Clostridiales bacterium VE202-21
6.96792	0.027776	0.0113383	2.44976	0.0142953	0.115027	k__Bacteria	p__Firmicutes	c__Tissierellia	o__Tissierellales	f__Peptoniphilaceae	g__Murdochiella	s__Murdochiella massiliensis
15.0104	-0.0528231	0.0216088	-2.44452	0.0145045	0.11635	k__Bacteria	p__Bacteroidetes	c__Bacteroidia	o__Bacteroidales	f__Prevotellaceae	g__Prevotella	s__Prevotella aurantiaca
89.8785	-0.0336749	0.0137985	-2.44047	0.0146681	0.1173	k__Bacteria	p__Firmicutes	c__Clostridia	o__Clostridiales	f__Lachnospiraceae	g__Lachnoclostridium	s__[Clostridium] glycyrrhizinilyticum
224.721	-0.0350264	0.01436	-2.43917	0.0147211	0.117362	k__Bacteria	p__Bacteroidetes	c__Bacteroidia	o__Bacteroidales	f__Bacteroidaceae	g__Bacteroides	s__Bacteroides sp. Marseille-P3108
95.404	-0.0275321	0.0113015	-2.43614	0.0148451	0.117989	k__Bacteria	p__Firmicutes	c__Clostridia	o__Clostridiales	f__Clostridiaceae	g__Clostridium	s__Clostridium sp. 7_3_54FAA
38.1529	0.0116996	0.00481656	2.42904	0.015139	0.119958	k__Bacteria	p__Firmicutes	c__Bacilli	o__Bacillales	f__Paenibacillaceae	g__Paenibacillus	s__Paenibacillus__uc
5.1322	0.0235303	0.00969914	2.42601	0.0152657	0.120594	k__Bacteria	p__Firmicutes	c__Tissierellia	o__Tissierellales	f__Peptoniphilaceae	g__Anaerosphaera	s__Anaerosphaera aminiphila
209.185	0.0267851	0.0110552	2.42286	0.015399	0.121058	k__Bacteria	p__Firmicutes	c__Clostridia	o__Clostridiales	f__Ruminococcaceae	g__Ruminiclostridium	s__[Clostridium] leptum
297.54	-0.0500966	0.0206804	-2.42242	0.0154176	0.121058	k__Bacteria	p__Bacteroidetes	c__Bacteroidia	o__Bacteroidales	f__Prevotellaceae	g__Prevotella	s__Prevotella bryantii
17.9089	-0.0321368	0.0132796	-2.42001	0.0155199	0.121215	k__Bacteria	p__Bacteroidetes	c__Bacteroidia	o__Bacteroidales	f__Porphyromonadaceae	g__Porphyromonadaceae__na	s__Porphyromonadaceae bacterium MV12
2.26717	0.0586661	0.0242446	2.41976	0.0155308	0.121215	k__Bacteria	p__Bacteria__na	c__Bacteria__na	o__Bacteria__na	f__Bacteria__na	g__Bacteria__na	s__uncultured bacterium IN-06
2.60765	0.0434582	0.0179788	2.41719	0.0156407	0.121707	k__Bacteria	p__Bacteroidetes	c__Bacteroidia	o__Bacteroidales	f__Bacteroidales__na	g__Bacteroidales__na	s__Bacteroidales bacterium 6E
8.22742	0.030343	0.0126031	2.40759	0.0160581	0.124582	k__Bacteria	p__Firmicutes	c__Clostridia	o__Clostridiales	f__Caldicoprobacteraceae	g__Caldicoprobacter	s__Caldicoprobacter__uc
23.1053	-0.0471967	0.0196448	-2.4025	0.0162833	0.125953	k__Bacteria	p__Bacteroidetes	c__Bacteroidia	o__Bacteroidales	f__Rikenellaceae	g__Tidjanibacter	s__Tidjanibacter massiliensis
63.6687	-0.0313445	0.0130636	-2.39939	0.0164226	0.126654	k__Bacteria	p__Firmicutes	c__Clostridia	o__Clostridiales	f__Lachnospiraceae	g__Lachnospiraceae__na	s__Lachnospiraceae bacterium 3_1_46FAA
69.9124	-0.023342	0.00973763	-2.39709	0.0165259	0.126816	k__Bacteria	p__Firmicutes	c__Erysipelotrichia	o__Erysipelotrichales	f__Erysipelotrichaceae	g__Erysipelotrichaceae__na	s__[Eubacterium] dolichum
1.65749	-0.0641651	0.0267717	-2.39675	0.0165413	0.126816	k__Bacteria	p__Bacteroidetes	c__Bacteroidetes__na	o__Bacteroidetes__na	f__Bacteroidetes__na	g__Bacteroidetes__na	s__Bacteroidetes bacterium CG2_30_33_31
33.5004	-0.0509856	0.0213156	-2.39193	0.0167599	0.128114	k__Bacteria	p__Firmicutes	c__Bacilli	o__Bacillales	f__Bacillales__na	g__Gemella	s__Gemella sanguinis
38.1266	0.0195828	0.00821107	2.38493	0.0170824	0.130197	k__Bacteria	p__Firmicutes	c__Clostridia	o__Clostridiales	f__Ruminococcaceae	g__Acetanaerobacterium	s__Acetanaerobacterium elongatum
37.273	0.0313937	0.0131935	2.37949	0.0173367	0.131384	k__Bacteria	p__Firmicutes	c__Clostridia	o__Clostridiales	f__Eubacteriaceae	g__Eubacterium	s__Eubacterium limosum
575.205	-0.0120496	0.00506405	-2.37943	0.0173393	0.131384	k__Bacteria	p__Firmicutes	c__Clostridia	o__Clostridiales	f__Clostridiaceae	g__Clostridium	s__Clostridium sp. M62/1
13.5424	0.0201181	0.00847465	2.37391	0.0176007	0.132705	k__Bacteria	p__Firmicutes	c__Clostridia	o__Clostridiales	f__Ruminococcaceae	g__Ruminiclostridium	s__Ruminiclostridium__uc
7.6875	-0.0319893	0.0134771	-2.3736	0.0176158	0.132705	k__Bacteria	p__Bacteroidetes	c__Bacteroidia	o__Bacteroidales	f__Porphyromonadaceae	g__Porphyromonas	s__Porphyromonas crevioricanis
2.76822	0.0317678	0.0134017	2.37043	0.0177673	0.133265	k__Bacteria	p__Firmicutes	c__Bacilli	o__Bacillales	f__Paenibacillaceae	g__Gorillibacterium	s__Gorillibacterium sp. SN4
18.6131	-0.0511082	0.0215655	-2.36991	0.0177926	0.133265	k__Bacteria	p__Bacteroidetes	c__Bacteroidia	o__Bacteroidales	f__Prevotellaceae	g__Prevotella	s__Prevotella falsenii
20.7177	-0.0475198	0.0201309	-2.36053	0.0182487	0.136288	k__Bacteria	p__Bacteroidetes	c__Bacteroidia	o__Bacteroidales	f__Prevotellaceae	g__Prevotella	s__Prevotella oralis
32.4151	-0.0580449	0.0246143	-2.35818	0.018365	0.136764	k__Bacteria	p__Firmicutes	c__Bacilli	o__Lactobacillales	f__Streptococcaceae	g__Streptococcus	s__Streptococcus infantarius
2186.43	0.0428514	0.0181932	2.35535	0.0185051	0.137324	k__Bacteria	p__Firmicutes	c__Clostridia	o__Clostridiales	f__Lachnospiraceae	g__Blautia	s__Blautia sp. CAG:237
3.67145	0.0913461	0.0387958	2.35454	0.0185459	0.137324	k__Bacteria	p__Firmicutes	c__Clostridia	o__Clostridiales	f__Clostridiaceae	g__Clostridium	s__Clostridium sp. CAG:729
4.25722	-0.0363767	0.015558	-2.33812	0.0193808	0.142218	k__Bacteria	p__Firmicutes	c__Negativicutes	o__Veillonellales	f__Veillonellaceae	g__Veillonella	s__Veillonella seminalis
1323.72	-0.0572499	0.0244859	-2.33808	0.0193832	0.142218	k__Bacteria	p__Bacteroidetes	c__Bacteroidia	o__Bacteroidales	f__Prevotellaceae	g__Prevotella	s__Prevotella stercorea
44.9656	0.0552666	0.0236441	2.33744	0.0194163	0.142218	k__Bacteria	p__Firmicutes	c__Clostridia	o__Clostridiales	f__Ruminococcaceae	g__Ruminococcus	s__Ruminococcus sp. CAG:379
119.171	-0.0252245	0.0107923	-2.33726	0.0194257	0.142218	k__Bacteria	p__Bacteroidetes	c__Bacteroidia	o__Bacteroidales	f__Bacteroidaceae	g__Bacteroides	s__Bacteroides helcogenes
2.71458	0.0290894	0.0124602	2.3346	0.0195646	0.142832	k__Bacteria	p__Firmicutes	c__Tissierellia	o__Tissierellales	f__Tissierellaceae	g__Tissierella	s__Tissierella creatinophila
149.873	0.025492	0.0109415	2.32984	0.0198148	0.144254	k__Bacteria	p__Firmicutes	c__Clostridia	o__Clostridiales	f__Ruminococcaceae	g__Anaeromassilibacillus	s__Anaeromassilibacillus sp. Marseille-P3371
41.1528	0.0404589	0.0173937	2.32607	0.0200146	0.144899	k__Bacteria	p__Firmicutes	c__Firmicutes__na	o__Firmicutes__na	f__Firmicutes__na	g__Firmicutes__na	s__Firmicutes bacterium CAG:212
4.28346	-0.0402569	0.0173078	-2.32593	0.0200221	0.144899	k__Bacteria	p__Firmicutes	c__Negativicutes	o__Selenomonadales	f__Selenomonadaceae	g__Selenomonas	s__Selenomonas sp. ND2010
5.98505	-0.0468287	0.0201412	-2.32503	0.0200706	0.144899	k__Bacteria	p__Proteobacteria	c__Gammaproteobacteria	o__Pseudomonadales	f__Moraxellaceae	g__Acinetobacter	s__Acinetobacter sp. 25977_7
3.73521	-0.0479026	0.0206133	-2.32387	0.0201325	0.144927	k__Bacteria	p__Firmicutes	c__Clostridia	o__Clostridiales	f__Clostridiaceae	g__Clostridium	s__Clostridium sp. HMSC19A11
52.3352	-0.0528102	0.0227349	-2.32287	0.0201861	0.144927	k__Bacteria	p__Bacteroidetes	c__Bacteroidia	o__Bacteroidales	f__Prevotellaceae	g__Prevotella	s__Prevotella histicola
162.821	-0.0465646	0.0200657	-2.32061	0.0203081	0.145402	k__Bacteria	p__Firmicutes	c__Bacilli	o__Lactobacillales	f__Enterococcaceae	g__Enterococcus	s__Enterococcus__uc
135.961	0.0389324	0.0168103	2.31599	0.0205588	0.146566	k__Bacteria	p__Firmicutes	c__Clostridia	o__Clostridiales	f__Lachnospiraceae	g__Roseburia	s__Roseburia sp. CAG:197_41_10
2.57304	0.0468319	0.0202251	2.31554	0.0205835	0.146566	k__Bacteria	p__Actinobacteria	c__Actinobacteria	o__Bifidobacteriales	f__Bifidobacteriaceae	g__Bifidobacterium	s__Bifidobacterium bohemicum
3.14918	-0.0511292	0.0220918	-2.31439	0.0206461	0.14661	k__Bacteria	p__Actinobacteria	c__Actinobacteria	o__Actinomycetales	f__Actinomycetaceae	g__Actinomyces	s__Actinomyces sp. oral taxon 877
8.49985	-0.030419	0.0131493	-2.31335	0.0207032	0.146615	k__Bacteria	p__Bacteroidetes	c__Bacteroidia	o__Bacteroidales	f__Bacteroidales__na	g__Bacteroidales__na	s__Bacteroidales bacterium 36-12
468.548	-0.0356324	0.0154171	-2.31122	0.0208208	0.147047	k__Bacteria	p__Bacteroidetes	c__Bacteroidia	o__Bacteroidales	f__Porphyromonadaceae	g__Parabacteroides	s__Parabacteroides johnsonii
175.681	0.0265746	0.0115034	2.31014	0.0208803	0.147067	k__Bacteria	p__Firmicutes	c__Erysipelotrichia	o__Erysipelotrichales	f__Erysipelotrichaceae	g__Coprobacillus	s__Coprobacillus sp. 8_1_38FAA
5.60221	0.102428	0.0444297	2.3054	0.0211443	0.148524	k__Bacteria	p__Proteobacteria	c__Gammaproteobacteria	o__Enterobacterales	f__Enterobacteriaceae	g__Leclercia	s__Leclercia adecarboxylata
240.247	-0.034775	0.0150929	-2.30406	0.0212193	0.148572	k__Bacteria	p__Bacteroidetes	c__Bacteroidia	o__Bacteroidales	f__Bacteroidaceae	g__Bacteroides	s__Bacteroides sp. Marseille-P2653
14.8114	0.0410215	0.0178104	2.30324	0.0212655	0.148572	k__Bacteria	p__Firmicutes	c__Bacilli	o__Lactobacillales	f__Enterococcaceae	g__Enterococcus	s__Enterococcus gallinarum
1610.76	0.0371073	0.0161282	2.30078	0.0214043	0.149142	k__Bacteria	p__Firmicutes	c__Clostridia	o__Clostridiales	f__Ruminococcaceae	g__Ruminiclostridium	s__[Eubacterium] siraeum
45.1976	0.0233253	0.010152	2.29762	0.0215833	0.149516	k__Bacteria	p__Firmicutes	c__Clostridia	o__Clostridiales	f__Ruminococcaceae	g__Sporobacter	s__Sporobacter termitidis
46.1718	0.0303501	0.0132094	2.29761	0.0215839	0.149516	k__Bacteria	p__Firmicutes	c__Clostridia	o__Clostridiales	f__Peptococcaceae	g__Dehalobacter	s__Dehalobacter sp. FTH1
124.129	-0.0469435	0.0204387	-2.29679	0.0216306	0.149516	k__Bacteria	p__Bacteroidetes	c__Bacteroidia	o__Bacteroidales	f__Prevotellaceae	g__Prevotella	s__Prevotella intermedia
72.416	-0.0394438	0.0171977	-2.29355	0.0218163	0.150141	k__Bacteria	p__Bacteroidetes	c__Bacteroidia	o__Bacteroidales	f__Prevotellaceae	g__Prevotella	s__Prevotella sp. HUN102
1.41032	-0.0734848	0.0320535	-2.29257	0.0218728	0.150141	k__Bacteria	p__Bacteroidetes	c__Bacteroidia	o__Bacteroidales	f__Bacteroidaceae	g__Bacteroides	s__Bacteroides sp. 3_2_5
137.98	-0.0573338	0.0250126	-2.29219	0.0218944	0.150141	k__Bacteria	p__Bacteroidetes	c__Bacteroidia	o__Bacteroidales	f__Prevotellaceae	g__Prevotella	s__Prevotella sp. P5-125
3.06141	0.025564	0.0111695	2.28873	0.0220952	0.150616	k__Bacteria	p__Firmicutes	c__Clostridia	o__Thermoanaerobacterales	f__Thermoanaerobacterales Family III. Incertae Sedis	g__Thermoanaerobacterium	s__Thermoanaerobacterium__uc
8.82463	-0.0211628	0.00924687	-2.28865	0.0220998	0.150616	k__Bacteria	p__Firmicutes	c__Clostridia	o__Clostridiales	f__Clostridiaceae	g__Clostridium	s__Clostridium saccharoperbutylacetonicum
1775.51	0.0594079	0.0259737	2.28724	0.0221821	0.150616	k__Bacteria	p__Firmicutes	c__Clostridia	o__Clostridiales	f__Eubacteriaceae	g__Eubacterium	s__Eubacterium sp. CAG:115
2.5875	0.0324084	0.0141707	2.28701	0.0221955	0.150616	k__Bacteria	p__Firmicutes	c__Clostridia	o__Thermoanaerobacterales	f__Thermoanaerobacterales Family III. Incertae Sedis	g__Caldicellulosiruptor	s__Caldicellulosiruptor__uc
12.9506	-0.0268975	0.0117704	-2.28518	0.0223022	0.150871	k__Bacteria	p__Bacteroidetes	c__Bacteroidia	o__Bacteroidia__na	f__Bacteroidia__na	g__Bacteroidia__na	s__Bacteroidia bacterium 44-10
73.2944	-0.0461368	0.0201966	-2.28438	0.022349	0.150871	k__Bacteria	p__Bacteroidetes	c__Bacteroidia	o__Bacteroidales	f__Prevotellaceae	g__Prevotella	s__Prevotella sp. tf2-5
41.8161	0.0108049	0.00473612	2.28138	0.0225259	0.15167	k__Bacteria	p__Firmicutes	c__Clostridia	o__Clostridiales	f__Lachnospiraceae	g__Lachnoclostridium	s__Lachnoclostridium phytofermentans
4.78032	-0.0352114	0.0154622	-2.27726	0.0227709	0.152679	k__Bacteria	p__Firmicutes	c__Negativicutes	o__Selenomonadales	f__Selenomonadaceae	g__Selenomonas	s__Selenomonas sputigena
19.5558	-0.0274475	0.0120549	-2.27688	0.0227932	0.152679	k__Bacteria	p__Firmicutes	c__Bacilli	o__Bacillales	f__Staphylococcaceae	g__Staphylococcus	s__Staphylococcus__uc
15.7066	0.0649103	0.0285274	2.27537	0.022884	0.152893	k__Bacteria	p__Tenericutes	c__Mollicutes	o__Mycoplasmatales	f__Mycoplasmataceae	g__Mycoplasma	s__Mycoplasma sp. CAG:956
2.42826	-0.0412855	0.0181869	-2.27006	0.0232039	0.154633	k__Bacteria	p__Fibrobacteres	c__Fibrobacteria	o__Fibrobacterales	f__Fibrobacteraceae	g__Fibrobacter	s__Fibrobacter sp. UWCM
41.8064	0.0420322	0.0185532	2.26549	0.0234825	0.15595	k__Bacteria	p__Proteobacteria	c__Gammaproteobacteria	o__Aeromonadales	f__Succinivibrionaceae	g__Succinivibrio	s__Succinivibrio dextrinosolvens
10.7568	-0.0333152	0.0147096	-2.26486	0.0235215	0.15595	k__Bacteria	p__Firmicutes	c__Clostridia	o__Clostridiales	f__Peptostreptococcaceae	g__Peptostreptococcus	s__Peptostreptococcus stomatis
771.825	-0.0258749	0.0114594	-2.25797	0.0239476	0.158371	k__Bacteria	p__Firmicutes	c__Clostridia	o__Clostridiales	f__Lachnospiraceae	g__Blautia	s__Blautia sp. Marseille-P2398
304.244	-0.0338318	0.0149999	-2.25547	0.0241041	0.158818	k__Bacteria	p__Bacteroidetes	c__Bacteroidia	o__Bacteroidales	f__Porphyromonadaceae	g__Parabacteroides	s__Parabacteroides goldsteinii
90.7008	-0.041503	0.0184054	-2.25493	0.0241374	0.158818	k__Bacteria	p__Bacteria__na	c__Bacteria__na	o__Bacteria__na	f__Bacteria__na	g__Bacteria__na	s__bacterium P201
2.84237	0.0283488	0.0125792	2.25362	0.02422	0.158959	k__Bacteria	p__Firmicutes	c__Clostridia	o__Clostridiales	f__Eubacteriaceae	g__Acetobacterium	s__Acetobacterium__uc
3.13235	0.0565908	0.0251284	2.25207	0.024318	0.1592	k__Bacteria	p__Firmicutes	c__Bacilli	o__Lactobacillales	f__Streptococcaceae	g__Streptococcus	s__Streptococcus sp. CCUG 49591
66.0325	-0.0404261	0.0179658	-2.25017	0.024438	0.15955	k__Bacteria	p__Firmicutes	c__Bacilli	o__Lactobacillales	f__Streptococcaceae	g__Streptococcus	s__Streptococcus equinus
7.16867	0.0402494	0.0178943	2.24929	0.0244942	0.15955	k__Bacteria	p__Bacteroidetes	c__Bacteroidia	o__Bacteroidales	f__Bacteroidales__na	g__Bacteroidales__na	s__Bacteroidales bacterium CF
29.7994	-0.049471	0.022011	-2.24756	0.0246042	0.159866	k__Bacteria	p__Bacteroidetes	c__Bacteroidia	o__Bacteroidales	f__Prevotellaceae	g__Prevotella	s__Prevotella sp. MA2016
50.3398	0.0488017	0.0217441	2.24437	0.0248085	0.160036	k__Bacteria	p__Firmicutes	c__Clostridia	o__Clostridiales	f__Ruminococcaceae	g__Faecalibacterium	s__Faecalibacterium sp. CAG:1138
7889.49	-0.0334014	0.0148825	-2.24433	0.0248109	0.160036	k__Bacteria	p__Firmicutes	c__Clostridia	o__Clostridiales	f__Lachnospiraceae	g__Roseburia	s__Roseburia inulinivorans
5.7843	0.0479329	0.0213579	2.24427	0.0248151	0.160036	k__Bacteria	p__Actinobacteria	c__Actinobacteria	o__Bifidobacteriales	f__Bifidobacteriaceae	g__Bifidobacterium	s__Bifidobacterium gallinarum
3.29536	-0.0655681	0.0292378	-2.24258	0.0249238	0.160339	k__Bacteria	p__Firmicutes	c__Bacilli	o__Lactobacillales	f__Streptococcaceae	g__Streptococcus	s__Streptococcus sp. HMSC074F05
4.19281	0.121879	0.05439	2.24083	0.025037	0.160628	k__Bacteria	p__Firmicutes	c__Bacilli	o__Lactobacillales	f__Lactobacillaceae	g__Lactobacillus	s__Lactobacillus acidophilus
2.29266	-0.0607246	0.0271094	-2.23998	0.0250923	0.160628	k__Bacteria	p__Bacteria__na	c__Bacteria__na	o__Bacteria__na	f__Bacteria__na	g__Bacteria__na	s__uncultured bacterium 1i11
5.04462	-0.039117	0.0174734	-2.23866	0.0251778	0.160779	k__Bacteria	p__Actinobacteria	c__Actinobacteria	o__Actinomycetales	f__Actinomycetaceae	g__Actinomyces	s__Actinomyces israelii
389.84	-0.0337754	0.0151262	-2.23291	0.0255551	0.162788	k__Bacteria	p__Actinobacteria	c__Coriobacteriia	o__Eggerthellales	f__Eggerthellaceae	g__Gordonibacter	s__Gordonibacter pamelaeae
8.03769	0.0239203	0.0107197	2.23144	0.0256518	0.162928	k__Bacteria	p__Firmicutes	c__Negativicutes	o__Veillonellales	f__Veillonellaceae	g__Veillonella	s__Veillonella montpellierensis
17.5078	-0.0257704	0.0115555	-2.23013	0.0257386	0.162928	k__Bacteria	p__Bacteroidetes	c__Flavobacteriia	o__Flavobacteriales	f__Flavobacteriaceae	g__Ornithobacterium	s__Ornithobacterium rhinotracheale
17.3861	0.0198864	0.00891875	2.22973	0.0257651	0.162928	k__Bacteria	p__Firmicutes	c__Clostridia	o__Clostridiales	f__Ruminococcaceae	g__Ruminococcaceae__na	s__Ruminococcaceae bacterium YRB3002
3587.89	-0.0241247	0.0108381	-2.22592	0.0260197	0.163366	k__Bacteria	p__Firmicutes	c__Clostridia	o__Clostridiales	f__Lachnospiraceae	g__Blautia	s__Blautia wexlerae
2.59785	0.0280939	0.0126228	2.22564	0.0260383	0.163366	k__Bacteria	p__Firmicutes	c__Clostridia	o__Clostridiales	f__Clostridiaceae	g__Caloramator	s__Caloramator mitchellensis
76.0105	0.0252771	0.0113584	2.22541	0.0260535	0.163366	k__Bacteria	p__Firmicutes	c__Clostridia	o__Clostridiales	f__Clostridiales__na	g__Clostridiales__na	s__Clostridiales bacterium
36.3935	-0.0220272	0.00990018	-2.22493	0.0260857	0.163366	k__Bacteria	p__Firmicutes	c__Clostridia	o__Clostridiales	f__Clostridiaceae	g__Clostridium	s__Clostridium sp. D5
6.21837	0.0275303	0.0123954	2.22101	0.0263504	0.164627	k__Bacteria	p__Firmicutes	c__Clostridia	o__Clostridiales	f__Ruminococcaceae	g__Anaeromassilibacillus	s__Anaeromassilibacillus__uc
2.10245	-0.0947334	0.0427008	-2.21854	0.026518	0.165277	k__Bacteria	p__Actinobacteria	c__Actinobacteria	o__Actinobacteria__na	f__Actinobacteria__na	g__Actinobacteria__na	s__Actinobacteria bacterium UC5.1-1B11
4.54943	0.0236711	0.0106784	2.21673	0.0266417	0.16541	k__Bacteria	p__Firmicutes	c__Clostridia	o__Clostridiales	f__Peptostreptococcaceae	g__Peptoclostridium	s__Peptoclostridium litorale
20.1803	0.021325	0.00962162	2.21636	0.0266667	0.16541	k__Bacteria	p__Firmicutes	c__Clostridia	o__Clostridia__na	f__Clostridia__na	g__Clostridia__na	s__Clostridia bacterium UC5.1-1E11
4.84075	0.0259847	0.0117357	2.21417	0.0268174	0.165949	k__Bacteria	p__Firmicutes	c__Clostridia	o__Clostridiales	f__Lachnospiraceae	g__Pseudobutyrivibrio	s__Pseudobutyrivibrio sp. NOR37
117.617	-0.0503088	0.022739	-2.21245	0.0269359	0.166286	k__Bacteria	p__Bacteroidetes	c__Bacteroidia	o__Bacteroidales	f__Prevotellaceae	g__Prevotella	s__Prevotella sp. KH2C16
321.82	0.0748479	0.0338618	2.2104	0.0270777	0.166765	k__Bacteria	p__Verrucomicrobia	c__Verrucomicrobiae	o__Verrucomicrobiales	f__Akkermansiaceae	g__Akkermansia	s__Akkermansia muciniphila CAG:154
55.9254	0.0186407	0.0084472	2.20673	0.027333	0.16794	k__Bacteria	p__Firmicutes	c__Clostridia	o__Clostridiales	f__Ruminococcaceae	g__Anaeromassilibacillus	s__Anaeromassilibacillus senegalensis
890.465	0.0562798	0.0255277	2.20466	0.0274782	0.168434	k__Bacteria	p__Actinobacteria	c__Actinobacteria	o__Bifidobacteriales	f__Bifidobacteriaceae	g__Bifidobacterium	s__Bifidobacterium pseudocatenulatum
50.0386	-0.0228718	0.0103857	-2.20224	0.0276482	0.168769	k__Bacteria	p__Firmicutes	c__Clostridia	o__Clostridiales	f__Clostridiaceae	g__Clostridium	s__Clostridium butyricum
2.11642	-0.0680418	0.0308995	-2.20204	0.0276628	0.168769	k__Bacteria	p__Firmicutes	c__Bacilli	o__Bacillales	f__Bacillales__na	g__Exiguobacterium	s__Exiguobacterium sp. Leaf196
236.789	-0.0267254	0.0121722	-2.19561	0.0281197	0.171155	k__Bacteria	p__Bacteroidetes	c__Bacteroidia	o__Bacteroidales	f__Bacteroidaceae	g__Bacteroides	s__Bacteroides pyogenes
3.3498	0.0595481	0.0271981	2.18942	0.0285662	0.173466	k__Bacteria	p__Proteobacteria	c__Betaproteobacteria	o__Burkholderiales	f__Comamonadaceae	g__Comamonadaceae__uc	s__Comamonadaceae__uc
377.14	0.0532724	0.0244035	2.18298	0.0290371	0.175652	k__Bacteria	p__Bacteroidetes	c__Bacteroidia	o__Bacteroidales	f__Bacteroidaceae	g__Bacteroides	s__Bacteroides eggerthii CAG:109
19.4745	-0.0375245	0.0171922	-2.18265	0.0290614	0.175652	k__Bacteria	p__Actinobacteria	c__Coriobacteriia	o__Eggerthellales	f__Eggerthellaceae	g__Eggerthella	s__Eggerthella sp. 1_3_56FAA
102.247	-0.0427858	0.0196167	-2.1811	0.0291763	0.175938	k__Bacteria	p__Bacteroidetes	c__Bacteroidia	o__Bacteroidales	f__Prevotellaceae	g__Prevotella	s__Prevotella brevis
3.48118	-0.0374979	0.0172024	-2.17981	0.0292717	0.176081	k__Bacteria	p__Bacteroidetes	c__Bacteroidia	o__Bacteroidales	f__Porphyromonadaceae	g__Porphyromonas	s__Porphyromonas sp. HMSC065F10
5.2364	-0.059546	0.0273279	-2.17895	0.0293356	0.176081	k__Bacteria	p__Proteobacteria	c__Gammaproteobacteria	o__Enterobacterales	f__Enterobacteriaceae	g__Klebsiella	s__Klebsiella aerogenes
0.748666	0.0767387	0.0352954	2.17418	0.0296916		k__Bacteria	p__Proteobacteria	c__Epsilonproteobacteria	o__Campylobacterales	f__Helicobacteraceae	g__Helicobacter	s__Helicobacter canadensis
4.05932	0.0475565	0.021902	2.17133	0.029906	0.178835	k__Bacteria	p__Firmicutes	c__Bacilli	o__Lactobacillales	f__Streptococcaceae	g__Streptococcus	s__Streptococcus orisratti
346.733	0.0394072	0.0181541	2.1707	0.0299535	0.178835	k__Bacteria	p__Firmicutes	c__Clostridia	o__Clostridiales	f__Lachnospiraceae	g__Roseburia	s__Roseburia sp. CAG:197
37.4193	0.0269513	0.0124203	2.16994	0.0300115	0.178835	k__Bacteria	p__Firmicutes	c__Clostridia	o__Clostridiales	f__Peptostreptococcaceae	g__Criibacterium	s__Criibacterium bergeronii
3.82625	0.0231989	0.0106948	2.16917	0.0300696	0.178835	k__Bacteria	p__Firmicutes	c__Clostridia	o__Clostridiales	f__Clostridiales__na	g__Clostridiales__na	s__Clostridiales bacterium 38-18
229.177	0.0288209	0.0133012	2.16679	0.0302507	0.179167	k__Bacteria	p__Firmicutes	c__Clostridia	o__Clostridiales	f__Ruminococcaceae	g__Ruminococcus	s__Ruminococcus obeum CAG:39
4.07504	-0.0324423	0.0149736	-2.16663	0.0302632	0.179167	k__Bacteria	p__Bacteroidetes	c__Bacteroidia	o__Marinilabiliales	f__Marinilabiliaceae	g__Anaerophaga	s__Anaerophaga thermohalophila
198.211	-0.0403519	0.0186386	-2.16497	0.0303902	0.17951	k__Bacteria	p__Actinobacteria	c__Coriobacteriia	o__Coriobacteriales	f__Atopobiaceae	g__Libanicoccus	s__Libanicoccus massiliensis
4.53439	-0.0532716	0.0246355	-2.16239	0.0305882	0.180269	k__Bacteria	p__Actinobacteria	c__Actinobacteria	o__Micrococcales	f__Microbacteriaceae	g__Leifsonia	s__Leifsonia sp. Leaf336
1.12374	-0.0834825	0.0386434	-2.16033	0.0307473	0.180797	k__Bacteria	p__Proteobacteria	c__Gammaproteobacteria	o__Enterobacterales	f__Enterobacteriaceae	g__Raoultella	s__Raoultella__uc
1056.17	0.0425576	0.0197569	2.15406	0.0312354	0.183253	k__Bacteria	p__Firmicutes	c__Clostridia	o__Clostridiales	f__Clostridiaceae	g__Clostridium	s__Clostridium sp. CAG:62
70.6073	-0.0399844	0.0185756	-2.15253	0.0313559	0.183545	k__Bacteria	p__Bacteroidetes	c__Bacteroidia	o__Bacteroidales	f__Porphyromonadaceae	g__Parabacteroides	s__Parabacteroides johnsonii CAG:246
52.4978	-0.0253035	0.0117786	-2.14826	0.0316928	0.184733	k__Bacteria	p__Bacteroidetes	c__Bacteroidia	o__Bacteroidales	f__Bacteroidaceae	g__Bacteroides	s__Bacteroides paurosaccharolyticus
4.14674	-0.0354608	0.0165075	-2.14816	0.031701	0.184733	k__Bacteria	p__Bacteroidetes	c__Bacteroidetes__na	o__Bacteroidetes__na	f__Bacteroidetes__na	g__Bacteroidetes__na	s__Bacteroidetes oral taxon 274
29.6645	-0.0439091	0.0204535	-2.14678	0.0318107	0.184948	k__Bacteria	p__Bacteroidetes	c__Bacteroidia	o__Bacteroidales	f__Prevotellaceae	g__Prevotella	s__Prevotella fusca
2378.76	-0.0318506	0.0148425	-2.14591	0.0318803	0.184948	k__Bacteria	p__Bacteroidetes	c__Bacteroidia	o__Bacteroidales	f__Bacteroidaceae	g__Bacteroidaceae__uc	s__Bacteroidaceae__uc
946.148	-0.0186009	0.00867457	-2.14431	0.0320082	0.185034	k__Bacteria	p__Firmicutes	c__Clostridia	o__Clostridiales	f__Lachnospiraceae	g__Lachnoclostridium	s__[Clostridium] clostridioforme
2.29407	0.0351795	0.0164088	2.14394	0.0320375	0.185034	k__Bacteria	p__Bacteria__na	c__Bacteria__na	o__Bacteria__na	f__Bacteria__na	g__Bacteria__na	s__uncultured bacterium Ad_125_D08
91966.4	-0.0144171	0.00672892	-2.14256	0.0321483	0.185263	k__Bacteria	p__Bacteria__uc	c__Bacteria__uc	o__Bacteria__uc	f__Bacteria__uc	g__Bacteria__uc	s__Bacteria__uc
308.097	-0.0392905	0.0183594	-2.14007	0.032349	0.185813	k__Bacteria	p__Bacteroidetes	c__Bacteroidia	o__Bacteroidales	f__Bacteroidaceae	g__Mediterranea	s__Mediterranea massiliensis
3.36661	-0.0351219	0.0164151	-2.1396	0.0323868	0.185813	k__Bacteria	p__Bacteroidetes	c__Bacteroidia	o__Bacteroidales	f__Porphyromonadaceae	g__Dysgonomonas	s__Dysgonomonas mossii
3.48448	-0.0238708	0.0111788	-2.13537	0.0327309	0.186908	k__Bacteria	p__Proteobacteria	c__Betaproteobacteria	o__Burkholderiales	f__Burkholderiaceae	g__Ralstonia	s__Ralstonia pickettii
2.34833	-0.0839749	0.0393293	-2.13517	0.032747	0.186908	k__Bacteria	p__Proteobacteria	c__Gammaproteobacteria	o__Enterobacterales	f__Enterobacteriaceae	g__Raoultella	s__Raoultella ornithinolytica
8.17612	-0.0851349	0.0398832	-2.1346	0.0327934	0.186908	k__Bacteria	p__Proteobacteria	c__Gammaproteobacteria	o__Enterobacterales	f__Enterobacteriaceae	g__Shigella	s__Shigella boydii
5.40558	-0.0420681	0.0197542	-2.12958	0.0332067	0.18885	k__Bacteria	p__Actinobacteria	c__Actinobacteria	o__Bifidobacteriales	f__Bifidobacteriaceae	g__Bifidobacterium	s__Bifidobacterium cuniculi
29.4938	-0.0482298	0.0226629	-2.12814	0.0333259	0.189113	k__Bacteria	p__Bacteroidetes	c__Bacteroidia	o__Bacteroidales	f__Prevotellaceae	g__Prevotella	s__Prevotella multiformis
2.45602	-0.0495452	0.023301	-2.12631	0.0334772	0.189149	k__Bacteria	p__Firmicutes	c__Bacilli	o__Lactobacillales	f__Streptococcaceae	g__Lactococcus	s__Lactococcus raffinolactis
2.8365	0.123415	0.0580418	2.12631	0.0334776	0.189149	k__Bacteria	p__Bacteria__na	c__Bacteria__na	o__Bacteria__na	f__Bacteria__na	g__Bacteria__na	s__Melainabacteria sp. 35_41
912.692	-0.0512764	0.0241256	-2.12539	0.0335538	0.189168	k__Bacteria	p__Proteobacteria	c__Betaproteobacteria	o__Burkholderiales	f__Sutterellaceae	g__Sutterella	s__Sutterella wadsworthensis
19.2131	-0.0505659	0.0238472	-2.12041	0.0339716	0.191109	k__Bacteria	p__Bacteroidetes	c__Bacteroidia	o__Bacteroidales	f__Prevotellaceae	g__Prevotella	s__Prevotella sp. oral taxon 306
1.86466	-0.0525387	0.0247977	-2.11869	0.0341168	0.191511	k__Bacteria	p__Proteobacteria	c__Gammaproteobacteria	o__Pseudomonadales	f__Pseudomonadaceae	g__Pseudomonas	s__Pseudomonas savastanoi
8.34673	0.0602707	0.0284818	2.11611	0.0343352	0.192322	k__Bacteria	p__Firmicutes	c__Bacilli	o__Lactobacillales	f__Lactobacillaceae	g__Lactobacillus	s__Lactobacillus paracasei
9.87915	-0.0234594	0.011098	-2.11384	0.0345288	0.192908	k__Bacteria	p__Bacteroidetes	c__Bacteroidia	o__Bacteroidales	f__Porphyromonadaceae	g__Porphyromonas	s__Porphyromonas macacae
3.36655	0.0234977	0.0111198	2.11315	0.0345883	0.192908	k__Bacteria	p__Firmicutes	c__Clostridia	o__Clostridiales	f__Clostridiaceae	g__Alkaliphilus	s__Alkaliphilus transvaalensis
7.20751	-0.0147669	0.0069984	-2.11004	0.0348553	0.193981	k__Bacteria	p__Firmicutes	c__Clostridia	o__Clostridiales	f__Lachnospiraceae	g__Butyrivibrio	s__Butyrivibrio sp. VCD2006
7.83897	0.0209378	0.00994818	2.10468	0.035319	0.196141	k__Bacteria	p__Firmicutes	c__Clostridia	o__Clostridiales	f__Ruminococcaceae	g__Pseudobacteroides	s__Pseudobacteroides cellulosolvens
41.3037	-0.0329507	0.015669	-2.10292	0.0354732	0.196511	k__Bacteria	p__Actinobacteria	c__Actinobacteria	o__Actinomycetales	f__Actinomycetaceae	g__Actinomyces	s__Actinomyces sp. ICM47
2.21383	-0.0370432	0.0176212	-2.10219	0.0355368	0.196511	k__Bacteria	p__Firmicutes	c__Negativicutes	o__Selenomonadales	f__Selenomonadaceae	g__Propionispira	s__Propionispira arboris
102.174	-0.0542341	0.0258391	-2.09892	0.0358242	0.197679	k__Bacteria	p__Bacteroidetes	c__Bacteroidia	o__Bacteroidales	f__Prevotellaceae	g__Prevotella	s__Prevotella sp. P5-60
4.07826	0.0223489	0.0106628	2.09596	0.0360857	0.198365	k__Bacteria	p__Actinobacteria	c__Actinobacteria	o__Streptomycetales	f__Streptomycetaceae	g__Streptomyces	s__Streptomyces__uc
1.52626	-0.0452549	0.0215933	-2.09579	0.0361011	0.198365	k__Bacteria	p__Bacteroidetes	c__Bacteroidia	o__Bacteroidales	f__Bacteroidales__na	g__Bacteroidales__na	s__Bacteroidales bacterium Barb4
7.09154	-0.0228029	0.010891	-2.09374	0.0362836	0.198735	k__Bacteria	p__Proteobacteria	c__Gammaproteobacteria	o__Pseudomonadales	f__Pseudomonadaceae	g__Pseudomonas	s__Pseudomonas__uc
42.3667	-0.0174639	0.00834273	-2.09331	0.0363214	0.198735	k__Bacteria	p__Firmicutes	c__Clostridia	o__Clostridiales	f__Clostridiales__na	g__Clostridiales__na	s__Clostridiales bacterium VE202-16
31.0252	-0.0447249	0.0215605	-2.07439	0.0380428	0.207717	k__Bacteria	p__Bacteroidetes	c__Bacteroidia	o__Bacteroidales	f__Prevotellaceae	g__Prevotella	s__Prevotella micans
5.99905	-0.0494242	0.0238825	-2.06948	0.0385012	0.209772	k__Bacteria	p__Firmicutes	c__Bacilli	o__Lactobacillales	f__Streptococcaceae	g__Streptococcus	s__Streptococcus devriesei
101.282	0.02598	0.0125599	2.06848	0.0385951	0.209772	k__Bacteria	p__Firmicutes	c__Firmicutes__na	o__Firmicutes__na	f__Firmicutes__na	g__Firmicutes__na	s__Firmicutes bacterium CAG:534
2.9544	0.0226615	0.0109594	2.06777	0.0386614	0.209772	k__Bacteria	p__Firmicutes	c__Clostridia	o__Clostridiales	f__Clostridiales__na	g__Gottschalkia	s__[Eubacterium] angustum
3.33301	0.0224209	0.0108502	2.0664	0.0387904	0.209811	k__Bacteria	p__Firmicutes	c__Clostridia	o__Clostridiales	f__Peptococcaceae	g__Desulfitobacterium	s__Desulfitobacterium metallireducens
29.376	0.0430098	0.0208181	2.06598	0.03883	0.209811	k__Bacteria	p__Proteobacteria	c__Deltaproteobacteria	o__Myxococcales	f__Myxococcaceae	g__Corallococcus	s__Corallococcus sp. CAG:1435
820.766	0.0516746	0.0250629	2.06179	0.0392274	0.211007	k__Bacteria	p__Firmicutes	c__Clostridia	o__Clostridiales	f__Lachnospiraceae	g__Roseburia	s__Roseburia sp. CAG:45
14.2695	-0.0483894	0.0234725	-2.06154	0.0392517	0.211007	k__Bacteria	p__Bacteroidetes	c__Bacteroidia	o__Bacteroidales	f__Prevotellaceae	g__Prevotella	s__Prevotella sp. BP1-145
3.57078	0.0316568	0.0153593	2.06109	0.0392948	0.211007	k__Bacteria	p__Firmicutes	c__Bacilli	o__Lactobacillales	f__Enterococcaceae	g__Enterococcus	s__Enterococcus mundtii
3271.97	-0.0336905	0.0163584	-2.05953	0.0394437	0.211199	k__Bacteria	p__Bacteroidetes	c__Bacteroidia	o__Bacteroidales	f__Bacteroidaceae	g__Bacteroides	s__Bacteroides dorei
104.034	0.0192479	0.00934814	2.05901	0.0394932	0.211199	k__Bacteria	p__Firmicutes	c__Clostridia	o__Clostridiales	f__Eubacteriaceae	g__Eubacteriaceae__na	s__Eubacteriaceae bacterium CHKCI005
5.15579	-0.0229361	0.0111455	-2.05787	0.0396024	0.211348	k__Bacteria	p__Actinobacteria	c__Coriobacteriia	o__Coriobacteriales	f__Atopobiaceae	g__Atopobium	s__Atopobium sp. oral taxon 810
3.74498	-0.0540114	0.0262597	-2.05682	0.0397036	0.21145	k__Bacteria	p__Bacteria__na	c__Bacteria__na	o__Bacteria__na	f__Bacteria__na	g__Bacteria__na	s__uncultured bacterium 25H09
14.518	0.0628555	0.030572	2.05598	0.0397841	0.21145	k__Bacteria	p__Bacteria__na	c__Bacteria__na	o__Bacteria__na	f__Bacteria__na	g__Bacteria__na	s__uncultured bacterium Lq_025_E06
3.06168	0.0207727	0.0101089	2.0549	0.0398887	0.211527	k__Bacteria	p__Spirochaetes	c__Spirochaetia	o__Spirochaetales	f__Spirochaetaceae	g__Treponema	s__Treponema sp. CETP13
93.9789	-0.0303346	0.0147675	-2.05415	0.0399614	0.211527	k__Bacteria	p__Actinobacteria	c__Coriobacteriia	o__Coriobacteriales	f__Atopobiaceae	g__Olsenella	s__Olsenella sp. Marseille-P2912
1.06286	-0.0640823	0.0312646	-2.04968	0.0403959	0.212832	k__Bacteria	p__Bacteroidetes	c__Flavobacteriia	o__Flavobacteriales	f__Flavobacteriaceae	g__Empedobacter	s__Empedobacter falsenii
122.773	-0.0212208	0.0103537	-2.04958	0.0404059	0.212832	k__Bacteria	p__Firmicutes	c__Bacilli	o__Bacilli__uc	f__Bacilli__uc	g__Bacilli__uc	s__Bacilli__uc
9.72365	0.0331492	0.016182	2.04852	0.0405088	0.212832	k__Bacteria	p__Firmicutes	c__Clostridia	o__Clostridiales	f__Eubacteriaceae	g__Eubacterium	s__Eubacterium callanderi
12.2566	-0.0317328	0.0154936	-2.04812	0.0405483	0.212832	k__Bacteria	p__Bacteroidetes	c__Bacteroidia	o__Bacteroidales	f__Porphyromonadaceae	g__Porphyromonas	s__Porphyromonas gulae
2.19557	0.0266271	0.0130052	2.04741	0.0406174	0.212832	k__Bacteria	p__Elusimicrobia	c__Elusimicrobia__uc	o__Elusimicrobia__uc	f__Elusimicrobia__uc	g__Elusimicrobia__uc	s__Elusimicrobia__uc
6527.72	-0.0308281	0.0150772	-2.04468	0.0408869	0.213813	k__Bacteria	p__Firmicutes	c__Clostridia	o__Clostridiales	f__Lachnospiraceae	g__Roseburia	s__Roseburia intestinalis
783.013	-0.0386733	0.0189396	-2.04193	0.0411586	0.214472	k__Bacteria	p__Bacteroidetes	c__Bacteroidia	o__Bacteroidales	f__Prevotellaceae	g__Prevotella	s__Prevotella sp. KHD1
163.084	0.0203915	0.00998733	2.04173	0.0411779	0.214472	k__Bacteria	p__Firmicutes	c__Clostridia	o__Clostridiales	f__Eubacteriaceae	g__Eubacteriaceae__na	s__Eubacteriaceae bacterium CHKCI004
297.096	0.0440849	0.021626	2.03851	0.0414992	0.215713	k__Bacteria	p__Firmicutes	c__Clostridia	o__Clostridiales	f__Eubacteriaceae	g__Eubacterium	s__Eubacterium siraeum CAG:80
53.0111	-0.0230992	0.0113416	-2.03668	0.0416822	0.216231	k__Bacteria	p__Bacteroidetes	c__Bacteroidia	o__Bacteroidales	f__Bacteroidaceae	g__Bacteroides	s__Bacteroides graminisolvens
880.392	-0.0222428	0.0109276	-2.03547	0.0418033	0.216428	k__Bacteria	p__Firmicutes	c__Clostridia	o__Clostridiales	f__Lachnospiraceae	g__Blautia	s__[Ruminococcus] gnavus
1.71754	-0.0377644	0.018584	-2.0321	0.0421439	0.217351	k__Bacteria	p__Firmicutes	c__Negativicutes	o__Selenomonadales	f__Selenomonadaceae	g__Propionispira	s__Propionispira raffinosivorans
939.994	-0.0304181	0.0149692	-2.03205	0.0421489	0.217351	k__Bacteria	p__Bacteroidetes	c__Bacteroidia	o__Bacteroidales	f__Odoribacteraceae	g__Butyricimonas	s__Butyricimonas__uc
28.8198	0.012293	0.00605799	2.02922	0.0424355	0.218396	k__Bacteria	p__Firmicutes	c__Clostridia	o__Clostridiales	f__Lachnospiraceae	g__Lachnospiraceae__na	s__Lachnospiraceae bacterium G11
99.1821	-0.0218778	0.0107869	-2.02818	0.0425422	0.218447	k__Bacteria	p__Firmicutes	c__Clostridia	o__Clostridiales	f__Lachnospiraceae	g__Lachnoclostridium	s__[Clostridium] lavalense
30.2112	-0.0417786	0.0206062	-2.02748	0.0426135	0.218447	k__Bacteria	p__Bacteroidetes	c__Bacteroidia	o__Bacteroidales	f__Prevotellaceae	g__Prevotella	s__Prevotella shahii
12.1911	-0.0271273	0.0134194	-2.02149	0.0432289	0.221165	k__Bacteria	p__Bacteroidetes	c__Bacteroidia	o__Bacteroidales	f__Porphyromonadaceae	g__Dysgonomonas	s__Dysgonomonas capnocytophagoides
15.589	-0.0365828	0.018126	-2.01825	0.043565	0.222447	k__Bacteria	p__Firmicutes	c__Negativicutes	o__Acidaminococcales	f__Acidaminococcaceae	g__Acidaminococcaceae__uc	s__Acidaminococcaceae__uc
16.0602	0.0110495	0.00547936	2.01656	0.043741	0.222617	k__Bacteria	p__Firmicutes	c__Clostridia	o__Clostridiales	f__Lachnospiraceae	g__Parasporobacterium	s__Parasporobacterium paucivorans
165.209	-0.0110595	0.00548505	-2.01629	0.0437696	0.222617	k__Bacteria	p__Firmicutes	c__Clostridia	o__Clostridiales	f__Lachnospiraceae	g__Lachnoclostridium	s__[Clostridium] saccharolyticum
120.7	0.0171994	0.00854328	2.0132	0.0440932	0.223825	k__Bacteria	p__Firmicutes	c__Clostridia	o__Clostridiales	f__Ruminococcaceae	g__Ruminiclostridium	s__Ruminiclostridium sp. KB18
863.482	0.0262023	0.0130341	2.01029	0.0444004	0.224945	k__Bacteria	p__Firmicutes	c__Clostridia	o__Clostridiales	f__Lachnospiraceae	g__Blautia	s__Blautia sp. CAG:37_48_57
156.277	0.0289976	0.0144389	2.0083	0.0446118	0.225576	k__Bacteria	p__Bacteroidetes	c__Bacteroidia	o__Bacteroidales	f__Bacteroidaceae	g__Bacteroides	s__Bacteroides sp. 4_1_36
122.142	-0.030229	0.0150856	-2.00384	0.0450876	0.22714	k__Bacteria	p__Firmicutes	c__Bacilli	o__Lactobacillales	f__Enterococcaceae	g__Enterococcus	s__Enterococcus faecalis
10.7946	0.0199231	0.00994823	2.00268	0.0452122	0.22714	k__Bacteria	p__Firmicutes	c__Clostridia	o__Clostridiales	f__Ruminococcaceae	g__Ruminiclostridium	s__Ruminiclostridium thermocellum
1272.22	0.0344228	0.0171923	2.00222	0.0452608	0.22714	k__Bacteria	p__Firmicutes	c__Clostridia	o__Clostridiales	f__Lachnospiraceae	g__Roseburia	s__uncultured Roseburia sp.
4.03489	0.0267432	0.013359	2.00188	0.0452975	0.22714	k__Bacteria	p__Firmicutes	c__Clostridia	o__Clostridiales	f__Clostridiales__na	g__Proteiniborus	s__Proteiniborus sp. DW1
8.69539	0.0549809	0.0274757	2.00107	0.0453846	0.22714	k__Bacteria	p__Firmicutes	c__Clostridia	o__Clostridiales	f__Clostridiaceae	g__Clostridium	s__Clostridium sp. CAG_433_25_7
6.35058	-0.0500048	0.0249969	-2.00044	0.0454524	0.22714	k__Bacteria	p__Firmicutes	c__Bacilli	o__Bacillales	f__Bacillales__na	g__Gemella	s__Gemella haemolysans
238.86	-0.026751	0.0133775	-1.9997	0.0455329	0.22714	k__Bacteria	p__Firmicutes	c__Clostridia	o__Clostridiales	f__Lachnospiraceae	g__Tyzzerella	s__Tyzzerella sp. Marseille-P3062
589.695	-0.0180984	0.00908211	-1.99275	0.046289	0.230383	k__Bacteria	p__Bacteroidetes	c__Bacteroidia	o__Bacteroidales	f__Bacteroidales__na	g__Bacteroidales__na	s__Bacteroidales bacterium 43_8
430.929	0.0403227	0.020276	1.98868	0.046736	0.230383	k__Bacteria	p__Firmicutes	c__Firmicutes__na	o__Firmicutes__na	f__Firmicutes__na	g__Firmicutes__na	s__Firmicutes bacterium CAG:240
7.76693	-0.0731127	0.0367658	-1.98861	0.0467448	0.230383	k__Bacteria	p__Bacteroidetes	c__Flavobacteriia	o__Flavobacteriales	f__Flavobacteriaceae	g__Capnocytophaga	s__Capnocytophaga granulosa
11.3427	-0.0200896	0.0101055	-1.98798	0.0468137	0.230383	k__Bacteria	p__Bacteroidetes	c__Flavobacteriia	o__Flavobacteriales	f__Flavobacteriaceae	g__Flavobacteriaceae__uc	s__Flavobacteriaceae__uc
42.8154	0.0430426	0.0216557	1.98759	0.0468569	0.230383	k__Bacteria	p__Firmicutes	c__Negativicutes	o__Selenomonadales	f__Selenomonadaceae	g__Megamonas	s__Megamonas hypermegale
3.3042	-0.023123	0.011637	-1.98702	0.0469203	0.230383	k__Bacteria	p__Firmicutes	c__Bacilli	o__Lactobacillales	f__Enterococcaceae	g__Enterococcus	s__Enterococcus pallens
1.361	-0.0457294	0.0230245	-1.98612	0.0470195	0.230383	k__Bacteria	p__Proteobacteria	c__Epsilonproteobacteria	o__Campylobacterales	f__Campylobacteraceae	g__Campylobacter	s__Campylobacter gracilis
2205.23	-0.0360615	0.0181582	-1.98597	0.047037	0.230383	k__Bacteria	p__Bacteroidetes	c__Bacteroidia	o__Bacteroidales	f__Rikenellaceae	g__Alistipes	s__Alistipes finegoldii
26.1925	0.0203838	0.0102655	1.98567	0.04707	0.230383	k__Bacteria	p__Firmicutes	c__Erysipelotrichia	o__Erysipelotrichales	f__Erysipelotrichaceae	g__Erysipelotrichaceae__na	s__Erysipelotrichaceae bacterium 5_2_54FAA
392.445	-0.0355466	0.0179017	-1.98566	0.0470712	0.230383	k__Bacteria	p__Proteobacteria	c__Deltaproteobacteria	o__Desulfovibrionales	f__Desulfovibrionaceae	g__Bilophila	s__Bilophila sp. 4_1_30
11789.1	-0.0286274	0.0144302	-1.98385	0.0472724	0.230383	k__Bacteria	p__Firmicutes	c__Clostridia	o__Clostridiales	f__Lachnospiraceae	g__Lachnospiraceae__na	s__[Eubacterium] rectale
42.9998	0.015522	0.00782618	1.98334	0.0473293	0.230383	k__Bacteria	p__Firmicutes	c__Clostridia	o__Clostridiales	f__Ruminococcaceae	g__Papillibacter	s__Papillibacter cinnamivorans
27.2532	-0.0336589	0.0169821	-1.98202	0.0474768	0.230383	k__Bacteria	p__Actinobacteria	c__Actinobacteria	o__Micrococcales	f__Micrococcaceae	g__Rothia	s__Rothia__uc
11.6721	0.099635	0.0502797	1.98162	0.0475223	0.230383	k__Bacteria	p__Proteobacteria	c__Gammaproteobacteria	o__Pasteurellales	f__Pasteurellaceae	g__Haemophilus	s__Haemophilus pittmaniae
1066.57	0.0500911	0.0252859	1.98099	0.0475923	0.230383	k__Bacteria	p__Proteobacteria	c__Betaproteobacteria	o__Burkholderiales	f__Sutterellaceae	g__Sutterellaceae__uc	s__Sutterellaceae__uc
6.37878	0.0358689	0.0181073	1.98091	0.0476012	0.230383	k__Bacteria	p__Firmicutes	c__Firmicutes__na	o__Firmicutes__na	f__Firmicutes__na	g__Firmicutes__na	s__Firmicutes bacterium CAG:631
23.152	-0.0204913	0.0103646	-1.97704	0.0480373	0.232061	k__Bacteria	p__Firmicutes	c__Erysipelotrichia	o__Erysipelotrichales	f__Erysipelotrichaceae	g__Faecalibaculum	s__Faecalibaculum rodentium
2.63033	0.0349484	0.0176937	1.97519	0.0482463	0.232221	k__Bacteria	p__Spirochaetes	c__Spirochaetia	o__Spirochaetia__na	f__Leptospiraceae	g__Leptonema	s__Leptonema illini
0.800881	-0.0996427	0.0504477	-1.97517	0.0482491	0.232221	k__Bacteria	p__Proteobacteria	c__Gammaproteobacteria	o__Enterobacterales	f__Enterobacteriaceae	g__Raoultella	s__Raoultella planticola
9.23617	-0.0202589	0.0102788	-1.97093	0.0487314	0.234109	k__Bacteria	p__Bacteroidetes	c__Bacteroidia	o__Bacteroidales	f__Porphyromonadaceae	g__Dysgonomonas	s__Dysgonomonas macrotermitis
15.3539	0.0163681	0.00831522	1.96845	0.0490158	0.234729	k__Bacteria	p__Spirochaetes	c__Spirochaetia	o__Spirochaetales	f__Spirochaetaceae	g__Treponema	s__Treponema bryantii
2.13135	-0.0361187	0.0183508	-1.96823	0.0490411	0.234729	k__Bacteria	p__Bacteria__na	c__Bacteria__na	o__Bacteria__na	f__Bacteria__na	g__Bacteria__na	s__uncultured murine large bowel bacterium BAC 31B
33.0229	-0.0397312	0.0201994	-1.96695	0.0491891	0.235005	k__Bacteria	p__Firmicutes	c__Clostridia	o__Clostridiales	f__Lachnospiraceae	g__Lachnospiraceae__na	s__Lachnospiraceae bacterium CAG:364
351.954	-0.0375037	0.0190911	-1.96446	0.0494763	0.235943	k__Bacteria	p__Firmicutes	c__Clostridia	o__Clostridiales	f__Lachnospiraceae	g__Roseburia	s__Roseburia intestinalis CAG:13
67.7889	0.0461178	0.0235575	1.95767	0.0502685	0.238984	k__Bacteria	p__Firmicutes	c__Negativicutes	o__Veillonellales	f__Veillonellaceae	g__Veillonella	s__Veillonella parvula
139	-0.0390966	0.0199735	-1.95742	0.0502979	0.238984	k__Bacteria	p__Bacteroidetes	c__Bacteroidia	o__Bacteroidales	f__Prevotellaceae	g__Prevotella	s__Prevotella buccalis
2.28413	-0.0566136	0.0289482	-1.95569	0.0505018	0.239149	k__Bacteria	p__Bacteroidetes	c__Bacteroidia	o__Bacteroidales	f__Porphyromonadaceae	g__Porphyromonas	s__Porphyromonas sp. CAG:1061
101.67	-0.0358567	0.0183357	-1.95556	0.0505166	0.239149	k__Bacteria	p__Bacteroidetes	c__Bacteroidia	o__Bacteroidales	f__Porphyromonadaceae	g__Tannerella	s__Tannerella sp. CAG:118
572.806	-0.0330657	0.016919	-1.95435	0.0506603	0.239393	k__Bacteria	p__Firmicutes	c__Clostridia	o__Clostridiales	f__Eubacteriaceae	g__Eubacterium	s__Eubacterium sp. 41_20
62.3552	-0.0241383	0.0123584	-1.9532	0.0507963	0.2396	k__Bacteria	p__Firmicutes	c__Clostridia	o__Clostridiales	f__Lachnospiraceae	g__Coprococcus	s__Coprococcus sp. 43_8
47631.3	-0.0171629	0.00879966	-1.9504	0.0511279	0.240515	k__Bacteria	p__Firmicutes	c__Clostridia	o__Clostridiales	f__Ruminococcaceae	g__Faecalibacterium	s__Faecalibacterium__uc
3.53612	0.0815592	0.0418251	1.95001	0.0511753	0.240515	k__Bacteria	p__Verrucomicrobia	c__Verrucomicrobiae	o__Verrucomicrobiales	f__Akkermansiaceae	g__Akkermansia	s__uncultured Akkermansia sp. SMG25
22.0498	-0.0406643	0.0208653	-1.9489	0.0513077	0.24055	k__Bacteria	p__Bacteroidetes	c__Bacteroidia	o__Bacteroidales	f__Prevotellaceae	g__Prevotella	s__Prevotella sp. HJM029
654.287	0.0395578	0.0203028	1.94839	0.051368	0.24055	k__Bacteria	p__Firmicutes	c__Clostridia	o__Clostridiales	f__Clostridiaceae	g__Clostridium	s__Clostridium sp. CAG:62_40_43
3.12944	0.023299	0.0120102	1.93993	0.0523886	0.244522	k__Bacteria	p__Firmicutes	c__Clostridia	o__Clostridiales	f__Clostridiaceae	g__Paramaledivibacter	s__Paramaledivibacter caminithermalis
26.0827	-0.0175308	0.0090402	-1.9392	0.0524766	0.244522	k__Bacteria	p__Fibrobacteres	c__Fibrobacteria	o__Fibrobacterales	f__Fibrobacteraceae	g__Fibrobacter	s__Fibrobacter__uc
57.8372	-0.0140843	0.00726698	-1.93813	0.0526073	0.244522	k__Bacteria	p__Firmicutes	c__Clostridia	o__Clostridiales	f__Lachnospiraceae	g__Lachnoanaerobaculum	s__Lachnoanaerobaculum saburreum
14.1203	-0.02029	0.0104728	-1.93741	0.0526957	0.244522	k__Bacteria	p__Firmicutes	c__Bacilli	o__Lactobacillales	f__Streptococcaceae	g__Streptococcus	s__Streptococcus pasteurianus
20.3977	-0.0179696	0.00927636	-1.93714	0.0527282	0.244522	k__Bacteria	p__Proteobacteria	c__Betaproteobacteria	o__Burkholderiales	f__Burkholderiaceae	g__Burkholderiaceae__uc	s__Burkholderiaceae__uc
6.95007	-0.065154	0.0336416	-1.93671	0.0527807	0.244522	k__Bacteria	p__Firmicutes	c__Bacilli	o__Lactobacillales	f__Leuconostocaceae	g__Leuconostoc	s__Leuconostoc gelidum
1.48461	0.0310368	0.016039	1.93509	0.0529795	0.244652	k__Bacteria	p__Bacteria__na	c__Bacteria__na	o__Bacteria__na	f__Bacteria__na	g__Bacteria__na	s__uncultured bacterium Contig1762
9.19836	-0.0292955	0.0151402	-1.93495	0.052997	0.244652	k__Bacteria	p__Firmicutes	c__Clostridia	o__Clostridiales	f__Clostridiaceae	g__Clostridium	s__Clostridium sp. Marseille-P2414
40.6621	-0.0465864	0.0241174	-1.93165	0.0534026	0.246087	k__Bacteria	p__Bacteroidetes	c__Bacteroidia	o__Bacteroidales	f__Prevotellaceae	g__Prevotella	s__Prevotella dentasini
92.9995	-0.0358681	0.0185827	-1.93019	0.0535838	0.246485	k__Bacteria	p__Bacteroidetes	c__Bacteroidia	o__Bacteroidales	f__Rikenellaceae	g__Alistipes	s__Alistipes sp. CAG:831
29.1028	-0.0336523	0.0174432	-1.92925	0.0536995	0.246581	k__Bacteria	p__Firmicutes	c__Bacilli	o__Lactobacillales	f__Streptococcaceae	g__Streptococcus	s__Streptococcus sp. 263_SSPC
27.7176	-0.0215081	0.0111663	-1.92617	0.0540837	0.247908	k__Bacteria	p__Firmicutes	c__Clostridia	o__Clostridiales	f__Eubacteriaceae	g__Eubacterium	s__Eubacterium sp. SB2
44.2	-0.0390442	0.0202923	-1.92409	0.0543435	0.248225	k__Bacteria	p__Bacteroidetes	c__Bacteroidia	o__Bacteroidales	f__Prevotellaceae	g__Prevotella	s__Prevotella nigrescens
9.63234	0.0174395	0.00906378	1.92409	0.0543439	0.248225	k__Bacteria	p__Firmicutes	c__Clostridia	o__Clostridiales	f__Ruminococcaceae	g__Ruminiclostridium	s__[Clostridium] clariflavum
4.67485	0.0207898	0.0108186	1.92167	0.0546474	0.249173	k__Bacteria	p__Firmicutes	c__Clostridia	o__Clostridiales	f__Peptococcaceae	g__Desulfosporosinus	s__Desulfosporosinus__uc
4.46166	0.0223359	0.0116476	1.91765	0.055156	0.251051	k__Bacteria	p__Firmicutes	c__Clostridia	o__Clostridiales	f__Peptococcaceae	g__Desulfosporosinus	s__Desulfosporosinus sp. OL
663.211	-0.0233279	0.0121801	-1.91525	0.0554608	0.251997	k__Bacteria	p__Firmicutes	c__Clostridia	o__Clostridiales	f__Ruminococcaceae	g__Ruminococcus	s__Ruminococcus sp. 5_1_39BFAA
15.0603	0.0149005	0.00778659	1.91361	0.05567	0.252071	k__Bacteria	p__Firmicutes	c__Clostridia	o__Clostridiales	f__Clostridiaceae	g__Clostridium	s__Clostridium argentinense
5.39931	-0.0404035	0.0211138	-1.9136	0.0556709	0.252071	k__Bacteria	p__Proteobacteria	c__Alphaproteobacteria	o__Rhizobiales	f__Phyllobacteriaceae	g__Mesorhizobium	s__Mesorhizobium__uc
27.3679	0.0241478	0.0126247	1.91274	0.0557816	0.252133	k__Bacteria	p__Firmicutes	c__Clostridia	o__Clostridiales	f__Christensenellaceae	g__Christensenella	s__Christensenella timonensis
19.2182	0.0117086	0.00612528	1.91151	0.0559387	0.252404	k__Bacteria	p__Firmicutes	c__Clostridia	o__Clostridiales	f__Lachnospiraceae	g__Lachnospiraceae__na	s__Lachnospiraceae bacterium P6B14
0.731678	-0.0746755	0.0390827	-1.91071	0.0560423		k__Bacteria	p__Bacteroidetes	c__Flavobacteriia	o__Flavobacteriales	f__Flavobacteriaceae	g__Capnocytophaga	s__Capnocytophaga gingivalis
5.50141	0.0190348	0.00999454	1.90452	0.0568423	0.255741	k__Bacteria	p__Firmicutes	c__Clostridia	o__Clostridiales	f__Clostridiales Family XII. Incertae Sedis	g__Fusibacter	s__Fusibacter sp. 3D3
8.20334	-0.0313434	0.0164603	-1.90419	0.0568857	0.255741	k__Bacteria	p__Firmicutes	c__Bacilli	o__Lactobacillales	f__Lactobacillaceae	g__Lactobacillus	s__Lactobacillus jensenii
8.18253	-0.0243672	0.0128011	-1.90351	0.0569735	0.255741	k__Bacteria	p__Bacteroidetes	c__Bacteroidia	o__Bacteroidales	f__Bacteroidales__na	g__Bacteroidales__na	s__Bacteroidales bacterium 45-6
1.58003	-0.0338837	0.0178323	-1.90013	0.0574162	0.256727	k__Bacteria	p__Firmicutes	c__Tissierellia	o__Tissierellales	f__Peptoniphilaceae	g__Peptoniphilus	s__Peptoniphilus sp. KHD2
1.15308	0.0430778	0.0226725	1.9	0.0574325	0.256727	k__Bacteria	p__Proteobacteria	c__Deltaproteobacteria	o__Desulfuromonadales	f__Desulfuromonadaceae	g__Pelobacter	s__Pelobacter seleniigenes
1.33233	-0.0610883	0.0321699	-1.89893	0.0575738	0.256727	k__Bacteria	p__Firmicutes	c__Bacilli	o__Lactobacillales	f__Leuconostocaceae	g__Leuconostoc	s__Leuconostoc lactis
187.627	-0.0258405	0.0136087	-1.89882	0.0575881	0.256727	k__Bacteria	p__Bacteroidetes	c__Bacteroidia	o__Bacteroidales	f__Bacteroidaceae	g__Bacteroides	s__Bacteroides caecimuris
6.11578	0.0211608	0.0111573	1.89658	0.0578831	0.2576	k__Bacteria	p__Firmicutes	c__Clostridia	o__Clostridiales	f__Ruminococcaceae	g__Anaerotruncus	s__Anaerotruncus__uc
38.501	0.00929196	0.00490546	1.89421	0.0581974	0.258441	k__Bacteria	p__Firmicutes	c__Clostridia	o__Clostridiales	f__Clostridiaceae	g__Sarcina	s__Sarcina sp. DSM 11001
5.31167	0.0212727	0.0112337	1.89365	0.0582711	0.258441	k__Bacteria	p__Spirochaetes	c__Spirochaetia	o__Spirochaetales	f__Spirochaetaceae	g__Treponema	s__Treponema vincentii
0.613386	0.0628533	0.0332079	1.89272	0.0583946		k__Bacteria	p__Proteobacteria	c__Betaproteobacteria	o__Burkholderiales	f__Comamonadaceae	g__Acidovorax	s__Acidovorax__uc
234.496	-0.0341629	0.018076	-1.88996	0.0587639	0.260183	k__Bacteria	p__Firmicutes	c__Clostridia	o__Clostridiales	f__Lachnospiraceae	g__Roseburia	s__Roseburia inulinivorans CAG:15
264.729	-0.0169272	0.00896264	-1.88864	0.0589405	0.260413	k__Bacteria	p__Firmicutes	c__Clostridia	o__Clostridiales	f__Clostridiaceae	g__Clostridiaceae__uc	s__Clostridiaceae__uc
162.021	-0.0179057	0.00948359	-1.88807	0.0590163	0.260413	k__Bacteria	p__Firmicutes	c__Clostridia	o__Clostridiales	f__Ruminococcaceae	g__Phocea	s__Phocea massiliensis
2.08028	-0.0507431	0.0268931	-1.88685	0.0591811	0.260601	k__Bacteria	p__Bacteroidetes	c__Flavobacteriia	o__Flavobacteriales	f__Flavobacteriaceae	g__Capnocytophaga	s__Capnocytophaga canimorsus
6.39984	0.0517425	0.0274409	1.8856	0.0593492	0.260601	k__Bacteria	p__Firmicutes	c__Negativicutes	o__Veillonellales	f__Veillonellaceae	g__Veillonella	s__Veillonella sp. 3_1_44
3.52153	0.0192589	0.0102141	1.88552	0.0593597	0.260601	k__Bacteria	p__Firmicutes	c__Tissierellia	o__Tissierellales	f__Peptoniphilaceae	g__Lagierella	s__Lagierella massiliensis
2.6311	0.0223745	0.0118798	1.8834	0.0596463	0.26112	k__Bacteria	p__Firmicutes	c__Clostridia	o__Clostridiales	f__Peptococcaceae	g__Desulfotomaculum	s__Desulfotomaculum arcticum
4.06972	-0.0345974	0.0183825	-1.88208	0.0598245	0.26112	k__Bacteria	p__Bacteroidetes	c__Bacteroidia	o__Bacteroidales	f__Porphyromonadaceae	g__Proteiniphilum	s__Proteiniphilum saccharofermentans
4.58185	-0.107713	0.0572425	-1.88169	0.0598781	0.26112	k__Bacteria	p__Firmicutes	c__Bacilli	o__Bacillales	f__Staphylococcaceae	g__Staphylococcus	s__Staphylococcus xylosus
794.885	0.0373001	0.0198228	1.88168	0.0598797	0.26112	k__Bacteria	p__Firmicutes	c__Firmicutes__na	o__Firmicutes__na	f__Firmicutes__na	g__Firmicutes__na	s__Firmicutes bacterium CAG:137
8.01119	-0.0172211	0.00915763	-1.88052	0.0600376	0.261246	k__Bacteria	p__Firmicutes	c__Clostridia	o__Clostridiales	f__Lachnospiraceae	g__Lachnospiraceae__na	s__Lachnospiraceae bacterium KH1T2
59.2598	-0.0368094	0.0195796	-1.87999	0.0601097	0.261246	k__Bacteria	p__Bacteroidetes	c__Bacteroidia	o__Bacteroidales	f__Prevotellaceae	g__Prevotella	s__Prevotella sp. ne3005
3.31953	-0.0431165	0.0229707	-1.87702	0.0605151	0.262432	k__Bacteria	p__Bacteroidetes	c__Bacteroidia	o__Bacteroidales	f__Prevotellaceae	g__Prevotella	s__Prevotella aff. ruminicola Tc2-24
4.95301	-0.0339957	0.0181164	-1.87652	0.0605844	0.262432	k__Bacteria	p__Bacteroidetes	c__Bacteroidia	o__Bacteroidales	f__Porphyromonadaceae	g__Porphyromonadaceae__na	s__Porphyromonadaceae bacterium KH3CP3RA
1.80682	0.0350777	0.018728	1.87301	0.0610676	0.264084	k__Bacteria	p__Bacteria__na	c__Bacteria__na	o__Bacteria__na	f__Bacteria__na	g__Bacteria__na	s__uncultured bacterium Contig1480
0.8505	-0.100535	0.0537302	-1.8711	0.0613309	0.264783	k__Bacteria	p__Bacteroidetes	c__Flavobacteriia	o__Flavobacteriales	f__Flavobacteriaceae	g__Chryseobacterium	s__Chryseobacterium sp. ERMR1:04
52.4432	-0.0241731	0.0129302	-1.86951	0.0615524	0.264974	k__Bacteria	p__Actinobacteria	c__Coriobacteriia	o__Eggerthellales	f__Eggerthellaceae	g__Gordonibacter	s__Gordonibacter__uc
8.24079	0.0233062	0.0124678	1.86931	0.0615791	0.264974	k__Bacteria	p__Firmicutes	c__Clostridia	o__Clostridiales	f__Lachnospiraceae	g__Blautia	s__Blautia hydrogenotrophica CAG:147
50.6614	0.0309108	0.0165478	1.86797	0.0617669	0.265342	k__Bacteria	p__Actinobacteria	c__Actinobacteria	o__Bifidobacteriales	f__Bifidobacteriaceae	g__Bifidobacterium	s__Bifidobacterium sp. 56_9_plus
9.48518	0.0148976	0.00798058	1.86674	0.0619385	0.265641	k__Bacteria	p__Firmicutes	c__Clostridia	o__Clostridiales	f__Ruminococcaceae	g__Ruminiclostridium	s__[Clostridium] hungatei
21.7353	0.0109656	0.00587831	1.86543	0.0621214	0.265986	k__Bacteria	p__Firmicutes	c__Clostridia	o__Clostridiales	f__Lachnospiraceae	g__Tyzzerella	s__[Clostridium] propionicum
193.232	-0.0297297	0.0159536	-1.86351	0.0623903	0.266582	k__Bacteria	p__Bacteroidetes	c__Bacteroidia	o__Bacteroidales	f__Bacteroidaceae	g__Bacteroides	s__Bacteroides sp. CAG:462
34.8718	0.0200377	0.0107557	1.86298	0.0624657	0.266582	k__Bacteria	p__Firmicutes	c__Clostridia	o__Clostridiales	f__Ruminococcaceae	g__Ruminococcus	s__Ruminococcus sp. NK3A76
8.40994	-0.0218968	0.0117857	-1.85792	0.0631808	0.269191	k__Bacteria	p__Bacteroidetes	c__Bacteroidia	o__Bacteroidales	f__Porphyromonadaceae	g__Paludibacter	s__Paludibacter jiangxiensis
9.57903	0.0148891	0.00802942	1.85432	0.0636927	0.270929	k__Bacteria	p__Firmicutes	c__Clostridia	o__Clostridiales	f__Ruminococcaceae	g__Acetivibrio	s__Acetivibrio cellulolyticus
6.77271	-0.020029	0.0108065	-1.85342	0.0638223	0.270987	k__Bacteria	p__Firmicutes	c__Negativicutes	o__Selenomonadales	f__Sporomusaceae	g__Anaerosporomusa	s__Anaerosporomusa subterranea
12.9841	0.0513928	0.0277383	1.85277	0.063915	0.270987	k__Bacteria	p__Lentisphaerae	c__Lentisphaerae__na	o__Lentisphaerae__na	f__Lentisphaerae__na	g__Lentisphaerae__na	s__Lentisphaerae bacterium GWF2_45_14
6.48107	-0.0242166	0.0130815	-1.8512	0.0641402	0.271499	k__Bacteria	p__Bacteroidetes	c__Bacteroidetes__na	o__Bacteroidetes__na	f__Bacteroidetes__na	g__Bacteroidetes__na	s__Bacteroidetes bacterium oral taxon 272
7.11276	0.0223617	0.0120906	1.84951	0.0643846	0.271639	k__Bacteria	p__Firmicutes	c__Tissierellia	o__Tissierellales	f__Peptoniphilaceae	g__Murdochiella	s__Murdochiella sp. Marseille-P2341
117.498	-0.0371689	0.0200975	-1.84943	0.064396	0.271639	k__Bacteria	p__Bacteroidetes	c__Bacteroidia	o__Bacteroidales	f__Prevotellaceae	g__Prevotella	s__Prevotella baroniae
3415.29	0.0451182	0.0244109	1.84828	0.0645614	0.271639	k__Bacteria	p__Firmicutes	c__Firmicutes__na	o__Firmicutes__na	f__Firmicutes__na	g__Firmicutes__na	s__Firmicutes bacterium CAG:227
102.059	-0.0233731	0.0126491	-1.84781	0.0646298	0.271639	k__Bacteria	p__Firmicutes	c__Clostridia	o__Clostridiales	f__Lachnospiraceae	g__Blautia	s__Blautia hansenii
91.1087	0.0495003	0.0268038	1.84677	0.0647811	0.271639	k__Bacteria	p__Proteobacteria	c__Betaproteobacteria	o__Burkholderiales	f__Oxalobacteraceae	g__Oxalobacter	s__Oxalobacter formigenes
6.80893	0.0154257	0.00835341	1.84663	0.0648005	0.271639	k__Bacteria	p__Firmicutes	c__Clostridia	o__Clostridiales	f__Clostridiaceae	g__Clostridium	s__Clostridium sp. N3C
46.3776	0.0306536	0.0166318	1.84307	0.0653187	0.273254	k__Bacteria	p__Firmicutes	c__Clostridia	o__Clostridiales	f__Clostridiales__na	g__Clostridiales__na	s__Clostridiales bacterium VE202-01
37.9419	-0.0389434	0.0211357	-1.84254	0.0653959	0.273254	k__Bacteria	p__Bacteroidetes	c__Bacteroidia	o__Bacteroidales	f__Prevotellaceae	g__Prevotellaceae__na	s__Prevotellaceae bacterium HUN156
10.9491	0.0127793	0.00693948	1.84154	0.0655424	0.273426	k__Bacteria	p__Firmicutes	c__Bacilli	o__Bacillales	f__Bacillaceae	g__Bacillaceae__uc	s__Bacillaceae__uc
93.5161	0.0381697	0.0207569	1.83889	0.0659318	0.274064	k__Bacteria	p__Firmicutes	c__Clostridia	o__Clostridiales	f__Ruminococcaceae	g__Ruminococcus	s__Ruminococcus sp. CAG:488
1.39435	-0.141487	0.0769739	-1.83812	0.0660442	0.274064	k__Bacteria	p__Fusobacteria	c__Fusobacteriia	o__Fusobacteriales	f__Fusobacteriaceae	g__Fusobacteriaceae__uc	s__Fusobacteriaceae__uc
40.9359	-0.042026	0.0228641	-1.83808	0.0660509	0.274064	k__Bacteria	p__Bacteroidetes	c__Bacteroidia	o__Bacteroidales	f__Prevotellaceae	g__Prevotella	s__Prevotella pleuritidis
2.8832	0.0233888	0.0127295	1.83737	0.0661559	0.274064	k__Bacteria	p__Firmicutes	c__Clostridia	o__Clostridiales	f__Clostridiaceae	g__Clostridium	s__Clostridium tepidiprofundi
636.45	-0.0321776	0.0175185	-1.83678	0.0662423	0.274064	k__Bacteria	p__Firmicutes	c__Clostridia	o__Clostridiales	f__Eubacteriaceae	g__Eubacterium	s__Eubacterium rectale CAG:36
3.33658	-0.0388379	0.0211512	-1.8362	0.0663279	0.274064	k__Bacteria	p__Firmicutes	c__Negativicutes	o__Selenomonadales	f__Selenomonadaceae	g__Selenomonas	s__Selenomonas infelix
126.947	-0.0202007	0.0110109	-1.8346	0.0665643	0.274281	k__Bacteria	p__Bacteroidetes	c__Bacteroidia	o__Bacteroidales	f__Porphyromonadaceae	g__Barnesiella	s__Barnesiella viscericola
16.8647	-0.0417381	0.0227528	-1.83442	0.0665914	0.274281	k__Bacteria	p__Bacteroidetes	c__Bacteroidia	o__Bacteroidales	f__Porphyromonadaceae	g__Parabacteroides	s__Parabacteroides sp. D25
32.9042	-0.0166027	0.00905722	-1.83309	0.0667899	0.274663	k__Bacteria	p__Firmicutes	c__Clostridia	o__Clostridiales	f__Clostridiales__na	g__Clostridiales__na	s__Clostridiales bacterium VE202-09
12.1528	-0.0306021	0.0167109	-1.83127	0.067061	0.275342	k__Bacteria	p__Actinobacteria	c__Actinobacteria	o__Actinomycetales	f__Actinomycetaceae	g__Actinomyces	s__Actinomyces graevenitzii
517.073	0.0413977	0.0226245	1.82977	0.0672843	0.275823	k__Bacteria	p__Firmicutes	c__Negativicutes	o__Veillonellales	f__Veillonellaceae	g__Veillonella	s__Veillonella__uc
8.48535	-0.0428714	0.0234479	-1.82836	0.067495	0.276095	k__Bacteria	p__Firmicutes	c__Bacilli	o__Lactobacillales	f__Streptococcaceae	g__Streptococcus	s__Streptococcus sp. HMSC073D05
1314.32	-0.0301607	0.0165016	-1.82775	0.0675875	0.276095	k__Bacteria	p__Firmicutes	c__Clostridia	o__Clostridiales	f__Clostridiaceae	g__Clostridium	s__Clostridium sp. CAG:58
76.4504	-0.0174269	0.00953848	-1.82701	0.0676977	0.276095	k__Bacteria	p__Firmicutes	c__Clostridia	o__Clostridiales	f__Lachnospiraceae	g__Lachnoclostridium	s__[Eubacterium] contortum
1.7356	-0.0531717	0.0291113	-1.8265	0.0677757	0.276095	k__Bacteria	p__Bacteroidetes	c__Bacteroidia	o__Bacteroidales	f__Porphyromonadaceae	g__Porphyromonas	s__Porphyromonas sp. oral taxon 279
8.23147	0.0234073	0.0128293	1.82452	0.0680742	0.276534	k__Bacteria	p__Firmicutes	c__Bacilli	o__Lactobacillales	f__Enterococcaceae	g__Enterococcus	s__Enterococcus columbae
132.451	0.038275	0.0209799	1.82437	0.0680961	0.276534	k__Bacteria	p__Firmicutes	c__Clostridia	o__Clostridiales	f__Clostridiaceae	g__Clostridium	s__Clostridium sp. CAG:122
2.56013	0.135133	0.0742568	1.81981	0.0687881	0.278908	k__Bacteria	p__Firmicutes	c__Bacilli	o__Lactobacillales	f__Lactobacillaceae	g__Lactobacillus	s__Lactobacillus frumenti
3.35405	0.0242545	0.0133381	1.81843	0.0689981	0.278976	k__Bacteria	p__Firmicutes	c__Bacilli	o__Bacillales	f__Listeriaceae	g__Listeria	s__Listeria__uc
1652.09	-0.0288049	0.0158422	-1.81824	0.0690279	0.278976	k__Bacteria	p__Firmicutes	c__Clostridia	o__Clostridiales	f__Lachnospiraceae	g__Dorea	s__Dorea sp. CAG:105
223.516	0.0254605	0.0140078	1.81759	0.0691267	0.278976	k__Bacteria	p__Firmicutes	c__Clostridia	o__Clostridiales	f__Ruminococcaceae	g__Ruminococcus	s__Ruminococcus champanellensis
4.05645	0.0236902	0.013053	1.81492	0.0695355	0.279759	k__Bacteria	p__Firmicutes	c__Clostridia	o__Clostridiales	f__Clostridiaceae	g__Fervidicella	s__Fervidicella metallireducens
28.0028	0.0230268	0.0126875	1.81492	0.069536	0.279759	k__Bacteria	p__Bacteria__na	c__Bacteria__na	o__Bacteria__na	f__Bacteria__na	g__Bacteria__na	s__Candidatus Melainabacteria bacterium LEY3_CP_29_8
209.294	0.0319556	0.0176196	1.81364	0.0697325	0.280115	k__Bacteria	p__Firmicutes	c__Clostridia	o__Clostridiales	f__Clostridiaceae	g__Clostridium	s__Clostridium sp. CAG:12237_41
8.47836	-0.0432246	0.0238555	-1.81193	0.0699964	0.280273	k__Bacteria	p__Bacteroidetes	c__Bacteroidia	o__Bacteroidales	f__Prevotellaceae	g__Prevotella	s__Prevotella sp. ICM33
1.22247	-0.0649647	0.0358694	-1.81115	0.0701184	0.280273	k__Bacteria	p__Firmicutes	c__Bacilli	o__Lactobacillales	f__Streptococcaceae	g__Streptococcus	s__Streptococcus sp. 2_1_36FAA
5.26493	-0.0279655	0.0154427	-1.81092	0.0701531	0.280273	k__Bacteria	p__Firmicutes	c__Negativicutes	o__Selenomonadales	f__Selenomonadaceae	g__Propionispira	s__Propionispira__uc
149.552	-0.0145667	0.00804526	-1.8106	0.0702031	0.280273	k__Bacteria	p__Firmicutes	c__Clostridia	o__Clostridiales	f__Clostridiales__na	g__Clostridiales__na	s__Clostridiales bacterium VE202-03
27.5418	0.0348652	0.0192679	1.8095	0.0703741	0.280525	k__Bacteria	p__Actinobacteria	c__Actinobacteria	o__Bifidobacteriales	f__Bifidobacteriaceae	g__Bifidobacterium	s__Bifidobacterium merycicum
33.1735	-0.0368042	0.0203757	-1.80628	0.0708745	0.282087	k__Bacteria	p__Bacteroidetes	c__Bacteroidia	o__Bacteroidales	f__Prevotellaceae	g__Prevotella	s__Prevotella oulorum
602.615	0.0449188	0.0248894	1.80474	0.0711156	0.282614	k__Bacteria	p__Bacteroidetes	c__Bacteroidia	o__Bacteroidales	f__Prevotellaceae	g__Prevotella	s__Prevotella sp. CAG:891
58.5841	-0.0134709	0.00747853	-1.80128	0.0716594	0.284228	k__Bacteria	p__Firmicutes	c__Clostridia	o__Clostridiales	f__Lachnospiraceae	g__Lachnoclostridium	s__Lachnoclostridium sp. YL32
145.953	0.0192589	0.0106949	1.80076	0.0717405	0.284228	k__Bacteria	p__Firmicutes	c__Clostridia	o__Clostridiales	f__Ruminococcaceae	g__Massilimaliae	s__Massilimaliae massiliensis
0.933407	0.0633554	0.03523	1.79834	0.0721234	0.284899	k__Bacteria	p__Actinobacteria	c__Actinobacteria	o__Bifidobacteriales	f__Bifidobacteriaceae	g__Alloscardovia	s__Alloscardovia sp. HMSC034E08
63.9504	-0.0388956	0.0216354	-1.79777	0.0722132	0.284899	k__Bacteria	p__Bacteroidetes	c__Bacteroidia	o__Bacteroidales	f__Prevotellaceae	g__Prevotella	s__Prevotella saccharolytica
28.4256	-0.0102597	0.0057101	-1.79676	0.0723736	0.284899	k__Bacteria	p__Firmicutes	c__Clostridia	o__Clostridiales	f__Clostridiaceae	g__Clostridium	s__Clostridium sp. ASF356
9.6916	-0.0158644	0.00882958	-1.79673	0.0723784	0.284899	k__Bacteria	p__Firmicutes	c__Clostridia	o__Clostridiales	f__Clostridiaceae	g__Beduini	s__Beduini massiliensis
3.49742	-0.0786237	0.0437715	-1.79623	0.0724581	0.284899	k__Bacteria	p__Proteobacteria	c__Gammaproteobacteria	o__Enterobacterales	f__Enterobacteriaceae	g__Shigella	s__Shigella sp. SF-2015
285.979	-0.0140306	0.00782073	-1.79403	0.0728085	0.285845	k__Bacteria	p__Firmicutes	c__Clostridia	o__Clostridiales	f__Clostridiales__na	g__Clostridiales__na	s__butyrate-producing bacterium SS3/4
3.8464	0.0192122	0.0107148	1.79306	0.0729633	0.286021	k__Bacteria	p__Firmicutes	c__Clostridia	o__Clostridiales	f__Lachnospiraceae	g__Butyrivibrio	s__Butyrivibrio sp. Su6
685.051	-0.0180546	0.0100758	-1.79188	0.0731526	0.286187	k__Bacteria	p__Bacteroidetes	c__Bacteroidia	o__Bacteroidales	f__Odoribacteraceae	g__Odoribacter	s__Odoribacter splanchnicus
151.297	-0.0456709	0.0254943	-1.79142	0.0732261	0.286187	k__Bacteria	p__Proteobacteria	c__Alphaproteobacteria	o__Rhizobiales	f__Rhizobiaceae	g__Sinorhizobium	s__Sinorhizobium sp. GL28
25.1204	0.0239242	0.0134102	1.78403	0.0744188	0.290412	k__Bacteria	p__Synergistetes	c__Synergistia	o__Synergistales	f__Synergistaceae	g__Synergistes	s__Synergistes jonesii
616.409	-0.0430977	0.0241823	-1.7822	0.0747162	0.291135	k__Bacteria	p__Bacteroidetes	c__Bacteroidia	o__Bacteroidales	f__Bacteroidaceae	g__Bacteroides	s__Bacteroides stercoris CAG:120
106.085	0.0173644	0.0097568	1.77972	0.0751215	0.292276	k__Bacteria	p__Firmicutes	c__Clostridia	o__Clostridiales	f__Clostridiaceae	g__Clostridium	s__Clostridium sp. CAG:678
149.685	-0.0151264	0.00851259	-1.77695	0.0755771	0.293382	k__Bacteria	p__Firmicutes	c__Clostridia	o__Clostridiales	f__Lachnospiraceae	g__Lachnoclostridium	s__[Clostridium] asparagiforme
2.56413	-0.0642015	0.036137	-1.77662	0.0756315	0.293382	k__Bacteria	p__Firmicutes	c__Bacilli	o__Lactobacillales	f__Streptococcaceae	g__Streptococcus	s__Streptococcus thermophilus CAG:236
3.70948	0.0250109	0.0140999	1.77384	0.0760896	0.29472	k__Bacteria	p__Firmicutes	c__Clostridia	o__Clostridiales	f__Peptococcaceae	g__Desulfotomaculum	s__Desulfotomaculum__uc
10.9328	-0.0277308	0.0156771	-1.76887	0.0769157	0.296564	k__Bacteria	p__Firmicutes	c__Negativicutes	o__Selenomonadales	f__Selenomonadaceae	g__Mitsuokella	s__Mitsuokella sp. oral taxon 131
9.94319	-0.049955	0.028246	-1.76857	0.0769657	0.296564	k__Bacteria	p__Bacteria__na	c__Bacteria__na	o__Bacteria__na	f__Bacteria__na	g__Bacteria__na	s__uncultured bacterium 32o03
2.92848	0.0218821	0.0123751	1.76823	0.0770218	0.296564	k__Bacteria	p__Firmicutes	c__Clostridia	o__Clostridiales	f__Syntrophomonadaceae	g__Syntrophomonas	s__Syntrophomonas zehnderi
75.7571	0.0456007	0.0257891	1.76822	0.0770246	0.296564	k__Bacteria	p__Actinobacteria	c__Actinobacteria	o__Bifidobacteriales	f__Bifidobacteriaceae	g__Bifidobacterium	s__Bifidobacterium pseudocatenulatum CAG:263
3.0994	0.0206334	0.0116734	1.76755	0.0771363	0.296564	k__Bacteria	p__Firmicutes	c__Clostridia	o__Clostridiales	f__Clostridiaceae	g__Alkaliphilus	s__Alkaliphilus peptidifermentans
2.05855	0.024752	0.0140255	1.76478	0.0776007	0.297909	k__Bacteria	p__Firmicutes	c__Clostridia	o__Clostridiales	f__Clostridiales Family XVI. Incertae Sedis	g__Carboxydocella	s__Carboxydocella__uc
67.7858	-0.0403068	0.0228736	-1.76216	0.0780425	0.298639	k__Bacteria	p__Bacteroidetes	c__Bacteroidia	o__Bacteroidales	f__Prevotellaceae	g__Prevotella	s__Prevotella veroralis
9.11258	-0.0537582	0.0305134	-1.76179	0.0781048	0.298639	k__Bacteria	p__Bacteroidetes	c__Bacteroidia	o__Bacteroidales	f__Prevotellaceae	g__Prevotella	s__Prevotella sp. HMSC069G02
69.1009	0.0107954	0.00612813	1.76161	0.0781356	0.298639	k__Bacteria	p__Firmicutes	c__Clostridia	o__Clostridiales	f__Clostridiaceae	g__Clostridium	s__Clostridium sp. SY8519
44.879	-0.0190342	0.0108406	-1.75582	0.0791189	0.301953	k__Bacteria	p__Firmicutes	c__Erysipelotrichia	o__Erysipelotrichales	f__Erysipelotrichaceae	g__Erysipelotrichaceae__na	s__Erysipelotrichaceae bacterium 2_2_44A
10.4998	0.0126944	0.00724086	1.75316	0.0795753	0.30325	k__Bacteria	p__Firmicutes	c__Clostridia	o__Clostridiales	f__Clostridiaceae	g__Clostridium	s__Clostridium cellulovorans
1.11565	-0.0760562	0.0435259	-1.74738	0.0805716	0.306597	k__Bacteria	p__Proteobacteria	c__Gammaproteobacteria	o__Pseudomonadales	f__Moraxellaceae	g__Acinetobacter	s__Acinetobacter pittii
35.2052	0.0291762	0.016713	1.74572	0.0808593	0.307242	k__Bacteria	p__Bacteroidetes	c__Bacteroidia	o__Bacteroidales	f__Porphyromonadaceae	g__Sanguibacteroides	s__Sanguibacteroides justesenii
117.328	0.0411009	0.0235613	1.74443	0.0810843	0.307647	k__Bacteria	p__Firmicutes	c__Clostridia	o__Clostridiales	f__Clostridiaceae	g__Clostridium	s__Clostridium sp. CAG:265
3466.01	0.0145203	0.00833792	1.74148	0.0815998	0.309152	k__Bacteria	p__Firmicutes	c__Clostridia	o__Clostridiales	f__Clostridiales__na	g__Clostridiales__na	s__Clostridiales bacterium 52_15
9.59279	-0.0201438	0.011587	-1.73849	0.0821243	0.310685	k__Bacteria	p__Firmicutes	c__Clostridia	o__Clostridiales	f__Lachnospiraceae	g__Robinsoniella	s__Robinsoniella sp. RHS
21.8535	-0.0229412	0.0132029	-1.73758	0.0822843	0.310825	k__Bacteria	p__Firmicutes	c__Clostridia	o__Clostridiales	f__Lachnospiraceae	g__Oribacterium	s__Oribacterium sp. NK2B42
45.7592	0.0406749	0.0234177	1.73693	0.0824002	0.310825	k__Bacteria	p__Firmicutes	c__Clostridia	o__Clostridiales	f__Clostridiaceae	g__Clostridium	s__Clostridium sp. CAG:575
717.176	-0.0158035	0.00913635	-1.72974	0.0836773	0.314922	k__Bacteria	p__Firmicutes	c__Clostridia	o__Clostridiales	f__Clostridiaceae	g__Hungatella	s__Hungatella hathewayi
10.789	0.0218243	0.0126192	1.72945	0.0837288	0.314922	k__Bacteria	p__Firmicutes	c__Clostridia	o__Clostridiales	f__Eubacteriaceae	g__Eubacterium	s__Eubacterium barkeri
274.531	-0.0239273	0.0138494	-1.72767	0.0840471	0.315436	k__Bacteria	p__Firmicutes	c__Clostridia	o__Clostridiales	f__Lachnospiraceae	g__Lachnoclostridium	s__[Clostridium] scindens
114.543	-0.0220396	0.0127594	-1.72733	0.084108	0.315436	k__Bacteria	p__Firmicutes	c__Clostridia	o__Clostridiales	f__Lachnospiraceae	g__Coprococcus	s__Coprococcus sp. HPP0074
3.92099	0.0255796	0.0148611	1.72125	0.0852058	0.319092	k__Bacteria	p__Actinobacteria	c__Actinobacteria	o__Actinomycetales	f__Actinomycetaceae	g__Varibaculum	s__Varibaculum cambriense
48.6341	0.0142959	0.00831995	1.71826	0.0857488	0.320664	k__Bacteria	p__Firmicutes	c__Clostridia	o__Clostridiales	f__Eubacteriaceae	g__Eubacterium	s__Eubacterium pyruvativorans
18.1288	0.02807	0.0163516	1.71666	0.0860415	0.321296	k__Bacteria	p__Firmicutes	c__Clostridia	o__Clostridiales	f__Peptostreptococcaceae	g__Romboutsia	s__Romboutsia lituseburensis
4.68895	0.0188486	0.0109872	1.71551	0.0862526	0.321622	k__Bacteria	p__Firmicutes	c__Clostridia	o__Clostridiales	f__Ruminococcaceae	g__Ruminiclostridium	s__[Clostridium] cellulolyticum
3.14104	0.0249048	0.0145255	1.71456	0.0864256	0.321805	k__Bacteria	p__Spirochaetes	c__Spirochaetia	o__Spirochaetales	f__Spirochaetaceae	g__Treponema	s__Treponema putidum
56.3021	-0.0412006	0.024048	-1.71327	0.0866636	0.32223	k__Bacteria	p__Proteobacteria	c__Betaproteobacteria	o__Burkholderiales	f__Sutterellaceae	g__Parasutterella	s__Parasutterella__uc
15.4299	-0.0236842	0.0138585	-1.709	0.087451	0.324059	k__Bacteria	p__Bacteroidetes	c__Bacteroidia	o__Bacteroidales	f__Porphyromonadaceae	g__Dysgonomonas	s__Dysgonomonas sp. BGC7
5.08541	0.0149216	0.00873286	1.70868	0.0875111	0.324059	k__Bacteria	p__Firmicutes	c__Clostridia	o__Clostridiales	f__Eubacteriaceae	g__Garciella	s__Garciella nitratireducens
5540.05	-0.017089	0.0100057	-1.70793	0.0876499	0.324059	k__Bacteria	p__Firmicutes	c__Clostridia	o__Clostridiales	f__Clostridiaceae	g__Butyricicoccus	s__uncultured Butyricicoccus sp.
2.67293	0.053043	0.0310574	1.7079	0.0876542	0.324059	k__Bacteria	p__Bacteroidetes	c__Bacteroidia	o__Bacteroidales	f__Porphyromonadaceae	g__Porphyromonadaceae__na	s__Porphyromonadaceae bacterium KHP3R9
3.05327	0.0181776	0.0106657	1.70431	0.0883239	0.326071	k__Bacteria	p__Firmicutes	c__Clostridia	o__Clostridiales	f__Lachnospiraceae	g__Lachnospiraceae__na	s__Lachnospiraceae bacterium A10
191.966	0.0357215	0.0209939	1.70152	0.0888452	0.32753	k__Bacteria	p__Actinobacteria	c__Coriobacteriia	o__Eggerthellales	f__Eggerthellaceae	g__Eggerthella	s__Eggerthella sp. CAG:368
4.99057	-0.0183596	0.0108057	-1.69907	0.089306	0.328762	k__Bacteria	p__Firmicutes	c__Clostridia	o__Clostridiales	f__Lachnospiraceae	g__Lachnospiraceae__na	s__Lachnospiraceae bacterium NC2008
330.102	0.0258871	0.0152525	1.69724	0.0896515	0.328853	k__Bacteria	p__Firmicutes	c__Clostridia	o__Clostridiales	f__Lachnospiraceae	g__Lachnospiraceae__na	s__Lachnospiraceae bacterium 5_1_63FAA
30.9333	0.0092329	0.00544197	1.69661	0.0897701	0.328853	k__Bacteria	p__Firmicutes	c__Clostridia	o__Clostridiales	f__Eubacteriaceae	g__Eubacterium	s__Eubacterium oxidoreducens
33.1469	-0.022931	0.0135185	-1.69626	0.0898359	0.328853	k__Bacteria	p__Firmicutes	c__Clostridia	o__Clostridiales	f__Ruminococcaceae	g__Ruminococcus	s__Ruminococcus sp. CAG:55
1246.76	0.0208976	0.0123221	1.69595	0.089896	0.328853	k__Bacteria	p__Firmicutes	c__Firmicutes__na	o__Firmicutes__na	f__Firmicutes__na	g__Firmicutes__na	s__Firmicutes bacterium CAG:24053_14
960.041	-0.0202847	0.0119666	-1.69512	0.0900532	0.328853	k__Bacteria	p__Firmicutes	c__Clostridia	o__Clostridiales	f__Lachnospiraceae	g__Blautia	s__Blautia sp. Marseille-P3087
11.8988	0.0139526	0.00823295	1.69473	0.090127	0.328853	k__Bacteria	p__Firmicutes	c__Clostridia	o__Clostridiales	f__Lachnospiraceae	g__Lachnospiraceae__na	s__Lachnospiraceae bacterium AC2031
5.52736	-0.0247274	0.0145948	-1.69426	0.0902162	0.328853	k__Bacteria	p__Bacteroidetes	c__Bacteroidia	o__Marinilabiliales	f__Prolixibacteraceae	g__Mariniphaga	s__Mariniphaga anaerophila
10.1623	-0.0133322	0.00787614	-1.69273	0.0905064	0.329448	k__Bacteria	p__Firmicutes	c__Clostridia	o__Clostridiales	f__Lachnospiraceae	g__Lachnoclostridium	s__[Desulfotomaculum] guttoideum
2.65576	-0.0573254	0.0338931	-1.69136	0.0907683	0.329709	k__Bacteria	p__Firmicutes	c__Bacilli	o__Lactobacillales	f__Streptococcaceae	g__Streptococcus	s__Streptococcus sp. HSISS1
130.318	0.0297387	0.0175862	1.69103	0.0908318	0.329709	k__Bacteria	p__Firmicutes	c__Clostridia	o__Clostridiales	f__Clostridiaceae	g__Clostridium	s__Clostridium sp. CAG:448
4.10077	0.0195786	0.0116099	1.68637	0.0917239	0.33243	k__Bacteria	p__Firmicutes	c__Clostridia	o__Clostridiales	f__Clostridiaceae	g__Geosporobacter	s__Geosporobacter subterraneus
4.22998	0.0495264	0.0293812	1.68565	0.0918639	0.33243	k__Bacteria	p__Lentisphaerae	c__Lentisphaerae__na	o__Lentisphaerae__na	f__Lentisphaerae__na	g__Lentisphaerae__na	s__Lentisphaerae bacterium GWF2_49_21
1.75561	0.0828085	0.0491409	1.68512	0.0919651	0.33243	k__Bacteria	p__Firmicutes	c__Bacilli	o__Bacillales	f__Paenibacillaceae	g__Paenibacillus	s__Paenibacillus tyrfis
26.2734	-0.0243528	0.0144666	-1.68338	0.092301	0.333181	k__Bacteria	p__Actinobacteria	c__Actinobacteria	o__Actinomycetales	f__Actinomycetaceae	g__Actinomyces	s__Actinomyces sp. oral taxon 172
10.1684	-0.0151606	0.00901081	-1.68249	0.0924746	0.333345	k__Bacteria	p__Actinobacteria	c__Coriobacteriia	o__Coriobacteriales	f__Coriobacteriaceae	g__Coriobacterium	s__Coriobacterium glomerans
312.65	0.0384048	0.0228449	1.68111	0.0927413	0.333843	k__Bacteria	p__Actinobacteria	c__Actinobacteria	o__Bifidobacteriales	f__Bifidobacteriaceae	g__Bifidobacterium	s__Bifidobacterium catenulatum
5.94133	-0.0231525	0.0137776	-1.68044	0.0928713	0.333849	k__Bacteria	p__Actinobacteria	c__Coriobacteriia	o__Coriobacteriales	f__Atopobiaceae	g__Atopobium	s__Atopobium parvulum
3.54161	0.0222521	0.0132495	1.67946	0.0930622	0.334073	k__Bacteria	p__Proteobacteria	c__Gammaproteobacteria	o__Orbales	f__Orbaceae	g__Gilliamella	s__Gilliamella apicola
958.687	-0.0132092	0.00788924	-1.67433	0.0940654	0.337131	k__Bacteria	p__Firmicutes	c__Clostridia	o__Clostridiales	f__Clostridiales__na	g__Flavonifractor	s__Flavonifractor plautii
7.37485	-0.0596181	0.0356188	-1.67378	0.0941736	0.337131	k__Bacteria	p__Bacteria__na	c__Bacteria__na	o__Bacteria__na	f__Bacteria__na	g__Bacteria__na	s__uncultured bacterium fosmid pJB69A5
1.85228	-0.0332998	0.0199527	-1.66894	0.0951296	0.339504	k__Bacteria	p__Bacteroidetes	c__Chitinophagia	o__Chitinophagales	f__Chitinophagaceae	g__Arachidicoccus	s__Arachidicoccus rhizosphaerae
13.4944	-0.0282258	0.0169153	-1.66866	0.0951843	0.339504	k__Bacteria	p__Synergistetes	c__Synergistia	o__Synergistales	f__Synergistaceae	g__Pyramidobacter	s__Pyramidobacter piscolens
2763.11	-0.0513437	0.0307774	-1.66823	0.0952704	0.339504	k__Bacteria	p__Bacteroidetes	c__Bacteroidia	o__Bacteroidales	f__Prevotellaceae	g__Prevotella	s__Prevotella sp. CAG:1092
49.8422	0.049472	0.0296822	1.66672	0.0955694	0.339504	k__Bacteria	p__Firmicutes	c__Firmicutes__na	o__Firmicutes__na	f__Firmicutes__na	g__Firmicutes__na	s__Firmicutes bacterium CAG:884
8.80965	-0.0297037	0.0178235	-1.66654	0.095605	0.339504	k__Bacteria	p__Firmicutes	c__Negativicutes	o__Veillonellales	f__Veillonellaceae	g__Veillonellaceae__na	s__Veillonellaceae bacterium DNF00626
25.4103	0.035892	0.0215377	1.66647	0.0956201	0.339504	k__Bacteria	p__Actinobacteria	c__Actinobacteria	o__Bifidobacteriales	f__Bifidobacteriales__na	g__Bifidobacteriales__na	s__Bifidobacteriales bacterium 56_10
72.2772	-0.0260156	0.0156227	-1.66524	0.0958649	0.339908	k__Bacteria	p__Actinobacteria	c__Coriobacteriia	o__Coriobacteriales	f__Coriobacteriaceae	g__Collinsella	s__Collinsella sp. MS5
2.63633	0.0236646	0.0142184	1.66436	0.0960407	0.340005	k__Bacteria	p__Firmicutes	c__Clostridia	o__Clostridiales	f__Peptococcaceae	g__Desulfosporosinus	s__Desulfosporosinus sp. BG
1364.65	-0.0327336	0.0196741	-1.66379	0.0961539	0.340005	k__Bacteria	p__Bacteroidetes	c__Bacteroidia	o__Bacteroidales	f__Bacteroidaceae	g__Bacteroides	s__Bacteroides coprophilus
2.01565	0.028195	0.0169763	1.66084	0.0967456	0.341633	k__Bacteria	p__Firmicutes	c__Clostridia	o__Clostridiales	f__Clostridiales__na	g__Intestinimonas	s__Intestinimonas__uc
22.1157	-0.042256	0.0254967	-1.65731	0.0974565	0.343676	k__Bacteria	p__Bacteroidetes	c__Bacteroidia	o__Bacteroidales	f__Prevotellaceae	g__Prevotella	s__[Hallella] seregens
3.69269	0.0419037	0.0253008	1.65622	0.0976771	0.343988	k__Bacteria	p__Firmicutes	c__Negativicutes	o__Veillonellales	f__Veillonellaceae	g__Veillonella	s__Veillonella sp. ICM51a
46.5556	-0.017361	0.0104946	-1.65428	0.098071	0.344416	k__Bacteria	p__Bacteroidetes	c__Bacteroidia	o__Bacteroidales	f__Porphyromonadaceae	g__Parabacteroides	s__Parabacteroides gordonii
2.60113	-0.0222803	0.0134742	-1.65355	0.0982188	0.344416	k__Bacteria	p__Actinobacteria	c__Coriobacteriia	o__Coriobacteriales	f__Atopobiaceae	g__Atopobium	s__Atopobium rimae
1338.27	-0.0247033	0.0149438	-1.65307	0.0983157	0.344416	k__Bacteria	p__Bacteroidetes	c__Bacteroidia	o__Bacteroidales	f__Odoribacteraceae	g__Butyricimonas	s__Butyricimonas virosa
1.3216	-0.0436644	0.0264151	-1.65301	0.098329	0.344416	k__Bacteria	p__Actinobacteria	c__Coriobacteriia	o__Eggerthellales	f__Eggerthellaceae	g__Slackia	s__Slackia isoflavoniconvertens
1114.45	0.0332737	0.0201508	1.65124	0.0986897	0.344885	k__Bacteria	p__Firmicutes	c__Clostridia	o__Clostridiales	f__Clostridiaceae	g__Clostridium	s__Clostridium sp. CAG:91
9.00306	-0.0465579	0.0281989	-1.65105	0.0987282	0.344885	k__Bacteria	p__Bacteroidetes	c__Bacteroidia	o__Bacteroidales	f__Rikenellaceae	g__Alistipes	s__Alistipes inops
3.20481	0.0187014	0.0113341	1.65002	0.0989387	0.345157	k__Bacteria	p__Firmicutes	c__Clostridia	o__Clostridiales	f__Clostridiaceae	g__Clostridium	s__Clostridium estertheticum
30.8197	-0.0454773	0.0275729	-1.64935	0.0990764	0.345174	k__Bacteria	p__Bacteria__na	c__Bacteria__na	o__Bacteria__na	f__Bacteria__na	g__Bacteria__na	s__uncultured bacterium 3e18
19.0783	-0.0185958	0.0112853	-1.64779	0.0993965	0.345825	k__Bacteria	p__Firmicutes	c__Clostridia	o__Clostridiales	f__Ruminococcaceae	g__Drancourtella	s__Drancourtella massiliensis
46.9261	-0.0191447	0.0116257	-1.64676	0.0996084	0.346099	k__Bacteria	p__Actinobacteria	c__Coriobacteriia	o__Coriobacteriales	f__Coriobacteriaceae	g__Collinsella	s__Collinsella ihuae
38.0935	-0.0240326	0.0146125	-1.64466	0.10004	0.34653	k__Bacteria	p__Bacteroidetes	c__Bacteroidia	o__Bacteroidales	f__Prevotellaceae	g__Prevotella	s__Prevotella sp. oral taxon 317
21.6502	-0.0214436	0.0130403	-1.6444	0.100093	0.34653	k__Bacteria	p__Firmicutes	c__Negativicutes	o__Selenomonadales	f__Selenomonadaceae	g__Anaerovibrio	s__Anaerovibrio lipolyticus
789.538	-0.0253502	0.0154178	-1.64421	0.100132	0.34653	k__Bacteria	p__Actinobacteria	c__Coriobacteriia	o__Eggerthellales	f__Eggerthellaceae	g__Eggerthella	s__Eggerthella__uc
2.50769	-0.0491871	0.0299345	-1.64316	0.100351	0.346823	k__Bacteria	p__Firmicutes	c__Bacilli	o__Lactobacillales	f__Streptococcaceae	g__Streptococcus	s__Streptococcus sp. HMSC076C09
5.90925	-0.0480748	0.0292808	-1.64185	0.10062	0.347293	k__Bacteria	p__Bacteroidetes	c__Bacteroidia	o__Bacteroidales	f__Prevotellaceae	g__Prevotella	s__Prevotella conceptionensis
20.3088	0.0133217	0.00811787	1.64103	0.100791	0.347421	k__Bacteria	p__Firmicutes	c__Clostridia	o__Clostridiales	f__Clostridiaceae	g__Clostridium	s__Clostridium merdae
18.7927	0.0164397	0.0100247	1.63993	0.101021	0.347751	k__Bacteria	p__Firmicutes	c__Erysipelotrichia	o__Erysipelotrichales	f__Erysipelotrichaceae	g__Candidatus Stoquefichus	s__Candidatus Stoquefichus sp. SB1
0.783536	0.0619186	0.0377773	1.63904	0.101205	0.347926	k__Bacteria	p__Bacteroidetes	c__Bacteroidia	o__Bacteroidales	f__Porphyromonadaceae	g__Porphyromonas	s__Porphyromonas sp. COT-108 OH1349
32.1437	-0.0274753	0.0168626	-1.62936	0.103237	0.353669	k__Bacteria	p__Bacteroidetes	c__Bacteroidia	o__Bacteroidales	f__Prevotellaceae	g__Prevotella	s__Prevotella sp. DNF00663
100.644	-0.0288736	0.0177211	-1.62934	0.103242	0.353669	k__Bacteria	p__Proteobacteria	c__Betaproteobacteria	o__Burkholderiales	f__Sutterellaceae	g__Parasutterella	s__Parasutterella excrementihominis
215.537	-0.0357877	0.0219673	-1.62914	0.103284	0.353669	k__Bacteria	p__Firmicutes	c__Firmicutes__na	o__Firmicutes__na	f__Firmicutes__na	g__Firmicutes__na	s__Firmicutes bacterium CAG:194
2.15752	-0.0359322	0.0220753	-1.62771	0.103587	0.35424	k__Bacteria	p__Fusobacteria	c__Fusobacteriia	o__Fusobacteriales	f__Leptotrichiaceae	g__Streptobacillus	s__Streptobacillus moniliformis
20.2293	0.0140496	0.00863497	1.62705	0.103725	0.354248	k__Bacteria	p__Firmicutes	c__Clostridia	o__Clostridiales	f__Clostridiales Family XIII. Incertae Sedis	g__Clostridiales Family XIII. Incertae Sedis__na	s__[Eubacterium] nodatum
296.378	0.0287857	0.0177082	1.62556	0.104043	0.354866	k__Bacteria	p__Actinobacteria	c__Coriobacteriia	o__Eggerthellales	f__Eggerthellaceae	g__Slackia	s__Slackia piriformis
71.0192	0.00882785	0.00543627	1.62388	0.104401	0.355621	k__Bacteria	p__Firmicutes	c__Clostridia	o__Clostridiales	f__Eubacteriaceae	g__Eubacterium	s__Eubacterium sp. 14-2
396.227	-0.0333413	0.0205959	-1.61883	0.105483	0.358059	k__Bacteria	p__Proteobacteria	c__Betaproteobacteria	o__Burkholderiales	f__Burkholderiales__uc	g__Burkholderiales__uc	s__Burkholderiales__uc
1298.3	0.0240028	0.014828	1.61875	0.105501	0.358059	k__Bacteria	p__Firmicutes	c__Firmicutes__na	o__Firmicutes__na	f__Firmicutes__na	g__Firmicutes__na	s__Firmicutes bacterium CAG:170
263.288	0.0164786	0.0101807	1.61861	0.10553	0.358059	k__Bacteria	p__Firmicutes	c__Clostridia	o__Clostridiales	f__Ruminococcaceae	g__Ruminococcus	s__Ruminococcus albus
1.79274	-0.0351887	0.0217511	-1.61779	0.105708	0.358193	k__Bacteria	p__Firmicutes	c__Bacilli	o__Lactobacillales	f__Carnobacteriaceae	g__Granulicatella	s__Granulicatella sp. HMSC31F03
0.848959	0.0559915	0.0347202	1.61265	0.10682	0.360912	k__Bacteria	p__Bacteria__na	c__Bacteria__na	o__Bacteria__na	f__Bacteria__na	g__Bacteria__na	s__uncultured bacterium Contig26
6.71095	0.016956	0.0105185	1.61202	0.106957	0.360912	k__Bacteria	p__Actinobacteria	c__Actinobacteria	o__Actinomycetales	f__Actinomycetaceae	g__Trueperella	s__Trueperella pyogenes
26.2396	0.00624705	0.00387534	1.612	0.106962	0.360912	k__Bacteria	p__Firmicutes	c__Clostridia	o__Clostridiales	f__Lachnospiraceae	g__Herbinix	s__Herbinix hemicellulosilytica
4.14504	0.0172775	0.0107212	1.61152	0.107066	0.360912	k__Bacteria	p__Firmicutes	c__Clostridia	o__Clostridiales	f__Clostridiales__na	g__Clostridiales__na	s__Clostridiales bacterium MCWD3
18.4216	-0.0145429	0.0090285	-1.61078	0.107228	0.360992	k__Bacteria	p__Firmicutes	c__Clostridia	o__Clostridiales	f__Clostridiaceae	g__Clostridium	s__Clostridium beijerinckii
12.1913	0.0319222	0.0198549	1.60778	0.107884	0.36273	k__Bacteria	p__Synergistetes	c__Synergistia	o__Synergistales	f__Synergistaceae	g__Synergistes	s__Synergistes sp. 3_1_syn1
68.379	-0.0217865	0.0135877	-1.6034	0.108846	0.365492	k__Bacteria	p__Firmicutes	c__Erysipelotrichia	o__Erysipelotrichales	f__Erysipelotrichaceae	g__Kandleria	s__Kandleria vitulina
0.803859	-0.0444153	0.0277194	-1.60232	0.109086	0.365529	k__Bacteria	p__Firmicutes	c__Bacilli	o__Bacillales	f__Bacillaceae	g__Bacillus	s__Bacillus flexus
6.16659	0.0374237	0.0233595	1.60208	0.109138	0.365529	k__Bacteria	p__Firmicutes	c__Clostridia	o__Clostridiales	f__Ruminococcaceae	g__Ruminococcus	s__Ruminococcus sp. YE78
50.8791	0.0114459	0.00716131	1.5983	0.109977	0.367864	k__Bacteria	p__Firmicutes	c__Clostridia	o__Clostridiales	f__Ruminococcaceae	g__Hydrogenoanaerobacterium	s__Hydrogenoanaerobacterium saccharovorans
4.1904	-0.0314822	0.0197128	-1.59705	0.110255	0.367948	k__Bacteria	p__Firmicutes	c__Bacilli	o__Lactobacillales	f__Streptococcaceae	g__Streptococcus	s__Streptococcus parauberis
21.2573	-0.020148	0.0126213	-1.59635	0.110411	0.367948	k__Bacteria	p__Firmicutes	c__Clostridia	o__Clostridiales	f__Clostridiales Family XIII. Incertae Sedis	g__Ileibacterium	s__Ileibacterium massiliense
613.928	0.0362178	0.0226889	1.59628	0.110427	0.367948	k__Bacteria	p__Firmicutes	c__Clostridia	o__Clostridiales	f__Eubacteriaceae	g__Eubacterium	s__Eubacterium sp. CAG:192
2.34133	0.0343856	0.0215772	1.5936	0.111025	0.36907	k__Bacteria	p__Firmicutes	c__Negativicutes	o__Veillonellales	f__Veillonellaceae	g__Dialister	s__Dialister pneumosintes
1260.46	0.0267571	0.0167914	1.5935	0.111048	0.36907	k__Bacteria	p__Firmicutes	c__Clostridia	o__Clostridiales	f__Lachnospiraceae	g__Roseburia	s__Roseburia sp. 40_7
2.29294	-0.0337264	0.021193	-1.59139	0.111521	0.369868	k__Bacteria	p__Bacteroidetes	c__Bacteroidia	o__Bacteroidales	f__Porphyromonadaceae	g__Porphyromonas	s__Porphyromonas bennonis
1.66769	0.026587	0.0167092	1.59117	0.111572	0.369868	k__Bacteria	p__Firmicutes	c__Clostridia	o__Clostridiales	f__Peptococcaceae	g__Thermincola	s__Thermincola__uc
4.55685	0.0353144	0.0222056	1.59034	0.111758	0.370013	k__Bacteria	p__Proteobacteria	c__Deltaproteobacteria	o__Desulfovibrionales	f__Desulfovibrionaceae	g__Desulfovibrio	s__Candidatus Desulfovibrio trichonymphae
3.553	-0.0326994	0.0205894	-1.58817	0.112249	0.371164	k__Bacteria	p__Fibrobacteres	c__Fibrobacteria	o__Fibrobacterales	f__Fibrobacteraceae	g__Fibrobacter	s__Fibrobacter sp. UWB13
1.09329	0.0467635	0.0294835	1.58609	0.112719	0.372246	k__Bacteria	p__Firmicutes	c__Bacilli	o__Lactobacillales	f__Lactobacillaceae	g__Lactobacillus	s__Lactobacillus ingluviei
2.25279	-0.0308934	0.0194859	-1.58542	0.112871	0.372273	k__Bacteria	p__Firmicutes	c__Bacilli	o__Lactobacillales	f__Streptococcaceae	g__Streptococcus	s__Streptococcus henryi
271.81	0.0254181	0.0160491	1.58377	0.113247	0.37304	k__Bacteria	p__Firmicutes	c__Firmicutes__na	o__Firmicutes__na	f__Firmicutes__na	g__Firmicutes__na	s__Firmicutes bacterium CAG:110_56_8
4.70994	-0.0250254	0.0158162	-1.58227	0.113589	0.373356	k__Bacteria	p__Firmicutes	c__Clostridia	o__Clostridiales	f__Lachnospiraceae	g__Butyrivibrio	s__Butyrivibrio sp. MB2005
140.893	-0.0190669	0.0120517	-1.58209	0.11363	0.373356	k__Bacteria	p__Bacteroidetes	c__Bacteroidia	o__Bacteroidales	f__Bacteroidaceae	g__Bacteroides	s__Bacteroides sp. 1_1_6
15.2462	0.0213406	0.0135179	1.57868	0.114409	0.374649	k__Bacteria	p__Firmicutes	c__Clostridia	o__Clostridiales	f__Lachnospiraceae	g__Lachnospiraceae__na	s__Lachnospiraceae bacterium KHCPX20
11.7835	-0.0195025	0.0123573	-1.57822	0.114516	0.374649	k__Bacteria	p__Bacteroidetes	c__Bacteroidia	o__Bacteroidales	f__Porphyromonadaceae	g__Dysgonomonas	s__Dysgonomonas sp. 37-18
109.099	-0.0408455	0.0258815	-1.57817	0.114527	0.374649	k__Bacteria	p__Bacteroidetes	c__Bacteroidia	o__Bacteroidales	f__Prevotellaceae	g__Prevotella	s__Prevotella sp. P4-76
95.1351	0.0255995	0.0162243	1.57785	0.1146	0.374649	k__Bacteria	p__Firmicutes	c__Clostridia	o__Clostridiales	f__Lachnospiraceae	g__Lachnospiraceae__na	s__Lachnospiraceae bacterium CAG:25
5.21506	0.0163626	0.0103781	1.57665	0.114876	0.374947	k__Bacteria	p__Firmicutes	c__Tissierellia	o__Tissierellales	f__Tissierellales__na	g__Sporanaerobacter	s__Sporanaerobacter sp. PP17-6a
60.6604	-0.0248206	0.0157471	-1.5762	0.11498	0.374947	k__Bacteria	p__Firmicutes	c__Clostridia	o__Clostridiales	f__Lachnospiraceae	g__Lachnospiraceae__na	s__Lachnospiraceae bacterium 6_1_63FAA
5.10521	-0.0195401	0.0124305	-1.57195	0.115962	0.377286	k__Bacteria	p__Firmicutes	c__Clostridia	o__Clostridiales	f__Clostridiales Family XIII. Incertae Sedis	g__Mogibacterium	s__Mogibacterium timidum
1.84944	0.0694687	0.0441958	1.57184	0.115988	0.377286	k__Bacteria	p__Proteobacteria	c__Gammaproteobacteria	o__Enterobacterales	f__Enterobacteriaceae	g__Enterobacter	s__Enterobacter kobei
12.9476	-0.0288632	0.0183791	-1.57044	0.116314	0.377874	k__Bacteria	p__Firmicutes	c__Bacilli	o__Lactobacillales	f__Carnobacteriaceae	g__Granulicatella	s__Granulicatella__uc
115.818	0.0126001	0.00803393	1.56837	0.116796	0.378967	k__Bacteria	p__Firmicutes	c__Clostridia	o__Clostridiales	f__Oscillospiraceae	g__Oscillibacter	s__Oscillibacter ruminantium
25.5441	-0.0175477	0.0112039	-1.56621	0.117299	0.379893	k__Bacteria	p__Actinobacteria	c__Coriobacteriia	o__Coriobacteriales	f__Coriobacteriaceae	g__Collinsella	s__Collinsella phocaeensis
5.84967	0.016991	0.0108507	1.56589	0.117374	0.379893	k__Bacteria	p__Firmicutes	c__Negativicutes	o__Selenomonadales	f__Sporomusaceae	g__Sporomusaceae__uc	s__Sporomusaceae__uc
5.96415	0.0143969	0.00920646	1.56378	0.117869	0.381021	k__Bacteria	p__Firmicutes	c__Clostridia	o__Clostridiales	f__Clostridiaceae	g__Clostridiaceae__na	s__Clostridiaceae bacterium mt12
157.72	-0.0254106	0.016274	-1.56143	0.118423	0.382338	k__Bacteria	p__Bacteroidetes	c__Bacteroidia	o__Bacteroidales	f__Prevotellaceae	g__Prevotella	s__Prevotella disiens
24.9169	-0.0309615	0.019846	-1.56008	0.11874	0.382886	k__Bacteria	p__Firmicutes	c__Erysipelotrichia	o__Erysipelotrichales	f__Erysipelotrichaceae	g__Erysipelotrichaceae__na	s__Erysipelotrichaceae bacterium I46
5.80141	0.0153712	0.00985696	1.55943	0.118895	0.382908	k__Bacteria	p__Spirochaetes	c__Spirochaetia	o__Spirochaetales	f__Spirochaetaceae	g__Treponema	s__Treponema saccharophilum
4.29514	-0.0621809	0.0399646	-1.5559	0.119732	0.384657	k__Bacteria	p__Proteobacteria	c__Gammaproteobacteria	o__Enterobacterales	f__Enterobacteriaceae	g__Citrobacter	s__Citrobacter koseri
1325.8	-0.0316705	0.0203552	-1.55589	0.119734	0.384657	k__Bacteria	p__Firmicutes	c__Clostridia	o__Clostridiales	f__Clostridiaceae	g__Clostridium	s__Clostridium sp. CAG:169
1.58132	-0.0399115	0.0256975	-1.55313	0.120393	0.386131	k__Bacteria	p__Bacteroidetes	c__Flavobacteriia	o__Flavobacteriales	f__Flavobacteriaceae	g__Capnocytophaga	s__Capnocytophaga cynodegmi
22.0928	-0.0363618	0.0234181	-1.55272	0.120489	0.386131	k__Bacteria	p__Bacteroidetes	c__Bacteroidia	o__Bacteroidales	f__Bacteroidaceae	g__Bacteroides	s__Bacteroides faecis CAG:32
1814.07	0.0258766	0.0166917	1.55026	0.121079	0.387171	k__Bacteria	p__Firmicutes	c__Firmicutes__na	o__Firmicutes__na	f__Firmicutes__na	g__Firmicutes__na	s__Firmicutes bacterium CAG:110
2.65931	0.0206033	0.0132914	1.55012	0.121112	0.387171	k__Bacteria	p__Firmicutes	c__Clostridia	o__Clostridiales	f__Clostridiaceae	g__Clostridium	s__Clostridium tunisiense
4.59457	0.0339019	0.0218815	1.54934	0.121299	0.387293	k__Bacteria	p__Bacteria__na	c__Bacteria__na	o__Bacteria__na	f__Bacteria__na	g__Bacteria__na	s__uncultured bacterium scaffold00056
40.2471	-0.0369463	0.0238599	-1.54847	0.121509	0.387486	k__Bacteria	p__Bacteroidetes	c__Bacteroidia	o__Bacteroidales	f__Prevotellaceae	g__Prevotella	s__Prevotella enoeca
1.46289	-0.0361494	0.0233692	-1.54688	0.121891	0.388229	k__Bacteria	p__Actinobacteria	c__Actinobacteria	o__Corynebacteriales	f__Nocardiaceae	g__Rhodococcus	s__Rhodococcus__uc
3.80038	-0.0234278	0.0151583	-1.54554	0.122215	0.388783	k__Bacteria	p__Proteobacteria	c__Betaproteobacteria	o__Burkholderiales	f__Burkholderiaceae	g__Burkholderia	s__Burkholderia mallei
218.198	0.0225491	0.0146059	1.54383	0.122629	0.389407	k__Bacteria	p__Bacteroidetes	c__Bacteroidia	o__Bacteroidales	f__Rikenellaceae	g__Alistipes	s__Alistipes sp. Marseille-P2431
9.88238	0.0312048	0.0202305	1.54247	0.12296	0.389407	k__Bacteria	p__Firmicutes	c__Negativicutes	o__Veillonellales	f__Veillonellaceae	g__Veillonella	s__Veillonella tobetsuensis
0.980769	0.0387153	0.0251048	1.54215	0.123038	0.389407	k__Bacteria	p__Bacteroidetes	c__Chitinophagia	o__Chitinophagales	f__Chitinophagaceae	g__Niabella	s__Niabella soli
12.986	-0.00980511	0.00635905	-1.54191	0.123095	0.389407	k__Bacteria	p__Firmicutes	c__Clostridia	o__Clostridiales	f__Lachnospiraceae	g__Pseudobutyrivibrio	s__Pseudobutyrivibrio sp. ACV-2
1.3579	-0.0540949	0.0350891	-1.54164	0.12316	0.389407	k__Bacteria	p__Proteobacteria	c__Gammaproteobacteria	o__Enterobacterales	f__Enterobacteriaceae	g__Yokenella	s__Yokenella regensburgei
3.48779	0.0528176	0.0342803	1.54076	0.123376	0.389615	k__Bacteria	p__Firmicutes	c__Negativicutes	o__Veillonellales	f__Veillonellaceae	g__Veillonella	s__Veillonella sp. HPA0037
9.20381	-0.0209405	0.013604	-1.53929	0.123733	0.39027	k__Bacteria	p__Candidatus Saccharibacteria	c__Candidatus Saccharibacteria__na	o__Candidatus Saccharibacteria__na	f__Candidatus Saccharibacteria__na	g__Candidatus Saccharibacteria__na	s__Candidatus Saccharibacteria oral taxon TM7x
3.10981	-0.0427827	0.0278299	-1.5373	0.124221	0.391317	k__Bacteria	p__Actinobacteria	c__Coriobacteriia	o__Coriobacteriales	f__Atopobiaceae	g__Atopobium	s__Atopobium minutum
219.632	0.023951	0.015586	1.5367	0.124366	0.391317	k__Bacteria	p__Firmicutes	c__Clostridia	o__Clostridiales	f__Ruminococcaceae	g__Ruminococcus	s__Ruminococcus sp. CAG:579
37201	-0.0216012	0.0140805	-1.53412	0.125001	0.392333	k__Bacteria	p__Bacteroidetes	c__Bacteroidia	o__Bacteroidales	f__Rikenellaceae	g__Alistipes	s__Alistipes__uc
15.671	0.012261	0.00799438	1.5337	0.125103	0.392333	k__Bacteria	p__Firmicutes	c__Clostridia	o__Clostridiales	f__Lachnospiraceae	g__Lachnospiraceae__na	s__Lachnospiraceae bacterium NE2001
33.5348	-0.0172729	0.0112634	-1.53354	0.125142	0.392333	k__Bacteria	p__Bacteroidetes	c__Bacteroidia	o__Bacteroidales	f__Bacteroidaceae	g__Bacteroides	s__Bacteroides luti
759.748	0.0264609	0.017263	1.53281	0.125322	0.392424	k__Bacteria	p__Bacteroidetes	c__Bacteroidia	o__Bacteroidales	f__Rikenellaceae	g__Alistipes	s__Alistipes putredinis CAG:67
1.38816	-0.0468122	0.0305823	-1.5307	0.125844	0.393584	k__Bacteria	p__Firmicutes	c__Bacilli	o__Lactobacillales	f__Aerococcaceae	g__Abiotrophia	s__Abiotrophia defectiva
17.5348	-0.0253636	0.0165964	-1.52826	0.126448	0.393742	k__Bacteria	p__Firmicutes	c__Bacilli	o__Lactobacillales	f__Streptococcaceae	g__Streptococcus	s__Streptococcus gallolyticus
3.072	0.0168198	0.0110102	1.52766	0.126598	0.393742	k__Bacteria	p__Firmicutes	c__Clostridia	o__Clostridiales	f__Eubacteriaceae	g__Acetobacterium	s__Acetobacterium dehalogenans
1374.1	-0.0124081	0.00812297	-1.52753	0.12663	0.393742	k__Bacteria	p__Firmicutes	c__Clostridia	o__Clostridiales	f__Lachnospiraceae	g__Dorea	s__Dorea formicigenerans
2.92829	0.0195487	0.0128002	1.52722	0.126706	0.393742	k__Bacteria	p__Firmicutes	c__Clostridia	o__Clostridiales	f__Clostridiales__na	g__Gottschalkia	s__[Clostridium] purinilyticum
35.0721	0.01426	0.00934009	1.52675	0.126823	0.393742	k__Bacteria	p__Firmicutes	c__Clostridia	o__Clostridiales	f__Clostridiaceae	g__Clostridium	s__Clostridium sp. ATCC 29733
1.88489	0.0236789	0.015517	1.526	0.127011	0.393742	k__Bacteria	p__Bacteria__na	c__Bacteria__na	o__Bacteria__na	f__Bacteria__na	g__Bacteria__na	s__uncultured bacterium Contig1604
8.58429	-0.0181024	0.0118647	-1.52574	0.127074	0.393742	k__Bacteria	p__Firmicutes	c__Clostridia	o__Clostridiales	f__Clostridiaceae	g__Clostridium	s__Clostridium saccharobutylicum
11.0995	0.012097	0.00792925	1.52561	0.127106	0.393742	k__Bacteria	p__Firmicutes	c__Clostridia	o__Clostridiales	f__Clostridiaceae	g__Oxobacter	s__Oxobacter pfennigii
12.088	-0.0189115	0.0124062	-1.52435	0.127421	0.394247	k__Bacteria	p__Bacteroidetes	c__Bacteroidia	o__Bacteroidales	f__Porphyromonadaceae	g__Dysgonomonas	s__Dysgonomonas gadei
10.9941	-0.0400569	0.0263072	-1.52266	0.127845	0.394945	k__Bacteria	p__Firmicutes	c__Clostridia	o__Clostridiales	f__Ruminococcaceae	g__Ruminococcus	s__Ruminococcus torques CAG:61
31.249	0.00750976	0.00493426	1.52196	0.128018	0.394945	k__Bacteria	p__Firmicutes	c__Clostridia	o__Clostridiales	f__Lachnospiraceae	g__Lachnospiraceae__na	s__Lachnospiraceae bacterium YSD2013
336.414	-0.0287987	0.0189308	-1.52126	0.128194	0.394945	k__Bacteria	p__Firmicutes	c__Clostridia	o__Clostridiales	f__Peptostreptococcaceae	g__Intestinibacter	s__Intestinibacter bartlettii
1820.05	0.0317544	0.020877	1.52102	0.128254	0.394945	k__Bacteria	p__Bacteroidetes	c__Bacteroidia	o__Bacteroidales	f__Bacteroidaceae	g__Bacteroides	s__Bacteroides eggerthii
4.32967	0.0205545	0.01354	1.51805	0.129001	0.396773	k__Bacteria	p__Firmicutes	c__Bacilli	o__Bacillales	f__Paenibacillaceae	g__Paenibacillus	s__Paenibacillus odorifer
2.66317	0.0221826	0.0146351	1.51572	0.129591	0.398116	k__Bacteria	p__Firmicutes	c__Clostridia	o__Clostridiales	f__Clostridiaceae	g__Candidatus Arthromitus	s__Candidatus Arthromitus__uc
114.052	0.0398192	0.0262879	1.51474	0.129839	0.398408	k__Bacteria	p__Firmicutes	c__Clostridia	o__Clostridiales	f__Clostridiaceae	g__Clostridium	s__Clostridium sp. CAG:492
18.1154	0.0203049	0.0134151	1.51358	0.130131	0.398834	k__Bacteria	p__Firmicutes	c__Clostridia	o__Clostridiales	f__Peptostreptococcaceae	g__Asaccharospora	s__Asaccharospora irregularis
313.641	0.0221273	0.0146303	1.51243	0.130424	0.399259	k__Bacteria	p__Firmicutes	c__Clostridia	o__Clostridiales	f__Ruminococcaceae	g__Neglecta	s__Neglecta timonensis
1.91501	0.023698	0.0156889	1.5105	0.130916	0.400294	k__Bacteria	p__Firmicutes	c__Clostridia	o__Clostridiales	f__Clostridiaceae	g__Clostridium	s__Clostridium sp. mt5
0.976551	0.0501481	0.0332685	1.50737	0.131715	0.402177	k__Bacteria	p__Firmicutes	c__Bacilli	o__Lactobacillales	f__Leuconostocaceae	g__Leuconostoc	s__Leuconostoc pseudomesenteroides
14.6427	0.0171751	0.0114024	1.50627	0.131998	0.402177	k__Bacteria	p__Firmicutes	c__Tissierellia	o__Tissierellales	f__Peptoniphilaceae	g__Anaerococcus	s__Anaerococcus__uc
151.32	0.0335752	0.0222945	1.50598	0.132071	0.402177	k__Bacteria	p__Firmicutes	c__Erysipelotrichia	o__Erysipelotrichales	f__Erysipelotrichaceae	g__Turicibacter	s__Turicibacter sanguinis
20.5091	0.0401419	0.0266604	1.50567	0.132151	0.402177	k__Bacteria	p__Firmicutes	c__Negativicutes	o__Veillonellales	f__Veillonellaceae	g__Veillonella	s__Veillonella atypica
134.639	-0.0365832	0.0243235	-1.50403	0.132574	0.402446	k__Bacteria	p__Bacteroidetes	c__Bacteroidia	o__Bacteroidales	f__Prevotellaceae	g__Prevotella	s__Prevotella sp. P4-65
7.62322	-0.0152413	0.0101339	-1.50399	0.132584	0.402446	k__Bacteria	p__Firmicutes	c__Clostridia	o__Clostridiales	f__Lachnospiraceae	g__Lachnospiraceae__na	s__Lachnospiraceae bacterium NLAE-zl-G231
45.8557	-0.0120407	0.00800834	-1.50353	0.132704	0.402446	k__Bacteria	p__Firmicutes	c__Clostridia	o__Clostridia__na	f__Clostridia__na	g__Clostridia__na	s__Clostridia bacterium UC5.1-2H11
1494.18	-0.0120702	0.00804468	-1.50039	0.133513	0.404431	k__Bacteria	p__Firmicutes	c__Clostridia	o__Clostridia__uc	f__Clostridia__uc	g__Clostridia__uc	s__Clostridia__uc
2.2597	0.0202473	0.0135146	1.49818	0.134087	0.405694	k__Bacteria	p__Firmicutes	c__Clostridia	o__Clostridiales	f__Lachnospiraceae	g__Butyrivibrio	s__Butyrivibrio sp. AD3002
114.031	-0.0138639	0.00925825	-1.49746	0.134273	0.405785	k__Bacteria	p__Firmicutes	c__Clostridia	o__Clostridiales	f__Clostridiaceae	g__Butyricicoccus	s__Butyricicoccus__uc
141.537	-0.0185422	0.012388	-1.49679	0.134448	0.405844	k__Bacteria	p__Actinobacteria	c__Coriobacteriia	o__Eggerthellales	f__Eggerthellaceae	g__Gordonibacter	s__Gordonibacter sp. Marseille-P2775
1.16995	0.0590581	0.0394773	1.496	0.134653	0.40599	k__Bacteria	p__Firmicutes	c__Bacilli	o__Lactobacillales	f__Streptococcaceae	g__Streptococcus	s__Streptococcus sp. HMSC057E02
2.69365	-0.0210105	0.0140635	-1.49397	0.135183	0.407116	k__Bacteria	p__Firmicutes	c__Tissierellia	o__Tissierellales	f__Peptoniphilaceae	g__Anaerococcus	s__Anaerococcus tetradius
130.418	0.0116144	0.00777803	1.49324	0.135376	0.407224	k__Bacteria	p__Firmicutes	c__Clostridia	o__Clostridiales	f__Clostridiales__na	g__Clostridiales__na	s__Clostridiales bacterium NK3B98
89.4797	-0.0250053	0.0167712	-1.49097	0.135969	0.408536	k__Bacteria	p__Actinobacteria	c__Coriobacteriia	o__Coriobacteriales	f__Coriobacteriaceae	g__Collinsella	s__Collinsella sp. CAG:289
37.8496	0.00732388	0.00491744	1.48937	0.13639	0.408844	k__Bacteria	p__Firmicutes	c__Clostridia	o__Clostridiales	f__Clostridiaceae	g__Clostridium	s__Clostridium sp. Marseille-P299
6.6408	0.0328706	0.0220845	1.4884	0.136646	0.408844	k__Bacteria	p__Lentisphaerae	c__Lentisphaerae__uc	o__Lentisphaerae__uc	f__Lentisphaerae__uc	g__Lentisphaerae__uc	s__Lentisphaerae__uc
25.1755	0.00905037	0.00608306	1.4878	0.136804	0.408844	k__Bacteria	p__Firmicutes	c__Clostridia	o__Clostridiales	f__Lachnospiraceae	g__Lachnospiraceae__na	s__Lachnospiraceae bacterium AC2029
2126.12	0.0241374	0.0162242	1.48775	0.136818	0.408844	k__Bacteria	p__Firmicutes	c__Clostridia	o__Clostridiales	f__Ruminococcaceae	g__Ruminococcus	s__Ruminococcus bromii
160.131	-0.0323308	0.0217337	-1.48759	0.136858	0.408844	k__Bacteria	p__Bacteroidetes	c__Bacteroidia	o__Bacteroidales	f__Prevotellaceae	g__Prevotella	s__Prevotella paludivivens
49.9715	-0.0305051	0.0205496	-1.48446	0.137686	0.410845	k__Bacteria	p__Bacteroidetes	c__Bacteroidia	o__Bacteroidales	f__Prevotellaceae	g__Prevotella	s__Prevotella marshii
71.6774	0.0129158	0.00875183	1.47578	0.140003	0.416587	k__Bacteria	p__Firmicutes	c__Clostridia	o__Clostridiales	f__Clostridiales__na	g__Clostridiales__na	s__Clostridiales bacterium CHKCI006
239.706	-0.0360956	0.0244613	-1.47562	0.140045	0.416587	k__Bacteria	p__Firmicutes	c__Clostridia	o__Clostridiales	f__Clostridiaceae	g__Clostridium	s__Clostridium sp. CAG:217_53_7
2.24586	-0.0338437	0.0229379	-1.47545	0.140091	0.416587	k__Bacteria	p__Tenericutes	c__Mollicutes	o__Entomoplasmatales	f__Spiroplasmataceae	g__Spiroplasma	s__Spiroplasma kunkelii
123.677	-0.0411385	0.027927	-1.47307	0.140731	0.418012	k__Bacteria	p__Bacteroidetes	c__Bacteroidia	o__Bacteroidales	f__Prevotellaceae	g__Prevotella	s__Prevotella sp. P5-119
38.7804	-0.0284106	0.0193228	-1.47032	0.141475	0.419743	k__Bacteria	p__Proteobacteria	c__Deltaproteobacteria	o__Desulfovibrionales	f__Desulfovibrionaceae	g__Desulfovibrio	s__Desulfovibrio desulfuricans
3.90919	0.0341944	0.0232879	1.46833	0.142014	0.420392	k__Bacteria	p__Firmicutes	c__Clostridia	o__Clostridiales	f__Clostridiaceae	g__Clostridium	s__Clostridium sp. CAG:505
3.27054	-0.0383623	0.0261267	-1.46832	0.142018	0.420392	k__Bacteria	p__Bacteroidetes	c__Bacteroidia	o__Bacteroidales	f__Prevotellaceae	g__Prevotella	s__Prevotella sp. FD3004
946.002	0.0243723	0.0166063	1.46765	0.142199	0.420449	k__Bacteria	p__Bacteroidetes	c__Bacteroidia	o__Bacteroidales	f__Bacteroidaceae	g__Bacteroides	s__Bacteroides sp. CAG:20
238.06	-0.0174382	0.0118887	-1.46678	0.142435	0.420668	k__Bacteria	p__Bacteroidetes	c__Bacteroidia	o__Bacteroidales	f__Bacteroidaceae	g__Bacteroides	s__Bacteroides oleiciplenus
40.0026	0.0136992	0.00934925	1.46527	0.142847	0.421406	k__Bacteria	p__Firmicutes	c__Clostridia	o__Clostridiales	f__Lachnospiraceae	g__Acetitomaculum	s__Acetitomaculum ruminis
138.31	-0.0191686	0.0131252	-1.46044	0.144169	0.423749	k__Bacteria	p__Firmicutes	c__Bacilli	o__Lactobacillales	f__Lactobacillaceae	g__Sharpea	s__Sharpea azabuensis
45.5485	0.0126728	0.00867791	1.46035	0.144193	0.423749	k__Bacteria	p__Firmicutes	c__Clostridia	o__Clostridiales	f__Clostridiales Family XIII. Incertae Sedis	g__Anaerovorax	s__Anaerovorax odorimutans
1.97359	-0.0296145	0.0202856	-1.45988	0.144323	0.423749	k__Bacteria	p__Firmicutes	c__Bacilli	o__Lactobacillales	f__Streptococcaceae	g__Streptococcus	s__Streptococcus uberis
6.38862	0.0203619	0.0139492	1.45971	0.144369	0.423749	k__Bacteria	p__Actinobacteria	c__Coriobacteriia	o__Coriobacteriales	f__Atopobiaceae	g__Atopobium	s__Atopobium fossor
2020.58	0.0191739	0.0131383	1.45939	0.144458	0.423749	k__Bacteria	p__Firmicutes	c__Clostridia	o__Clostridiales	f__Ruminococcaceae	g__Subdoligranulum	s__Subdoligranulum sp. 60_17
9.14226	0.0259535	0.0177909	1.4588	0.144619	0.423749	k__Bacteria	p__Bacteroidetes	c__Bacteroidia	o__Bacteroidales	f__Porphyromonadaceae	g__Macellibacteroides	s__Macellibacteroides sp. HH-ZS
19.7729	-0.0163678	0.0112374	-1.45654	0.145243	0.424929	k__Bacteria	p__Bacteroidetes	c__Bacteroidia	o__Bacteroidales	f__Porphyromonadaceae	g__Parabacteroides	s__Parabacteroides sp. Marseille-P3160
240.764	-0.0278449	0.0191221	-1.45616	0.145349	0.424929	k__Bacteria	p__Bacteroidetes	c__Bacteroidia	o__Bacteroidales	f__Prevotellaceae	g__Prevotella	s__Prevotella sp. CAG:924
8.70899	0.0123575	0.00849367	1.45491	0.145693	0.425457	k__Bacteria	p__Firmicutes	c__Clostridia	o__Clostridiales	f__Peptostreptococcaceae	g__Peptoclostridium	s__Peptoclostridium acidaminophilum
2.48746	0.0197279	0.0135756	1.45319	0.146171	0.425683	k__Bacteria	p__Firmicutes	c__Bacilli	o__Lactobacillales	f__Lactobacillaceae	g__Lactobacillus	s__Lactobacillus amylophilus
51.2061	0.0109115	0.00750978	1.45297	0.146231	0.425683	k__Bacteria	p__Firmicutes	c__Clostridia	o__Clostridiales	f__Ruminococcaceae	g__Ruminococcaceae__na	s__Ruminococcaceae bacterium Marseille-P2935
150.806	0.0106737	0.00734669	1.45286	0.146262	0.425683	k__Bacteria	p__Firmicutes	c__Firmicutes__na	o__Firmicutes__na	f__Firmicutes__na	g__Firmicutes__na	s__Firmicutes bacterium ASF500
8.55531	-0.0186988	0.0128882	-1.45085	0.14682	0.42683	k__Bacteria	p__Fusobacteria	c__Fusobacteriia	o__Fusobacteriales	f__Fusobacteriaceae	g__Fusobacterium	s__Fusobacterium nucleatum
14.7923	0.0244266	0.0168429	1.45027	0.146985	0.42683	k__Bacteria	p__Firmicutes	c__Clostridia	o__Clostridiales	f__Peptostreptococcaceae	g__Peptostreptococcaceae__na	s__Peptostreptococcaceae bacterium VA2
2375.37	0.0136995	0.009452	1.44938	0.147232	0.427071	k__Bacteria	p__Firmicutes	c__Clostridia	o__Clostridiales	f__Clostridiales__na	g__Clostridiales__na	s__Clostridiales bacterium 41_12_two_minus
0.908837	-0.0695147	0.0480047	-1.44808	0.147594	0.427645	k__Bacteria	p__Proteobacteria	c__Gammaproteobacteria	o__Enterobacterales	f__Enterobacteriaceae	g__Cedecea	s__Cedecea davisae
69.5505	-0.0242116	0.0167463	-1.44578	0.148238	0.428988	k__Bacteria	p__Bacteroidetes	c__Bacteroidia	o__Bacteroidales	f__Bacteroidales__na	g__Bacteroidales__na	s__Bacteroidales bacterium 52_46
2.42624	0.0231634	0.0160272	1.44525	0.148388	0.428988	k__Bacteria	p__Firmicutes	c__Bacilli	o__Bacillales	f__Bacillaceae	g__Bacillus	s__Bacillus azotoformans
7.29185	0.0194794	0.013484	1.44463	0.148563	0.429016	k__Bacteria	p__Firmicutes	c__Tissierellia	o__Tissierellia__na	f__Tissierellia__na	g__Kallipyga	s__Kallipyga massiliensis
3.10702	-0.0375395	0.0259964	-1.44403	0.148731	0.429026	k__Bacteria	p__Proteobacteria	c__Betaproteobacteria	o__Burkholderiales	f__Burkholderiaceae	g__Lautropia	s__Lautropia mirabilis
1.12488	-0.034855	0.0241607	-1.44263	0.149124	0.429267	k__Bacteria	p__Firmicutes	c__Bacilli	o__Bacillales	f__Paenibacillaceae	g__Paenibacillus	s__Paenibacillus curdlanolyticus
4.5353	0.0164992	0.0114383	1.44245	0.149175	0.429267	k__Bacteria	p__Firmicutes	c__Clostridia	o__Clostridiales	f__Peptococcaceae	g__Peptococcaceae__na	s__Peptococcaceae bacterium 1109
89.555	-0.031106	0.0215806	-1.44139	0.149475	0.429267	k__Bacteria	p__Bacteroidetes	c__Bacteroidia	o__Bacteroidales	f__Prevotellaceae	g__Prevotella	s__Prevotella buccae
8.51541	0.0110955	0.00769781	1.44139	0.149475	0.429267	k__Bacteria	p__Firmicutes	c__Clostridia	o__Clostridiales	f__Lachnospiraceae	g__Butyrivibrio	s__Butyrivibrio sp. AE3009
10.7956	0.0151933	0.0105465	1.4406	0.149697	0.429429	k__Bacteria	p__Firmicutes	c__Clostridia	o__Clostridiales	f__Christensenellaceae	g__Christensenella	s__Christensenella sp. AF73-05CM02
3.69495	-0.0321146	0.0223177	-1.43897	0.150158	0.430278	k__Bacteria	p__Proteobacteria	c__Epsilonproteobacteria	o__Campylobacterales	f__Campylobacteraceae	g__Campylobacter	s__Campylobacter concisus
688.951	-0.0282853	0.0196713	-1.4379	0.150462	0.430673	k__Bacteria	p__Bacteroidetes	c__Bacteroidia	o__Bacteroidales	f__Bacteroidaceae	g__Bacteroides	s__Bacteroides salyersiae
22.7003	-0.0121671	0.00847634	-1.43541	0.151169	0.43222	k__Bacteria	p__Firmicutes	c__Bacilli	o__Lactobacillales	f__Enterococcaceae	g__Enterococcus	s__Enterococcus cecorum
3.93869	0.0197583	0.0138282	1.42885	0.153049	0.437114	k__Bacteria	p__Firmicutes	c__Clostridia	o__Clostridiales	f__Lachnospiraceae	g__Pseudobutyrivibrio	s__Pseudobutyrivibrio sp. UC1225
2.45815	-0.0251466	0.0176606	-1.42388	0.154482	0.440347	k__Bacteria	p__Firmicutes	c__Clostridia	o__Clostridiales	f__Peptostreptococcaceae	g__Peptostreptococcaceae__na	s__Peptostreptococcaceae bacterium AS15
1.85051	-0.0270952	0.0190309	-1.42375	0.15452	0.440347	k__Bacteria	p__Firmicutes	c__Negativicutes	o__Veillonellales	f__Veillonellaceae	g__Megasphaera	s__Megasphaera sp. UPII 135-E
249.743	-0.028721	0.0201927	-1.42234	0.154926	0.441022	k__Bacteria	p__Actinobacteria	c__Coriobacteriia	o__Eggerthellales	f__Eggerthellaceae	g__Eggerthella	s__Eggerthella sp. 51_9
44.7044	-0.0152968	0.0107747	-1.4197	0.155696	0.442728	k__Bacteria	p__Firmicutes	c__Clostridia	o__Clostridia__na	f__Clostridia__na	g__Clostridia__na	s__Clostridia bacterium UC5.1-1D1
119.317	0.0109062	0.00768941	1.41835	0.15609	0.443363	k__Bacteria	p__Firmicutes	c__Clostridia	o__Clostridiales	f__Oscillospiraceae	g__Oscillibacter	s__Oscillibacter valericigenes
1.96521	-0.0245367	0.0173263	-1.41615	0.156731	0.444697	k__Bacteria	p__Firmicutes	c__Negativicutes	o__Selenomonadales	f__Selenomonadaceae	g__Selenomonas	s__Selenomonas noxia
1371.48	0.0153904	0.0108837	1.41408	0.157338	0.445934	k__Bacteria	p__Firmicutes	c__Clostridia	o__Clostridiales	f__Clostridiales__na	g__Clostridiales__na	s__Clostridiales bacterium KLE1615
4.48899	-0.0218532	0.0154949	-1.41035	0.158437	0.44856	k__Bacteria	p__Firmicutes	c__Clostridia	o__Clostridiales	f__Clostridiaceae	g__Clostridium	s__Clostridium uliginosum
7.83709	0.0114903	0.00815148	1.4096	0.158658	0.448608	k__Bacteria	p__Spirochaetes	c__Spirochaetia	o__Spirochaetales	f__Spirochaetaceae	g__Treponema	s__Treponema primitia
35.6105	0.00600702	0.00426296	1.40912	0.158799	0.448608	k__Bacteria	p__Firmicutes	c__Clostridia	o__Clostridiales	f__Lachnospiraceae	g__Butyrivibrio	s__Butyrivibrio proteoclasticus
120.404	-0.0221703	0.0157491	-1.40772	0.159214	0.449292	k__Bacteria	p__Bacteroidetes	c__Bacteroidia	o__Bacteroidales	f__Bacteroidaceae	g__Bacteroides	s__Bacteroides barnesiae
2.73453	0.0185029	0.0131509	1.40696	0.159439	0.449437	k__Bacteria	p__Firmicutes	c__Bacilli	o__Bacillales	f__Paenibacillaceae	g__Paenibacillus	s__Paenibacillus macerans
1.54599	0.0297622	0.0212448	1.40092	0.161239	0.453966	k__Bacteria	p__Proteobacteria	c__Deltaproteobacteria	o__Desulfovibrionales	f__Desulfovibrionaceae	g__Desulfovibrio	s__Desulfovibrio bizertensis
21.0296	0.00824833	0.00589	1.4004	0.161395	0.453966	k__Bacteria	p__Firmicutes	c__Clostridia	o__Clostridiales	f__Lachnospiraceae	g__Lachnospiraceae__na	s__Lachnospiraceae bacterium G41
8.47387	-0.0245359	0.017548	-1.39822	0.162047	0.455309	k__Bacteria	p__Firmicutes	c__Clostridia	o__Clostridiales	f__Lachnospiraceae	g__Butyrivibrio	s__Butyrivibrio sp. TB
29.1917	-0.0154689	0.0110771	-1.39647	0.162573	0.455869	k__Bacteria	p__Firmicutes	c__Clostridia	o__Clostridiales	f__Oscillospiraceae	g__Oscillibacter	s__Oscillibacter sp. KLE 1728
42.1472	-0.0234031	0.0167597	-1.39639	0.162597	0.455869	k__Bacteria	p__Bacteroidetes	c__Bacteroidia	o__Bacteroidales	f__Bacteroidaceae	g__Bacteroides	s__Bacteroides finegoldii CAG:203
351.816	0.0253221	0.0181593	1.39444	0.163184	0.45702	k__Bacteria	p__Firmicutes	c__Firmicutes__na	o__Firmicutes__na	f__Firmicutes__na	g__Firmicutes__na	s__Firmicutes bacterium CAG:272
526.008	-0.0336783	0.0241842	-1.39258	0.163747	0.458105	k__Bacteria	p__Bacteroidetes	c__Bacteroidia	o__Bacteroidales	f__Bacteroidaceae	g__Bacteroides	s__Bacteroides sp. CAG:98
73.3833	-0.0379092	0.0272376	-1.3918	0.163984	0.458273	k__Bacteria	p__Firmicutes	c__Clostridia	o__Clostridiales	f__Clostridiaceae	g__Clostridium	s__Clostridium sp. CAG:288
6.01293	-0.0385168	0.0276984	-1.39058	0.164353	0.458473	k__Bacteria	p__Firmicutes	c__Bacilli	o__Lactobacillales	f__Lactobacillaceae	g__Lactobacillus	s__Lactobacillus casei
2.10082	-0.0237369	0.0170721	-1.39039	0.16441	0.458473	k__Bacteria	p__Bacteroidetes	c__Bacteroidia	o__Marinilabiliales	f__Marinilabiliaceae	g__Alkaliflexus	s__Alkaliflexus imshenetskii
4.22308	0.0178967	0.01288	1.3895	0.164682	0.458473	k__Bacteria	p__Proteobacteria	c__Alphaproteobacteria	o__Alphaproteobacteria__uc	f__Alphaproteobacteria__uc	g__Alphaproteobacteria__uc	s__Alphaproteobacteria__uc
2.06042	-0.0366411	0.026375	-1.38924	0.164761	0.458473	k__Bacteria	p__Firmicutes	c__Bacilli	o__Lactobacillales	f__Lactobacillaceae	g__Lactobacillus	s__Lactobacillus coryniformis
2.72266	-0.0722842	0.0520783	-1.38799	0.16514	0.459036	k__Bacteria	p__Proteobacteria	c__Gammaproteobacteria	o__Enterobacterales	f__Hafniaceae	g__Hafniaceae__uc	s__Hafniaceae__uc
690.143	-0.0121363	0.0087499	-1.38702	0.165435	0.459365	k__Bacteria	p__Firmicutes	c__Clostridia	o__Clostridiales	f__Oscillospiraceae	g__Oscillibacter	s__uncultured Oscillibacter sp.
136.357	-0.028676	0.0206973	-1.3855	0.1659	0.459885	k__Bacteria	p__Firmicutes	c__Clostridia	o__Clostridiales	f__Clostridiaceae	g__Clostridium	s__Clostridium celatum
4808.37	0.0180056	0.0130023	1.3848	0.166113	0.459885	k__Bacteria	p__Firmicutes	c__Clostridia	o__Clostridiales	f__Lachnospiraceae	g__Anaerostipes	s__Anaerostipes hadrus
3.33001	-0.0239253	0.0172792	-1.38463	0.166165	0.459885	k__Bacteria	p__Firmicutes	c__Negativicutes	o__Selenomonadales	f__Selenomonadaceae	g__Selenomonas	s__Selenomonas artemidis
11.1554	-0.0196402	0.01419	-1.38409	0.16633	0.459885	k__Bacteria	p__Actinobacteria	c__Actinobacteria	o__Actinomycetales	f__Actinomycetaceae	g__Actinomyces	s__Actinomyces massiliensis
53362.2	-0.0321677	0.0232686	-1.38245	0.166832	0.460061	k__Bacteria	p__Bacteroidetes	c__Bacteroidia	o__Bacteroidales	f__Prevotellaceae	g__Prevotella	s__Prevotella__uc
22.8464	-0.0234886	0.0169944	-1.38213	0.16693	0.460061	k__Bacteria	p__Bacteroidetes	c__Bacteroidia	o__Bacteroidales	f__Bacteroidales__na	g__Bacteroidales__na	s__Bacteroidales bacterium KHT7
5.11158	0.0177319	0.0128367	1.38135	0.167172	0.460061	k__Bacteria	p__Actinobacteria	c__Actinobacteria	o__Corynebacteriales	f__Corynebacteriaceae	g__Corynebacterium	s__Corynebacterium__uc
4385.09	0.0254995	0.018462	1.38119	0.16722	0.460061	k__Bacteria	p__Firmicutes	c__Clostridia	o__Clostridiales	f__Ruminococcaceae	g__Ruminococcus	s__Ruminococcus lactaris
5.78578	0.0220558	0.0159709	1.381	0.167279	0.460061	k__Bacteria	p__Firmicutes	c__Clostridia	o__Clostridiales	f__Lachnospiraceae	g__Butyrivibrio	s__Butyrivibrio sp. WCE2006
67188.4	-0.0125353	0.00909251	-1.37864	0.168006	0.461213	k__Bacteria	p__Firmicutes	c__Clostridia	o__Clostridiales	f__Ruminococcaceae	g__Faecalibacterium	s__Faecalibacterium prausnitzii
60.0305	-0.0366247	0.0265687	-1.37849	0.168053	0.461213	k__Bacteria	p__Bacteroidetes	c__Bacteroidia	o__Bacteroidales	f__Prevotellaceae	g__Prevotella	s__Prevotella sp. AG:487_50_53
6.13537	0.036445	0.0264578	1.37747	0.168366	0.461585	k__Bacteria	p__Firmicutes	c__Erysipelotrichia	o__Erysipelotrichales	f__Erysipelotrichaceae	g__Turicibacter	s__Turicibacter sp. H121
290066	-0.00905372	0.00657733	-1.3765	0.168666	0.461658	k__Bacteria	p__Firmicutes	c__Clostridia	o__Clostridiales	f__Clostridiales__uc	g__Clostridiales__uc	s__Clostridiales__uc
3.11564	-0.0228887	0.0166313	-1.37624	0.168747	0.461658	k__Bacteria	p__Proteobacteria	c__Betaproteobacteria	o__Neisseriales	f__Neisseriaceae	g__Neisseria	s__Neisseria__uc
33.0662	-0.0147131	0.0106978	-1.37534	0.169025	0.46193	k__Bacteria	p__Firmicutes	c__Clostridia	o__Clostridiales	f__Lachnospiraceae	g__Coprococcus	s__Coprococcus comes CAG:19
24.094	0.00835221	0.00607569	1.37469	0.169226	0.461995	k__Bacteria	p__Firmicutes	c__Clostridia	o__Clostridiales	f__Lachnospiraceae	g__Anaerocolumna	s__Anaerocolumna xylanovorans
3.36714	-0.0394064	0.028688	-1.37362	0.169561	0.462422	k__Bacteria	p__Firmicutes	c__Bacilli	o__Lactobacillales	f__Enterococcaceae	g__Enterococcus	s__Enterococcus durans
0.624196	0.035739	0.0260305	1.37296	0.169763		k__Bacteria	p__Firmicutes	c__Bacilli	o__Lactobacillales	f__Lactobacillaceae	g__Lactobacillus	s__Lactobacillus pasteurii
17400.3	0.0144367	0.0105164	1.37277	0.169823	0.462653	k__Bacteria	p__Firmicutes	c__Clostridia	o__Clostridiales	f__Clostridiaceae	g__Clostridium	s__Clostridium__uc
883.619	0.0328578	0.0239502	1.37192	0.170088	0.462888	k__Bacteria	p__Firmicutes	c__Clostridia	o__Clostridiales	f__Ruminococcaceae	g__Ruminococcus	s__Ruminococcus sp. CAG:330
150.54	-0.00625546	0.00456462	-1.37042	0.170555	0.463674	k__Bacteria	p__Firmicutes	c__Clostridia	o__Clostridiales	f__Lachnospiraceae	g__Dorea	s__Dorea sp. 5-2
253.679	0.0168839	0.0123327	1.36903	0.17099	0.46437	k__Bacteria	p__Firmicutes	c__Clostridia	o__Clostridiales	f__Clostridiaceae	g__Clostridium	s__Clostridium sp. SS2/1
0.632405	-0.0492373	0.0359715	-1.36879	0.171065		k__Bacteria	p__Firmicutes	c__Bacilli	o__Bacillales	f__Paenibacillaceae	g__Paenibacillus	s__Paenibacillus sp. O199
187.475	-0.0114343	0.00836	-1.36774	0.171393	0.464687	k__Bacteria	p__Firmicutes	c__Clostridia	o__Clostridiales	f__Lachnospiraceae	g__Dorea	s__Dorea sp. AGR2135
53.8759	-0.00970364	0.00710063	-1.36659	0.171754	0.464687	k__Bacteria	p__Firmicutes	c__Clostridia	o__Clostridiales	f__Eubacteriaceae	g__Eubacterium	s__[Eubacterium] cellulosolvens
39.1757	-0.0144317	0.0105612	-1.36648	0.171788	0.464687	k__Bacteria	p__Actinobacteria	c__Coriobacteriia	o__Coriobacteriales	f__Coriobacteriaceae	g__Collinsella	s__Collinsella tanakaei
1558.84	0.0326819	0.0239187	1.36637	0.171821	0.464687	k__Bacteria	p__Actinobacteria	c__Actinobacteria	o__Bifidobacteriales	f__Bifidobacteriales__uc	g__Bifidobacteriales__uc	s__Bifidobacteriales__uc
8.32197	0.00937303	0.00687512	1.36333	0.17278	0.46631	k__Bacteria	p__Firmicutes	c__Clostridia	o__Clostridiales	f__Ruminococcaceae	g__Ruminococcaceae__na	s__Ruminococcaceae bacterium YAD3003
5.59909	-0.0238586	0.0175003	-1.36332	0.17278	0.46631	k__Bacteria	p__Firmicutes	c__Negativicutes	o__Selenomonadales	f__Selenomonadaceae	g__Selenomonas	s__Selenomonas sp. AE3005
16.0891	0.024751	0.0181634	1.36268	0.172983	0.466374	k__Bacteria	p__Firmicutes	c__Clostridia	o__Clostridiales	f__Peptostreptococcaceae	g__Romboutsia	s__[Clostridium] dakarense
5.677	0.0123651	0.00908154	1.36157	0.173334	0.466835	k__Bacteria	p__Firmicutes	c__Clostridia	o__Clostridiales	f__Eubacteriaceae	g__Acetobacterium	s__Acetobacterium wieringae
2.33856	0.0180206	0.013249	1.36015	0.173782	0.467557	k__Bacteria	p__Firmicutes	c__Bacilli	o__Bacillales	f__Paenibacillaceae	g__Gorillibacterium	s__Gorillibacterium massiliense
0.945621	0.0557248	0.0410048	1.35898	0.174152	0.468066	k__Bacteria	p__Fusobacteria	c__Fusobacteriia	o__Fusobacteriales	f__Leptotrichiaceae	g__Leptotrichia	s__Leptotrichia sp. oral taxon 879
11.375	0.0376734	0.0277505	1.35758	0.174599	0.468539	k__Bacteria	p__Lentisphaerae	c__Lentisphaerae__na	o__Lentisphaerae__na	f__Lentisphaerae__na	g__Lentisphaerae__na	s__Lentisphaerae bacterium GWF2_44_16
9.44188	0.00937076	0.00690401	1.35729	0.174688	0.468539	k__Bacteria	p__Firmicutes	c__Clostridia	o__Clostridiales	f__Lachnospiraceae	g__Cellulosilyticum	s__Cellulosilyticum sp. I15G10I2
21.842	0.0121126	0.00892807	1.35669	0.17488	0.468569	k__Bacteria	p__Firmicutes	c__Clostridia	o__Clostridiales	f__Lachnospiraceae	g__Lachnospira	s__Lachnospira__uc
434.661	0.0264953	0.0195472	1.35545	0.175274	0.469142	k__Bacteria	p__Firmicutes	c__Clostridia	o__Clostridiales	f__Eubacteriaceae	g__Eubacterium	s__Eubacterium eligens CAG:72
41.0674	0.0135013	0.00997561	1.35344	0.175916	0.469749	k__Bacteria	p__Firmicutes	c__Clostridia	o__Clostridiales	f__Eubacteriaceae	g__Anaerofustis	s__Anaerofustis stercorihominis
12.0073	-0.0274922	0.0203305	-1.35226	0.176291	0.469749	k__Bacteria	p__Firmicutes	c__Bacilli	o__Lactobacillales	f__Streptococcaceae	g__Streptococcus	s__Streptococcus cristatus
25.2438	0.00783067	0.00579181	1.35202	0.176367	0.469749	k__Bacteria	p__Firmicutes	c__Bacilli	o__Bacillales	f__Bacillaceae	g__Bacillus	s__Bacillus__uc
53.8532	-0.0153093	0.0113242	-1.35191	0.176404	0.469749	k__Bacteria	p__Bacteroidetes	c__Bacteroidia	o__Bacteroidales	f__Odoribacteraceae	g__Butyricimonas	s__Butyricimonas sp. Marseille-P2440
2.325	0.0219608	0.0162495	1.35148	0.176542	0.469749	k__Bacteria	p__Firmicutes	c__Bacilli	o__Bacillales	f__Listeriaceae	g__Listeria	s__Listeria grayi
4.72667	-0.0336564	0.0249082	-1.35122	0.176625	0.469749	k__Bacteria	p__Bacteroidetes	c__Bacteroidia	o__Bacteroidales	f__Prevotellaceae	g__Prevotella	s__Prevotella sp. khp7
153.291	-0.0307443	0.0227844	-1.34935	0.177223	0.469749	k__Bacteria	p__Bacteroidetes	c__Bacteroidia	o__Bacteroidales	f__Bacteroidaceae	g__Bacteroides	s__Bacteroides thetaiotaomicron CAG:40
4.90898	0.0164334	0.0121812	1.34908	0.177311	0.469749	k__Bacteria	p__Firmicutes	c__Clostridia	o__Clostridiales	f__Clostridiaceae	g__Clostridium	s__Clostridium jeddahense
152.87	0.0332776	0.0246705	1.34888	0.177374	0.469749	k__Bacteria	p__Firmicutes	c__Clostridia	o__Clostridiales	f__Clostridiaceae	g__Clostridium	s__Clostridium sp. CAG:307_30_263
431.748	0.0299925	0.0222358	1.34884	0.177389	0.469749	k__Bacteria	p__Proteobacteria	c__Alphaproteobacteria	o__Rhodospirillales	f__Acetobacteraceae	g__Acetobacter	s__Acetobacter sp. 46_36
844.765	-0.0175312	0.0130002	-1.34853	0.177489	0.469749	k__Bacteria	p__Firmicutes	c__Clostridia	o__Clostridiales	f__Oscillospiraceae	g__Oscillospiraceae__uc	s__Oscillospiraceae__uc
293.047	0.0262907	0.0195109	1.34749	0.177823	0.470154	k__Bacteria	p__Firmicutes	c__Firmicutes__na	o__Firmicutes__na	f__Firmicutes__na	g__Firmicutes__na	s__Firmicutes bacterium CAG:270
2196.01	0.0241342	0.0179845	1.34195	0.179614	0.474096	k__Bacteria	p__Firmicutes	c__Clostridia	o__Clostridiales	f__Ruminococcaceae	g__Faecalibacterium	s__Faecalibacterium sp. CAG:74_58_120
13.0675	0.0374423	0.0279056	1.34175	0.179679	0.474096	k__Bacteria	p__Proteobacteria	c__Alphaproteobacteria	o__Rhodospirillales	f__Rhodospirillales__uc	g__Rhodospirillales__uc	s__Rhodospirillales__uc
271.012	-0.0322289	0.0240353	-1.3409	0.179952	0.474335	k__Bacteria	p__Bacteroidetes	c__Bacteroidia	o__Bacteroidales	f__Prevotellaceae	g__Prevotella	s__Prevotella albensis
91.8151	-0.028105	0.0209766	-1.33983	0.180302	0.474335	k__Bacteria	p__Bacteroidetes	c__Bacteroidia	o__Bacteroidales	f__Prevotellaceae	g__Prevotella	s__Prevotella oryzae
1.03062	0.0312802	0.0233472	1.33978	0.180317	0.474335	k__Bacteria	p__Firmicutes	c__Bacilli	o__Bacillales	f__Paenibacillaceae	g__Paenibacillus	s__Paenibacillus lautus
19.7416	-0.0126829	0.00948446	-1.33723	0.181149	0.476042	k__Bacteria	p__Firmicutes	c__Clostridia	o__Clostridiales	f__Clostridiales Family XIII. Incertae Sedis	g__Clostridiales Family XIII. Incertae Sedis__na	s__[Eubacterium] brachy
40.3139	-0.0138045	0.0103284	-1.33656	0.181365	0.476129	k__Bacteria	p__Bacteroidetes	c__Bacteroidia	o__Bacteroidales	f__Bacteroidaceae	g__Bacteroides	s__Bacteroides ihuae
3.37457	0.0164446	0.0123122	1.33564	0.181668	0.476325	k__Bacteria	p__Firmicutes	c__Bacilli	o__Bacillales	f__Paenibacillaceae	g__Paenibacillus	s__Paenibacillus selenitireducens
1.31	-0.077454	0.0580133	-1.33511	0.181842	0.476325	k__Bacteria	p__Proteobacteria	c__Gammaproteobacteria	o__Enterobacterales	f__Enterobacteriaceae	g__Klebsiella	s__Klebsiella sp. RIT-PI-d
67.4947	0.0118141	0.00885401	1.33432	0.182098	0.476325	k__Bacteria	p__Firmicutes	c__Clostridia	o__Clostridiales	f__Eubacteriaceae	g__Eubacterium	s__Eubacterium coprostanoligenes
1.90702	-0.0304972	0.0228601	-1.33408	0.182179	0.476325	k__Bacteria	p__Firmicutes	c__Bacilli	o__Lactobacillales	f__Carnobacteriaceae	g__Granulicatella	s__Granulicatella sp. HMSC30F09
4.11169	0.0344528	0.0258357	1.33354	0.182356	0.476325	k__Bacteria	p__Firmicutes	c__Negativicutes	o__Veillonellales	f__Veillonellaceae	g__Veillonella	s__Veillonella sp. AS16
164.193	-0.0259396	0.0194849	-1.33127	0.183101	0.47779	k__Bacteria	p__Bacteroidetes	c__Bacteroidia	o__Bacteroidales	f__Bacteroidaceae	g__Bacteroides	s__Bacteroides sp. 14(A)
2.68781	0.0292741	0.0220141	1.32979	0.183588	0.478425	k__Bacteria	p__Firmicutes	c__Bacilli	o__Bacillales	f__Sporolactobacillaceae	g__Sporolactobacillus	s__Sporolactobacillus laevolacticus
193.909	-0.0226802	0.0170603	-1.32941	0.183712	0.478425	k__Bacteria	p__Bacteroidetes	c__Bacteroidia	o__Bacteroidales	f__Prevotellaceae	g__Prevotella	s__Prevotella ruminicola
2.74582	-0.0393724	0.0296369	-1.32849	0.184016	0.478736	k__Bacteria	p__Firmicutes	c__Bacilli	o__Lactobacillales	f__Streptococcaceae	g__Streptococcus	s__Streptococcus macedonicus
3.94626	0.0487189	0.0366908	1.32782	0.184236	0.478829	k__Bacteria	p__Proteobacteria	c__Gammaproteobacteria	o__Pasteurellales	f__Pasteurellaceae	g__Haemophilus	s__Haemophilus sp. HMSC71H05
19.2395	0.0330825	0.0250083	1.32286	0.185882	0.482626	k__Bacteria	p__Firmicutes	c__Bacilli	o__Lactobacillales	f__Streptococcaceae	g__Streptococcus	s__Streptococcus sp. F0442
12.2545	-0.0313862	0.0237397	-1.3221	0.186136	0.482802	k__Bacteria	p__Bacteroidetes	c__Bacteroidia	o__Bacteroidales	f__Prevotellaceae	g__Prevotella	s__Prevotella sp. S7 MS 2
51.5985	0.0285938	0.0216391	1.32139	0.18637	0.482824	k__Bacteria	p__Firmicutes	c__Negativicutes	o__Veillonellales	f__Veillonellaceae	g__Veillonella	s__Veillonella dispar
1.96185	-0.0310261	0.0234876	-1.32096	0.186516	0.482824	k__Bacteria	p__Firmicutes	c__Bacilli	o__Lactobacillales	f__Carnobacteriaceae	g__Granulicatella	s__Granulicatella elegans
3.23364	0.0162766	0.0123334	1.31972	0.18693	0.483414	k__Bacteria	p__Firmicutes	c__Clostridia	o__Clostridiales	f__Clostridiales__na	g__Clostridiales__na	s__Clostridiales bacterium GWB2_37_7
5.08956	0.0147688	0.0112101	1.31745	0.187687	0.48489	k__Bacteria	p__Firmicutes	c__Clostridia	o__Clostridiales	f__Clostridiaceae	g__Clostridium	s__Clostridium sp. HMP27
499.366	0.0103682	0.00787772	1.31614	0.188128	0.485545	k__Bacteria	p__Firmicutes	c__Firmicutes__na	o__Firmicutes__na	f__Firmicutes__na	g__Firmicutes__na	s__Firmicutes bacterium CAG:552_39_19
3.95184	-0.019604	0.0149213	-1.31383	0.188905	0.486691	k__Bacteria	p__Firmicutes	c__Clostridia	o__Clostridiales	f__Lachnospiraceae	g__Butyrivibrio	s__Butyrivibrio sp. NC2007
43.5924	-0.0129963	0.00990114	-1.3126	0.189317	0.486691	k__Bacteria	p__Firmicutes	c__Clostridia	o__Clostridiales	f__Clostridiales__na	g__Clostridiales__na	s__Clostridiales bacterium VE202-06
816.306	0.0197892	0.0150806	1.31223	0.189444	0.486691	k__Bacteria	p__Bacteroidetes	c__Bacteroidia	o__Bacteroidales	f__Porphyromonadaceae	g__Barnesiella	s__Barnesiella intestinihominis
1.7131	-0.0446963	0.0340628	-1.31217	0.189462	0.486691	k__Bacteria	p__Actinobacteria	c__Actinobacteria	o__Actinomycetales	f__Actinomycetaceae	g__Actinomyces	s__Actinomyces timonensis
163.761	-0.0121222	0.0092392	-1.31204	0.189508	0.486691	k__Bacteria	p__Firmicutes	c__Bacilli	o__Lactobacillales	f__Enterococcaceae	g__Enterococcus	s__Enterococcus faecium
30.0681	0.0461264	0.0351879	1.31086	0.189905	0.487229	k__Bacteria	p__Firmicutes	c__Clostridia	o__Clostridiales	f__Clostridiaceae	g__Clostridium	s__Clostridium sp. CAG:609
18.4816	-0.0112578	0.00859831	-1.3093	0.190433	0.488102	k__Bacteria	p__Firmicutes	c__Clostridia	o__Clostridiales	f__Lachnospiraceae	g__Lachnospiraceae__na	s__Lachnospiraceae bacterium MC2017
2.69217	-0.0252885	0.0193274	-1.30843	0.190728	0.488232	k__Bacteria	p__Firmicutes	c__Bacilli	o__Lactobacillales	f__Streptococcaceae	g__Lactococcus	s__Lactococcus piscium
76.6064	-0.0145189	0.0111019	-1.30779	0.190946	0.488232	k__Bacteria	p__Actinobacteria	c__Coriobacteriia	o__Eggerthellales	f__Eggerthellaceae	g__Gordonibacter	s__Gordonibacter sp. Marseille-P3078
1.1334	-0.0450896	0.0344857	-1.30749	0.191047	0.488232	k__Bacteria	p__Bacteroidetes	c__Flavobacteriia	o__Flavobacteriales	f__Flavobacteriaceae	g__Capnocytophaga	s__Capnocytophaga canis
229.975	0.00902505	0.00690626	1.30679	0.191283	0.488353	k__Bacteria	p__Firmicutes	c__Clostridia	o__Clostridiales	f__Oscillospiraceae	g__Oscillibacter	s__Oscillibacter sp. 1-3
9.80183	0.010773	0.00825052	1.30573	0.191643	0.488653	k__Bacteria	p__Proteobacteria	c__Alphaproteobacteria	o__Rhodospirillales	f__Rhodospirillaceae	g__Pararhodospirillum	s__Pararhodospirillum photometricum
440.461	0.0101231	0.00776132	1.30431	0.192129	0.488653	k__Bacteria	p__Firmicutes	c__Clostridia	o__Clostridiales	f__Ruminococcaceae	g__Anaerotruncus	s__Anaerotruncus colihominis
27.1913	-0.0142067	0.0108975	-1.30367	0.192347	0.488653	k__Bacteria	p__Bacteroidetes	c__Bacteroidia	o__Bacteroidales	f__Porphyromonadaceae	g__Tannerella	s__Tannerella forsythia
20.835	-0.00989176	0.0075888	-1.30347	0.192415	0.488653	k__Bacteria	p__Firmicutes	c__Clostridia	o__Clostridiales	f__Clostridiales Family XIII. Incertae Sedis	g__Clostridiales Family XIII. Incertae Sedis__na	s__[Eubacterium] sulci
1.27269	-0.0289386	0.0222043	-1.30329	0.192477	0.488653	k__Bacteria	p__Firmicutes	c__Bacilli	o__Lactobacillales	f__Lactobacillaceae	g__Lactobacillus	s__Lactobacillus gigeriorum
89.6585	-0.0135013	0.0103606	-1.30314	0.192528	0.488653	k__Bacteria	p__Actinobacteria	c__Coriobacteriia	o__Coriobacteriales	f__Coriobacteriaceae	g__Collinsella	s__Collinsella stercoris
34.0206	0.0396775	0.0304936	1.30118	0.193198	0.489874	k__Bacteria	p__Firmicutes	c__Clostridia	o__Clostridiales	f__Lachnospiraceae	g__Lachnospiraceae__na	s__Lachnospiraceae bacterium AC2012
290.885	-0.01247	0.00962161	-1.29604	0.19496	0.493861	k__Bacteria	p__Firmicutes	c__Clostridia	o__Clostridiales	f__Lachnospiraceae	g__Dorea	s__uncultured Dorea sp.
827.307	0.032361	0.0250014	1.29437	0.195538	0.494843	k__Bacteria	p__Firmicutes	c__Bacilli	o__Lactobacillales	f__Lactobacillaceae	g__Lactobacillus	s__Lactobacillus__uc
3.59978	0.0131628	0.0101988	1.29062	0.196834	0.497273	k__Bacteria	p__Firmicutes	c__Clostridia	o__Clostridiales	f__Peptococcaceae	g__Desulfosporosinus	s__Desulfosporosinus youngiae
1.84494	0.0748364	0.0579907	1.29049	0.196881	0.497273	k__Bacteria	p__Firmicutes	c__Bacilli	o__Lactobacillales	f__Leuconostocaceae	g__Leuconostoc	s__Leuconostoc sp. DORA_2
1.82124	0.019932	0.0154665	1.28872	0.197495	0.49834	k__Bacteria	p__Firmicutes	c__Clostridia	o__Clostridiales	f__Peptococcaceae	g__Peptococcaceae__na	s__Peptococcaceae bacterium BICA1-8
6.75349	0.013849	0.0107679	1.28614	0.198395	0.499793	k__Bacteria	p__Firmicutes	c__Clostridia	o__Clostridiales	f__Peptococcaceae	g__Dehalobacter	s__Dehalobacter__uc
2.15957	0.0235052	0.0182814	1.28575	0.198531	0.499793	k__Bacteria	p__Actinobacteria	c__Coriobacteriia	o__Coriobacteriales	f__Coriobacteriaceae	g__Coriobacteriaceae__na	s__Coriobacteriaceae bacterium EMTCatB1
3.74404	0.0131803	0.0102538	1.28541	0.198648	0.499793	k__Bacteria	p__Firmicutes	c__Clostridia	o__Clostridiales	f__Clostridiaceae	g__Clostridiisalibacter	s__Clostridiisalibacter paucivorans
2.42007	0.0165827	0.0129072	1.28477	0.198874	0.499878	k__Bacteria	p__Firmicutes	c__Clostridia	o__Clostridiales	f__Clostridiaceae	g__Clostridium	s__Clostridium algidicarnis
4.6063	-0.0700901	0.0546261	-1.28309	0.199462	0.500726	k__Bacteria	p__Proteobacteria	c__Gammaproteobacteria	o__Enterobacterales	f__Enterobacteriaceae	g__Citrobacter	s__Citrobacter braakii
56.6033	-0.0217945	0.0169971	-1.28225	0.199757	0.500726	k__Bacteria	p__Bacteroidetes	c__Bacteroidia	o__Bacteroidales	f__Bacteroidaceae	g__Bacteroides	s__Bacteroides sp. CAG:189
2.38355	0.0596013	0.0464854	1.28215	0.19979	0.500726	k__Bacteria	p__Firmicutes	c__Bacilli	o__Lactobacillales	f__Lactobacillaceae	g__Lactobacillus	s__Lactobacillus taiwanensis
275.357	0.0245896	0.0192018	1.28059	0.200339	0.501154	k__Bacteria	p__Firmicutes	c__Bacilli	o__Lactobacillales	f__Streptococcaceae	g__Lactococcus	s__Lactococcus lactis
5.50398	0.0160552	0.0125376	1.28057	0.200346	0.501154	k__Bacteria	p__Proteobacteria	c__Deltaproteobacteria	o__Desulfobacterales	f__Desulfobacteraceae	g__Desulfobacterium	s__uncultured Desulfobacterium sp.
59.5973	0.0106047	0.00828826	1.27949	0.200725	0.501324	k__Bacteria	p__Firmicutes	c__Clostridia	o__Clostridiales	f__Ruminococcaceae	g__Ruminiclostridium	s__[Clostridium] viride
379.95	0.0202772	0.0158505	1.27928	0.2008	0.501324	k__Bacteria	p__Firmicutes	c__Clostridia	o__Clostridiales	f__Peptostreptococcaceae	g__Peptostreptococcaceae__uc	s__Peptostreptococcaceae__uc
1274.44	0.0278254	0.0217838	1.27734	0.201482	0.501567	k__Bacteria	p__Firmicutes	c__Clostridia	o__Clostridiales	f__Ruminococcaceae	g__Ruminococcus	s__Ruminococcus bicirculans
3.2004	0.0155762	0.0121947	1.27729	0.201499	0.501567	k__Bacteria	p__Spirochaetes	c__Spirochaetes__uc	o__Spirochaetes__uc	f__Spirochaetes__uc	g__Spirochaetes__uc	s__Spirochaetes__uc
16.9703	-0.0145603	0.0114016	-1.27704	0.201587	0.501567	k__Bacteria	p__Firmicutes	c__Erysipelotrichia	o__Erysipelotrichales	f__Erysipelotrichaceae	g__Dubosiella	s__Dubosiella newyorkensis
6.55627	-0.0112937	0.00884523	-1.27681	0.201669	0.501567	k__Bacteria	p__Firmicutes	c__Erysipelotrichia	o__Erysipelotrichales	f__Erysipelotrichaceae	g__Erysipelotrichaceae__na	s__Erysipelotrichaceae bacterium MTC7
6515.48	0.0308204	0.0241518	1.27611	0.201916	0.501701	k__Bacteria	p__Firmicutes	c__Firmicutes__na	o__Firmicutes__na	f__Firmicutes__na	g__Firmicutes__na	s__Firmicutes bacterium CAG:176
522.495	-0.0119768	0.00941978	-1.27145	0.203567	0.50532	k__Bacteria	p__Firmicutes	c__Clostridia	o__Clostridiales	f__Lachnospiraceae	g__Blautia	s__Blautia massiliensis
0.910588	-0.0636587	0.0501	-1.27063	0.203859	0.505548	k__Bacteria	p__Bacteria__na	c__Bacteria__na	o__Bacteria__na	f__Bacteria__na	g__Bacteria__na	s__uncultured bacterium fosmid pJB71G8
3.19396	-0.024197	0.0190512	-1.2701	0.204048	0.505548	k__Bacteria	p__Bacteroidetes	c__Bacteroidia	o__Bacteroidales	f__Porphyromonadaceae	g__Porphyromonas	s__Porphyromonas sp. oral taxon 278
135.015	0.0178283	0.0140703	1.26709	0.205122	0.507343	k__Bacteria	p__Bacteria__na	c__Bacteria__na	o__Bacteria__na	f__Bacteria__na	g__Bacteria__na	s__bacterium LF-3
27.8525	-0.0248356	0.0196073	-1.26665	0.205281	0.507343	k__Bacteria	p__Bacteroidetes	c__Bacteroidia	o__Bacteroidales	f__Bacteroidaceae	g__Bacteroides	s__Bacteroides intestinalis CAG:564
54.2092	-0.0263888	0.0208371	-1.26643	0.205358	0.507343	k__Bacteria	p__Firmicutes	c__Negativicutes	o__Acidaminococcales	f__Acidaminococcaceae	g__Phascolarctobacterium	s__Phascolarctobacterium__uc
7.02149	-0.0292068	0.0230814	-1.26538	0.205735	0.507792	k__Bacteria	p__Firmicutes	c__Clostridia	o__Clostridiales	f__Clostridiaceae	g__Clostridium	s__Clostridium saudiense
149.482	0.00800172	0.00632662	1.26477	0.205953	0.507849	k__Bacteria	p__Firmicutes	c__Clostridia	o__Clostridiales	f__Clostridiaceae	g__Clostridium	s__Clostridium sp. Marseille-P3244
423.622	0.0230043	0.018228	1.26203	0.206939	0.509068	k__Bacteria	p__Firmicutes	c__Clostridia	o__Clostridiales	f__Peptostreptococcaceae	g__Romboutsia	s__Romboutsia__uc
39.2318	-0.0199606	0.0158197	-1.26175	0.207037	0.509068	k__Bacteria	p__Firmicutes	c__Negativicutes	o__Veillonellales	f__Veillonellaceae	g__Megasphaera	s__Megasphaera sp. MJR8396C
17.2339	0.0120228	0.00953412	1.26103	0.207297	0.509068	k__Bacteria	p__Firmicutes	c__Erysipelotrichia	o__Erysipelotrichales	f__Erysipelotrichaceae	g__Erysipelatoclostridium	s__[Clostridium] cocleatum
29.1159	0.00651173	0.00516562	1.26059	0.207457	0.509068	k__Bacteria	p__Firmicutes	c__Clostridia	o__Clostridiales	f__Lachnospiraceae	g__Lachnospiraceae__na	s__Lachnospiraceae bacterium NK3A20
32.3686	-0.011739	0.00931412	-1.26035	0.207544	0.509068	k__Bacteria	p__Actinobacteria	c__Coriobacteriia	o__Coriobacteriales	f__Atopobiaceae	g__Atopobium	s__Atopobium__uc
63.1187	-0.0134543	0.0106769	-1.26013	0.207623	0.509068	k__Bacteria	p__Firmicutes	c__Erysipelotrichia	o__Erysipelotrichales	f__Erysipelotrichaceae	g__Solobacterium	s__Solobacterium moorei
9.30339	0.0123382	0.0098054	1.2583	0.208282	0.509891	k__Bacteria	p__Firmicutes	c__Clostridia	o__Clostridiales	f__Lachnospiraceae	g__Butyrivibrio	s__Butyrivibrio sp. INlla14
5.57928	0.0347086	0.0275878	1.25811	0.208351	0.509891	k__Bacteria	p__Verrucomicrobia	c__Verrucomicrobia__uc	o__Verrucomicrobia__uc	f__Verrucomicrobia__uc	g__Verrucomicrobia__uc	s__Verrucomicrobia__uc
135.306	-0.0218315	0.0173704	-1.25682	0.20882	0.510557	k__Bacteria	p__Firmicutes	c__Negativicutes	o__Veillonellales	f__Veillonellaceae	g__Veillonellaceae__uc	s__Veillonellaceae__uc
13.4295	-0.0135029	0.0107781	-1.25281	0.210273	0.513628	k__Bacteria	p__Firmicutes	c__Clostridia	o__Clostridiales	f__Clostridiaceae	g__Clostridium	s__Clostridium hathewayi CAG:224
9.62728	0.00950018	0.00759381	1.25104	0.210919	0.514722	k__Bacteria	p__Firmicutes	c__Clostridia	o__Clostridiales	f__Defluviitaleaceae	g__Defluviitalea	s__Defluviitalea phaphyphila
10.3961	-0.0135419	0.0108406	-1.24918	0.211599	0.515897	k__Bacteria	p__Firmicutes	c__Erysipelotrichia	o__Erysipelotrichales	f__Erysipelotrichaceae	g__Coprobacillus	s__Coprobacillus sp. 29_1
15.0431	0.0202208	0.0161982	1.24833	0.211909	0.516168	k__Bacteria	p__Firmicutes	c__Negativicutes	o__Acidaminococcales	f__Acidaminococcaceae	g__Acidaminococcus	s__Acidaminococcus sp. CAG:917
87.6602	-0.0201865	0.0161916	-1.24673	0.212498	0.517117	k__Bacteria	p__Bacteroidetes	c__Bacteroidia	o__Bacteroidales	f__Rikenellaceae	g__Alistipes	s__Alistipes finegoldii CAG:68
160.701	0.0164593	0.0132133	1.24566	0.212888	0.517582	k__Bacteria	p__Firmicutes	c__Erysipelotrichia	o__Erysipelotrichales	f__Erysipelotrichaceae	g__Merdibacter	s__Merdibacter massiliensis
3.03359	0.0181357	0.0145767	1.24416	0.213442	0.517607	k__Bacteria	p__Proteobacteria	c__Deltaproteobacteria	o__Desulfovibrionales	f__Desulfovibrionaceae	g__Desulfovibrio	s__Desulfovibrio litoralis
1.19312	0.0310654	0.0249741	1.2439	0.213535	0.517607	k__Bacteria	p__Firmicutes	c__Bacilli	o__Bacillales	f__Bacillaceae	g__Psychrobacillus	s__Psychrobacillus psychrodurans
3.48112	0.0123568	0.0099407	1.24305	0.21385	0.517607	k__Bacteria	p__Firmicutes	c__Clostridia	o__Clostridiales	f__Peptococcaceae	g__Desulfosporosinus	s__Desulfosporosinus lacus
1.56641	0.0213005	0.017138	1.24288	0.213911	0.517607	k__Bacteria	p__Bacteria__na	c__Bacteria__na	o__Haloplasmatales	f__Haloplasmataceae	g__Haloplasma	s__Haloplasma contractile
506.954	0.0210676	0.0169531	1.2427	0.21398	0.517607	k__Bacteria	p__Firmicutes	c__Clostridia	o__Clostridiales	f__Ruminococcaceae	g__Anaerotruncus	s__Anaerotruncus sp. CAG:390
3.75693	0.022798	0.0183501	1.24239	0.214093	0.517607	k__Bacteria	p__Firmicutes	c__Bacilli	o__Lactobacillales	f__Aerococcaceae	g__Facklamia	s__Facklamia languida
118.944	-0.0170193	0.0137177	-1.24069	0.214721	0.518342	k__Bacteria	p__Firmicutes	c__Clostridia	o__Clostridiales	f__Clostridiales__na	g__Clostridiales__na	s__Clostridiales bacterium VE202-27
2.4336	-0.0376597	0.0303588	-1.24049	0.214796	0.518342	k__Bacteria	p__Firmicutes	c__Bacilli	o__Lactobacillales	f__Streptococcaceae	g__Streptococcus	s__Streptococcus sp. HMSC068F04
15.6551	0.00765992	0.00617963	1.23954	0.215144	0.518701	k__Bacteria	p__Firmicutes	c__Clostridia	o__Clostridiales	f__Lachnospiraceae	g__Butyrivibrio	s__Butyrivibrio sp. AE2032
8937.83	-0.0256949	0.020804	-1.2351	0.216795	0.521964	k__Bacteria	p__Firmicutes	c__Bacilli	o__Lactobacillales	f__Streptococcaceae	g__Streptococcus	s__Streptococcus__uc
47.4691	-0.0193227	0.0156483	-1.23482	0.216899	0.521964	k__Bacteria	p__Bacteroidetes	c__Bacteroidia	o__Bacteroidales	f__Porphyromonadaceae	g__Gabonia	s__Gabonia massiliensis
1.72298	-0.0460274	0.0373322	-1.23291	0.217608	0.523185	k__Bacteria	p__Proteobacteria	c__Gammaproteobacteria	o__Enterobacterales	f__Enterobacteriaceae	g__Pluralibacter	s__Pluralibacter gergoviae
5.54727	-0.0195614	0.0158974	-1.23047	0.21852	0.524693	k__Bacteria	p__Firmicutes	c__Negativicutes	o__Veillonellales	f__Veillonellaceae	g__Dialister	s__Dialister micraerophilus
10.4991	-0.0112386	0.00913592	-1.23016	0.218639	0.524693	k__Bacteria	p__Firmicutes	c__Clostridia	o__Clostridiales	f__Lachnospiraceae	g__Oribacterium	s__Oribacterium sp. KHPX15
52.7189	-0.00586313	0.00477033	-1.22908	0.219041	0.525173	k__Bacteria	p__Firmicutes	c__Clostridia	o__Clostridiales	f__Lachnospiraceae	g__Lachnoclostridium	s__[Clostridium] aminophilum
210.078	-0.0107846	0.00879872	-1.2257	0.220313	0.527735	k__Bacteria	p__Firmicutes	c__Clostridia	o__Clostridiales	f__Lachnospiraceae	g__Lachnoclostridium	s__[Clostridium] symbiosum
235.284	-0.0241212	0.0197132	-1.2236	0.221101	0.529039	k__Bacteria	p__Proteobacteria	c__Deltaproteobacteria	o__Desulfovibrionales	f__Desulfovibrionaceae	g__Mailhella	s__Mailhella massiliensis
3.26224	0.0142009	0.0116099	1.22317	0.221264	0.529039	k__Bacteria	p__Firmicutes	c__Clostridia	o__Clostridiales	f__Lachnospiraceae	g__Pseudobutyrivibrio	s__Pseudobutyrivibrio sp. JW11
2.92331	0.0146534	0.0119969	1.22143	0.221922	0.530125	k__Bacteria	p__Firmicutes	c__Negativicutes	o__Selenomonadales	f__Sporomusaceae	g__Sporomusa	s__Sporomusa malonica
111.803	-0.0132512	0.0108712	-1.21894	0.222868	0.531587	k__Bacteria	p__Actinobacteria	c__Coriobacteriia	o__Coriobacteriales	f__Coriobacteriaceae	g__Coriobacteriaceae__na	s__Coriobacteriaceae bacterium CHKCI002
20.0836	0.0266233	0.021845	1.21874	0.222943	0.531587	k__Bacteria	p__Firmicutes	c__Erysipelotrichia	o__Erysipelotrichales	f__Erysipelotrichaceae	g__Erysipelatoclostridium	s__Erysipelatoclostridium ramosum
4.68932	0.0118662	0.00975762	1.21609	0.223949	0.533496	k__Bacteria	p__Firmicutes	c__Clostridia	o__Clostridiales	f__Peptococcaceae	g__Desulfosporosinus	s__Desulfosporosinus acididurans
30.6394	-0.0278466	0.0229389	-1.21394	0.224769	0.534958	k__Bacteria	p__Actinobacteria	c__Actinobacteria	o__Actinomycetales	f__Actinomycetaceae	g__Actinomyces	s__Actinomyces sp. Marseille-P2825
589.245	-0.0184215	0.015189	-1.21281	0.225201	0.535497	k__Bacteria	p__Bacteroidetes	c__Bacteroidia	o__Bacteroidales	f__Bacteroidaceae	g__Bacteroides	s__Bacteroides sp. D20
18.649	0.0199307	0.0164429	1.21211	0.225469	0.535643	k__Bacteria	p__Actinobacteria	c__Actinobacteria	o__Bifidobacteriales	f__Bifidobacteriaceae	g__Bifidobacterium	s__Bifidobacterium pullorum
17.8261	0.00914462	0.00755124	1.21101	0.225892	0.536159	k__Bacteria	p__Firmicutes	c__Firmicutes__na	o__Firmicutes__na	f__Firmicutes__na	g__Ndongobacter	s__Ndongobacter massiliensis
34.2195	0.00860366	0.00711263	1.20963	0.22642	0.536696	k__Bacteria	p__Firmicutes	c__Clostridia	o__Clostridiales	f__Ruminococcaceae	g__Ruminococcaceae__na	s__Ruminococcaceae bacterium CPB6
2.12916	-0.058107	0.0480484	-1.20934	0.226532	0.536696	k__Bacteria	p__Bacteria__na	c__Bacteria__na	o__Bacteria__na	f__Bacteria__na	g__Bacteria__na	s__uncultured bacterium Contigcl_1748
0.419707	-0.0628115	0.0519612	-1.20882	0.226733		k__Bacteria	p__Bacteroidetes	c__Flavobacteriia	o__Flavobacteriales	f__Flavobacteriaceae	g__Riemerella	s__Riemerella__uc
30.2579	0.0803435	0.0664711	1.2087	0.226779	0.536793	k__Bacteria	p__Firmicutes	c__Clostridia	o__Clostridiales	f__Clostridiaceae	g__Clostridium	s__Clostridium sp. 28_12
71.5237	-0.0144594	0.0119734	-1.20763	0.227191	0.53728	k__Bacteria	p__Bacteroidetes	c__Bacteroidia	o__Bacteroidales	f__Bacteroidaceae	g__Bacteroides	s__Bacteroides reticulotermitis
2.63134	0.0148079	0.0122745	1.20639	0.227667	0.537915	k__Bacteria	p__Firmicutes	c__Clostridia	o__Clostridiales	f__Clostridiales__na	g__Epulopiscium	s__Epulopiscium sp. Nuni2H_MBin003
82.9068	0.0330939	0.0274723	1.20463	0.228348	0.539034	k__Bacteria	p__Firmicutes	c__Negativicutes	o__Veillonellales	f__Veillonellaceae	g__Veillonella	s__Veillonella sp. oral taxon 158
4.81611	-0.0118681	0.00987599	-1.20171	0.229474	0.541201	k__Bacteria	p__Firmicutes	c__Clostridia	o__Clostridiales	f__Clostridiaceae	g__Clostridium	s__Clostridium carboxidivorans
5.02363	-0.02128	0.0177208	-1.20085	0.229811	0.541503	k__Bacteria	p__Firmicutes	c__Erysipelotrichia	o__Erysipelotrichales	f__Erysipelotrichaceae	g__Erysipelothrix	s__Erysipelothrix rhusiopathiae
1.47558	0.0458213	0.0381881	1.19988	0.230184	0.541609	k__Bacteria	p__Proteobacteria	c__Gammaproteobacteria	o__Pasteurellales	f__Pasteurellaceae	g__Haemophilus	s__Haemophilus sp. HMSC073C03
0.623134	0.0332667	0.0277267	1.19981	0.230213		k__Bacteria	p__Bacteria__na	c__Bacteria__na	o__Bacteria__na	f__Bacteria__na	g__Bacteria__na	s__Candidatus Melainabacteria bacterium GWF2_37_15
56.4087	0.00701084	0.00584578	1.1993	0.230412	0.541609	k__Bacteria	p__Firmicutes	c__Clostridia	o__Clostridiales	f__Lachnospiraceae	g__Pseudobutyrivibrio	s__Pseudobutyrivibrio__uc
10.103	-0.0149882	0.0124993	-1.19912	0.230481	0.541609	k__Bacteria	p__Proteobacteria	c__Betaproteobacteria	o__Betaproteobacteria__uc	f__Betaproteobacteria__uc	g__Betaproteobacteria__uc	s__Betaproteobacteria__uc
6.60812	-0.0315008	0.0263218	-1.19676	0.231402	0.543204	k__Bacteria	p__Bacteroidetes	c__Bacteroidia	o__Bacteroidales	f__Prevotellaceae	g__Prevotella	s__Prevotella sp. lc2012
90.68	0.0286767	0.0239756	1.19608	0.231667	0.543204	k__Bacteria	p__Firmicutes	c__Clostridia	o__Clostridiales	f__Clostridiaceae	g__Clostridium	s__Clostridium sp. 29_15
19.1938	-0.0151069	0.0126336	-1.19577	0.231786	0.543204	k__Bacteria	p__Bacteroidetes	c__Bacteroidia	o__Bacteroidales	f__Rikenellaceae	g__Millionella	s__Millionella massiliensis
0.64211	-0.0474063	0.0396911	-1.19438	0.232329		k__Bacteria	p__Proteobacteria	c__Epsilonproteobacteria	o__Campylobacterales	f__Campylobacteraceae	g__Campylobacter	s__Campylobacter upsaliensis
322.246	-0.0162431	0.0136004	-1.19432	0.232354	0.544044	k__Bacteria	p__Actinobacteria	c__Coriobacteriia	o__Coriobacteriales	f__Coriobacteriaceae	g__Coriobacteriaceae__uc	s__Coriobacteriaceae__uc
5.85216	-0.0223962	0.0187832	-1.19235	0.233122	0.545306	k__Bacteria	p__Bacteroidetes	c__Bacteroidia	o__Bacteroidales	f__Porphyromonadaceae	g__Porphyromonas	s__Porphyromonas sp. COT-239 OH1446
14.4854	0.0191555	0.0160719	1.19187	0.233313	0.545306	k__Bacteria	p__Actinobacteria	c__Actinobacteria	o__Corynebacteriales	f__Corynebacteriaceae	g__Corynebacterium	s__Corynebacterium durum
2.16287	0.0190096	0.0159607	1.19102	0.233645	0.545593	k__Bacteria	p__Actinobacteria	c__Actinobacteria	o__Corynebacteriales	f__Mycobacteriaceae	g__Mycobacterium	s__Mycobacterium__uc
1.1902	0.0252612	0.0212378	1.18944	0.234265	0.546097	k__Bacteria	p__Tenericutes	c__Mollicutes	o__Acholeplasmatales	f__Acholeplasmataceae	g__Acholeplasma	s__Acholeplasma hippikon
2.87448	-0.0181625	0.0152728	-1.1892	0.23436	0.546097	k__Bacteria	p__Firmicutes	c__Clostridia	o__Clostridiales	f__Lachnospiraceae	g__Butyrivibrio	s__Butyrivibrio sp. WCD2001
195.761	0.00897146	0.00754622	1.18887	0.234492	0.546097	k__Bacteria	p__Firmicutes	c__Clostridia	o__Clostridiales	f__Clostridiales__na	g__Pseudoflavonifractor	s__Pseudoflavonifractor sp. Marseille-P3106
1.50919	-0.0315978	0.0266193	-1.18703	0.235217	0.547296	k__Bacteria	p__Bacteroidetes	c__Chitinophagia	o__Chitinophagales	f__Chitinophagaceae	g__Chitinophaga	s__Chitinophaga terrae Kim and Jung 2007
1.70333	-0.0213166	0.0179896	-1.18494	0.236041	0.548722	k__Bacteria	p__Actinobacteria	c__Actinobacteria	o__Bifidobacteriales	f__Bifidobacteriaceae	g__Bifidobacterium	s__Bifidobacterium choerinum
0.521056	-0.0719025	0.0607544	-1.1835	0.236613		k__Bacteria	p__Bacteroidetes	c__Flavobacteriia	o__Flavobacteriales	f__Flavobacteriaceae	g__Chryseobacterium	s__Chryseobacterium tenax
70.6756	-0.00636248	0.00537896	-1.18285	0.23687	0.5499	k__Bacteria	p__Firmicutes	c__Bacilli	o__Bacillales	f__Staphylococcaceae	g__Staphylococcus	s__Staphylococcus aureus
13.6253	-0.00830323	0.00702121	-1.18259	0.236971	0.5499	k__Bacteria	p__Firmicutes	c__Clostridia	o__Clostridiales	f__Lachnospiraceae	g__Butyrivibrio	s__Butyrivibrio sp. YAB3001
84.5179	0.0148392	0.0125564	1.18181	0.237283	0.549942	k__Bacteria	p__Firmicutes	c__Clostridia	o__Clostridiales	f__Lachnospiraceae	g__Blautia	s__Blautia hydrogenotrophica
4739.42	-0.0140918	0.011934	-1.18081	0.237676	0.549942	k__Bacteria	p__Bacteroidetes	c__Bacteroidia	o__Bacteroidales	f__Odoribacteraceae	g__Odoribacter	s__Odoribacter__uc
25009.8	-0.0317921	0.026933	-1.18041	0.237836	0.549942	k__Bacteria	p__Bacteroidetes	c__Bacteroidia	o__Bacteroidales	f__Prevotellaceae	g__Prevotella	s__Prevotella copri
2.0384	0.0158661	0.0134461	1.17998	0.238007	0.549942	k__Bacteria	p__Firmicutes	c__Clostridia	o__Clostridiales	f__Clostridiaceae	g__Natronincola	s__Natronincola ferrireducens
205.834	0.0233804	0.0198159	1.17988	0.238047	0.549942	k__Bacteria	p__Firmicutes	c__Erysipelotrichia	o__Erysipelotrichales	f__Erysipelotrichaceae	g__Erysipelatoclostridium	s__[Clostridium] spiroforme
185.872	0.0214383	0.0181896	1.1786	0.238558	0.550633	k__Bacteria	p__Firmicutes	c__Clostridia	o__Clostridiales	f__Peptostreptococcaceae	g__Romboutsia	s__Romboutsia ilealis
5.80272	0.0126406	0.0107304	1.17802	0.238788	0.550674	k__Bacteria	p__Firmicutes	c__Clostridia	o__Clostridiales	f__Lachnospiraceae	g__Butyrivibrio	s__Butyrivibrio sp. XPD2006
10123	-0.0113895	0.00967737	-1.17692	0.239227	0.551197	k__Bacteria	p__Firmicutes	c__Clostridia	o__Clostridiales	f__Lachnospiraceae	g__Blautia	s__Blautia__uc
28.2743	-0.00845247	0.00718851	-1.17583	0.239663	0.55142	k__Bacteria	p__Firmicutes	c__Tissierellia	o__Tissierellales	f__Peptoniphilaceae	g__Finegoldia	s__Finegoldia magna
1.81643	-0.0353206	0.0300443	-1.17562	0.239748	0.55142	k__Bacteria	p__Bacteria__na	c__Bacteria__na	o__Bacteria__na	f__Bacteria__na	g__Bacteria__na	s__uncultured bacterium BAC10G6
653.113	0.0146194	0.0124777	1.17164	0.24134	0.554592	k__Bacteria	p__Firmicutes	c__Clostridia	o__Clostridiales	f__Lachnospiraceae	g__Blautia	s__Blautia sp. CAG:37
3.01319	0.0122058	0.010425	1.17082	0.241671	0.554862	k__Bacteria	p__Firmicutes	c__Clostridia	o__Clostridiales	f__Clostridiaceae	g__Clostridium	s__Clostridium akagii
3.06159	-0.0259887	0.0222184	-1.16969	0.242125	0.555412	k__Bacteria	p__Proteobacteria	c__Gammaproteobacteria	o__Aeromonadales	f__Succinivibrionaceae	g__Anaerobiospirillum	s__Anaerobiospirillum succiniciproducens
377.022	0.00978049	0.00838543	1.16637	0.243466	0.557997	k__Bacteria	p__Firmicutes	c__Clostridia	o__Clostridiales	f__Clostridiales__na	g__Clostridiales__na	s__Clostridiales bacterium Nov_37_41
100.612	0.00543266	0.00466022	1.16575	0.243715	0.558074	k__Bacteria	p__Firmicutes	c__Clostridia	o__Clostridiales	f__Ruminococcaceae	g__Anaerotruncus	s__Anaerotruncus sp. G3(2012)
5.00833	0.0125891	0.0108215	1.16334	0.244692	0.559818	k__Bacteria	p__Firmicutes	c__Clostridia	o__Clostridiales	f__Clostridiaceae	g__Clostridium	s__Clostridium collagenovorans
9.33591	0.0199335	0.0171562	1.16188	0.245283	0.560483	k__Bacteria	p__Actinobacteria	c__Actinobacteria	o__Bifidobacteriales	f__Bifidobacteriaceae	g__Bifidobacterium	s__Bifidobacterium saguini
5.89406	0.0164636	0.0141737	1.16156	0.245413	0.560483	k__Bacteria	p__Firmicutes	c__Clostridia	o__Clostridiales	f__Lachnospiraceae	g__Lachnospiraceae__na	s__Lachnospiraceae bacterium MD2004
1.94223	-0.0388684	0.0335702	-1.15782	0.246936	0.563465	k__Bacteria	p__Bacteroidetes	c__Flavobacteriia	o__Flavobacteriales	f__Flavobacteriaceae	g__Salegentibacter	s__Salegentibacter__uc
4.86512	-0.0140895	0.0121849	-1.15631	0.247554	0.56438	k__Bacteria	p__Bacteroidetes	c__Bacteroidia	o__Bacteroidales	f__Porphyromonadaceae	g__Paludibacter	s__Paludibacter propionicigenes
130.805	-0.0201547	0.0174534	-1.15477	0.248183	0.565318	k__Bacteria	p__Bacteroidetes	c__Bacteroidia	o__Bacteroidales	f__Bacteroidaceae	g__Bacteroides	s__Bacteroides intestinalis CAG:315
0.665142	-0.0387993	0.0336499	-1.15303	0.248899		k__Bacteria	p__Firmicutes	c__Bacilli	o__Lactobacillales	f__Streptococcaceae	g__Streptococcus	s__Streptococcus urinalis
6.63743	-0.0152636	0.0132728	-1.15	0.250145	0.569289	k__Bacteria	p__Actinobacteria	c__Coriobacteriia	o__Eggerthellales	f__Eggerthellaceae	g__Slackia	s__Slackia sp. CM382
0.87786	0.080435	0.0700822	1.14772	0.251082	0.570581	k__Bacteria	p__Spirochaetes	c__Spirochaetia	o__Brachyspirales	f__Brachyspiraceae	g__Brachyspira	s__Brachyspira murdochii
1.87168	0.0394893	0.0344418	1.14655	0.251566	0.570581	k__Bacteria	p__Firmicutes	c__Clostridia	o__Clostridiales	f__Peptococcaceae	g__Dehalobacter	s__Dehalobacter sp. DCA
7.67279	-0.0135946	0.011859	-1.14635	0.251648	0.570581	k__Bacteria	p__Bacteroidetes	c__Bacteroidia	o__Bacteroidales	f__Prevotellaceae	g__Prevotella	s__Prevotella sp. 10(H)
1.94634	-0.0187945	0.0164016	-1.1459	0.251838	0.570581	k__Bacteria	p__Firmicutes	c__Negativicutes	o__Selenomonadales	f__Selenomonadaceae	g__Selenomonas	s__Selenomonas sp. oral taxon 138
4.03557	0.0117793	0.010283	1.14552	0.251994	0.570581	k__Bacteria	p__Firmicutes	c__Clostridia	o__Clostridiales	f__Eubacteriaceae	g__Alkalibacter	s__Alkalibacter saccharofermentans
210.644	-0.0168992	0.0147535	-1.14543	0.25203	0.570581	k__Bacteria	p__Bacteroidetes	c__Bacteroidia	o__Bacteroidales	f__Porphyromonadaceae	g__Tannerella	s__Tannerella sp. 6_1_58FAA_CT1
165.071	-0.00586281	0.00512452	-1.14407	0.252594	0.57103	k__Bacteria	p__Firmicutes	c__Clostridia	o__Clostridiales	f__Lachnospiraceae	g__Lachnospiraceae__na	s__Lachnospiraceae bacterium A4
233.23	0.0986342	0.0862322	1.14382	0.252698	0.57103	k__Bacteria	p__Firmicutes	c__Clostridia	o__Clostridiales	f__Clostridiaceae	g__Clostridium	s__Clostridium sp. CAG:273
5.11377	0.0175591	0.0153584	1.14329	0.252919	0.57103	k__Bacteria	p__Firmicutes	c__Erysipelotrichia	o__Erysipelotrichales	f__Erysipelotrichaceae	g__Candidatus Stoquefichus	s__Candidatus Stoquefichus__uc
2663.83	-0.0187483	0.0164051	-1.14283	0.253108	0.57103	k__Bacteria	p__Proteobacteria	c__Deltaproteobacteria	o__Desulfovibrionales	f__Desulfovibrionaceae	g__Bilophila	s__Bilophila__uc
91.3953	-0.00678063	0.0059512	-1.13937	0.254548	0.573292	k__Bacteria	p__Firmicutes	c__Clostridia	o__Clostridiales	f__Clostridiaceae	g__Clostridium	s__Clostridium sp. ASF502
11506.7	0.00943735	0.00828856	1.1386	0.25487	0.573292	k__Bacteria	p__Firmicutes	c__Clostridia	o__Clostridiales	f__Ruminococcaceae	g__Ruminococcaceae__uc	s__Ruminococcaceae__uc
4.44921	-0.0265389	0.0233106	-1.13849	0.254915	0.573292	k__Bacteria	p__Bacteroidetes	c__Bacteroidia	o__Bacteroidales	f__Prevotellaceae	g__Prevotella	s__Prevotella loescheii
1.48956	0.0196046	0.0172226	1.13831	0.254992	0.573292	k__Bacteria	p__Firmicutes	c__Bacilli	o__Lactobacillales	f__Lactobacillaceae	g__Lactobacillus	s__Lactobacillus concavus
2.57611	0.0255279	0.0224609	1.13655	0.255727	0.574446	k__Bacteria	p__Bacteroidetes	c__Bacteroidia	o__Bacteroidales	f__Porphyromonadaceae	g__Fermentimonas	s__Fermentimonas caenicola
3.29356	-0.013762	0.012117	-1.13576	0.256057	0.57469	k__Bacteria	p__Firmicutes	c__Clostridia	o__Clostridiales	f__Clostridiaceae	g__Clostridium	s__Clostridium sp. LF2
32.8703	-0.0225036	0.0198272	-1.13499	0.256381	0.574921	k__Bacteria	p__Bacteroidetes	c__Bacteroidia	o__Bacteroidales	f__Prevotellaceae	g__Prevotella	s__Prevotella sp. C561
1.57784	-0.0433137	0.0382286	-1.13302	0.257207	0.576276	k__Bacteria	p__Proteobacteria	c__Gammaproteobacteria	o__Enterobacterales	f__Enterobacteriaceae	g__Salmonella	s__Salmonella__uc
2.03213	-0.0216953	0.0192217	-1.12868	0.259031	0.57935	k__Bacteria	p__Bacteroidetes	c__Bacteroidia	o__Bacteroidales	f__Porphyromonadaceae	g__Paludibacter	s__Paludibacter__uc
0.985003	0.0691679	0.0613471	1.12748	0.259538	0.57935	k__Bacteria	p__Spirochaetes	c__Spirochaetia	o__Brachyspirales	f__Brachyspiraceae	g__Brachyspira	s__Brachyspira innocens
99.3281	-0.0341245	0.0302719	-1.12727	0.259629	0.57935	k__Bacteria	p__Proteobacteria	c__Betaproteobacteria	o__Burkholderiales	f__Sutterellaceae	g__Sutterella	s__Sutterella wadsworthensis CAG:135
3.18163	0.0314447	0.0278966	1.12719	0.259664	0.57935	k__Bacteria	p__Proteobacteria	c__Gammaproteobacteria	o__Pasteurellales	f__Pasteurellaceae	g__Haemophilus	s__Haemophilus haemolyticus
2.29575	0.0358593	0.0318151	1.12712	0.259693	0.57935	k__Bacteria	p__Firmicutes	c__Bacilli	o__Lactobacillales	f__Streptococcaceae	g__Streptococcus	s__Streptococcus sp. HPH0090
3.37401	0.0152562	0.0135428	1.12652	0.259946	0.579416	k__Bacteria	p__Firmicutes	c__Bacilli	o__Lactobacillales	f__Aerococcaceae	g__Facklamia	s__Facklamia__uc
1.25276	-0.0246086	0.0218725	-1.12509	0.260551	0.579996	k__Bacteria	p__Firmicutes	c__Clostridia	o__Clostridiales	f__Clostridiaceae	g__Clostridium	s__Clostridium thermobutyricum
2090.32	0.025421	0.0226236	1.12365	0.261161	0.579996	k__Bacteria	p__Bacteroidetes	c__Bacteroidia	o__Bacteroidales	f__Bacteroidaceae	g__Bacteroides	s__Bacteroides sp. CAG:144
236.719	-0.00994603	0.00885395	-1.12334	0.261292	0.579996	k__Bacteria	p__Firmicutes	c__Clostridia	o__Clostridiales	f__Clostridiaceae	g__Massilioclostridium	s__Massilioclostridium coli
37.4029	-0.0200554	0.0178593	-1.12297	0.261451	0.579996	k__Bacteria	p__Firmicutes	c__Bacilli	o__Lactobacillales	f__Streptococcaceae	g__Streptococcus	s__Streptococcus mitis
54.1535	0.024936	0.0222201	1.12222	0.261767	0.579996	k__Bacteria	p__Proteobacteria	c__Gammaproteobacteria	o__Pasteurellales	f__Pasteurellaceae	g__Pasteurellaceae__uc	s__Pasteurellaceae__uc
1726.24	0.0208865	0.0186184	1.12182	0.261939	0.579996	k__Bacteria	p__Firmicutes	c__Clostridia	o__Clostridiales	f__Peptostreptococcaceae	g__Romboutsia	s__Romboutsia timonensis
7.11448	0.0106554	0.00950617	1.12089	0.262336	0.579996	k__Bacteria	p__Firmicutes	c__Clostridia	o__Clostridiales	f__Clostridiaceae	g__Clostridium	s__Clostridium sp. MSTE9
1.24049	0.0278948	0.0248936	1.12056	0.262476	0.579996	k__Bacteria	p__Firmicutes	c__Clostridia	o__Clostridiales	f__Peptococcaceae	g__Dehalobacter	s__Dehalobacter restrictus
149.131	0.00926144	0.00827068	1.11979	0.262802	0.579996	k__Bacteria	p__Firmicutes	c__Clostridia	o__Clostridiales	f__Clostridiales__na	g__Intestinimonas	s__Intestinimonas massiliensis
20.7273	-0.0154573	0.0138059	-1.11962	0.262875	0.579996	k__Bacteria	p__Firmicutes	c__Clostridia	o__Clostridiales	f__Clostridiaceae	g__Clostridium	s__Clostridium sp. HGF2
3.59507	-0.0540711	0.0482986	-1.11952	0.262919	0.579996	k__Bacteria	p__Proteobacteria	c__Gammaproteobacteria	o__Enterobacterales	f__Enterobacteriaceae	g__Enterobacter	s__Enterobacter asburiae
6.46689	-0.0181266	0.0161954	-1.11924	0.263038	0.579996	k__Bacteria	p__Firmicutes	c__Clostridia	o__Clostridiales	f__Clostridiaceae	g__Clostridium	s__Clostridium chauvoei
101.463	0.00711922	0.00636169	1.11908	0.263107	0.579996	k__Bacteria	p__Firmicutes	c__Clostridia	o__Clostridiales	f__Eubacteriaceae	g__Eubacterium	s__Eubacterium sp. ER2
682.062	-0.0296574	0.0265289	-1.11793	0.263598	0.580585	k__Bacteria	p__Firmicutes	c__Clostridia	o__Clostridiales	f__Lachnospiraceae	g__Butyrivibrio	s__Butyrivibrio crossotus CAG:259
20.481	-0.0158101	0.0141542	-1.11699	0.263996	0.580629	k__Bacteria	p__Firmicutes	c__Negativicutes	o__Acidaminococcales	f__Acidaminococcaceae	g__Acidaminococcus	s__Acidaminococcus massiliensis
13.1863	-0.0144722	0.0129582	-1.11684	0.264064	0.580629	k__Bacteria	p__Firmicutes	c__Clostridia	o__Clostridiales	f__Clostridiaceae	g__Clostridium	s__Clostridium baratii
22.7722	-0.013084	0.0117435	-1.11415	0.265215	0.582223	k__Bacteria	p__Firmicutes	c__Firmicutes__na	o__Firmicutes__na	f__Firmicutes__na	g__Firmicutes__na	s__Firmicutes bacterium M10-2
0.792621	0.0535575	0.0480725	1.1141	0.265237	0.582223	k__Bacteria	p__Bacteroidetes	c__Flavobacteriia	o__Flavobacteriales	f__Flavobacteriaceae	g__Flavobacterium	s__[Flexibacter] sp. ATCC 35103
68.7467	0.0131173	0.0117869	1.11287	0.265766	0.582763	k__Bacteria	p__Firmicutes	c__Clostridia	o__Clostridiales	f__Clostridiaceae	g__Clostridium	s__Clostridium sp. CAG:411
7.76324	-0.0374751	0.0336985	-1.11207	0.266109	0.582763	k__Bacteria	p__Proteobacteria	c__Gammaproteobacteria	o__Enterobacterales	f__Enterobacteriaceae	g__Escherichia	s__Escherichia albertii
18.4313	-0.0210127	0.0188971	-1.11196	0.266156	0.582763	k__Bacteria	p__Bacteroidetes	c__Bacteroidia	o__Bacteroidales	f__Bacteroidaceae	g__Bacteroides	s__Bacteroides fragilis CAG:558
20.8253	0.0148484	0.0133748	1.11018	0.266922	0.583654	k__Bacteria	p__Firmicutes	c__Firmicutes__na	o__Firmicutes__na	f__Firmicutes__na	g__Firmicutes__na	s__Firmicutes bacterium CAG:466
2.09001	0.01855	0.0167165	1.10968	0.267136	0.583654	k__Bacteria	p__Firmicutes	c__Clostridia	o__Clostridiales	f__Peptostreptococcaceae	g__Tepidibacter	s__Tepidibacter thalassicus
7.23679	0.0125186	0.0112855	1.10927	0.267314	0.583654	k__Bacteria	p__Spirochaetes	c__Spirochaetia	o__Spirochaetales	f__Spirochaetaceae	g__Treponema	s__Treponema succinifaciens
16.1987	0.00888868	0.00801557	1.10893	0.267461	0.583654	k__Bacteria	p__Firmicutes	c__Clostridia	o__Clostridiales	f__Lachnospiraceae	g__Lachnoanaerobaculum	s__Lachnoanaerobaculum__uc
4.64602	0.0114964	0.0103746	1.10813	0.267805	0.583733	k__Bacteria	p__Spirochaetes	c__Spirochaetia	o__Spirochaetales	f__Spirochaetaceae	g__Sphaerochaeta	s__Sphaerochaeta globosa
1.3456	-0.0250666	0.0226273	-1.1078	0.267947	0.583733	k__Bacteria	p__Actinobacteria	c__Actinobacteria	o__Actinomycetales	f__Actinomycetaceae	g__Actinomyces	s__Actinomyces viscosus
4.62652	0.0117988	0.0106621	1.10661	0.268462	0.584365	k__Bacteria	p__Firmicutes	c__Clostridia	o__Clostridiales	f__Clostridiaceae	g__Desnuesiella	s__Desnuesiella massiliensis
53.4009	0.00431381	0.0039046	1.1048	0.269245	0.584828	k__Bacteria	p__Firmicutes	c__Clostridia	o__Clostridiales	f__Heliobacteriaceae	g__Heliobacterium	s__Heliobacterium modesticaldum
3.50673	-0.0144784	0.0131099	-1.10439	0.269425	0.584828	k__Bacteria	p__Firmicutes	c__Bacilli	o__Bacillales	f__Bacillaceae	g__Bacillus	s__Bacillus thermoamylovorans
33.4621	0.00588507	0.00534324	1.1014	0.270721	0.584828	k__Bacteria	p__Firmicutes	c__Clostridia	o__Clostridiales	f__Lachnospiraceae	g__Lachnoclostridium	s__[Clostridium] polysaccharolyticum
1.60491	0.0202946	0.0184325	1.10103	0.270885	0.584828	k__Bacteria	p__Firmicutes	c__Bacilli	o__Lactobacillales	f__Lactobacillaceae	g__Lactobacillus	s__Lactobacillus agilis
91.5037	-0.00539852	0.00490451	-1.10073	0.271016	0.584828	k__Bacteria	p__Firmicutes	c__Clostridia	o__Clostridiales	f__Lachnospiraceae	g__Lachnospiraceae__na	s__Lachnospiraceae bacterium A2
3541.03	-0.00716243	0.0065106	-1.10012	0.271281	0.584828	k__Bacteria	p__Bacteria__na	c__Bacteria__na	o__Bacteria__na	f__Bacteria__na	g__Bacteria__na	s__uncultured bacterium
11.5943	0.0216002	0.0196353	1.10007	0.271303	0.584828	k__Bacteria	p__Firmicutes	c__Clostridia	o__Clostridia__na	f__Clostridia__na	g__Clostridia__na	s__Clostridia bacterium UC5.1-2H6
0.846685	0.0337163	0.0306496	1.10006	0.271307	0.584828	k__Bacteria	p__Synergistetes	c__Synergistia	o__Synergistales	f__Synergistaceae	g__Aminomonas	s__Aminomonas paucivorans
99.1472	-0.00622296	0.00565768	-1.09991	0.271369	0.584828	k__Bacteria	p__Firmicutes	c__Clostridia	o__Clostridiales	f__Lachnospiraceae	g__Lachnospiraceae__na	s__Lachnospiraceae bacterium 3-1
10.2204	-0.0165506	0.0150484	-1.09983	0.271407	0.584828	k__Bacteria	p__Actinobacteria	c__Coriobacteriia	o__Coriobacteriales	f__Coriobacteriaceae	g__Coriobacteriaceae__na	s__Coriobacteriaceae bacterium BV3Ac1
577.641	0.0144155	0.013108	1.09975	0.27144	0.584828	k__Bacteria	p__Firmicutes	c__Clostridia	o__Clostridiales	f__Oscillospiraceae	g__Oscillibacter	s__Oscillibacter sp. CAG:155
121.418	0.00888366	0.00808253	1.09912	0.271716	0.584828	k__Bacteria	p__Firmicutes	c__Clostridia	o__Clostridiales	f__Clostridiales__na	g__Flavonifractor	s__Flavonifractor__uc
8786.79	0.0222391	0.0202465	1.09841	0.272024	0.584828	k__Bacteria	p__Firmicutes	c__Firmicutes__na	o__Firmicutes__na	f__Firmicutes__na	g__Firmicutes__na	s__Firmicutes bacterium CAG:103
20.4165	0.0346418	0.0315393	1.09837	0.272043	0.584828	k__Bacteria	p__Actinobacteria	c__Actinobacteria	o__Propionibacteriales	f__Propionibacteriaceae	g__Propionibacterium	s__Propionibacterium freudenreichii
303.434	0.0264519	0.0240832	1.09835	0.27205	0.584828	k__Bacteria	p__Firmicutes	c__Negativicutes	o__Acidaminococcales	f__Acidaminococcaceae	g__Acidaminococcus	s__Acidaminococcus fermentans
4.9823	-0.0186407	0.0169906	-1.09711	0.272592	0.585097	k__Bacteria	p__Proteobacteria	c__Gammaproteobacteria	o__Pseudomonadales	f__Moraxellaceae	g__Acinetobacter	s__Acinetobacter baumannii
2.69247	-0.0278126	0.0253525	-1.09704	0.272625	0.585097	k__Bacteria	p__Fibrobacteres	c__Fibrobacteria	o__Fibrobacterales	f__Fibrobacteraceae	g__Fibrobacter	s__Fibrobacter sp. UWH6
0.693016	-0.0589907	0.0538034	-1.09641	0.272898		k__Bacteria	p__Bacteroidetes	c__Sphingobacteriia	o__Sphingobacteriia__uc	f__Sphingobacteriia__uc	g__Sphingobacteriia__uc	s__Sphingobacteriia__uc
26.37	-0.0247528	0.0226026	-1.09513	0.273461	0.586098	k__Bacteria	p__Bacteroidetes	c__Bacteroidia	o__Bacteroidales	f__Prevotellaceae	g__Prevotella	s__Prevotella scopos
3.80038	0.012153	0.0110992	1.09494	0.273542	0.586098	k__Bacteria	p__Firmicutes	c__Clostridia	o__Clostridiales	f__Clostridiaceae	g__Caminicella	s__Caminicella sporogenes
3.21643	-0.013845	0.0126746	-1.09234	0.274683	0.587262	k__Bacteria	p__Firmicutes	c__Bacilli	o__Lactobacillales	f__Aerococcaceae	g__Aerococcus	s__Aerococcus christensenii
76.3605	-0.0160289	0.014679	-1.09196	0.27485	0.587262	k__Bacteria	p__Firmicutes	c__Clostridia	o__Clostridiales	f__Lachnospiraceae	g__Lachnospiraceae__na	s__Lachnospiraceae bacterium 9_1_43BFAA
5.10404	0.00940396	0.00861376	1.09174	0.274949	0.587262	k__Bacteria	p__Firmicutes	c__Clostridia	o__Clostridiales	f__Peptococcaceae	g__Syntrophobotulus	s__Syntrophobotulus glycolicus
10.5213	0.00758711	0.00695708	1.09056	0.275467	0.587262	k__Bacteria	p__Firmicutes	c__Clostridia	o__Clostridiales	f__Lachnospiraceae	g__Lachnospiraceae__na	s__Lachnospiraceae bacterium AC2028
0.905013	-0.0855678	0.0784659	-1.09051	0.275489	0.587262	k__Bacteria	p__Proteobacteria	c__Gammaproteobacteria	o__Enterobacterales	f__Enterobacteriaceae	g__Klebsiella	s__Klebsiella sp. AS10
4.35487	0.0220403	0.020215	1.09029	0.275584	0.587262	k__Bacteria	p__Firmicutes	c__Negativicutes	o__Veillonellales	f__Veillonellaceae	g__Veillonella	s__Veillonella sp. DORA_B_18_19_23
4.05565	0.0176733	0.0162125	1.0901	0.275667	0.587262	k__Bacteria	p__Firmicutes	c__Clostridia	o__Clostridiales	f__Peptostreptococcaceae	g__Paraclostridium	s__Paraclostridium benzoelyticum
6.28967	-0.00970336	0.00892695	-1.08697	0.277049	0.589721	k__Bacteria	p__Firmicutes	c__Clostridia	o__Clostridiales	f__Clostridiaceae	g__Clostridium	s__Clostridium sp. ASBs410
31.3189	0.024448	0.0225805	1.08271	0.278939	0.593259	k__Bacteria	p__Firmicutes	c__Firmicutes__na	o__Firmicutes__na	f__Firmicutes__na	g__Firmicutes__na	s__Firmicutes bacterium CAG:272_52_7
5.80767	0.0118222	0.0109314	1.08148	0.279482	0.593285	k__Bacteria	p__Firmicutes	c__Clostridia	o__Clostridiales	f__Lachnospiraceae	g__Butyrivibrio	s__Butyrivibrio sp. LB2008
3.43192	-0.0167092	0.0154628	-1.08061	0.279872	0.593285	k__Bacteria	p__Bacteroidetes	c__Bacteroidia	o__Marinilabiliales	f__Prolixibacteraceae	g__Sunxiuqinia	s__Sunxiuqinia dokdonensis
2.06961	0.0287942	0.0266477	1.08055	0.279897	0.593285	k__Bacteria	p__Proteobacteria	c__Gammaproteobacteria	o__Xanthomonadales	f__Xanthomonadaceae	g__Xanthomonas	s__Xanthomonas citri
29.8602	0.0548602	0.0507874	1.08019	0.280056	0.593285	k__Bacteria	p__Firmicutes	c__Clostridia	o__Clostridiales	f__Clostridiaceae	g__Clostridium	s__Clostridium sp. CAG:793
1.18767	-0.0519707	0.0481161	-1.08011	0.280093	0.593285	k__Bacteria	p__Firmicutes	c__Bacilli	o__Lactobacillales	f__Lactobacillaceae	g__Lactobacillus	s__Lactobacillus diolivorans
706.996	0.00905673	0.0084008	1.07808	0.280999	0.59452	k__Bacteria	p__Firmicutes	c__Clostridia	o__Clostridiales	f__Clostridiales__na	g__Intestinimonas	s__Intestinimonas butyriciproducens
372.063	-0.0141194	0.0131005	-1.07778	0.281133	0.59452	k__Bacteria	p__Firmicutes	c__Clostridia	o__Clostridiales	f__Ruminococcaceae	g__Ruminococcus	s__Ruminococcus sp. CAG:9
416.376	-0.031368	0.0291197	-1.07721	0.281387	0.594573	k__Bacteria	p__Proteobacteria	c__Betaproteobacteria	o__Burkholderiales	f__Sutterellaceae	g__Sutterella	s__Sutterella sp. CAG:521
67.1935	-0.00580871	0.00539751	-1.07618	0.281845	0.595	k__Bacteria	p__Firmicutes	c__Clostridia	o__Clostridiales	f__Clostridiaceae	g__Clostridium	s__Clostridium sp. C105KSO13
2.23522	0.0213978	0.0198914	1.07573	0.282047	0.595	k__Bacteria	p__Firmicutes	c__Negativicutes	o__Selenomonadales	f__Selenomonadaceae	g__Selenomonas	s__Selenomonas flueggei
42.5589	0.0138473	0.0128798	1.07512	0.282322	0.595098	k__Bacteria	p__Firmicutes	c__Negativicutes	o__Acidaminococcales	f__Acidaminococcaceae	g__Succiniclasticum	s__Succiniclasticum ruminis
257.016	-0.00643562	0.00599378	-1.07372	0.28295	0.595937	k__Bacteria	p__Firmicutes	c__Clostridia	o__Clostridiales	f__Clostridiaceae	g__Clostridium	s__Clostridium sp. ATCC BAA-442
14.8366	-0.0119327	0.0111206	-1.07303	0.283259	0.596106	k__Bacteria	p__Firmicutes	c__Clostridia	o__Clostridiales	f__Lachnospiraceae	g__Pseudobutyrivibrio	s__Pseudobutyrivibrio sp. MD2005
4.28547	0.0125985	0.0117536	1.07188	0.283772	0.596701	k__Bacteria	p__Firmicutes	c__Clostridia	o__Clostridiales	f__Clostridiales__na	g__Clostridiales__na	s__Clostridiales bacterium oral taxon 876
2.49143	-0.0539133	0.0503399	-1.07099	0.284175	0.597067	k__Bacteria	p__Bacteria__na	c__Bacteria__na	o__Bacteria__na	f__Bacteria__na	g__Bacteria__na	s__uncultured bacterium fosmid pJB135F11
23.8559	0.0156477	0.0146246	1.06995	0.28464	0.597103	k__Bacteria	p__Firmicutes	c__Bacilli	o__Lactobacillales	f__Lactobacillaceae	g__Lactobacillus	s__Lactobacillus rhamnosus
1.32826	0.0183863	0.0171847	1.06993	0.284652	0.597103	k__Bacteria	p__Firmicutes	c__Clostridia	o__Clostridiales	f__Symbiobacteriaceae	g__Symbiobacterium	s__Symbiobacterium thermophilum
398.676	0.00827797	0.00774091	1.06938	0.284899	0.597139	k__Bacteria	p__Firmicutes	c__Clostridia	o__Clostridiales	f__Ruminococcaceae	g__Fournierella	s__Fournierella massiliensis
1.79514	0.0168603	0.0158182	1.06588	0.286479	0.599583	k__Bacteria	p__Firmicutes	c__Clostridia	o__Clostridiales	f__Peptostreptococcaceae	g__Peptostreptococcaceae__na	s__[Clostridium] thermoalcaliphilum
14.7174	0.00988324	0.00927331	1.06577	0.286526	0.599583	k__Bacteria	p__Firmicutes	c__Clostridia	o__Clostridiales	f__Lachnospiraceae	g__Niameybacter	s__Niameybacter massiliensis
6.38113	0.0193385	0.0181772	1.06389	0.287378	0.599861	k__Bacteria	p__Bacteria__na	c__Bacteria__na	o__Bacteria__na	f__Bacteria__na	g__Bacteria__na	s__bacterium F082
166.532	-0.0169177	0.0159026	-1.06383	0.287407	0.599861	k__Bacteria	p__Bacteroidetes	c__Bacteroidia	o__Bacteroidales	f__Bacteroidaceae	g__Bacteroides	s__Bacteroides sp. 3_1_23
528.286	0.0079318	0.0074612	1.06307	0.287749	0.599861	k__Bacteria	p__Firmicutes	c__Clostridia	o__Clostridiales	f__Ruminococcaceae	g__Angelakisella	s__Angelakisella massiliensis
144.456	-0.0176481	0.0166092	-1.06256	0.287984	0.599861	k__Bacteria	p__Bacteroidetes	c__Bacteroidia	o__Bacteroidales	f__Bacteroidaceae	g__Bacteroides	s__Bacteroides sp. CAG:754
1.10586	-0.109364	0.102934	-1.06247	0.288023	0.599861	k__Bacteria	p__Proteobacteria	c__Gammaproteobacteria	o__Enterobacterales	f__Enterobacteriaceae	g__Klebsiella	s__Klebsiella sp. OBRC7
1.56447	-0.0303385	0.028556	-1.06242	0.288044	0.599861	k__Bacteria	p__Bacteroidetes	c__Flavobacteriia	o__Flavobacteriales	f__Flavobacteriaceae	g__Elizabethkingia	s__Elizabethkingia meningoseptica
104.72	-0.0120846	0.0113841	-1.06153	0.288449	0.600223	k__Bacteria	p__Bacteroidetes	c__Bacteroidia	o__Bacteroidales	f__Porphyromonadaceae	g__Parabacteroides	s__Parabacteroides chinchillae
33.8791	-0.0136776	0.0128948	-1.06071	0.288821	0.600294	k__Bacteria	p__Bacteroidetes	c__Bacteroidia	o__Bacteroidales	f__Porphyromonadaceae	g__Parabacteroides	s__Parabacteroides sp. HGS0025
6.83198	0.0128168	0.0120864	1.06044	0.288945	0.600294	k__Bacteria	p__Proteobacteria	c__Deltaproteobacteria	o__Deltaproteobacteria__uc	f__Deltaproteobacteria__uc	g__Deltaproteobacteria__uc	s__Deltaproteobacteria__uc
163.792	-0.0257949	0.024429	-1.05591	0.29101	0.604067	k__Bacteria	p__Proteobacteria	c__Betaproteobacteria	o__Burkholderiales	f__Burkholderiales__na	g__Burkholderiales__na	s__Burkholderiales bacterium YL45
491.825	-0.0237194	0.0224736	-1.05544	0.291226	0.604067	k__Bacteria	p__Actinobacteria	c__Coriobacteriia	o__Eggerthellales	f__Eggerthellaceae	g__Eggerthella	s__Eggerthella sp. CAG:209
6.40552	-0.0135291	0.0128412	-1.05357	0.29208	0.605355	k__Bacteria	p__Bacteroidetes	c__Flavobacteriia	o__Flavobacteriales	f__Flavobacteriaceae	g__Chryseobacterium	s__Chryseobacterium__uc
188.345	-0.0184911	0.0175929	-1.05105	0.293234	0.606261	k__Bacteria	p__Bacteroidetes	c__Bacteroidia	o__Bacteroidales	f__Prevotellaceae	g__Prevotella	s__Prevotella sp. CAG:1320
178.689	-0.0113975	0.0108495	-1.05051	0.293484	0.606261	k__Bacteria	p__Firmicutes	c__Clostridia	o__Clostridiales	f__Clostridiaceae	g__Clostridium	s__Clostridium sp. BR31
2.40659	-0.0173106	0.0164837	-1.05016	0.293644	0.606261	k__Bacteria	p__Actinobacteria	c__Actinobacteria	o__Bifidobacteriales	f__Bifidobacteriaceae	g__Bifidobacterium	s__Bifidobacterium asteroides
326.326	-0.0143253	0.0136426	-1.05004	0.293701	0.606261	k__Bacteria	p__Bacteroidetes	c__Bacteroidia	o__Bacteroidales	f__Bacteroidaceae	g__Bacteroides	s__Bacteroides salanitronis
8.9836	0.0083016	0.00790814	1.04975	0.293832	0.606261	k__Bacteria	p__Firmicutes	c__Clostridia	o__Clostridiales	f__Clostridiaceae	g__Proteiniclasticum	s__Proteiniclasticum ruminis
8.08557	0.00827839	0.00789194	1.04897	0.294193	0.606261	k__Bacteria	p__Firmicutes	c__Clostridia	o__Clostridiales	f__Clostridiaceae	g__Clostridium	s__Clostridium polynesiense
31.628	0.00700682	0.00668439	1.04824	0.294529	0.606261	k__Bacteria	p__Firmicutes	c__Clostridia	o__Clostridiales	f__Lachnospiraceae	g__Anaerocolumna	s__Anaerocolumna aminovalerica
29.5157	-0.0139	0.0132681	-1.04763	0.294811	0.606261	k__Bacteria	p__Firmicutes	c__Clostridia	o__Clostridiales	f__Lachnospiraceae	g__Lachnospiraceae__na	s__Lachnospiraceae bacterium 8_1_57FAA
17.9255	0.00666826	0.00636732	1.04726	0.294978	0.606261	k__Bacteria	p__Firmicutes	c__Clostridia	o__Clostridiales	f__Lachnospiraceae	g__Lachnospiraceae__na	s__Lachnospiraceae bacterium NK4A179
2.97012	-0.0190102	0.0181616	-1.04673	0.295226	0.606261	k__Bacteria	p__Fibrobacteres	c__Fibrobacteria	o__Fibrobacterales	f__Fibrobacteraceae	g__Fibrobacter	s__Fibrobacter sp. UWB7
13.2071	0.00946759	0.00904662	1.04653	0.295315	0.606261	k__Bacteria	p__Firmicutes	c__Tissierellia	o__Tissierellia__na	f__Tissierellia__na	g__Sedimentibacter	s__Sedimentibacter sp. B4
7.01609	0.0192285	0.0183816	1.04608	0.295525	0.606261	k__Bacteria	p__Actinobacteria	c__Coriobacteriia	o__Coriobacteriales	f__Atopobiaceae	g__Olsenella	s__Olsenella sp. kh2p3
1.45983	-0.0349443	0.0334068	-1.04603	0.295549	0.606261	k__Bacteria	p__Proteobacteria	c__Gammaproteobacteria	o__Enterobacterales	f__Yersiniaceae	g__Yersinia	s__Yersinia pestis
1.43363	-0.0243324	0.0232813	-1.04515	0.295955	0.606615	k__Bacteria	p__Bacteroidetes	c__Chitinophagia	o__Chitinophagales	f__Chitinophagaceae	g__Chitinophaga	s__Chitinophaga rupis
6.7914	0.0194465	0.0186264	1.04403	0.296471	0.60704	k__Bacteria	p__Actinobacteria	c__Actinobacteria	o__Bifidobacteriales	f__Bifidobacteriaceae	g__Bifidobacterium	s__Bifidobacterium minimum
12.5875	0.00701741	0.00672367	1.04369	0.29663	0.60704	k__Bacteria	p__Firmicutes	c__Clostridia	o__Clostridiales	f__Clostridiales__na	g__Epulopiscium	s__Epulopiscium__uc
67.837	0.00871057	0.00835933	1.04202	0.297403	0.608144	k__Bacteria	p__Proteobacteria	c__Epsilonproteobacteria	o__Campylobacterales	f__Campylobacteraceae	g__Campylobacter	s__Campylobacter coli
3.84499	-0.0262923	0.0253038	-1.03907	0.298774	0.610466	k__Bacteria	p__Firmicutes	c__Negativicutes	o__Veillonellales	f__Veillonellaceae	g__Negativicoccus	s__Negativicoccus succinicivorans
4.7074	0.0116652	0.0112376	1.03805	0.299247	0.610952	k__Bacteria	p__Firmicutes	c__Clostridia	o__Clostridiales	f__Clostridiaceae	g__Clostridium	s__Clostridium amylolyticum
6.91398	0.0134162	0.0129314	1.0375	0.299504	0.610999	k__Bacteria	p__Firmicutes	c__Clostridia	o__Clostridiales	f__Peptostreptococcaceae	g__Clostridioides	s__Clostridioides mangenotii
3.02985	-0.0131499	0.0126881	-1.0364	0.300016	0.611561	k__Bacteria	p__Firmicutes	c__Clostridia	o__Clostridiales	f__Clostridiaceae	g__Clostridium	s__Clostridium hydrogeniformans
1.958	-0.0156803	0.0151418	-1.03556	0.300405	0.611876	k__Bacteria	p__Firmicutes	c__Clostridia	o__Clostridiales	f__Lachnospiraceae	g__Pseudobutyrivibrio	s__Pseudobutyrivibrio sp. C4
5047.98	0.0105628	0.0102065	1.0349	0.300714	0.612025	k__Bacteria	p__Firmicutes	c__Clostridia	o__Clostridiales	f__Lachnospiraceae	g__Fusicatenibacter	s__Fusicatenibacter saccharivorans
4.10625	-0.0176558	0.0171051	-1.0322	0.30198	0.613475	k__Bacteria	p__Firmicutes	c__Bacilli	o__Bacillales	f__Bacillaceae	g__Bacillus	s__Bacillus toyonensis
3.9655	0.0116643	0.0113025	1.03201	0.302068	0.613475	k__Bacteria	p__Spirochaetes	c__Spirochaetia	o__Spirochaetales	f__Spirochaetaceae	g__Treponema	s__Treponema phagedenis
0.539406	-0.0583379	0.0565507	-1.0316	0.302258		k__Bacteria	p__Proteobacteria	c__Gammaproteobacteria	o__Pseudomonadales	f__Moraxellaceae	g__Acinetobacter	s__Acinetobacter johnsonii
4599.86	0.0117881	0.0114278	1.03153	0.302294	0.613475	k__Bacteria	p__Firmicutes	c__Clostridia	o__Clostridiales	f__Ruminococcaceae	g__Gemmiger	s__Gemmiger formicilis
5913.38	-0.0124593	0.0120817	-1.03125	0.302422	0.613475	k__Bacteria	p__Bacteroidetes	c__Bacteroidia	o__Bacteroidales	f__Bacteroidaceae	g__Bacteroides	s__Bacteroides uniformis
10.0587	-0.0076071	0.00737938	-1.03086	0.302607	0.613475	k__Bacteria	p__Spirochaetes	c__Spirochaetia	o__Spirochaetales	f__Spirochaetaceae	g__Treponema	s__Treponema socranskii
16.0061	0.0079541	0.0077254	1.0296	0.303196	0.61419	k__Bacteria	p__Firmicutes	c__Clostridia	o__Clostridiales	f__Lachnospiraceae	g__Cellulosilyticum	s__Cellulosilyticum lentocellum
6.24659	-0.00965176	0.00938556	-1.02836	0.30378	0.614349	k__Bacteria	p__Firmicutes	c__Clostridia	o__Clostridiales	f__Lachnospiraceae	g__Lachnoclostridium	s__[Clostridium] indolis
2.89448	0.0127092	0.0123695	1.02746	0.304203	0.614349	k__Bacteria	p__Firmicutes	c__Clostridia	o__Clostridiales	f__Ruminococcaceae	g__Ruminococcaceae__na	s__Ruminococcaceae bacterium AE2021
1.0211	-0.0317005	0.030871	-1.02687	0.304483	0.614349	k__Bacteria	p__Firmicutes	c__Bacilli	o__Lactobacillales	f__Leuconostocaceae	g__Leuconostocaceae__uc	s__Leuconostocaceae__uc
628.752	0.112198	0.109265	1.02685	0.304493	0.614349	k__Bacteria	p__Firmicutes	c__Clostridia	o__Clostridiales	f__Clostridiaceae	g__Clostridium	s__Clostridium sp. CAG:798
27.1474	-0.0115247	0.0112234	-1.02685	0.304493	0.614349	k__Bacteria	p__Firmicutes	c__Clostridia	o__Clostridiales	f__Ruminococcaceae	g__Ethanoligenens	s__Ethanoligenens harbinense
8.71927	0.0241898	0.0235671	1.02642	0.304693	0.614349	k__Bacteria	p__Firmicutes	c__Clostridia	o__Clostridiales	f__Clostridiales__na	g__Clostridiales__na	s__Clostridiales bacterium VE202-18
200.68	0.0103674	0.0101087	1.02559	0.305085	0.614518	k__Bacteria	p__Firmicutes	c__Clostridia	o__Clostridiales	f__Ruminococcaceae	g__Ruminococcaceae__na	s__Ruminococcaceae bacterium D5
706.732	-0.0194629	0.0189837	-1.02524	0.305249	0.614518	k__Bacteria	p__Firmicutes	c__Firmicutes__na	o__Firmicutes__na	f__Firmicutes__na	g__Firmicutes__na	s__Firmicutes bacterium CAG:56
0.896929	-0.0758632	0.0741357	-1.0233	0.306165	0.615885	k__Bacteria	p__Firmicutes	c__Bacilli	o__Lactobacillales	f__Lactobacillaceae	g__Lactobacillus	s__Lactobacillus otakiensis
5.7727	0.00979142	0.00957394	1.02272	0.306442	0.615965	k__Bacteria	p__Spirochaetes	c__Spirochaetia	o__Spirochaetales	f__Spirochaetaceae	g__Treponema	s__Treponema berlinense
167.898	-0.00735244	0.00719266	-1.02222	0.306679	0.615965	k__Bacteria	p__Firmicutes	c__Clostridia	o__Clostridiales	f__Lachnospiraceae	g__Hespellia	s__Hespellia stercorisuis
50.1269	0.0155365	0.0152424	1.0193	0.308061	0.618263	k__Bacteria	p__Firmicutes	c__Clostridia	o__Clostridiales	f__Peptostreptococcaceae	g__Paeniclostridium	s__Paeniclostridium sordellii
5.59167	-0.01703	0.0167262	-1.01816	0.3086	0.61865	k__Bacteria	p__Firmicutes	c__Clostridia	o__Clostridiales	f__Clostridiaceae	g__Clostridium	s__Clostridium septicum
47.36	-0.0301421	0.0296248	-1.01746	0.308933	0.61865	k__Bacteria	p__Actinobacteria	c__Actinobacteria	o__Bifidobacteriales	f__Bifidobacteriaceae	g__Bifidobacterium	s__Bifidobacterium bifidum CAG:234
13.6869	0.00668817	0.00657386	1.01739	0.308968	0.61865	k__Bacteria	p__Firmicutes	c__Clostridia	o__Clostridiales	f__Lachnospiraceae	g__Lachnospiraceae__na	s__Lachnospiraceae bacterium P6A3
2.26309	0.0128897	0.0127016	1.01481	0.310195	0.620629	k__Bacteria	p__Firmicutes	c__Clostridia	o__Clostridiales	f__Clostridiaceae	g__Natronincola	s__Natronincola peptidivorans
577.764	0.0172832	0.0170451	1.01397	0.310599	0.620959	k__Bacteria	p__Firmicutes	c__Clostridia	o__Clostridiales	f__Eubacteriaceae	g__Eubacterium	s__Eubacterium sp. CAG:161
17.6209	-0.00910718	0.0089952	-1.01245	0.311323	0.621929	k__Bacteria	p__Firmicutes	c__Clostridia	o__Clostridiales	f__Lachnospiraceae	g__Oribacterium	s__Oribacterium sp. WCC10
2.57801	0.015669	0.0154995	1.01094	0.312047	0.622895	k__Bacteria	p__Firmicutes	c__Negativicutes	o__Selenomonadales	f__Selenomonadaceae	g__Selenomonas	s__Selenomonas sp. oral taxon 126
5.43257	0.0109196	0.010818	1.00939	0.312786	0.623891	k__Bacteria	p__Firmicutes	c__Clostridia	o__Clostridiales	f__Lachnospiraceae	g__Oribacterium	s__Oribacterium sp. oral taxon 108
4.1093	-0.0123503	0.0122516	-1.00805	0.313429	0.624194	k__Bacteria	p__Firmicutes	c__Clostridia	o__Clostridiales	f__Clostridiaceae	g__Clostridium	s__Clostridium chromiireducens
7.30775	-0.0138683	0.0137593	-1.00792	0.313494	0.624194	k__Bacteria	p__Bacteroidetes	c__Bacteroidia	o__Bacteroidales	f__Porphyromonadaceae	g__Parabacteroides	s__Parabacteroides chartae
2.7131	-0.0156894	0.0155779	-1.00715	0.313861	0.624194	k__Bacteria	p__Actinobacteria	c__Actinobacteria	o__Actinomycetales	f__Actinomycetaceae	g__Mobiluncus	s__Mobiluncus curtisii
4.57077	0.0256003	0.0254209	1.00705	0.313909	0.624194	k__Bacteria	p__Lentisphaerae	c__Lentisphaerae__na	o__Lentisphaerae__na	f__Lentisphaerae__na	g__Lentisphaerae__na	s__Lentisphaerae bacterium GWF2_50_93
1.46515	0.0190439	0.0189249	1.00629	0.314275	0.624194	k__Bacteria	p__Firmicutes	c__Bacilli	o__Bacillales	f__Paenibacillaceae	g__Paenibacillus	s__Paenibacillus dendritiformis
2.54367	0.0176845	0.0175801	1.00594	0.314445	0.624194	k__Bacteria	p__Firmicutes	c__Clostridia	o__Clostridiales	f__Lachnospiraceae	g__Lachnospiraceae__na	s__Lachnospiraceae bacterium FD2005
2.39461	-0.0350843	0.0348897	-1.00558	0.314619	0.624194	k__Bacteria	p__Bacteria__na	c__Bacteria__na	o__Bacteria__na	f__Bacteria__na	g__Bacteria__na	s__uncultured bacterium 37b14
8680.28	-0.0268678	0.0268264	-1.00154	0.316566	0.627268	k__Bacteria	p__Firmicutes	c__Erysipelotrichia	o__Erysipelotrichales	f__Erysipelotrichaceae	g__Holdemanella	s__Holdemanella biformis
4.99754	0.0102244	0.0102188	1.00054	0.317047	0.627268	k__Bacteria	p__Firmicutes	c__Clostridia	o__Clostridiales	f__Clostridiaceae	g__Caloramator	s__Caloramator quimbayensis
1.8571	0.0212545	0.0212444	1.00048	0.31708	0.627268	k__Bacteria	p__Fibrobacteres	c__Fibrobacteria	o__Fibrobacterales	f__Fibrobacteraceae	g__Fibrobacter	s__Fibrobacter sp. UWH9
7.45795	0.0168984	0.0168922	1.00037	0.317134	0.627268	k__Bacteria	p__Actinobacteria	c__Actinobacteria	o__Bifidobacteriales	f__Bifidobacteriaceae	g__Bifidobacterium	s__Bifidobacterium tsurumiense
6.98829	-0.00933125	0.00934721	-0.998293	0.318137	0.627422	k__Bacteria	p__Firmicutes	c__Clostridia	o__Clostridiales	f__Clostridiaceae	g__Clostridium	s__Clostridium puniceum
32.674	0.00909063	0.00910827	0.998063	0.318249	0.627422	k__Bacteria	p__Firmicutes	c__Erysipelotrichia	o__Erysipelotrichales	f__Erysipelotrichaceae	g__Candidatus Stoquefichus	s__Candidatus Stoquefichus sp. KLE1796
4.64647	-0.0133236	0.0133517	-0.99789	0.318333	0.627422	k__Bacteria	p__Bacteroidetes	c__Flavobacteriia	o__Flavobacteriales	f__Flavobacteriaceae	g__Flavobacterium	s__Flavobacterium__uc
41.0585	-0.0181766	0.0182176	-0.99775	0.318401	0.627422	k__Bacteria	p__Firmicutes	c__Clostridia	o__Clostridiales	f__Clostridiaceae	g__Clostridium	s__Clostridium sp. CAG:242
140.701	-0.0184359	0.0184782	-0.997713	0.318418	0.627422	k__Bacteria	p__Firmicutes	c__Clostridia	o__Clostridiales	f__Eubacteriaceae	g__Eubacterium	s__Eubacterium sp. CAG76_36_125
38.121	0.00772606	0.00775952	0.995689	0.319401	0.628765	k__Bacteria	p__Firmicutes	c__Clostridia	o__Clostridiales	f__Lachnospiraceae	g__Lachnospiraceae__na	s__Lachnospiraceae bacterium XBD2001
2.67395	-0.0219383	0.0220422	-0.995286	0.319597	0.628765	k__Bacteria	p__Firmicutes	c__Bacilli	o__Lactobacillales	f__Carnobacteriaceae	g__Granulicatella	s__Granulicatella adiacens
2.14047	-0.0203095	0.0204154	-0.994816	0.319826	0.628765	k__Bacteria	p__Firmicutes	c__Negativicutes	o__Veillonellales	f__Veillonellaceae	g__Megasphaera	s__Megasphaera sp. UPII 199-6
0.938554	0.0446252	0.044924	0.99335	0.320539	0.629236	k__Bacteria	p__Candidatus Tectomicrobia	c__Candidatus Tectomicrobia__na	o__Candidatus Tectomicrobia__na	f__Candidatus Tectomicrobia__na	g__Candidatus Entotheonella	s__Candidatus Entotheonella sp. TSY1
3.91328	0.0135947	0.013686	0.993329	0.32055	0.629236	k__Bacteria	p__Firmicutes	c__Negativicutes	o__Selenomonadales	f__Sporomusaceae	g__Sporomusa	s__Sporomusa sphaeroides
7.84023	-0.00790217	0.00796973	-0.991523	0.32143	0.630179	k__Bacteria	p__Firmicutes	c__Clostridia	o__Clostridiales	f__Lachnospiraceae	g__Lachnoclostridium	s__[Clostridium] sphenoides
20.6432	-0.00967658	0.00976586	-0.990859	0.321755	0.630179	k__Bacteria	p__Firmicutes	c__Clostridia	o__Clostridiales	f__Lachnospiraceae	g__Anaerostipes	s__Anaerostipes sp. 3_2_56FAA
4.40995	-0.0193576	0.0195363	-0.990853	0.321757	0.630179	k__Bacteria	p__Bacteria__na	c__Bacteria__na	o__Bacteria__na	f__Bacteria__na	g__Bacteria__na	s__uncultured pig faeces bacterium
1.08288	-0.044456	0.0449518	-0.988971	0.322677	0.631266	k__Bacteria	p__Firmicutes	c__Bacilli	o__Lactobacillales	f__Enterococcaceae	g__Enterococcus	s__Enterococcus avium
1.94734	-0.0307956	0.0311468	-0.988724	0.322798	0.631266	k__Bacteria	p__Bacteroidetes	c__Sphingobacteriia	o__Sphingobacteriales	f__Sphingobacteriaceae	g__Sphingobacterium	s__Sphingobacterium sp. Ag1
58.9363	0.0220051	0.0222866	0.987369	0.323462	0.632067	k__Bacteria	p__Bacteroidetes	c__Bacteroidia	o__Bacteroidales	f__Prevotellaceae	g__Alloprevotella	s__Alloprevotella rava
3.19301	-0.0140075	0.0141935	-0.986895	0.323694	0.632067	k__Bacteria	p__Firmicutes	c__Negativicutes	o__Selenomonadales	f__Sporomusaceae	g__Pelosinus	s__Pelosinus__uc
6.87695	0.0076203	0.00773232	0.985512	0.324373	0.632541	k__Bacteria	p__Firmicutes	c__Clostridia	o__Clostridiales	f__Clostridiaceae	g__Clostridium	s__Clostridium magnum
120.069	0.0161965	0.0164427	0.985029	0.32461	0.632541	k__Bacteria	p__Bacteroidetes	c__Bacteroidia	o__Bacteroidales	f__Porphyromonadaceae	g__Parabacteroides	s__Parabacteroides sp. YL27
2.16495	0.018265	0.0185469	0.984803	0.324721	0.632541	k__Bacteria	p__Bacteria__na	c__Bacteria__na	o__Bacteria__na	f__Bacteria__na	g__Bacteria__na	s__uncultured bacterium Contig1777_n_1791_cl
10.6771	0.00816424	0.00829348	0.984417	0.324911	0.632541	k__Bacteria	p__Firmicutes	c__Clostridia	o__Clostridiales	f__Lachnospiraceae	g__Butyrivibrio	s__Butyrivibrio sp. AC2005
206.089	0.0154391	0.0156925	0.983848	0.32519	0.632574	k__Bacteria	p__Firmicutes	c__Clostridia	o__Clostridiales	f__Eubacteriaceae	g__Eubacterium	s__Eubacterium sp. 45_250
5.09613	0.00960256	0.00976473	0.983393	0.325414	0.632574	k__Bacteria	p__Firmicutes	c__Negativicutes	o__Selenomonadales	f__Sporomusaceae	g__Sporomusa	s__Sporomusa acidovorans
32.6124	-0.0101087	0.0102935	-0.982052	0.326074	0.632874	k__Bacteria	p__Actinobacteria	c__Coriobacteriia	o__Eggerthellales	f__Eggerthellaceae	g__Phoenicibacter	s__Phoenicibacter massiliensis
27.5916	0.00977929	0.00996231	0.981629	0.326283	0.632874	k__Bacteria	p__Firmicutes	c__Clostridia	o__Clostridiales	f__Ruminococcaceae	g__Subdoligranulum	s__Subdoligranulum__uc
64.9923	-0.0225493	0.0229721	-0.981596	0.326299	0.632874	k__Bacteria	p__Bacteroidetes	c__Bacteroidia	o__Bacteroidales	f__Prevotellaceae	g__Prevotella	s__Prevotella dentalis
4.13054	0.0152519	0.0155932	0.978116	0.328017	0.635731	k__Bacteria	p__Actinobacteria	c__Actinobacteria	o__Bifidobacteriales	f__Bifidobacteriaceae	g__Bifidobacterium	s__Bifidobacterium mongoliense
2.51705	-0.0267771	0.0273931	-0.977514	0.328315	0.635835	k__Bacteria	p__Synergistetes	c__Synergistia	o__Synergistales	f__Synergistaceae	g__Jonquetella	s__Jonquetella anthropi
8.47346	-0.00941973	0.00964918	-0.976221	0.328955	0.6366	k__Bacteria	p__Actinobacteria	c__Coriobacteriia	o__Coriobacteriales	f__Coriobacteriales__na	g__Coriobacteriales__na	s__Coriobacteriales bacterium DNF00809
7.82698	-0.0174614	0.017899	-0.975552	0.329286	0.636767	k__Bacteria	p__Actinobacteria	c__Actinobacteria	o__Propionibacteriales	f__Propionibacteriaceae	g__Propionibacteriaceae__uc	s__Propionibacteriaceae__uc
18.4609	0.00696351	0.00715393	0.973383	0.330363	0.638089	k__Bacteria	p__Firmicutes	c__Clostridia	o__Clostridiales	f__Lachnospiraceae	g__Lachnospiraceae__na	s__Lachnospiraceae bacterium AB2028
9.59367	-0.0116913	0.0120134	-0.973186	0.330461	0.638089	k__Bacteria	p__Bacteroidetes	c__Bacteroidia	o__Bacteroidales	f__Bacteroidaceae	g__Bacteroides	s__Bacteroides propionicifaciens
1.04877	0.0535171	0.0551662	0.970106	0.331994	0.640317	k__Bacteria	p__Bacteria__na	c__Bacteria__na	o__Bacteria__na	f__Bacteria__na	g__Bacteria__na	s__uncultured bacterium BAC25G1
3.18386	0.0349213	0.0360305	0.969213	0.332439	0.640317	k__Bacteria	p__Firmicutes	c__Tissierellia	o__Tissierellales	f__Tissierellaceae	g__Urmitella	s__Urmitella timonensis
198.706	0.0198773	0.0205153	0.968904	0.332593	0.640317	k__Bacteria	p__Firmicutes	c__Clostridia	o__Clostridiales	f__Peptostreptococcaceae	g__Terrisporobacter	s__Terrisporobacter glycolicus
318.935	0.014693	0.0151648	0.968889	0.3326	0.640317	k__Bacteria	p__Bacteroidetes	c__Bacteroidia	o__Bacteroidales	f__Rikenellaceae	g__Alistipes	s__Alistipes sp. 56_sp_Nov_56_25
52.6664	-0.0151297	0.0156686	-0.965601	0.334244	0.642246	k__Bacteria	p__Firmicutes	c__Clostridia	o__Clostridiales	f__Catabacteriaceae	g__Catabacter	s__Catabacter hongkongensis
2.10745	-0.0200889	0.0208164	-0.965049	0.33452	0.642246	k__Bacteria	p__Bacteroidetes	c__Flavobacteriia	o__Flavobacteriales	f__Flavobacteriaceae	g__Capnocytophaga	s__Capnocytophaga sp. oral taxon 329
53.6914	-0.02096	0.0217226	-0.964894	0.334598	0.642246	k__Bacteria	p__Firmicutes	c__Clostridia	o__Clostridiales	f__Clostridiaceae	g__Clostridium	s__Clostridium bartlettii CAG:1329
6.51629	-0.015652	0.0162224	-0.964838	0.334626	0.642246	k__Bacteria	p__Firmicutes	c__Clostridia	o__Clostridia__na	f__Clostridia__na	g__Clostridia__na	s__Clostridia bacterium UC5.1-1C12
22.4364	0.00824288	0.00854702	0.964415	0.334838	0.642246	k__Bacteria	p__Actinobacteria	c__Actinobacteria	o__Bifidobacteriales	f__Bifidobacteriaceae	g__Bifidobacterium	s__Bifidobacterium saeculare
2.90213	-0.0153542	0.0159416	-0.963153	0.335471	0.64285	k__Bacteria	p__Actinobacteria	c__Coriobacteriia	o__Coriobacteriales	f__Atopobiaceae	g__Atopobium	s__Atopobium sp. ICM42b
0.851632	0.0218787	0.0227313	0.962493	0.335802	0.64285	k__Bacteria	p__Lentisphaerae	c__Lentisphaeria	o__Lentisphaerales	f__Lentisphaeraceae	g__Lentisphaera	s__Lentisphaera araneosa
4.67182	0.0162175	0.0168527	0.962308	0.335895	0.64285	k__Bacteria	p__Bacteria__na	c__Bacteria__na	o__Bacteria__na	f__Bacteria__na	g__Bacteria__na	s__uncultured bacterium Contigcl_1787
3.44434	-0.014874	0.015476	-0.961103	0.3365	0.643197	k__Bacteria	p__Firmicutes	c__Clostridia	o__Clostridiales	f__Clostridiaceae	g__Clostridium	s__Clostridium sp. Marseille-P2434
45.1567	0.00496673	0.00516849	0.960963	0.336571	0.643197	k__Bacteria	p__Firmicutes	c__Clostridia	o__Clostridiales	f__Lachnospiraceae	g__Anaerosporobacter	s__Anaerosporobacter mobilis
2.33825	0.0125796	0.0131024	0.960101	0.337004	0.643552	k__Bacteria	p__Firmicutes	c__Clostridia	o__Clostridiales	f__Clostridiaceae	g__Caloramator	s__Caloramator australicus
1418.84	-0.0163035	0.0170883	-0.954075	0.340046	0.648883	k__Bacteria	p__Proteobacteria	c__Deltaproteobacteria	o__Desulfovibrionales	f__Desulfovibrionaceae	g__Bilophila	s__Bilophila wadsworthia
10.9776	-0.00822743	0.00863388	-0.952923	0.340629	0.649519	k__Bacteria	p__Firmicutes	c__Clostridia	o__Clostridiales	f__Lachnospiraceae	g__Oribacterium	s__Oribacterium sp. P6A1
2753.63	0.0105961	0.0111437	0.950859	0.341676	0.650104	k__Bacteria	p__Firmicutes	c__Clostridia	o__Clostridiales	f__Lachnospiraceae	g__Coprococcus	s__Coprococcus catus
833.04	0.0109645	0.0115384	0.95026	0.34198	0.650104	k__Bacteria	p__Firmicutes	c__Clostridia	o__Clostridiales	f__Clostridiales__na	g__Clostridiales__na	s__Clostridiales bacterium 44_9
6.3814	0.0341677	0.0359576	0.950223	0.341999	0.650104	k__Bacteria	p__Firmicutes	c__Bacilli	o__Lactobacillales	f__Aerococcaceae	g__Facklamia	s__Facklamia hominis
38385.9	0.0146693	0.0154428	0.949913	0.342156	0.650104	k__Bacteria	p__Firmicutes	c__Clostridia	o__Clostridiales	f__Ruminococcaceae	g__Ruminococcus	s__Ruminococcus__uc
2.87212	-0.0175692	0.0184968	-0.949855	0.342186	0.650104	k__Bacteria	p__Actinobacteria	c__Coriobacteriia	o__Coriobacteriales	f__Atopobiaceae	g__Olsenella	s__Olsenella sp. SIT9
6.80913	-0.0281006	0.0296249	-0.948545	0.342852	0.650893	k__Bacteria	p__Firmicutes	c__Erysipelotrichia	o__Erysipelotrichales	f__Erysipelotrichaceae	g__Turicibacter	s__Turicibacter sp. HGF1
7.51142	0.0325645	0.0343864	0.947018	0.34363	0.651893	k__Bacteria	p__Lentisphaerae	c__Lentisphaerae__na	o__Lentisphaerae__na	f__Lentisphaerae__na	g__Lentisphaerae__na	s__Lentisphaerae bacterium GWF2_52_8
2.70625	0.012576	0.0132979	0.945711	0.344296	0.65268	k__Bacteria	p__Bacteria__na	c__Bacteria__na	o__Bacteria__na	f__Bacteria__na	g__Bacteria__na	s__uncultured bacterium 5G12
147.274	-0.0113084	0.0119823	-0.943765	0.34529	0.654087	k__Bacteria	p__Actinobacteria	c__Actinobacteria	o__Actinomycetales	f__Actinomycetaceae	g__Actinomyces	s__Actinomyces__uc
53.5994	0.00649782	0.00689196	0.942811	0.345777	0.654534	k__Bacteria	p__Firmicutes	c__Clostridia	o__Clostridiales	f__Lachnospiraceae	g__Blautia	s__Blautia sp. YL58
7.95984	-0.0121213	0.0128852	-0.940712	0.346853	0.656092	k__Bacteria	p__Bacteroidetes	c__Bacteroidia	o__Bacteroidales	f__Porphyromonadaceae	g__Dysgonomonas	s__Dysgonomonas sp. HGC4
188.598	-0.00847958	0.0090626	-0.935667	0.349445	0.660514	k__Bacteria	p__Firmicutes	c__Erysipelotrichia	o__Erysipelotrichales	f__Erysipelotrichaceae	g__Holdemania	s__Holdemania filiformis
3.68682	-0.010302	0.011022	-0.934669	0.349959	0.661005	k__Bacteria	p__Firmicutes	c__Tissierellia	o__Tissierellia__uc	f__Tissierellia__uc	g__Tissierellia__uc	s__Tissierellia__uc
2.38236	0.0153958	0.0164911	0.933582	0.35052	0.661583	k__Bacteria	p__Firmicutes	c__Clostridia	o__Clostridiales	f__Lachnospiraceae	g__Butyrivibrio	s__Butyrivibrio sp. FC2001
0.943354	0.0540049	0.0579526	0.931881	0.351398	0.66276	k__Bacteria	p__Lentisphaerae	c__Lentisphaeria	o__Victivallales	f__Victivallaceae	g__Victivallis	s__Victivallis vadensis
254.114	0.0156353	0.0167965	0.930867	0.351923	0.663268	k__Bacteria	p__Firmicutes	c__Clostridia	o__Clostridiales	f__Lachnospiraceae	g__Roseburia	s__Roseburia sp. CAG:10041_57
582.143	-0.0127587	0.0137418	-0.928453	0.353173	0.664683	k__Bacteria	p__Firmicutes	c__Clostridia	o__Clostridiales	f__Lachnospiraceae	g__Lachnospira	s__Lachnospira pectinoschiza
0.911661	-0.0230716	0.0248655	-0.927857	0.353482	0.664683	k__Bacteria	p__Firmicutes	c__Clostridia	o__Clostridiales	f__Clostridiales__na	g__Fenollaria	s__Fenollaria massiliensis
4.02634	0.010282	0.0110836	0.927676	0.353576	0.664683	k__Bacteria	p__Firmicutes	c__Clostridia	o__Clostridiales	f__Clostridiales__na	g__Proteiniborus	s__Proteiniborus ethanoligenes
7.78597	0.0155884	0.0168134	0.927145	0.353851	0.664683	k__Bacteria	p__Fibrobacteres	c__Fibrobacteria	o__Fibrobacterales	f__Fibrobacteraceae	g__Fibrobacter	s__Fibrobacter sp. UWOV1
1.97734	0.0196421	0.02119	0.926951	0.353952	0.664683	k__Bacteria	p__Elusimicrobia	c__Elusimicrobia	o__Elusimicrobiales	f__Elusimicrobiaceae	g__Elusimicrobium	s__Elusimicrobium minutum
25.3588	-0.0223667	0.0241623	-0.925688	0.354608	0.664811	k__Bacteria	p__Firmicutes	c__Clostridia	o__Clostridiales	f__Clostridiales__na	g__Clostridiales__na	s__Clostridiales bacterium VE202-29
1777.36	0.018913	0.0204373	0.925414	0.354751	0.664811	k__Bacteria	p__Firmicutes	c__Clostridia	o__Clostridiales	f__Oscillospiraceae	g__Oscillibacter	s__Oscillibacter sp. CAG:241_62_21
99.352	0.00520145	0.00562567	0.924592	0.355178	0.664811	k__Bacteria	p__Firmicutes	c__Clostridia	o__Clostridiales	f__Lachnospiraceae	g__Bariatricus	s__Bariatricus massiliensis
2.26515	0.0461003	0.0498677	0.924451	0.355252	0.664811	k__Bacteria	p__Firmicutes	c__Negativicutes	o__Veillonellales	f__Veillonellaceae	g__Megasphaera	s__Megasphaera sp. NM10
16.7393	-0.0219642	0.0237615	-0.92436	0.355299	0.664811	k__Bacteria	p__Bacteroidetes	c__Bacteroidia	o__Bacteroidales	f__Prevotellaceae	g__Prevotella	s__Prevotella sp. MSX73
1.59052	-0.0188516	0.020442	-0.922203	0.356423	0.666433	k__Bacteria	p__Spirochaetes	c__Spirochaetia	o__Spirochaetales	f__Spirochaetaceae	g__Treponema	s__Treponema medium
1.02124	-0.0424757	0.0461496	-0.920391	0.357368	0.667721	k__Bacteria	p__Proteobacteria	c__Gammaproteobacteria	o__Enterobacterales	f__Enterobacteriaceae	g__Kluyvera	s__Kluyvera intermedia
3.67857	0.010211	0.011107	0.919331	0.357922	0.667837	k__Bacteria	p__Actinobacteria	c__Actinobacteria	o__Actinomycetales	f__Actinomycetaceae	g__Varibaculum	s__Varibaculum timonense
5.06324	0.00824826	0.0089758	0.918944	0.358125	0.667837	k__Bacteria	p__Firmicutes	c__Clostridia	o__Clostridiales	f__Peptostreptococcaceae	g__Proteocatella	s__Proteocatella sphenisci
2.02102	-0.0177274	0.0192941	-0.918798	0.358201	0.667837	k__Bacteria	p__Fibrobacteres	c__Fibrobacteria	o__Fibrobacterales	f__Fibrobacteraceae	g__Fibrobacter	s__Fibrobacter sp. UWR3
107.322	-0.01494	0.0162962	-0.916775	0.359261	0.669332	k__Bacteria	p__Bacteroidetes	c__Bacteroidia	o__Bacteroidales	f__Bacteroidaceae	g__Bacteroides	s__Bacteroides sp. Marseille-P3132
93.1726	0.00872673	0.00952448	0.916242	0.35954	0.669373	k__Bacteria	p__Firmicutes	c__Clostridia	o__Clostridiales	f__Ruminococcaceae	g__Ruminococcaceae__na	s__Ruminococcaceae bacterium P7
4.26929	-0.00875833	0.00958329	-0.913917	0.36076	0.67031	k__Bacteria	p__Firmicutes	c__Clostridia	o__Clostridiales	f__Lachnospiraceae	g__Pseudobutyrivibrio	s__Pseudobutyrivibrio sp. 49
602.653	0.00825248	0.00903639	0.913249	0.361112	0.67031	k__Bacteria	p__Firmicutes	c__Clostridia	o__Clostridiales	f__Ruminococcaceae	g__Ruminococcaceae__na	s__Ruminococcaceae bacterium D16
4.17804	0.0100019	0.0109566	0.912871	0.36131	0.67031	k__Bacteria	p__Firmicutes	c__Negativicutes	o__Veillonellales	f__Veillonellaceae	g__Veillonellaceae__na	s__Veillonellaceae bacterium DNF00751
1.70422	0.0175676	0.0192462	0.912783	0.361357	0.67031	k__Bacteria	p__Bacteroidetes	c__Sphingobacteriia	o__Sphingobacteriales	f__Sphingobacteriaceae	g__Sphingobacterium	s__Sphingobacterium sp. JB170
225.5	-0.0125087	0.0137074	-0.912551	0.361479	0.67031	k__Bacteria	p__Firmicutes	c__Clostridia	o__Clostridiales	f__Clostridiaceae	g__Clostridium	s__Clostridium sp. CAG:964
5.22303	0.00987228	0.0108209	0.912338	0.361591	0.67031	k__Bacteria	p__Firmicutes	c__Tissierellia	o__Tissierellales	f__Tissierellales__na	g__Sporanaerobacter	s__Sporanaerobacter acetigenes
7.4229	-0.0112257	0.0123272	-0.910645	0.362483	0.671484	k__Bacteria	p__Firmicutes	c__Negativicutes	o__Selenomonadales	f__Selenomonadaceae	g__Centipeda	s__Centipeda periodontii
5.07024	-0.020197	0.0222263	-0.908702	0.363508	0.672903	k__Bacteria	p__Firmicutes	c__Bacilli	o__Bacillales	f__Bacillales__na	g__Gemella	s__Gemella morbillorum
0.592012	-0.0831323	0.0915979	-0.907579	0.364101		k__Bacteria	p__Bacteroidetes	c__Flavobacteriia	o__Flavobacteriales	f__Flavobacteriaceae	g__Polaribacter	s__Polaribacter sp. Hel1_85
8.49562	0.00972951	0.0107227	0.907371	0.364211	0.673725	k__Bacteria	p__Firmicutes	c__Clostridia	o__Clostridiales	f__Clostridiales__na	g__Clostridiales__na	s__Clostridiales bacterium KA00274
1.02729	-0.0305421	0.0336825	-0.906763	0.364532	0.67384	k__Bacteria	p__Bacteroidetes	c__Flavobacteriia	o__Flavobacteriales	f__Flavobacteriaceae	g__Capnocytophaga	s__Capnocytophaga sp. oral taxon 338
2.41873	0.0168393	0.0185948	0.905592	0.365152	0.674002	k__Bacteria	p__Actinobacteria	c__Actinobacteria	o__Streptomycetales	f__Streptomycetaceae	g__Streptomyces	s__Streptomyces filamentosus
4.7403	-0.0148421	0.0163943	-0.905324	0.365294	0.674002	k__Bacteria	p__Firmicutes	c__Clostridia	o__Clostridiales	f__Clostridiaceae	g__Anaerosalibacter	s__Anaerosalibacter sp. Marseille-P3206
5.43462	-0.0143516	0.0158559	-0.905127	0.365398	0.674002	k__Bacteria	p__Actinobacteria	c__Actinobacteria	o__Actinomycetales	f__Actinomycetaceae	g__Actinomyces	s__Actinomyces dentalis
5.13002	0.0174164	0.0193007	0.902369	0.366861	0.676221	k__Bacteria	p__Actinobacteria	c__Actinobacteria	o__Bifidobacteriales	f__Bifidobacteriaceae	g__Bifidobacterium	s__Bifidobacterium subtile
12.5872	0.00683567	0.00759542	0.899973	0.368135	0.678088	k__Bacteria	p__Firmicutes	c__Clostridia	o__Clostridiales	f__Lachnospiraceae	g__Oribacterium	s__Oribacterium parvum
367.878	0.015486	0.0172174	0.89944	0.368418	0.678129	k__Bacteria	p__Bacteroidetes	c__Bacteroidia	o__Bacteroidales	f__Rikenellaceae	g__Alistipes	s__Alistipes sp. CAG:53
23.4362	-0.0086329	0.00961593	-0.897771	0.369308	0.678846	k__Bacteria	p__Firmicutes	c__Clostridia	o__Clostridiales	f__Clostridiales__na	g__Clostridiales__na	s__butyrate-producing bacterium SM4/1
4.4811	0.0109671	0.0122165	0.897729	0.36933	0.678846	k__Bacteria	p__Fusobacteria	c__Fusobacteriia	o__Fusobacteriales	f__Fusobacteriaceae	g__Fusobacterium	s__Fusobacterium sp. CM21
16.9515	-0.010633	0.0118629	-0.896324	0.37008	0.679744	k__Bacteria	p__Firmicutes	c__Clostridia	o__Clostridiales	f__Lachnospiraceae	g__Fusicatenibacter	s__Fusicatenibacter sp. 2789STDY5834925
14.1457	0.0127184	0.0142026	0.8955	0.37052	0.680071	k__Bacteria	p__Bacteria__na	c__Bacteria__na	o__Bacteria__na	f__Bacteria__na	g__Bacteria__na	s__uncultured bacterium EB5
3.29617	0.0156448	0.0174831	0.894853	0.370865	0.680225	k__Bacteria	p__Spirochaetes	c__Spirochaetia	o__Spirochaetales	f__Spirochaetaceae	g__Treponema	s__Treponema pedis
9.07912	-0.00864637	0.00969227	-0.89209	0.372345	0.682457	k__Bacteria	p__Bacteroidetes	c__Bacteroidia	o__Bacteroidales	f__Porphyromonadaceae	g__Dysgonomonas	s__Dysgonomonas__uc
1.72328	0.0204542	0.0229459	0.891413	0.372707	0.68264	k__Bacteria	p__Firmicutes	c__Tissierellia	o__Tissierellales	f__Peptoniphilaceae	g__Peptoniphilus	s__Peptoniphilus senegalensis
1.37592	-0.0247211	0.0278198	-0.888613	0.374211	0.684911	k__Bacteria	p__Firmicutes	c__Clostridia	o__Clostridiales	f__Clostridiales__na	g__Clostridiales__na	s__Clostridiales bacterium Marseille-P2986
4.05099	-0.0171948	0.0193829	-0.887114	0.375018	0.685905	k__Bacteria	p__Firmicutes	c__Bacilli	o__Lactobacillales	f__Streptococcaceae	g__Streptococcus	s__Streptococcus orisasini
6.03043	0.015461	0.0174558	0.885722	0.375767	0.686793	k__Bacteria	p__Bacteroidetes	c__Bacteroidia	o__Bacteroidales	f__Porphyromonadaceae	g__Barnesiella	s__Barnesiella__uc
46.9835	0.0139528	0.0158388	0.880925	0.378359	0.690686	k__Bacteria	p__Firmicutes	c__Erysipelotrichia	o__Erysipelotrichales	f__Erysipelotrichaceae	g__Coprobacillus	s__Coprobacillus sp. 3_3_56FAA
3.75929	0.0101643	0.0115421	0.880628	0.378519	0.690686	k__Bacteria	p__Firmicutes	c__Tissierellia	o__Tissierellia__na	f__Tissierellia__na	g__Tepidimicrobium	s__Tepidimicrobium xylanilyticum
17.6014	0.0247762	0.0281627	0.879751	0.378994	0.690686	k__Bacteria	p__Firmicutes	c__Clostridia	o__Clostridiales	f__Clostridiaceae	g__Clostridium	s__Clostridium sp. CAG:470
32.997	0.00898249	0.0102142	0.879413	0.379177	0.690686	k__Bacteria	p__Firmicutes	c__Clostridia	o__Clostridiales	f__Peptostreptococcaceae	g__Peptostreptococcaceae__na	s__[Clostridium] hiranonis
108.788	0.0739828	0.0841361	0.879323	0.379226	0.690686	k__Bacteria	p__Firmicutes	c__Clostridia	o__Clostridiales	f__Clostridiaceae	g__Clostridium	s__Clostridium sp. CAG:389
2.55117	-0.0117452	0.0134152	-0.875515	0.381294	0.693966	k__Bacteria	p__Bacteroidetes	c__Bacteroidia	o__Marinilabiliales	f__Marinifilaceae	g__Marinifilum	s__Marinifilum fragile
35.2126	-0.00958932	0.010977	-0.873587	0.382343	0.695264	k__Bacteria	p__Firmicutes	c__Clostridia	o__Clostridiales	f__Oscillospiraceae	g__Oscillibacter	s__Oscillibacter sp. KLE 1745
3431.75	-0.00833195	0.00954162	-0.873222	0.382542	0.695264	k__Bacteria	p__Firmicutes	c__Clostridia	o__Clostridiales	f__Lachnospiraceae	g__Coprococcus	s__Coprococcus comes
14.9724	0.0246852	0.0284047	0.869053	0.384818	0.698565	k__Bacteria	p__Firmicutes	c__Clostridia	o__Clostridiales	f__Clostridiaceae	g__Clostridium	s__Clostridium sp. 28_17
17.8859	-0.00809056	0.00931116	-0.86891	0.384896	0.698565	k__Bacteria	p__Firmicutes	c__Clostridia	o__Clostridiales	f__Clostridiales__na	g__Clostridiales__na	s__Clostridiales bacterium VE202-15
82.1471	-0.018074	0.0208419	-0.867193	0.385836	0.699756	k__Bacteria	p__Bacteroidetes	c__Bacteroidia	o__Bacteroidales	f__Prevotellaceae	g__Prevotella	s__Prevotella sp. CAG:487
43.1932	-0.0111055	0.0128131	-0.866728	0.386091	0.699756	k__Bacteria	p__Proteobacteria	c__Deltaproteobacteria	o__Desulfovibrionales	f__Desulfovibrionaceae	g__Desulfovibrionaceae__uc	s__Desulfovibrionaceae__uc
7.89855	0.00735535	0.00849378	0.865969	0.386507	0.700022	k__Bacteria	p__Firmicutes	c__Clostridia	o__Clostridiales	f__Lachnospiraceae	g__Lachnospiraceae__na	s__Lachnospiraceae bacterium NK4A136
4.00849	-0.0551345	0.0639047	-0.862761	0.388269	0.702723	k__Bacteria	p__Proteobacteria	c__Gammaproteobacteria	o__Enterobacterales	f__Enterobacteriaceae	g__Kluyvera	s__Kluyvera cryocrescens
3.04094	0.00971076	0.0112781	0.861029	0.389222	0.703922	k__Bacteria	p__Firmicutes	c__Clostridia	o__Clostridiales	f__Clostridiaceae	g__Clostridium	s__Clostridium cylindrosporum
33.6254	0.00719993	0.00836642	0.860574	0.389473	0.703922	k__Bacteria	p__Firmicutes	c__Clostridia	o__Clostridiales	f__Clostridiaceae	g__Clostridium	s__Clostridium sp. Marseille-P2538
4.85145	0.0104606	0.0121726	0.859359	0.390143	0.704223	k__Bacteria	p__Firmicutes	c__Clostridia	o__Clostridiales	f__Syntrophomonadaceae	g__Syntrophomonas	s__Syntrophomonas wolfei
1.00746	0.0223258	0.0259881	0.859079	0.390297	0.704223	k__Bacteria	p__Bacteroidetes	c__Sphingobacteriia	o__Sphingobacteriales	f__Sphingobacteriaceae	g__Pseudosphingobacterium	s__Pseudosphingobacterium domesticum
347.125	0.021992	0.0256079	0.858798	0.390452	0.704223	k__Bacteria	p__Proteobacteria	c__Gammaproteobacteria	o__Pasteurellales	f__Pasteurellaceae	g__Haemophilus	s__Haemophilus__uc
4.6736	-0.0120866	0.0140824	-0.858278	0.390739	0.704251	k__Bacteria	p__Fibrobacteres	c__Fibrobacteria	o__Fibrobacterales	f__Fibrobacteraceae	g__Fibrobacter	s__Fibrobacter intestinalis
1.85565	-0.0233348	0.027208	-0.857643	0.391089	0.704395	k__Bacteria	p__Bacteroidetes	c__Sphingobacteriia	o__Sphingobacteriales	f__Sphingobacteriaceae	g__Solitalea	s__Solitalea canadensis
5.95695	0.00921364	0.0107503	0.857061	0.391411	0.704485	k__Bacteria	p__Actinobacteria	c__Actinobacteria	o__Actinobacteria__na	f__Actinobacteria__na	g__Actinobacteria__na	s__Actinobacteria bacterium 66_15
19.2865	-0.0170139	0.0198842	-0.855649	0.392192	0.705403	k__Bacteria	p__Actinobacteria	c__Actinobacteria	o__Actinomycetales	f__Actinomycetaceae	g__Actinomyces	s__Actinomyces sp. ICM58
765.623	0.0203616	0.0238673	0.853117	0.393594	0.707435	k__Bacteria	p__Firmicutes	c__Bacilli	o__Lactobacillales	f__Streptococcaceae	g__Streptococcus	s__Streptococcus thermophilus
4.77299	-0.00886463	0.0104178	-0.850915	0.394816	0.708687	k__Bacteria	p__Firmicutes	c__Bacilli	o__Bacillales	f__Bacillaceae	g__Bacillus	s__Bacillus coagulans
12421.7	0.00716186	0.00842092	0.850484	0.395056	0.708687	k__Bacteria	p__Firmicutes	c__Clostridia	o__Clostridiales	f__Ruminococcaceae	g__Ruminococcus	s__uncultured Ruminococcus sp.
1.61651	-0.0239197	0.0281279	-0.850389	0.395109	0.708687	k__Bacteria	p__Bacteroidetes	c__Sphingobacteriia	o__Sphingobacteriales	f__Sphingobacteriaceae	g__Sphingobacterium	s__Sphingobacterium mizutaii
63.1148	-0.0205629	0.024289	-0.846593	0.397222	0.711419	k__Bacteria	p__Proteobacteria	c__Betaproteobacteria	o__Burkholderiales	f__Burkholderiales__na	g__Burkholderiales__na	s__Burkholderiales bacterium 1_1_47
1.77854	-0.0200477	0.0236861	-0.846393	0.397334	0.711419	k__Bacteria	p__Proteobacteria	c__Gammaproteobacteria	o__Enterobacterales	f__Yersiniaceae	g__Yersinia	s__Yersinia enterocolitica
6.5064	-0.00949878	0.0112255	-0.846179	0.397453	0.711419	k__Bacteria	p__Firmicutes	c__Clostridia	o__Clostridiales	f__Lachnospiraceae	g__Herbinix	s__Herbinix__uc
4.56895	0.0113299	0.0134048	0.84521	0.397993	0.711631	k__Bacteria	p__Proteobacteria	c__Epsilonproteobacteria	o__Campylobacterales	f__Campylobacteraceae	g__Campylobacter	s__Campylobacter fetus
2.15083	0.0103149	0.0122072	0.844985	0.398119	0.711631	k__Bacteria	p__Firmicutes	c__Bacilli	o__Lactobacillales	f__Carnobacteriaceae	g__Granulicatella	s__Granulicatella balaenopterae
12.4338	-0.00832406	0.00989725	-0.841048	0.400321	0.714628	k__Bacteria	p__Firmicutes	c__Clostridia	o__Clostridiales	f__Clostridiaceae	g__Clostridium	s__Clostridium cadaveris
7.52839	0.01021	0.0121402	0.841004	0.400346	0.714628	k__Bacteria	p__Bacteria__na	c__Bacteria__na	o__Bacteria__na	f__Bacteria__na	g__Bacteria__na	s__uncultured bacterium EB1
173.511	-0.0114536	0.0136398	-0.839718	0.401066	0.715423	k__Bacteria	p__Actinobacteria	c__Coriobacteriia	o__Eggerthellales	f__Eggerthellaceae	g__Eggerthella	s__Eggerthella lenta
5.71374	0.00829964	0.00989658	0.838636	0.401673	0.716014	k__Bacteria	p__Spirochaetes	c__Spirochaetia	o__Spirochaetales	f__Spirochaetaceae	g__Treponema	s__Treponema denticola
32.7968	0.00730996	0.00873013	0.837325	0.40241	0.716744	k__Bacteria	p__Firmicutes	c__Clostridia	o__Clostridiales	f__Eubacteriaceae	g__Eubacterium	s__Eubacterium xylanophilum
6.97638	-0.0115791	0.0138395	-0.836665	0.402781	0.716744	k__Bacteria	p__Firmicutes	c__Clostridia	o__Clostridiales	f__Clostridiaceae	g__Clostridium	s__Clostridium clostridioforme CAG:132
11.542	0.00775914	0.00927644	0.836436	0.40291	0.716744	k__Bacteria	p__Firmicutes	c__Clostridia	o__Clostridiales	f__Lachnospiraceae	g__Cellulosilyticum	s__Cellulosilyticum ruminicola
0.836385	-0.0253423	0.0303288	-0.835584	0.403389	0.717106	k__Bacteria	p__Proteobacteria	c__Betaproteobacteria	o__Burkholderiales	f__Comamonadaceae	g__Pelomonas	s__Pelomonas sp. Root1217
5.89492	-0.0138076	0.0165424	-0.834675	0.403901	0.717525	k__Bacteria	p__Bacteroidetes	c__Bacteroidia	o__Bacteroidales	f__Porphyromonadaceae	g__Porphyromonadaceae__na	s__Porphyromonadaceae bacterium FC4
116.872	-0.0683956	0.0820981	-0.833097	0.40479	0.718613	k__Bacteria	p__Proteobacteria	c__Betaproteobacteria	o__Burkholderiales	f__Sutterellaceae	g__Sutterella	s__Sutterella sp. 63_29
12.419	-0.0166386	0.020064	-0.82928	0.406946	0.721947	k__Bacteria	p__Firmicutes	c__Negativicutes	o__Veillonellales	f__Veillonellaceae	g__Megasphaera	s__Megasphaera sp. DJF_B143
15.5067	0.0076915	0.00929633	0.827369	0.408028	0.723273	k__Bacteria	p__Firmicutes	c__Clostridia	o__Clostridiales	f__Peptococcaceae	g__Desulfitobacterium	s__Desulfitobacterium hafniense
1.35741	-0.0553214	0.066896	-0.826977	0.40825	0.723273	k__Bacteria	p__Bacteroidetes	c__Bacteroidia	o__Bacteroidales	f__Prevotellaceae	g__Prevotella	s__Prevotella sp. Sc00044
4.19865	0.0103799	0.0125822	0.824967	0.40939	0.724799	k__Bacteria	p__Firmicutes	c__Negativicutes	o__Selenomonadales	f__Sporomusaceae	g__Propionispora	s__Propionispora vibrioides
5.51187	0.0121017	0.0146808	0.824317	0.40976	0.72496	k__Bacteria	p__Firmicutes	c__Clostridia	o__Clostridiales	f__Clostridiaceae	g__Clostridium	s__Clostridium acidisoli
1209.06	0.00770858	0.00939481	0.820515	0.411923	0.727862	k__Bacteria	p__Firmicutes	c__Clostridia	o__Clostridiales	f__Lachnospiraceae	g__Lachnospira	s__uncultured Lachnospira sp.
61.5439	-0.0135899	0.016564	-0.820448	0.411961	0.727862	k__Bacteria	p__Firmicutes	c__Clostridia	o__Clostridiales	f__Ruminococcaceae	g__Ruminococcus	s__Ruminococcus sp. CAG:563
0.518914	0.0330946	0.0403541	0.820104	0.412157		k__Bacteria	p__Firmicutes	c__Bacilli	o__Bacillales	f__Paenibacillaceae	g__Paenibacillus	s__Paenibacillus sp. 1-18
2.58989	0.0204546	0.0249589	0.819531	0.412484	0.728292	k__Bacteria	p__Firmicutes	c__Bacilli	o__Lactobacillales	f__Lactobacillaceae	g__Lactobacillus	s__Lactobacillus amylovorus
315.018	-0.0089251	0.0109059	-0.818375	0.413143	0.728961	k__Bacteria	p__Firmicutes	c__Clostridia	o__Clostridiales	f__Ruminococcaceae	g__Ruminococcus	s__Ruminococcus sp. CAG:9-related_41_34
2.14901	-0.012989	0.0159017	-0.816829	0.414026	0.729196	k__Bacteria	p__Bacteroidetes	c__Bacteroidia	o__Marinilabiliales	f__Marinilabiliaceae	g__Marinilabilia	s__Marinilabilia salmonicolor
63.6146	-0.00485845	0.00594845	-0.816759	0.414066	0.729196	k__Bacteria	p__Firmicutes	c__Clostridia	o__Clostridiales	f__Lachnospiraceae	g__Catonella	s__Catonella morbi
4.10076	-0.0115814	0.0141812	-0.816668	0.414118	0.729196	k__Bacteria	p__Bacteroidetes	c__Bacteroidia	o__Bacteroidales	f__Porphyromonadaceae	g__Porphyromonadaceae__na	s__Porphyromonadaceae bacterium CG2_30_38_12
15.3111	-0.0290148	0.0355883	-0.81529	0.414906	0.729917	k__Bacteria	p__Firmicutes	c__Negativicutes	o__Veillonellales	f__Veillonellaceae	g__Megasphaera	s__Megasphaera elsdenii CAG:570
1.31781	-0.0286477	0.0351518	-0.81497	0.415089	0.729917	k__Bacteria	p__Firmicutes	c__Bacilli	o__Lactobacillales	f__Lactobacillaceae	g__Lactobacillus	s__Lactobacillus parabuchneri
28.7782	0.00593646	0.00729334	0.813956	0.41567	0.730445	k__Bacteria	p__Firmicutes	c__Bacilli	o__Bacillales	f__Bacillales__uc	g__Bacillales__uc	s__Bacillales__uc
4644.64	-0.00737779	0.00907727	-0.812776	0.416346	0.730802	k__Bacteria	p__Firmicutes	c__Clostridia	o__Clostridiales	f__Lachnospiraceae	g__Blautia	s__[Ruminococcus] torques
452.361	0.0414019	0.0509486	0.81262	0.416436	0.730802	k__Bacteria	p__Firmicutes	c__Firmicutes__na	o__Firmicutes__na	f__Firmicutes__na	g__Firmicutes__na	s__Firmicutes bacterium CAG:555
11.3763	0.0127425	0.0156977	0.811743	0.416939	0.731191	k__Bacteria	p__Actinobacteria	c__Actinobacteria	o__Micrococcales	f__Sanguibacteraceae	g__Sanguibacter	s__Sanguibacter keddieii
317.109	0.0175527	0.021637	0.811232	0.417232	0.731211	k__Bacteria	p__Firmicutes	c__Clostridia	o__Clostridiales	f__Clostridiaceae	g__Clostridium	s__Clostridium sp. CAG:245_30_32
47.9591	0.00771006	0.00951088	0.810657	0.417563	0.731298	k__Bacteria	p__Firmicutes	c__Clostridia	o__Clostridiales	f__Ruminococcaceae	g__Ruminococcaceae__na	s__Ruminococcaceae bacterium FB2012
15.5239	-0.0168518	0.0208335	-0.808882	0.418583	0.732369	k__Bacteria	p__Actinobacteria	c__Coriobacteriia	o__Coriobacteriales	f__Coriobacteriaceae	g__Enorma	s__Enorma massiliensis
143.436	-0.00366438	0.00453356	-0.808278	0.418931	0.732369	k__Bacteria	p__Firmicutes	c__Clostridia	o__Clostridiales	f__Eubacteriaceae	g__Eubacterium	s__Eubacterium plexicaudatum
64.5531	0.004065	0.00503123	0.807954	0.419117	0.732369	k__Bacteria	p__Firmicutes	c__Clostridia	o__Clostridiales	f__Lachnospiraceae	g__Anaerobium	s__Anaerobium acetethylicum
12.5375	0.0288357	0.0357039	0.807634	0.419302	0.732369	k__Bacteria	p__Firmicutes	c__Bacilli	o__Lactobacillales	f__Lactobacillaceae	g__Lactobacillus	s__Lactobacillus brevis
0.704927	-0.0507211	0.0628869	-0.806545	0.419928		k__Bacteria	p__Bacteria__na	c__Bacteria__na	o__Bacteria__na	f__Bacteria__na	g__Bacteria__na	s__uncultured bacterium 34R1
6.68782	-0.0156169	0.0193933	-0.805274	0.420662	0.733919	k__Bacteria	p__Actinobacteria	c__Actinobacteria	o__Bifidobacteriales	f__Bifidobacteriaceae	g__Scardovia	s__Scardovia wiggsiae
81.4266	-0.0044403	0.00551512	-0.805114	0.420754	0.733919	k__Bacteria	p__Firmicutes	c__Clostridia	o__Clostridiales	f__Ruminococcaceae	g__Ruminococcus	s__Ruminococcus gauvreauii
16.4302	-0.00904797	0.0112489	-0.804346	0.421197	0.7342	k__Bacteria	p__Firmicutes	c__Clostridia	o__Clostridiales	f__Peptostreptococcaceae	g__Peptostreptococcus	s__Peptostreptococcus anaerobius
13.2078	0.00876879	0.0109364	0.801797	0.422671	0.735636	k__Bacteria	p__Synergistetes	c__Synergistia	o__Synergistales	f__Synergistaceae	g__Pyramidobacter	s__Pyramidobacter sp. C12-8
31.9784	0.0082171	0.0102499	0.801672	0.422743	0.735636	k__Bacteria	p__Actinobacteria	c__Actinobacteria	o__Bifidobacteriales	f__Bifidobacteriaceae	g__Gardnerella	s__Gardnerella vaginalis
4.31398	0.00829529	0.0103545	0.801128	0.423058	0.735636	k__Bacteria	p__Firmicutes	c__Clostridia	o__Clostridiales	f__Peptococcaceae	g__Desulfitobacterium	s__Desulfitobacterium dichloroeliminans
147.151	-0.0101475	0.0126692	-0.800962	0.423154	0.735636	k__Bacteria	p__Proteobacteria	c__Epsilonproteobacteria	o__Campylobacterales	f__Campylobacteraceae	g__Campylobacter	s__Campylobacter__uc
588.339	0.0548816	0.0685727	0.800342	0.423513	0.735769	k__Bacteria	p__Firmicutes	c__Clostridia	o__Clostridiales	f__Clostridiaceae	g__Clostridium	s__Clostridium sp. CAG:167
1597.74	-0.0046181	0.00577386	-0.79983	0.423809	0.735792	k__Bacteria	p__Firmicutes	c__Clostridia	o__Clostridiales	f__Peptostreptococcaceae	g__Clostridioides	s__Clostridioides difficile
4.30753	-0.0213647	0.02678	-0.797786	0.424995	0.736659	k__Bacteria	p__Bacteroidetes	c__Bacteroidia	o__Bacteroidales	f__Porphyromonadaceae	g__Porphyromonas	s__Porphyromonas gingivicanis
621.451	0.0178496	0.0223768	0.797684	0.425054	0.736659	k__Bacteria	p__Firmicutes	c__Clostridia	o__Clostridiales	f__Clostridiaceae	g__Clostridium	s__Clostridium sp. 42_12
21387.8	-0.00770203	0.00965768	-0.797503	0.425159	0.736659	k__Bacteria	p__Firmicutes	c__Clostridia	o__Clostridiales	f__Lachnospiraceae	g__Dorea	s__Dorea__uc
3.67537	0.0177342	0.0222865	0.795739	0.426184	0.737941	k__Bacteria	p__Bacteria__na	c__Bacteria__na	o__Bacteria__na	f__Bacteria__na	g__Bacteria__na	s__uncultured bacterium Contig160
15.6462	0.0057007	0.00717649	0.794358	0.426987	0.737941	k__Bacteria	p__Firmicutes	c__Tissierellia	o__Tissierellales	f__Peptoniphilaceae	g__Anaerococcus	s__Anaerococcus hydrogenalis
2697.83	0.016844	0.0212104	0.794136	0.427116	0.737941	k__Bacteria	p__Firmicutes	c__Clostridia	o__Clostridiales	f__Eubacteriaceae	g__Eubacterium	s__Eubacterium sp. CAG:38
1.0071	-0.0254197	0.0320297	-0.793628	0.427412	0.737941	k__Bacteria	p__Bacteroidetes	c__Sphingobacteriia	o__Sphingobacteriales	f__Sphingobacteriaceae	g__Pedobacter	s__Pedobacter africanus
76.5248	-0.00884521	0.0111454	-0.793621	0.427416	0.737941	k__Bacteria	p__Firmicutes	c__Clostridia	o__Clostridiales	f__Lachnospiraceae	g__Coprococcus	s__Coprococcus sp. CAG:782
31.4467	-0.0121566	0.0153393	-0.79251	0.428063	0.737941	k__Bacteria	p__Bacteroidetes	c__Bacteroidia	o__Bacteroidales	f__Bacteroidaceae	g__Bacteroides	s__Bacteroides sp. CAG:1060_57_27
118.714	0.00981109	0.0123867	0.792068	0.428321	0.737941	k__Bacteria	p__Firmicutes	c__Erysipelotrichia	o__Erysipelotrichales	f__Erysipelotrichaceae	g__Holdemania	s__Holdemania sp. Marseille-P2844
184.127	-0.00980871	0.0123869	-0.791862	0.428441	0.737941	k__Bacteria	p__Firmicutes	c__Bacilli	o__Lactobacillales	f__Lactobacillaceae	g__Lactobacillus	s__Lactobacillus rogosae
2.28061	0.010541	0.0133121	0.791839	0.428455	0.737941	k__Bacteria	p__Firmicutes	c__Clostridia	o__Clostridiales	f__Ruminococcaceae	g__Ruminiclostridium	s__[Clostridium] termitidis
1.31081	-0.02808	0.0356562	-0.787522	0.430977	0.741483	k__Bacteria	p__Actinobacteria	c__Actinobacteria	o__Micrococcales	f__Micrococcaceae	g__Paenarthrobacter	s__Paenarthrobacter nicotinovorans
71.898	0.00542164	0.006886	0.787343	0.431081	0.741483	k__Bacteria	p__Firmicutes	c__Clostridia	o__Clostridiales	f__Lachnospiraceae	g__Anaerostipes	s__Anaerostipes sp. 494a
1.71625	0.0137926	0.0175397	0.786365	0.431654	0.741976	k__Bacteria	p__Firmicutes	c__Bacilli	o__Lactobacillales	f__Aerococcaceae	g__Globicatella	s__Globicatella__uc
27.3961	0.00378091	0.00481412	0.785379	0.432232	0.742478	k__Bacteria	p__Firmicutes	c__Clostridia	o__Clostridiales	f__Lachnospiraceae	g__Tyzzerella	s__[Clostridium] neopropionicum
3.03646	0.0151256	0.0193015	0.783647	0.433247	0.743544	k__Bacteria	p__Bacteroidetes	c__Bacteroidetes__na	o__Bacteroidetes__na	f__Bacteroidetes__na	g__Bacteroidetes__na	s__Bacteroidetes bacterium 41-46
24.0119	-0.0522653	0.0667206	-0.783346	0.433424	0.743544	k__Bacteria	p__Actinobacteria	c__Actinobacteria	o__Micrococcales	f__Cellulomonadaceae	g__Cellulomonas	s__Cellulomonas carbonis
1.91659	-0.0212985	0.0272674	-0.781097	0.434745	0.745319	k__Bacteria	p__Bacteroidetes	c__Cytophagia	o__Cytophagales	f__Cytophagaceae	g__Ohtaekwangia	s__Ohtaekwangia koreensis
14.9383	0.053611	0.0686936	0.780437	0.435134	0.745493	k__Bacteria	p__Firmicutes	c__Clostridia	o__Clostridiales	f__Clostridiaceae	g__Clostridium	s__Clostridium sp. CAG:715
3.32313	-0.0131928	0.0169301	-0.779252	0.435831	0.745957	k__Bacteria	p__Proteobacteria	c__Gammaproteobacteria	o__Aeromonadales	f__Succinivibrionaceae	g__Ruminobacter	s__Ruminobacter amylophilus
67.7401	0.0211824	0.0271917	0.779002	0.435979	0.745957	k__Bacteria	p__Proteobacteria	c__Gammaproteobacteria	o__Pasteurellales	f__Pasteurellaceae	g__Haemophilus	s__Haemophilus parainfluenzae
17.9968	-0.00586538	0.00753851	-0.778055	0.436536	0.74642	k__Bacteria	p__Firmicutes	c__Clostridia	o__Clostridiales	f__Lachnospiraceae	g__Lachnospiraceae__na	s__Lachnospiraceae bacterium YSB2008
7.30878	0.0122479	0.0157527	0.777513	0.436856	0.746476	k__Bacteria	p__Firmicutes	c__Clostridia	o__Clostridiales	f__Peptostreptococcaceae	g__Paraclostridium	s__Paraclostridium bifermentans
120.499	0.00592711	0.00763224	0.776589	0.437401	0.746562	k__Bacteria	p__Firmicutes	c__Clostridia	o__Clostridiales	f__Clostridiaceae	g__Lactonifactor	s__Lactonifactor longoviformis
7.59627	-0.0164676	0.0212087	-0.776453	0.437481	0.746562	k__Bacteria	p__Synergistetes	c__Synergistia	o__Synergistales	f__Synergistaceae	g__Cloacibacillus	s__Cloacibacillus evryensis
9.52777	-0.0162565	0.0209555	-0.775763	0.437889	0.746767	k__Bacteria	p__Firmicutes	c__Negativicutes	o__Acidaminococcales	f__Acidaminococcaceae	g__Acidaminococcus	s__Acidaminococcus sp. CAG:542
7.38466	0.00517931	0.00671027	0.771848	0.440204	0.750224	k__Bacteria	p__Firmicutes	c__Clostridia	o__Clostridiales	f__Lachnospiraceae	g__Butyrivibrio	s__Butyrivibrio sp. VCB2006
58.8251	-0.0140228	0.0181811	-0.771285	0.440538	0.750301	k__Bacteria	p__Bacteroidetes	c__Bacteroidia	o__Bacteroidales	f__Bacteroidaceae	g__Bacteroides	s__Bacteroides sp. HMSC068A09
13.2505	-0.00973735	0.0126338	-0.770737	0.440863	0.750362	k__Bacteria	p__Actinobacteria	c__Actinobacteria	o__Bifidobacteriales	f__Bifidobacteriaceae	g__Bifidobacterium	s__Bifidobacterium lemurum
211.238	-0.0114449	0.0148631	-0.770016	0.44129	0.750405	k__Bacteria	p__Firmicutes	c__Clostridia	o__Clostridiales	f__Lachnospiraceae	g__Blautia	s__Blautia sp. Marseille-P3201T
1.32692	0.0231685	0.0300998	0.769721	0.441465	0.750405	k__Bacteria	p__Firmicutes	c__Bacilli	o__Lactobacillales	f__Streptococcaceae	g__Streptococcus	s__Streptococcus sp. HMSC034E12
262.438	-0.00607522	0.00789982	-0.769033	0.441874	0.750608	k__Bacteria	p__Firmicutes	c__Clostridia	o__Clostridiales	f__Lachnospiraceae	g__Blautia	s__Blautia schinkii
9.32831	0.0163503	0.0212893	0.768009	0.442482	0.750769	k__Bacteria	p__Firmicutes	c__Negativicutes	o__Veillonellales	f__Veillonellaceae	g__Veillonella	s__Veillonella sp. 6_1_27
2.60006	0.00871509	0.0113492	0.767901	0.442546	0.750769	k__Bacteria	p__Firmicutes	c__Clostridia	o__Clostridiales	f__Clostridiaceae	g__Clostridium	s__Clostridium tetanomorphum
23.9396	0.00839353	0.0109844	0.764129	0.444791	0.754084	k__Bacteria	p__Firmicutes	c__Clostridia	o__Clostridiales	f__Lachnospiraceae	g__Lachnospiraceae__na	s__Lachnospiraceae bacterium AD3010
92.608	0.00381567	0.00500174	0.762867	0.445543	0.754867	k__Bacteria	p__Firmicutes	c__Clostridia	o__Clostridiales	f__Lachnospiraceae	g__Anaerostipes	s__Anaerostipes sp. 992a
1.72921	-0.0333289	0.043791	-0.761091	0.446603	0.756169	k__Bacteria	p__Proteobacteria	c__Gammaproteobacteria	o__Enterobacterales	f__Enterobacteriaceae	g__Escherichia	s__Escherichia sp. B1147
1088.03	0.0138209	0.0181994	0.759415	0.447604	0.756974	k__Bacteria	p__Firmicutes	c__Clostridia	o__Clostridiales	f__Ruminococcaceae	g__Ruminococcus	s__Ruminococcus sp. CAG:108-related_41_35
488.778	0.0168739	0.0222458	0.75852	0.44814	0.756974	k__Bacteria	p__Bacteroidetes	c__Bacteroidia	o__Bacteroidales	f__Bacteroidaceae	g__Bacteroides	s__Bacteroides sp. CAG:443
1094.29	0.0170721	0.0225082	0.758482	0.448162	0.756974	k__Bacteria	p__Firmicutes	c__Clostridia	o__Clostridiales	f__Lachnospiraceae	g__Roseburia	s__Roseburia sp. CAG:309
45.6605	0.00777718	0.0102554	0.758347	0.448243	0.756974	k__Bacteria	p__Firmicutes	c__Clostridia	o__Clostridiales	f__Lachnospiraceae	g__Lachnospiraceae__na	s__Lachnospiraceae bacterium V9D3004
9.99162	-0.00653866	0.0086405	-0.756745	0.449203	0.757983	k__Bacteria	p__Firmicutes	c__Clostridia	o__Clostridiales	f__Ruminococcaceae	g__Ruminiclostridium	s__[Clostridium] papyrosolvens
8.55959	0.00650664	0.00860627	0.756036	0.449628	0.757983	k__Bacteria	p__Firmicutes	c__Erysipelotrichia	o__Erysipelotrichales	f__Erysipelotrichaceae	g__Eggerthia	s__Eggerthia catenaformis
4.42034	-0.0299726	0.0396521	-0.75589	0.449715	0.757983	k__Bacteria	p__Proteobacteria	c__Gammaproteobacteria	o__Enterobacterales	f__Enterobacteriaceae	g__Kluyvera	s__Kluyvera__uc
18.0152	-0.0105423	0.0139827	-0.753954	0.450877	0.758648	k__Bacteria	p__Firmicutes	c__Clostridia	o__Clostridiales	f__Clostridiaceae	g__Clostridium	s__Clostridium sp. DSM 8431
1.47687	0.0165778	0.0219886	0.753927	0.450893	0.758648	k__Bacteria	p__Actinobacteria	c__Actinobacteria	o__Actinomycetales	f__Actinomycetaceae	g__Actinomyces	s__Actinomyces sp. oral taxon 180
34.6384	0.0137034	0.0181797	0.753773	0.450986	0.758648	k__Bacteria	p__Firmicutes	c__Bacilli	o__Lactobacillales	f__Streptococcaceae	g__Lactococcus	s__Lactococcus garvieae
211.627	0.0151064	0.0200737	0.752544	0.451724	0.759048	k__Bacteria	p__Firmicutes	c__Firmicutes__na	o__Firmicutes__na	f__Firmicutes__na	g__Firmicutes__na	s__Firmicutes bacterium CAG:176_59_8
83.9704	-0.010254	0.0136283	-0.752405	0.451808	0.759048	k__Bacteria	p__Firmicutes	c__Bacilli	o__Lactobacillales	f__Streptococcaceae	g__Streptococcus	s__Streptococcus pneumoniae
1.26077	0.0138722	0.018472	0.750984	0.452662	0.759993	k__Bacteria	p__Firmicutes	c__Bacilli	o__Bacillales	f__Paenibacillaceae	g__Fontibacillus	s__Fontibacillus panacisegetis
1.36229	0.0181081	0.0241557	0.749641	0.453471	0.760559	k__Bacteria	p__Firmicutes	c__Tissierellia	o__Tissierellales	f__Peptoniphilaceae	g__Anaerococcus	s__Anaerococcus sp. HMSC065G05
36.2341	-0.00739914	0.00987758	-0.749084	0.453806	0.760559	k__Bacteria	p__Actinobacteria	c__Coriobacteriia	o__Coriobacteriales	f__Coriobacteriaceae	g__Coriobacteriaceae__na	s__Coriobacteriaceae bacterium 68-1-3
20.4398	-0.00729631	0.00974184	-0.748966	0.453877	0.760559	k__Bacteria	p__Actinobacteria	c__Coriobacteriia	o__Coriobacteriales	f__Atopobiaceae	g__Olsenella	s__Olsenella sp. oral taxon 807
18.3871	0.0105951	0.0141637	0.748046	0.454432	0.760992	k__Bacteria	p__Bacteroidetes	c__Bacteroidia	o__Bacteroidales	f__Rikenellaceae	g__Mucinivorans	s__Mucinivorans hirudinis
19.6532	0.0139348	0.0186553	0.746962	0.455087	0.760992	k__Bacteria	p__Firmicutes	c__Firmicutes__na	o__Firmicutes__na	f__Firmicutes__na	g__Firmicutes__na	s__Firmicutes bacterium CAG:449
5537.18	0.0229633	0.0307482	0.746817	0.455174	0.760992	k__Bacteria	p__Bacteroidetes	c__Bacteroidia	o__Bacteroidales	f__Bacteroidaceae	g__Bacteroides	s__Bacteroides coprocola CAG:162
10.9108	0.0570943	0.0764727	0.746597	0.455307	0.760992	k__Bacteria	p__Proteobacteria	c__Betaproteobacteria	o__Burkholderiales	f__Sutterellaceae	g__Sutterella	s__Sutterella sp. CAG:351
367.414	0.0229559	0.0308103	0.745071	0.456229	0.762043	k__Bacteria	p__Verrucomicrobia	c__Verrucomicrobiae	o__Verrucomicrobiales	f__Akkermansiaceae	g__Akkermansia	s__Akkermansia sp. 54_46
4.98764	-0.0134758	0.0181195	-0.743719	0.457046	0.762625	k__Bacteria	p__Bacteroidetes	c__Bacteroidia	o__Bacteroidales	f__Porphyromonadaceae	g__Porphyromonas	s__Porphyromonas asaccharolytica
0.744129	-0.0415188	0.0558863	-0.742916	0.457533		k__Bacteria	p__Proteobacteria	c__Gammaproteobacteria	o__Enterobacterales	f__Morganellaceae	g__Proteus	s__Proteus mirabilis
27.4658	0.00629217	0.00846991	0.742886	0.457551	0.762625	k__Bacteria	p__Firmicutes	c__Clostridia	o__Clostridiales	f__Peptostreptococcaceae	g__Peptostreptococcaceae__na	s__Peptostreptococcaceae bacterium pGA-8
176.828	0.00430867	0.00580017	0.742852	0.457571	0.762625	k__Bacteria	p__Firmicutes	c__Clostridia	o__Clostridiales	f__Ruminococcaceae	g__Acetivibrio	s__Acetivibrio ethanolgignens
177.136	0.0193956	0.0261291	0.742297	0.457907	0.762625	k__Bacteria	p__Firmicutes	c__Clostridia	o__Clostridiales	f__Ruminococcaceae	g__Ruminococcus	s__Ruminococcus sp. CAG:57
2.59512	0.0109802	0.0148108	0.74136	0.458475	0.762625	k__Bacteria	p__Firmicutes	c__Clostridia	o__Clostridiales	f__Peptococcaceae	g__Desulfotomaculum	s__Desulfotomaculum sp. 46_296
4.77542	0.0147401	0.0198889	0.741118	0.458622	0.762625	k__Bacteria	p__Actinobacteria	c__Actinobacteria	o__Bifidobacteriales	f__Bifidobacteriaceae	g__Alloscardovia	s__Alloscardovia__uc
7.30346	-0.00748022	0.0100934	-0.741103	0.458631	0.762625	k__Bacteria	p__Firmicutes	c__Clostridia	o__Clostridiales	f__Clostridiaceae	g__Clostridium	s__Clostridium sulfidigenes
70.3256	-0.00416322	0.00562861	-0.739654	0.45951	0.763095	k__Bacteria	p__Firmicutes	c__Clostridia	o__Clostridiales	f__Lachnospiraceae	g__Lachnospiraceae__na	s__Lachnospiraceae bacterium 28-4
1.60893	0.0172072	0.0232649	0.73962	0.45953	0.763095	k__Bacteria	p__Firmicutes	c__Bacilli	o__Lactobacillales	f__Lactobacillaceae	g__Lactobacillus	s__Lactobacillus camelliae
3.62151	0.00857809	0.0116048	0.739184	0.459795	0.763095	k__Bacteria	p__Firmicutes	c__Clostridia	o__Clostridiales	f__Ruminococcaceae	g__Ruminiclostridium	s__[Clostridium] cellobioparum
6.3064	-0.0111021	0.0150328	-0.738524	0.460196	0.763273	k__Bacteria	p__Firmicutes	c__Clostridia	o__Clostridiales	f__Clostridiaceae	g__Clostridium	s__Clostridium sp. Ade.TY
236.93	-0.00716546	0.00973902	-0.735748	0.461884	0.765585	k__Bacteria	p__Firmicutes	c__Clostridia	o__Clostridiales	f__Lachnospiraceae	g__Lachnospiraceae__na	s__Lachnospiraceae bacterium 7_1_58FAA
1.76808	0.0126765	0.0172533	0.734729	0.462505	0.765801	k__Bacteria	p__Spirochaetes	c__Spirochaetia	o__Spirochaetales	f__Spirochaetaceae	g__Treponema	s__Treponema endosymbiont of Eucomonympha sp.
751.898	0.0122679	0.016711	0.734124	0.462873	0.765801	k__Bacteria	p__Firmicutes	c__Firmicutes__na	o__Firmicutes__na	f__Firmicutes__na	g__Firmicutes__na	s__Firmicutes bacterium CAG:41
23.1661	0.00577898	0.00787238	0.734082	0.462899	0.765801	k__Bacteria	p__Firmicutes	c__Clostridia	o__Clostridiales	f__Lachnospiraceae	g__Butyrivibrio	s__Butyrivibrio sp. MC2013
485.991	0.00448638	0.0061365	0.731098	0.464719	0.767567	k__Bacteria	p__Firmicutes	c__Clostridia	o__Clostridiales	f__Clostridiales__na	g__Pseudoflavonifractor	s__Pseudoflavonifractor capillosus
319.555	0.00559191	0.00765069	0.730903	0.464838	0.767567	k__Bacteria	p__Firmicutes	c__Clostridia	o__Clostridiales	f__Oscillospiraceae	g__Oscillibacter	s__Oscillibacter sp. PC13
19.0701	0.00448681	0.00613892	0.730881	0.464852	0.767567	k__Bacteria	p__Firmicutes	c__Clostridia	o__Clostridiales	f__Clostridiaceae	g__Clostridium	s__Clostridium sporogenes
3.73941	0.00798268	0.0109387	0.729767	0.465532	0.768202	k__Bacteria	p__Spirochaetes	c__Spirochaetia	o__Spirochaetales	f__Spirochaetaceae	g__Treponema	s__Treponema maltophilum
2.37059	-0.0106115	0.014569	-0.728362	0.466392	0.769133	k__Bacteria	p__Firmicutes	c__Clostridia	o__Clostridiales	f__Clostridiaceae	g__Clostridium	s__Clostridium ljungdahlii
24.5366	-0.0196181	0.0269841	-0.727024	0.467211	0.769547	k__Bacteria	p__Bacteroidetes	c__Bacteroidia	o__Bacteroidales	f__Prevotellaceae	g__Prevotella	s__Prevotella sp. oral taxon 472
6.28819	-0.00763105	0.0104969	-0.726984	0.467236	0.769547	k__Bacteria	p__Proteobacteria	c__Betaproteobacteria	o__Burkholderiales	f__Burkholderiaceae	g__Burkholderia	s__Burkholderia__uc
32.7298	-0.00449415	0.00618634	-0.726464	0.467555	0.769585	k__Bacteria	p__Firmicutes	c__Clostridia	o__Clostridiales	f__Lachnospiraceae	g__Lachnoclostridium	s__[Clostridium] hylemonae
3.54871	-0.00924846	0.0127893	-0.723142	0.469593	0.771909	k__Bacteria	p__Firmicutes	c__Clostridia	o__Clostridiales	f__Lachnospiraceae	g__Butyrivibrio	s__Butyrivibrio sp. LC3010
227.109	0.0727449	0.100615	0.723002	0.469678	0.771909	k__Bacteria	p__Firmicutes	c__Clostridia	o__Clostridiales	f__Clostridiaceae	g__Clostridium	s__Clostridium sp. CAG:245
56372.9	-0.0107967	0.0149391	-0.722711	0.469858	0.771909	k__Bacteria	p__Firmicutes	c__Clostridia	o__Clostridiales	f__Lachnospiraceae	g__Roseburia	s__Roseburia__uc
641.85	0.0105206	0.0145713	0.722007	0.47029	0.772131	k__Bacteria	p__Firmicutes	c__Clostridia	o__Clostridiales	f__Ruminococcaceae	g__Ruminococcus	s__Ruminococcus sp. 37_24
260.837	0.00726941	0.0100884	0.720573	0.471172	0.772743	k__Bacteria	p__Firmicutes	c__Clostridia	o__Clostridiales	f__Lachnospiraceae	g__Blautia	s__Blautia producta
4.72671	0.0192388	0.0267531	0.719123	0.472065	0.772743	k__Bacteria	p__Firmicutes	c__Negativicutes	o__Veillonellales	f__Veillonellaceae	g__Veillonella	s__Veillonella sp. ACP1
3.70901	-0.0112879	0.0157019	-0.718887	0.472211	0.772743	k__Bacteria	p__Firmicutes	c__Tissierellia	o__Tissierellales	f__Peptoniphilaceae	g__Parvimonas	s__Parvimonas__uc
38.8276	-0.00953167	0.0132608	-0.718784	0.472274	0.772743	k__Bacteria	p__Actinobacteria	c__Coriobacteriia	o__Eggerthellales	f__Eggerthellaceae	g__Slackia	s__Slackia__uc
17.2518	-0.00635558	0.00884604	-0.718467	0.47247	0.772743	k__Bacteria	p__Firmicutes	c__Clostridia	o__Clostridiales	f__Clostridiaceae	g__Clostridium	s__Clostridium sp. KNHs214
4.09917	-0.0130036	0.0181182	-0.717709	0.472937	0.772743	k__Bacteria	p__Bacteroidetes	c__Bacteroidia	o__Marinilabiliales	f__Marinilabiliaceae	g__Geofilum	s__Geofilum rubicundum
1.51189	-0.0347697	0.048476	-0.717256	0.473216	0.772743	k__Bacteria	p__Proteobacteria	c__Gammaproteobacteria	o__Enterobacterales	f__Enterobacteriaceae	g__Escherichia	s__Escherichia vulneris
102.291	0.0105167	0.0146727	0.716751	0.473528	0.772743	k__Bacteria	p__Firmicutes	c__Erysipelotrichia	o__Erysipelotrichales	f__Erysipelotrichaceae	g__Holdemania	s__Holdemania massiliensis
4.8895	-0.0180808	0.0252298	-0.716646	0.473593	0.772743	k__Bacteria	p__Bacteroidetes	c__Bacteroidia	o__Bacteroidales	f__Bacteroidales__na	g__Phocaeicola	s__Phocaeicola abscessus
423.989	0.100056	0.13963	0.716576	0.473636	0.772743	k__Bacteria	p__Firmicutes	c__Clostridia	o__Clostridiales	f__Clostridiaceae	g__Clostridium	s__Clostridium sp. CAG:508
15.5522	0.003781	0.00528178	0.715858	0.474079	0.772981	k__Bacteria	p__Firmicutes	c__Clostridia	o__Clostridiales	f__Lachnospiraceae	g__Herbinix	s__Herbinix luporum
46.5696	-0.00742325	0.0103801	-0.715145	0.474519	0.77317	k__Bacteria	p__Firmicutes	c__Erysipelotrichia	o__Erysipelotrichales	f__Erysipelotrichaceae	g__Coprobacillus	s__Coprobacillus sp. 8_2_54BFAA
156.304	-0.0102914	0.0143995	-0.714707	0.47479	0.77317	k__Bacteria	p__Bacteroidetes	c__Bacteroidia	o__Bacteroidales	f__Bacteroidaceae	g__Bacteroides	s__Bacteroides timonensis
273.503	-0.00937314	0.0131333	-0.713691	0.475418	0.773708	k__Bacteria	p__Firmicutes	c__Clostridia	o__Clostridiales	f__Ruminococcaceae	g__Ruminococcus	s__Ruminococcus sp. CAG:90
2.74225	-0.0145762	0.0204456	-0.712924	0.475893	0.773995	k__Bacteria	p__Firmicutes	c__Bacilli	o__Bacillales	f__Bacillales__na	g__Gemella	s__Gemella__uc
187.637	-0.0111854	0.0157163	-0.711708	0.476645	0.774735	k__Bacteria	p__Bacteroidetes	c__Bacteroidia	o__Bacteroidales	f__Prevotellaceae	g__Prevotella	s__Prevotella salivae
2.76183	0.0120669	0.0169834	0.710508	0.477389	0.775459	k__Bacteria	p__Actinobacteria	c__Actinobacteria	o__Actinomycetales	f__Actinomycetaceae	g__Actinomyces	s__Actinomyces sp. S6-Spd3
128.648	0.0190366	0.0268312	0.709495	0.478017	0.77562	k__Bacteria	p__Actinobacteria	c__Actinobacteria	o__Bifidobacteriales	f__Bifidobacteriaceae	g__Bifidobacterium	s__Bifidobacterium adolescentis CAG:119
1.65036	-0.0445073	0.0627406	-0.709386	0.478085	0.77562	k__Bacteria	p__Actinobacteria	c__Actinobacteria	o__Corynebacteriales	f__Nocardiaceae	g__Rhodococcus	s__Rhodococcus qingshengii
20.0987	-0.00375865	0.00530279	-0.708807	0.478445	0.775719	k__Bacteria	p__Firmicutes	c__Clostridia	o__Clostridiales	f__Lachnospiraceae	g__Butyrivibrio	s__Butyrivibrio sp. NC3005
48.4247	-0.00953288	0.013473	-0.707554	0.479222	0.776496	k__Bacteria	p__Bacteroidetes	c__Bacteroidia	o__Bacteroidales	f__Rikenellaceae	g__Rikenella	s__Rikenella microfusus
3.52181	0.00805139	0.0113891	0.70694	0.479604	0.776629	k__Bacteria	p__Firmicutes	c__Clostridia	o__Clostridiales	f__Peptococcaceae	g__Desulfonispora	s__Desulfonispora thiosulfatigenes
3.66917	0.0164556	0.023311	0.705918	0.480239	0.776643	k__Bacteria	p__Actinobacteria	c__Actinobacteria	o__Actinomycetales	f__Actinomycetaceae	g__Actinomyces	s__Actinomyces sp. oral taxon 170
71.3238	-0.00359474	0.00509588	-0.705421	0.480549	0.776643	k__Bacteria	p__Firmicutes	c__Clostridia	o__Clostridiales	f__Lachnospiraceae	g__Butyrivibrio	s__Butyrivibrio fibrisolvens
14.943	-0.00731416	0.0103705	-0.705286	0.480632	0.776643	k__Bacteria	p__Actinobacteria	c__Coriobacteriia	o__Coriobacteriales	f__Atopobiaceae	g__Olsenella	s__Olsenella uli
51.8693	0.0504385	0.0715435	0.705005	0.480807	0.776643	k__Bacteria	p__Firmicutes	c__Erysipelotrichia	o__Erysipelotrichales	f__Erysipelotrichaceae	g__Coprobacillus	s__Coprobacillus sp. CAG:605
292.932	-0.00364779	0.00519608	-0.702027	0.482662	0.77835	k__Bacteria	p__Firmicutes	c__Clostridia	o__Clostridiales	f__Lachnospiraceae	g__Marvinbryantia	s__Marvinbryantia formatexigens
3.34532	-0.010107	0.0143999	-0.701878	0.482755	0.77835	k__Bacteria	p__Proteobacteria	c__Deltaproteobacteria	o__Desulfovibrionales	f__Desulfovibrionaceae	g__Desulfovibrio	s__Desulfovibrio cuneatus
2.72934	-0.0158045	0.0225218	-0.70174	0.482841	0.77835	k__Bacteria	p__Actinobacteria	c__Actinobacteria	o__Bifidobacteriales	f__Bifidobacteriaceae	g__Bifidobacterium	s__Bifidobacterium crudilactis
476.266	0.0114862	0.0163764	0.701386	0.483062	0.77835	k__Bacteria	p__Firmicutes	c__Firmicutes__na	o__Firmicutes__na	f__Firmicutes__na	g__Firmicutes__na	s__Firmicutes bacterium CAG:145
76.8877	0.0724644	0.103437	0.700564	0.483575	0.778656	k__Bacteria	p__Firmicutes	c__Clostridia	o__Clostridiales	f__Clostridiaceae	g__Clostridium	s__Clostridium sp. 26_21
3.88117	0.0246949	0.0352785	0.7	0.483928	0.778656	k__Bacteria	p__Proteobacteria	c__Gammaproteobacteria	o__Pasteurellales	f__Pasteurellaceae	g__Haemophilus	s__Haemophilus sp. CCUG 60358
3.61587	-0.0172752	0.0247036	-0.699298	0.484366	0.778656	k__Bacteria	p__Bacteria__na	c__Bacteria__na	o__Bacteria__na	f__Bacteria__na	g__Bacteria__na	s__uncultured bacterium 5G4
8.18815	-0.00453495	0.00648626	-0.699163	0.48445	0.778656	k__Bacteria	p__Firmicutes	c__Clostridia	o__Clostridiales	f__Lachnospiraceae	g__Butyrivibrio	s__Butyrivibrio sp. AE3004
56.0162	0.00729133	0.0104372	0.698593	0.484806	0.778746	k__Bacteria	p__Firmicutes	c__Clostridia	o__Clostridiales	f__Christensenellaceae	g__Christensenella	s__Christensenella minuta
3.48783	0.00733156	0.0105151	0.697238	0.485654	0.779626	k__Bacteria	p__Firmicutes	c__Tissierellia	o__Tissierellales	f__Tissierellaceae	g__Tissierella	s__Tissierella praeacuta
0.492932	-0.0338192	0.0487165	-0.694204	0.487554		k__Bacteria	p__Proteobacteria	c__Gammaproteobacteria	o__Xanthomonadales	f__Xanthomonadaceae	g__Lysobacter	s__Lysobacter sp. A03
1.20845	0.0181289	0.0262336	0.691054	0.489531	0.785366	k__Bacteria	p__Tenericutes	c__Mollicutes	o__Mycoplasmatales	f__Mycoplasmataceae	g__Mycoplasma	s__Mycoplasma gallinarum
5.06408	0.00868125	0.0125997	0.689005	0.49082	0.786947	k__Bacteria	p__Firmicutes	c__Clostridia	o__Clostridiales	f__Clostridiaceae	g__Clostridium	s__Clostridium colicanis
292.156	-0.0195795	0.0284832	-0.687407	0.491826	0.787751	k__Bacteria	p__Bacteroidetes	c__Bacteroidia	o__Bacteroidales	f__Bacteroidaceae	g__Bacteroides	s__Bacteroides coprophilus CAG:333
1136.77	-0.00770846	0.0112257	-0.686678	0.492286	0.787751	k__Bacteria	p__Firmicutes	c__Clostridia	o__Clostridiales	f__Lachnospiraceae	g__Blautia	s__Blautia sp. KLE 1732
4.47227	0.00835856	0.0121758	0.686487	0.492406	0.787751	k__Bacteria	p__Firmicutes	c__Clostridia	o__Clostridiales	f__Clostridiaceae	g__Clostridium	s__Clostridium fallax
26.2425	0.015784	0.0229993	0.686285	0.492534	0.787751	k__Bacteria	p__Firmicutes	c__Bacilli	o__Lactobacillales	f__Streptococcaceae	g__Streptococcus	s__Streptococcus australis
0.504925	-0.0340307	0.0496967	-0.684767	0.493491		k__Bacteria	p__Proteobacteria	c__Gammaproteobacteria	o__Enterobacterales	f__Morganellaceae	g__Photorhabdus	s__Photorhabdus luminescens
5.81054	0.00849689	0.0124087	0.684752	0.493501	0.788812	k__Bacteria	p__Proteobacteria	c__Gammaproteobacteria	o__Gammaproteobacteria__na	f__Gammaproteobacteria__na	g__Gammaproteobacteria__na	s__methanotrophic bacterial endosymbiont of Bathymodiolus sp.
12.7835	0.00605678	0.00886614	0.683136	0.494521	0.789957	k__Bacteria	p__Firmicutes	c__Erysipelotrichia	o__Erysipelotrichales	f__Erysipelotrichaceae	g__Massiliomicrobiota	s__Massiliomicrobiota timonensis
31.6063	-0.0158009	0.0231761	-0.681776	0.495381	0.790759	k__Bacteria	p__Proteobacteria	c__Betaproteobacteria	o__Burkholderiales	f__Sutterellaceae	g__Sutterella	s__Sutterella sp. 54_7
2.88851	0.0118556	0.0173995	0.681379	0.495632	0.790759	k__Bacteria	p__Firmicutes	c__Tissierellia	o__Tissierellales	f__Peptoniphilaceae	g__Peptoniphilus	s__Peptoniphilus sp. KHD5
1.64713	0.0126925	0.018669	0.679872	0.496586	0.791297	k__Bacteria	p__Spirochaetes	c__Spirochaetia	o__Spirochaetales	f__Spirochaetaceae	g__Spirochaeta	s__Spirochaeta cellobiosiphila
850.074	-0.0157173	0.0231208	-0.679792	0.496636	0.791297	k__Bacteria	p__Actinobacteria	c__Actinobacteria	o__Bifidobacteriales	f__Bifidobacteriaceae	g__Bifidobacterium	s__Bifidobacterium bifidum
4.56585	-0.017979	0.0264629	-0.679404	0.496882	0.791297	k__Bacteria	p__Firmicutes	c__Bacilli	o__Lactobacillales	f__Streptococcaceae	g__Streptococcus	s__Streptococcus sp. HMSC072C09
7.29597	0.0101061	0.0148943	0.678523	0.49744	0.7917	k__Bacteria	p__Actinobacteria	c__Actinobacteria	o__Bifidobacteriales	f__Bifidobacteriaceae	g__Bifidobacterium	s__Bifidobacterium stellenboschense
2.05243	-0.0129107	0.0190885	-0.676363	0.49881	0.79328	k__Bacteria	p__Bacteroidetes	c__Bacteroidia	o__Bacteroidales	f__Bacteroidaceae	g__Bacteroides	s__Candidatus Bacteroides periocalifornicus
245.295	-0.00639218	0.00946112	-0.675626	0.499278	0.79328	k__Bacteria	p__Actinobacteria	c__Coriobacteriia	o__Coriobacteriia__uc	f__Coriobacteriia__uc	g__Coriobacteriia__uc	s__Coriobacteriia__uc
2.47878	0.0105713	0.01566	0.675052	0.499643	0.79328	k__Bacteria	p__Firmicutes	c__Bacilli	o__Bacillales	f__Paenibacillaceae	g__Paenibacillus	s__Paenibacillus polymyxa
24.2421	0.00371903	0.00550939	0.675035	0.499653	0.79328	k__Bacteria	p__Firmicutes	c__Clostridia	o__Clostridiales	f__Clostridiaceae	g__Clostridium	s__Clostridium sp. KNHs205
2091.27	0.00787803	0.0116849	0.674207	0.500179	0.793535	k__Bacteria	p__Firmicutes	c__Firmicutes__na	o__Firmicutes__na	f__Firmicutes__na	g__Firmicutes__na	s__Firmicutes bacterium CAG:114
3441.86	-0.00895316	0.0132871	-0.673821	0.500425	0.793535	k__Bacteria	p__Firmicutes	c__Clostridia	o__Clostridiales	f__Lachnospiraceae	g__Roseburia	s__Roseburia hominis
5.2041	-0.0109034	0.0161997	-0.673063	0.500907	0.79358	k__Bacteria	p__Bacteroidetes	c__Bacteroidia	o__Bacteroidales	f__Porphyromonadaceae	g__Porphyromonas	s__Porphyromonas levii
141.296	0.00792013	0.0117772	0.672498	0.501267	0.79358	k__Bacteria	p__Firmicutes	c__Clostridia	o__Clostridiales	f__Clostridiales Family XIII. Incertae Sedis	g__Emergencia	s__Emergencia timonensis
9.0813	0.00592153	0.00880737	0.672337	0.501369	0.79358	k__Bacteria	p__Spirochaetes	c__Spirochaetia	o__Spirochaetales	f__Spirochaetaceae	g__Treponema	s__Treponema brennaborense
13.3654	0.0109166	0.0162661	0.671123	0.502142	0.793597	k__Bacteria	p__Actinobacteria	c__Actinobacteria	o__Actinomycetales	f__Actinomycetaceae	g__Actinomyces	s__Actinomyces sp. ICM39
1.03973	0.0172979	0.0257753	0.671103	0.502155	0.793597	k__Bacteria	p__Lentisphaerae	c__Lentisphaerae__na	o__Lentisphaerae__na	f__Lentisphaerae__na	g__Lentisphaerae__na	s__Lentisphaerae bacterium RIFOXYA12_FULL_48_11
17.2484	-0.0093081	0.0138744	-0.670881	0.502296	0.793597	k__Bacteria	p__Actinobacteria	c__Actinobacteria	o__Actinomycetales	f__Actinomycetaceae	g__Actinomyces	s__Actinomyces oris
18.9585	-0.0119823	0.0179039	-0.669257	0.503331	0.79475	k__Bacteria	p__Actinobacteria	c__Coriobacteriia	o__Coriobacteriales	f__Coriobacteriaceae	g__Collinsella	s__uncultured Collinsella sp.
6.93114	-0.0120965	0.0180877	-0.668772	0.503641	0.794756	k__Bacteria	p__Actinobacteria	c__Actinobacteria	o__Bifidobacteriales	f__Bifidobacteriaceae	g__Parascardovia	s__Parascardovia denticolens
1690.11	0.0547309	0.0821686	0.66608	0.50536	0.796665	k__Bacteria	p__Firmicutes	c__Clostridia	o__Clostridiales	f__Ruminococcaceae	g__Faecalibacterium	s__Faecalibacterium sp. CAG:74
5.36415	0.0106998	0.016072	0.665742	0.505576	0.796665	k__Bacteria	p__Actinobacteria	c__Actinobacteria	o__Micrococcales	f__Promicromonosporaceae	g__Isoptericola	s__Isoptericola variabilis
66.1045	-0.00627083	0.00942361	-0.665438	0.50577	0.796665	k__Bacteria	p__Firmicutes	c__Bacilli	o__Lactobacillales	f__Streptococcaceae	g__Streptococcus	s__Streptococcus agalactiae
6770.57	-0.0203553	0.0306766	-0.663543	0.506983	0.798091	k__Bacteria	p__Bacteroidetes	c__Bacteroidia	o__Bacteroidales	f__Prevotellaceae	g__Prevotella	s__Prevotella sp. CAG:732
11.7415	-0.0104175	0.0157243	-0.662508	0.507645	0.79865	k__Bacteria	p__Actinobacteria	c__Actinobacteria	o__Bifidobacteriales	f__Bifidobacteriaceae	g__Bifidobacterium	s__Bifidobacterium reuteri
3.47668	-0.00859108	0.0129825	-0.661745	0.508135	0.798937	k__Bacteria	p__Firmicutes	c__Clostridia	o__Clostridiales	f__Clostridiaceae	g__Clostridium	s__Clostridium frigidicarnis
14.3147	0.00478834	0.00726348	0.659236	0.509744	0.800983	k__Bacteria	p__Firmicutes	c__Bacilli	o__Bacillales	f__Paenibacillaceae	g__Aneurinibacillus	s__Aneurinibacillus migulanus
2.60259	0.00806301	0.012273	0.656971	0.511199	0.802784	k__Bacteria	p__Firmicutes	c__Bacilli	o__Bacillales	f__Paenibacillaceae	g__Paenibacillaceae__uc	s__Paenibacillaceae__uc
1545.75	-0.00584722	0.00891383	-0.655971	0.511843	0.803308	k__Bacteria	p__Firmicutes	c__Clostridia	o__Clostridiales	f__Ruminococcaceae	g__Ruminococcus	s__Ruminococcus sp. JC304
66.736	0.0685801	0.104649	0.655334	0.512253	0.803382	k__Bacteria	p__Firmicutes	c__Clostridia	o__Clostridiales	f__Clostridiaceae	g__Clostridium	s__Clostridium sp. CAG:1193
90.3237	-0.0113586	0.0173457	-0.65484	0.512571	0.803382	k__Bacteria	p__Actinobacteria	c__Coriobacteriia	o__Coriobacteriales	f__Coriobacteriaceae	g__Collinsella	s__Collinsella bouchesdurhonensis
4.94385	-0.0175978	0.0268891	-0.654458	0.512817	0.803382	k__Bacteria	p__Firmicutes	c__Bacilli	o__Lactobacillales	f__Streptococcaceae	g__Streptococcus	s__Streptococcus sp. HMSC065E03
242.382	0.0801857	0.122729	0.653353	0.513528	0.803554	k__Bacteria	p__Firmicutes	c__Clostridia	o__Clostridiales	f__Clostridiaceae	g__Clostridium	s__Clostridium sp. CAG:465
91.5105	0.00972166	0.0148802	0.653328	0.513545	0.803554	k__Bacteria	p__Firmicutes	c__Clostridia	o__Clostridiales	f__Clostridiales__na	g__Clostridiales__na	s__Clostridiales bacterium VE202-13
6.59247	-0.0139292	0.0213684	-0.651859	0.514492	0.804551	k__Bacteria	p__Actinobacteria	c__Actinobacteria	o__Actinomycetales	f__Actinomycetaceae	g__Actinomyces	s__Actinomyces sp. oral taxon 448
7.24605	-0.0073842	0.0113523	-0.650458	0.515396	0.805085	k__Bacteria	p__Firmicutes	c__Clostridia	o__Clostridiales	f__Lachnospiraceae	g__Butyrivibrio	s__Butyrivibrio sp. ob235
53.1709	0.0181083	0.027843	0.650371	0.515453	0.805085	k__Bacteria	p__Firmicutes	c__Clostridia	o__Clostridiales	f__Clostridiaceae	g__Clostridium	s__Clostridium sp. CAG:356
6992.19	0.0127851	0.0196746	0.649827	0.515804	0.80515	k__Bacteria	p__Firmicutes	c__Firmicutes__na	o__Firmicutes__na	f__Firmicutes__na	g__Firmicutes__na	s__Firmicutes bacterium CAG:124
651.237	0.0819097	0.126763	0.646163	0.518174	0.807971	k__Bacteria	p__Firmicutes	c__Clostridia	o__Clostridiales	f__Clostridiaceae	g__Clostridium	s__Clostridium sp. CAG:349
8.16505	-0.0170448	0.0263858	-0.645983	0.518291	0.807971	k__Bacteria	p__Firmicutes	c__Bacilli	o__Lactobacillales	f__Streptococcaceae	g__Streptococcus	s__Streptococcus sp. I-P16
2.16261	-0.00867017	0.0134298	-0.645592	0.518544	0.807971	k__Bacteria	p__Proteobacteria	c__Deltaproteobacteria	o__Deltaproteobacteria__na	f__Deltaproteobacteria__na	g__Deltaproteobacteria__na	s__delta proteobacterium ML8_F1
25.147	-0.0143512	0.0222652	-0.644556	0.519215	0.80829	k__Bacteria	p__Bacteroidetes	c__Bacteroidia	o__Bacteroidales	f__Bacteroidaceae	g__Bacteroides	s__Bacteroides sp. CAG:1060
4.35633	-0.0166299	0.0258102	-0.644316	0.51937	0.80829	k__Bacteria	p__Firmicutes	c__Tissierellia	o__Tissierellia__na	f__Tissierellia__na	g__Tissierellia__na	s__Tissierellia bacterium S5-A11
399.892	0.0535453	0.0832013	0.643563	0.519859	0.808565	k__Bacteria	p__Firmicutes	c__Clostridia	o__Clostridiales	f__Clostridiaceae	g__Clostridium	s__Clostridium sp. 26_22
0.841433	-0.0170574	0.0265784	-0.641778	0.521017	0.809743	k__Bacteria	p__Firmicutes	c__Tissierellia	o__Tissierellales	f__Peptoniphilaceae	g__Parvimonas	s__Parvimonas sp. oral taxon 110
3.45718	-0.00755086	0.0117718	-0.641437	0.521239	0.809743	k__Bacteria	p__Firmicutes	c__Clostridia	o__Thermoanaerobacterales	f__Thermoanaerobacterales Family III. Incertae Sedis	g__Syntrophaceticus	s__Syntrophaceticus schinkii
1.83986	-0.0149158	0.0233012	-0.640128	0.522089	0.810579	k__Bacteria	p__Fibrobacteres	c__Fibrobacteria	o__Fibrobacterales	f__Fibrobacteraceae	g__Fibrobacter	s__Fibrobacter sp. UWH5
9.98323	0.00939475	0.0147131	0.638531	0.523128	0.811707	k__Bacteria	p__Proteobacteria	c__Deltaproteobacteria	o__Desulfovibrionales	f__Desulfovibrionaceae	g__Desulfovibrio	s__Desulfovibrio vulgaris
1.04011	0.0146376	0.0229504	0.637791	0.52361	0.811757	k__Bacteria	p__Bacteroidetes	c__Bacteroidia	o__Bacteroidales	f__Porphyromonadaceae	g__Porphyromonas	s__Porphyromonas sp. HMSC077F02
19.6508	-0.00321554	0.00504446	-0.63744	0.523838	0.811757	k__Bacteria	p__Firmicutes	c__Clostridia	o__Clostridiales	f__Lachnospiraceae	g__Lachnospiraceae__na	s__Lachnospiraceae bacterium NC2004
1683.87	0.0169666	0.0266454	0.636754	0.524285	0.811757	k__Bacteria	p__Firmicutes	c__Clostridia	o__Clostridiales	f__Eubacteriaceae	g__Eubacterium	s__Eubacterium sp. CAG:248
37.3755	-0.00428724	0.00673706	-0.636367	0.524537	0.811757	k__Bacteria	p__Firmicutes	c__Clostridia	o__Clostridiales	f__Lachnospiraceae	g__Oribacterium	s__Oribacterium__uc
2.67003	-0.00920295	0.0144681	-0.636084	0.524722	0.811757	k__Bacteria	p__Firmicutes	c__Clostridia	o__Clostridiales	f__Clostridiaceae	g__Clostridium	s__Clostridium sartagoforme
2.48089	-0.00794821	0.0125123	-0.63523	0.525278	0.812135	k__Bacteria	p__Spirochaetes	c__Spirochaetia	o__Spirochaetales	f__Spirochaetaceae	g__Treponema	s__Treponema sp. JC4
0.990958	-0.033451	0.0527314	-0.634366	0.525842	0.812167	k__Bacteria	p__Proteobacteria	c__Gammaproteobacteria	o__Enterobacterales	f__Enterobacteriaceae	g__Enterobacter	s__Enterobacter sp. FY-07
12.3539	0.00386165	0.00608863	0.63424	0.525924	0.812167	k__Bacteria	p__Firmicutes	c__Clostridia	o__Clostridiales	f__Lachnospiraceae	g__Butyrivibrio	s__Butyrivibrio sp. INlla21
9.94442	0.00684285	0.0108025	0.633451	0.526439	0.812479	k__Bacteria	p__Chloroflexi	c__Dehalococcoidia	o__Dehalococcoidales	f__Dehalococcoidaceae	g__Dehalococcoides	s__Dehalococcoides mccartyi
76.4744	-0.00317839	0.00502347	-0.632707	0.526925	0.812746	k__Bacteria	p__Firmicutes	c__Clostridia	o__Clostridiales	f__Clostridiales__na	g__Clostridiales__na	s__Clostridiales bacterium CHKCI001
0.807057	0.0235519	0.037262	0.632062	0.527346	0.812902	k__Bacteria	p__Firmicutes	c__Bacilli	o__Lactobacillales	f__Leuconostocaceae	g__Fructobacillus	s__Fructobacillus fructosus
1.66577	-0.0264817	0.0419282	-0.631596	0.527651	0.812902	k__Bacteria	p__Firmicutes	c__Bacilli	o__Lactobacillales	f__Lactobacillaceae	g__Lactobacillus	s__Lactobacillus ultunensis
428.473	0.080343	0.127332	0.630972	0.528059	0.813048	k__Bacteria	p__Firmicutes	c__Clostridia	o__Clostridiales	f__Clostridiaceae	g__Clostridium	s__Clostridium sp. CAG:567
11.2881	0.00434152	0.00689436	0.62972	0.528878	0.813827	k__Bacteria	p__Firmicutes	c__Bacilli	o__Bacillales	f__Bacillaceae	g__Anaerobacillus	s__Anaerobacillus alkalidiazotrophicus
289.466	-0.0587083	0.0933119	-0.629163	0.529243	0.813877	k__Bacteria	p__Proteobacteria	c__Betaproteobacteria	o__Burkholderiales	f__Sutterellaceae	g__Sutterella	s__Sutterella sp. KLE1602
2.5731	-0.00848446	0.013495	-0.628713	0.529537	0.813877	k__Bacteria	p__Firmicutes	c__Negativicutes	o__Selenomonadales	f__Selenomonadaceae	g__Selenomonas	s__Selenomonas sp. oral taxon 920
71.3442	-0.00330634	0.00526896	-0.627513	0.530323	0.814311	k__Bacteria	p__Firmicutes	c__Clostridia	o__Clostridiales	f__Lachnospiraceae	g__Lachnospiraceae__na	s__Lachnospiraceae bacterium COE1
10.7512	0.00535186	0.00853123	0.627326	0.530446	0.814311	k__Bacteria	p__Firmicutes	c__Clostridia	o__Clostridiales	f__Lachnospiraceae	g__Pseudobutyrivibrio	s__Pseudobutyrivibrio sp. OR37
0.854676	-0.0175839	0.0280703	-0.626422	0.531038	0.814608	k__Bacteria	p__Fusobacteria	c__Fusobacteriia	o__Fusobacteriales	f__Leptotrichiaceae	g__Leptotrichia	s__Leptotrichia shahii
316.609	0.0622254	0.0993897	0.626075	0.531266	0.814608	k__Bacteria	p__Firmicutes	c__Clostridia	o__Clostridiales	f__Clostridiaceae	g__Clostridium	s__Clostridium sp. CAG:780
2.2607	0.0134119	0.0214534	0.625164	0.531864	0.814729	k__Bacteria	p__Bacteria__na	c__Bacteria__na	o__Bacteria__na	f__Bacteria__na	g__Bacteria__na	s__uncultured bacterium EB2
67.7177	-0.00511844	0.00819109	-0.624878	0.532051	0.814729	k__Bacteria	p__Firmicutes	c__Clostridia	o__Clostridiales	f__Lachnospiraceae	g__Anaerostipes	s__Anaerostipes caccae
2.42241	-0.0273691	0.0438241	-0.624521	0.532286	0.814729	k__Bacteria	p__Proteobacteria	c__Gammaproteobacteria	o__Enterobacterales	f__Enterobacteriaceae	g__Citrobacter	s__Citrobacter youngae
1.04453	-0.0181108	0.0291316	-0.62169	0.534146	0.817096	k__Bacteria	p__Firmicutes	c__Bacilli	o__Lactobacillales	f__Lactobacillaceae	g__Lactobacillus	s__Lactobacillus hordei
240.412	0.045497	0.0732976	0.620716	0.534786	0.817445	k__Bacteria	p__Firmicutes	c__Clostridia	o__Clostridiales	f__Ruminococcaceae	g__Ruminococcus	s__Ruminococcus sp. CAG:353
8.05777	0.00525762	0.00847701	0.620221	0.535112	0.817445	k__Bacteria	p__Firmicutes	c__Clostridia	o__Clostridiales	f__Lachnospiraceae	g__Butyrivibrio	s__Butyrivibrio sp. WCD3002
160.826	-0.00615259	0.00992499	-0.619909	0.535318	0.817445	k__Bacteria	p__Firmicutes	c__Clostridia	o__Clostridiales	f__Eubacteriaceae	g__Eubacteriaceae__uc	s__Eubacteriaceae__uc
5.90235	-0.00542047	0.0087511	-0.619404	0.53565	0.817472	k__Bacteria	p__Firmicutes	c__Bacilli	o__Lactobacillales	f__Carnobacteriaceae	g__Trichococcus	s__Trichococcus__uc
24.0999	-0.00716802	0.0115866	-0.618648	0.536148	0.817752	k__Bacteria	p__Firmicutes	c__Clostridia	o__Clostridiales	f__Clostridiaceae	g__Clostridium	s__Clostridium sp. C105KSO14
9.16096	-0.00533701	0.00863387	-0.618148	0.536478	0.817775	k__Bacteria	p__Firmicutes	c__Clostridia	o__Clostridiales	f__Lachnospiraceae	g__Pseudobutyrivibrio	s__Pseudobutyrivibrio xylanivorans
5.14037	-0.00580627	0.00941517	-0.616694	0.537437	0.818437	k__Bacteria	p__Firmicutes	c__Clostridia	o__Clostridiales	f__Eubacteriaceae	g__Acetobacterium	s__Acetobacterium woodii
2022.38	0.0166987	0.0270848	0.616534	0.537542	0.818437	k__Bacteria	p__Proteobacteria	c__Deltaproteobacteria	o__Desulfovibrionales	f__Desulfovibrionaceae	g__Desulfovibrio	s__Desulfovibrio piger
1112.87	0.0137755	0.0224118	0.614654	0.538783	0.8197	k__Bacteria	p__Firmicutes	c__Clostridia	o__Clostridiales	f__Clostridiaceae	g__Clostridium	s__Clostridium sp. CAG:75
96.1939	0.0283274	0.0461117	0.614322	0.539003	0.8197	k__Bacteria	p__Firmicutes	c__Erysipelotrichia	o__Erysipelotrichales	f__Erysipelotrichaceae	g__Coprobacillus	s__Coprobacillus sp. CAG:235_29_27
0.664165	0.0209792	0.0341769	0.613843	0.539319		k__Bacteria	p__Proteobacteria	c__Gammaproteobacteria	o__Pasteurellales	f__Pasteurellaceae	g__Haemophilus	s__Haemophilus parahaemolyticus
0.735878	-0.0226247	0.0369287	-0.612658	0.540103		k__Bacteria	p__Proteobacteria	c__Betaproteobacteria	o__Burkholderiales	f__Comamonadaceae	g__Pelomonas	s__Pelomonas sp. Root1237
22.8764	0.0119882	0.0196138	0.611213	0.541058	0.821893	k__Bacteria	p__Bacteroidetes	c__Bacteroidia	o__Bacteroidales	f__Bacteroidales__na	g__Bacteroidales__na	s__Bacteroidales bacterium WCE2008
2.34892	0.0234056	0.0383071	0.610999	0.5412	0.821893	k__Bacteria	p__Proteobacteria	c__Gammaproteobacteria	o__Pasteurellales	f__Pasteurellaceae	g__Aggregatibacter	s__Aggregatibacter segnis
113.669	0.0850979	0.139343	0.610708	0.541393	0.821893	k__Bacteria	p__Proteobacteria	c__Gammaproteobacteria	o__Pseudomonadales	f__Moraxellaceae	g__Acinetobacter	s__Acinetobacter sp. CAG:196_36_41
665.986	0.0754118	0.123612	0.610069	0.541816	0.822055	k__Bacteria	p__Firmicutes	c__Clostridia	o__Clostridiales	f__Clostridiaceae	g__Clostridium	s__Clostridium sp. CAG:452
1.11317	0.0120612	0.0198134	0.608741	0.542696	0.82291	k__Bacteria	p__Fusobacteria	c__Fusobacteriia	o__Fusobacteriales	f__Leptotrichiaceae	g__Leptotrichia	s__Leptotrichia sp. oral taxon 215
1.10886	-0.0139925	0.0230186	-0.607881	0.543267	0.823294	k__Bacteria	p__Bacteroidetes	c__Flavobacteriia	o__Flavobacteriales	f__Flavobacteriaceae	g__Capnocytophaga	s__Capnocytophaga sp. oral taxon 863
331.577	0.0606071	0.100184	0.604956	0.545209	0.825756	k__Bacteria	p__Firmicutes	c__Clostridia	o__Clostridiales	f__Clostridiaceae	g__Clostridium	s__Clostridium sp. CAG:440
6.23572	-0.0107612	0.0178462	-0.603	0.546509	0.827243	k__Bacteria	p__Firmicutes	c__Bacilli	o__Lactobacillales	f__Streptococcaceae	g__Streptococcus	s__Streptococcus dysgalactiae
3.13787	0.00654235	0.0108979	0.600331	0.548286	0.829228	k__Bacteria	p__Firmicutes	c__Clostridia	o__Clostridiales	f__Lachnospiraceae	g__Butyrivibrio	s__Butyrivibrio sp. AE2015
29.9376	-0.00703188	0.0117184	-0.600072	0.548458	0.829228	k__Bacteria	p__Firmicutes	c__Erysipelotrichia	o__Erysipelotrichales	f__Erysipelotrichaceae	g__Allobaculum	s__Allobaculum stercoricanis
6.41841	0.00706031	0.0117753	0.599585	0.548783	0.829236	k__Bacteria	p__Firmicutes	c__Tissierellia	o__Tissierellia__na	f__Tissierellia__na	g__Kallipyga	s__Kallipyga gabonensis
442.579	0.0146314	0.024449	0.598445	0.549543	0.829903	k__Bacteria	p__Firmicutes	c__Erysipelotrichia	o__Erysipelotrichales	f__Erysipelotrichaceae	g__Turicibacter	s__Turicibacter__uc
899.124	-0.0101866	0.017062	-0.597032	0.550486	0.830844	k__Bacteria	p__Firmicutes	c__Erysipelotrichia	o__Erysipelotrichales	f__Erysipelotrichaceae	g__Erysipelotrichaceae__uc	s__Erysipelotrichaceae__uc
241.594	0.0139278	0.0234081	0.595	0.551844	0.83241	k__Bacteria	p__Firmicutes	c__Clostridia	o__Clostridiales	f__Clostridiaceae	g__Clostridium	s__Clostridium sp. 27_14
1.35842	-0.0119527	0.0201639	-0.592781	0.553328	0.834164	k__Bacteria	p__Bacteria__na	c__Bacteria__na	o__Bacteria__na	f__Bacteria__na	g__Bacteria__na	s__uncultured bacterium 31i10b
3.71877	-0.00779796	0.0132264	-0.589576	0.555475	0.835934	k__Bacteria	p__Spirochaetes	c__Spirochaetia	o__Spirochaetales	f__Spirochaetales__na	g__Spirochaetales__na	s__uncultured Spirochaetales bacterium HF0500_06B09
1.58124	-0.0198086	0.0336021	-0.589506	0.555522	0.835934	k__Bacteria	p__Firmicutes	c__Bacilli	o__Lactobacillales	f__Leuconostocaceae	g__Weissella	s__Weissella hellenica
5.58344	-0.0138341	0.0234873	-0.589003	0.555859	0.835934	k__Bacteria	p__Firmicutes	c__Bacilli	o__Lactobacillales	f__Streptococcaceae	g__Streptococcus	s__Streptococcus sp. HMSC072G04
0.556912	-0.035738	0.0607387	-0.58839	0.556271		k__Bacteria	p__Firmicutes	c__Bacilli	o__Lactobacillales	f__Streptococcaceae	g__Streptococcus	s__Streptococcus sp. CCH8-G7
1.16822	0.0164614	0.0279922	0.588072	0.556484	0.835934	k__Bacteria	p__Bacteria__na	c__Bacteria__na	o__Bacteria__na	f__Bacteria__na	g__Bacteria__na	s__uncultured bacterium Contig1625
24460.6	0.0117484	0.0199858	0.587839	0.556641	0.835934	k__Bacteria	p__Actinobacteria	c__Actinobacteria	o__Bifidobacteriales	f__Bifidobacteriaceae	g__Bifidobacterium	s__Bifidobacterium__uc
12.3815	0.0180823	0.0307725	0.587613	0.556792	0.835934	k__Bacteria	p__Firmicutes	c__Bacilli	o__Lactobacillales	f__Lactobacillaceae	g__Lactobacillaceae__uc	s__Lactobacillaceae__uc
2301.44	0.0107678	0.0183507	0.586778	0.557353	0.835934	k__Bacteria	p__Firmicutes	c__Clostridia	o__Clostridiales	f__Oscillospiraceae	g__Oscillibacter	s__Oscillibacter sp. CAG:241
4.27906	-0.00743423	0.0126794	-0.586323	0.557659	0.835934	k__Bacteria	p__Firmicutes	c__Negativicutes	o__Selenomonadales	f__Sporomusaceae	g__Dendrosporobacter	s__Dendrosporobacter quercicolus
151.509	-0.0163631	0.0279244	-0.585979	0.55789	0.835934	k__Bacteria	p__Synergistetes	c__Synergistia	o__Synergistales	f__Synergistaceae	g__Cloacibacillus	s__Cloacibacillus porcorum
79.9655	-0.0031529	0.00538179	-0.585846	0.557979	0.835934	k__Bacteria	p__Firmicutes	c__Clostridia	o__Clostridiales	f__Lachnospiraceae	g__Lachnospiraceae__na	s__Lachnospiraceae bacterium 10-1
25.4456	-0.0164442	0.028098	-0.585246	0.558383	0.835934	k__Bacteria	p__Bacteroidetes	c__Bacteroidia	o__Bacteroidales	f__Porphyromonadaceae	g__Petrimonas	s__Petrimonas mucosa
2.36427	0.0249225	0.0426243	0.584701	0.558749	0.835934	k__Bacteria	p__Proteobacteria	c__Gammaproteobacteria	o__Enterobacterales	f__Enterobacteriaceae	g__Citrobacter	s__Citrobacter amalonaticus
9.05211	0.00748835	0.0128097	0.584585	0.558827	0.835934	k__Bacteria	p__Firmicutes	c__Clostridia	o__Thermoanaerobacterales	f__Thermoanaerobacterales Family IV. Incertae Sedis	g__Mahella	s__Mahella australiensis
57.8559	-0.0136399	0.0233432	-0.584321	0.559004	0.835934	k__Bacteria	p__Synergistetes	c__Synergistia	o__Synergistales	f__Synergistaceae	g__Synergistaceae__uc	s__Synergistaceae__uc
3.93117	0.0184551	0.0316798	0.582551	0.560195	0.836755	k__Bacteria	p__Proteobacteria	c__Gammaproteobacteria	o__Pasteurellales	f__Pasteurellaceae	g__Haemophilus	s__Haemophilus sp. HMSC061E01
1.31443	-0.0230074	0.0394944	-0.582548	0.560198	0.836755	k__Bacteria	p__Proteobacteria	c__Gammaproteobacteria	o__Enterobacterales	f__Enterobacteriaceae	g__Salmonella	s__Salmonella bongori
329.919	-0.0099935	0.0171995	-0.581034	0.561218	0.837797	k__Bacteria	p__Bacteroidetes	c__Bacteroidia	o__Bacteroidales	f__Bacteroidaceae	g__Bacteroides	s__Bacteroides clarus
0.676621	-0.0463371	0.0798975	-0.579958	0.561943		k__Bacteria	p__Bacteroidetes	c__Bacteroidia	o__Bacteroidales	f__Prevotellaceae	g__Prevotella	s__Prevotella sp. Sc00026
1387.19	0.0147622	0.0255084	0.578717	0.56278	0.839643	k__Bacteria	p__Firmicutes	c__Firmicutes__na	o__Firmicutes__na	f__Firmicutes__na	g__Firmicutes__na	s__Firmicutes bacterium CAG:341
3.37088	0.00813617	0.0140875	0.577544	0.563572	0.839643	k__Bacteria	p__Firmicutes	c__Tissierellia	o__Tissierellia__na	f__Tissierellia__na	g__Tissierellia__na	s__[Clostridium] ultunense
257.356	-0.00651027	0.0112939	-0.576444	0.564315	0.839643	k__Bacteria	p__Actinobacteria	c__Actinobacteria	o__Actinobacteria__uc	f__Actinobacteria__uc	g__Actinobacteria__uc	s__Actinobacteria__uc2
0.986992	-0.0390141	0.0676901	-0.576363	0.56437	0.839643	k__Bacteria	p__Proteobacteria	c__Gammaproteobacteria	o__Enterobacterales	f__Enterobacteriaceae	g__Klebsiella	s__Klebsiella variicola CAG:634
28.7477	0.00353898	0.00614293	0.576106	0.564543	0.839643	k__Bacteria	p__Firmicutes	c__Clostridia	o__Clostridiales	f__Lachnospiraceae	g__Lachnospiraceae__na	s__Lachnospiraceae bacterium RM5
37.9962	0.00333896	0.00580057	0.575626	0.564868	0.839643	k__Bacteria	p__Firmicutes	c__Clostridia	o__Clostridiales	f__Lachnospiraceae	g__Lachnospiraceae__na	s__Lachnospiraceae bacterium XBB1006
1.27406	-0.0123312	0.0214578	-0.574671	0.565514	0.839643	k__Bacteria	p__Firmicutes	c__Erysipelotrichia	o__Erysipelotrichales	f__Erysipelotrichaceae	g__Ileibacterium	s__Ileibacterium valens
5727.75	0.0135631	0.0236273	0.574044	0.565938	0.839643	k__Bacteria	p__Actinobacteria	c__Actinobacteria	o__Bifidobacteriales	f__Bifidobacteriaceae	g__Bifidobacterium	s__Bifidobacterium adolescentis
24.7808	-0.0113318	0.0197512	-0.57373	0.566151	0.839643	k__Bacteria	p__Firmicutes	c__Erysipelotrichia	o__Erysipelotrichales	f__Erysipelotrichaceae	g__Coprobacillus	s__Coprobacillus sp. D7
1.23991	-0.0153832	0.0268686	-0.572535	0.56696	0.839643	k__Bacteria	p__Fusobacteria	c__Fusobacteriia	o__Fusobacteriales	f__Leptotrichiaceae	g__Sneathia	s__Sneathia sanguinegens
21.8977	0.0147451	0.0257676	0.572235	0.567163	0.839643	k__Bacteria	p__Firmicutes	c__Bacilli	o__Lactobacillales	f__Lactobacillaceae	g__Lactobacillus	s__Lactobacillus ruminis CAG:367
27.0586	0.00280868	0.00490951	0.572089	0.567261	0.839643	k__Bacteria	p__Firmicutes	c__Clostridia	o__Clostridiales	f__Lachnospiraceae	g__Anaerocolumna	s__Anaerocolumna jejuensis
151.673	0.00682949	0.0119454	0.571725	0.567508	0.839643	k__Bacteria	p__Firmicutes	c__Clostridia	o__Clostridiales	f__Ruminococcaceae	g__Anaerotruncus	s__Anaerotruncus rubiinfantis
177.266	0.0872486	0.152664	0.571506	0.567656	0.839643	k__Bacteria	p__Tenericutes	c__Mollicutes	o__Mycoplasmatales	f__Mycoplasmataceae	g__Mycoplasma	s__Mycoplasma sp. CAG:611
2.13422	-0.0118924	0.0208137	-0.571375	0.567746	0.839643	k__Bacteria	p__Firmicutes	c__Bacilli	o__Lactobacillales	f__Streptococcaceae	g__Streptococcus	s__Streptococcus sp. DD10
3.30374	0.00683045	0.0119551	0.57134	0.567769	0.839643	k__Bacteria	p__Firmicutes	c__Clostridia	o__Clostridiales	f__Peptococcaceae	g__Desulfosporosinus	s__Desulfosporosinus orientis
39.0023	0.0612821	0.107309	0.571079	0.567946	0.839643	k__Bacteria	p__Tenericutes	c__Mollicutes	o__Mycoplasmatales	f__Mycoplasmataceae	g__Mycoplasma	s__Mycoplasma__uc
162.339	0.00563816	0.00988644	0.570292	0.568479	0.839953	k__Bacteria	p__Firmicutes	c__Clostridia	o__Clostridiales	f__Lachnospiraceae	g__Tyzzerella	s__[Clostridium] lactatifermentans
6.36267	0.00515002	0.00904474	0.569394	0.569089	0.840376	k__Bacteria	p__Firmicutes	c__Clostridia	o__Clostridiales	f__Clostridiaceae	g__Clostridium	s__Clostridium tyrobutyricum
3.24642	-0.0126637	0.0223288	-0.567144	0.570616	0.842153	k__Bacteria	p__Proteobacteria	c__Betaproteobacteria	o__Burkholderiales	f__Comamonadaceae	g__Pelomonas	s__Pelomonas__uc
2.54885	0.00826634	0.0146024	0.566094	0.57133	0.842572	k__Bacteria	p__Firmicutes	c__Clostridia	o__Clostridiales	f__Lachnospiraceae	g__Pseudobutyrivibrio	s__Pseudobutyrivibrio sp. LB2011
3635.49	-0.00997793	0.0176493	-0.565344	0.57184	0.842572	k__Bacteria	p__Bacteroidetes	c__Bacteroidia	o__Bacteroidales	f__Rikenellaceae	g__Alistipes	s__Alistipes obesi
1.1212	-0.0175255	0.0310024	-0.565296	0.571873	0.842572	k__Bacteria	p__Firmicutes	c__Clostridia	o__Clostridiales	f__Lachnospiraceae	g__Lachnospiraceae__na	s__Lachnospiraceae bacterium VE202-23
77.1828	0.0134675	0.0239675	0.561907	0.57418	0.845492	k__Bacteria	p__Actinobacteria	c__Actinobacteria	o__Bifidobacteriales	f__Bifidobacteriaceae	g__Bifidobacterium	s__Bifidobacterium longum CAG:69
2.59895	-0.0114807	0.020467	-0.560936	0.574841	0.845987	k__Bacteria	p__Fibrobacteres	c__Fibrobacteria	o__Fibrobacterales	f__Fibrobacteraceae	g__Fibrobacter	s__Fibrobacter sp. UWOS
430.317	0.00587387	0.0104848	0.560228	0.575324	0.846218	k__Bacteria	p__Firmicutes	c__Clostridia	o__Clostridiales	f__Clostridiales__na	g__Clostridiales__na	s__[Bacteroides] pectinophilus
3.14476	-0.00642637	0.0114809	-0.559745	0.575653	0.846223	k__Bacteria	p__Fusobacteria	c__Fusobacteriia	o__Fusobacteriales	f__Leptotrichiaceae	g__Leptotrichia	s__Leptotrichia__uc
0.28553	0.0389285	0.0695893	0.559404	0.575886		k__Bacteria	p__Bacteria__na	c__Bacteria__na	o__Bacteria__na	f__Bacteria__na	g__Bacteria__na	s__uncultured bacterium contig00010(2014)
7.49355	-0.00771952	0.0138215	-0.558516	0.576492	0.846436	k__Bacteria	p__Synergistetes	c__Synergistia	o__Synergistales	f__Synergistaceae	g__Pyramidobacter	s__Pyramidobacter__uc
154.623	-0.0313151	0.0560725	-0.558475	0.57652	0.846436	k__Bacteria	p__Bacteroidetes	c__Bacteroidia	o__Bacteroidales	f__Bacteroidaceae	g__Bacteroides	s__Bacteroides sp. CAG:661
209.781	0.0680389	0.121911	0.558101	0.576775	0.846436	k__Bacteria	p__Firmicutes	c__Bacilli	o__Bacillales	f__Staphylococcaceae	g__Staphylococcus	s__Staphylococcus sp. CAG:324
8.98077	0.00491441	0.00882195	0.557066	0.577482	0.846995	k__Bacteria	p__Firmicutes	c__Clostridia	o__Clostridiales	f__Peptococcaceae	g__Desulfitobacterium	s__Desulfitobacterium__uc
140.135	0.0121963	0.0220009	0.554354	0.579337	0.848961	k__Bacteria	p__Actinobacteria	c__Coriobacteriia	o__Coriobacteriales	f__Atopobiaceae	g__Olsenella	s__Olsenella sp. Marseille-P2300
51.0157	0.00398329	0.00720485	0.552862	0.580358	0.848961	k__Bacteria	p__Firmicutes	c__Clostridia	o__Clostridiales	f__Lachnospiraceae	g__Lachnospira	s__Lachnospira multipara
12.7942	0.0041013	0.00742201	0.552586	0.580547	0.848961	k__Bacteria	p__Firmicutes	c__Clostridia	o__Clostridiales	f__Lachnospiraceae	g__Oribacterium	s__Oribacterium sp. C9
1920.6	0.00513986	0.00930618	0.552306	0.580739	0.848961	k__Bacteria	p__Firmicutes	c__Clostridia	o__Clostridiales	f__Clostridiales__na	g__Clostridiales__na	s__Clostridiales bacterium 59_14
1.48908	0.0100845	0.0182641	0.552148	0.580847	0.848961	k__Bacteria	p__Firmicutes	c__Clostridia	o__Clostridiales	f__Clostridiales__na	g__Clostridiales__na	s__Clostridiales bacterium GWD2_32_19
4.5923	-0.00834503	0.0151212	-0.551877	0.581033	0.848961	k__Bacteria	p__Actinobacteria	c__Actinobacteria	o__Bifidobacteriales	f__Bifidobacteriaceae	g__Bifidobacterium	s__Bifidobacterium aesculapii
3.7227	0.00777829	0.0141051	0.551453	0.581323	0.848961	k__Bacteria	p__Fibrobacteres	c__Fibrobacteria	o__Fibrobacterales	f__Fibrobacteraceae	g__Fibrobacter	s__Fibrobacter sp. UWEL
18.8853	0.0314278	0.0570078	0.551289	0.581436	0.848961	k__Bacteria	p__Firmicutes	c__Negativicutes	o__Selenomonadales	f__Selenomonadaceae	g__Megamonas	s__Megamonas funiformis CAG:377
27.4605	0.0436099	0.0792686	0.550154	0.582213	0.84962	k__Bacteria	p__Proteobacteria	c__Alphaproteobacteria	o__Rhodospirillales	f__Acetobacteraceae	g__Acetobacter	s__Acetobacter sp. CAG:977
0.904259	0.0194549	0.0354216	0.549238	0.582842	0.85006	k__Bacteria	p__Firmicutes	c__Bacilli	o__Lactobacillales	f__Streptococcaceae	g__Streptococcus	s__Streptococcus sp. SK140
3.21286	-0.0125991	0.0229767	-0.548342	0.583457	0.85048	k__Bacteria	p__Lentisphaerae	c__Lentisphaerae__na	o__Lentisphaerae__na	f__Lentisphaerae__na	g__Lentisphaerae__na	s__Lentisphaerae bacterium GWF2_38_69
4.46566	-0.0146928	0.0269447	-0.545295	0.58555	0.853052	k__Bacteria	p__Firmicutes	c__Bacilli	o__Lactobacillales	f__Streptococcaceae	g__Streptococcus	s__Streptococcus sp. HMSC061E03
57.8507	-0.00659354	0.0121051	-0.54469	0.585967	0.853181	k__Bacteria	p__Actinobacteria	c__Coriobacteriia	o__Eggerthellales	f__Eggerthellaceae	g__Slackia	s__Slackia heliotrinireducens
663.956	0.0830655	0.1527	0.543977	0.586458	0.853417	k__Bacteria	p__Firmicutes	c__Clostridia	o__Clostridiales	f__Clostridiaceae	g__Clostridium	s__Clostridium sp. CAG:533
1.7174	-0.00858616	0.0158198	-0.542747	0.587304	0.85417	k__Bacteria	p__Bacteroidetes	c__Bacteroidia	o__Marinilabiliales	f__Prolixibacteraceae	g__Draconibacterium	s__Draconibacterium sediminis
439.66	-0.0483452	0.0892199	-0.541866	0.587911	0.854575	k__Bacteria	p__Bacteroidetes	c__Bacteroidia	o__Bacteroidales	f__Prevotellaceae	g__Prevotella	s__Prevotella sp. CAG:5226
1.77036	0.0102493	0.0189346	0.541299	0.588301	0.854665	k__Bacteria	p__Actinobacteria	c__Actinobacteria	o__Bifidobacteriales	f__Bifidobacteriaceae	g__Bifidobacterium	s__Bifidobacterium bombi
8.31948	0.00485401	0.00897544	0.54081	0.588639	0.854677	k__Bacteria	p__Firmicutes	c__Clostridia	o__Clostridiales	f__Peptococcaceae	g__Peptococcaceae__uc	s__Peptococcaceae__uc
2.16879	-0.0199287	0.0368842	-0.540303	0.588988	0.854707	k__Bacteria	p__Firmicutes	c__Negativicutes	o__Selenomonadales	f__Selenomonadales__uc	g__Selenomonadales__uc	s__Selenomonadales__uc
4.43681	0.00533032	0.00987859	0.539583	0.589484	0.85495	k__Bacteria	p__Firmicutes	c__Clostridia	o__Clostridiales	f__Clostridiaceae	g__Clostridium	s__Clostridium grantii
19.6094	-0.0124393	0.0230868	-0.538805	0.590021	0.855251	k__Bacteria	p__Bacteria__na	c__Bacteria__na	o__Bacteria__na	f__Bacteria__na	g__Bacteria__na	s__bacterium P3
58.7186	0.00845036	0.0157292	0.537239	0.591103	0.855918	k__Bacteria	p__Firmicutes	c__Erysipelotrichia	o__Erysipelotrichales	f__Erysipelotrichaceae	g__Dielma	s__Dielma fastidiosa
15.732	-0.00556883	0.0103667	-0.537185	0.59114	0.855918	k__Bacteria	p__Firmicutes	c__Clostridia	o__Clostridiales	f__Lachnospiraceae	g__Oribacterium	s__Oribacterium asaccharolyticum
17.3957	-0.00726975	0.0135735	-0.535585	0.592246	0.857041	k__Bacteria	p__Firmicutes	c__Clostridia	o__Clostridiales	f__Lachnospiraceae	g__Sellimonas	s__Sellimonas intestinalis
0.832437	0.0279445	0.052268	0.534639	0.5929	0.85751	k__Bacteria	p__Firmicutes	c__Bacilli	o__Lactobacillales	f__Lactobacillaceae	g__Lactobacillus	s__Lactobacillus hominis
1.99855	0.00972701	0.0182339	0.533457	0.593718	0.857786	k__Bacteria	p__Actinobacteria	c__Actinobacteria	o__Bifidobacteriales	f__Bifidobacteriaceae	g__Bifidobacterium	s__Bifidobacterium sp. AGR2158
373.457	0.00567762	0.0106515	0.533032	0.594011	0.857786	k__Bacteria	p__Firmicutes	c__Clostridia	o__Clostridiales	f__Ruminococcaceae	g__Ruminococcus	s__Ruminococcus sp. SR1/5
17.9021	-0.0069584	0.0130568	-0.532933	0.59408	0.857786	k__Bacteria	p__Firmicutes	c__Clostridia	o__Clostridiales	f__Christensenellaceae	g__Christensenella	s__Christensenella__uc
817.034	0.0360208	0.067705	0.532025	0.594709	0.857817	k__Bacteria	p__Firmicutes	c__Clostridia	o__Clostridiales	f__Ruminococcaceae	g__Ruminococcus	s__Ruminococcus sp. CAG:403
112.451	-0.00854291	0.0160597	-0.531948	0.594762	0.857817	k__Bacteria	p__Bacteroidetes	c__Bacteroidia	o__Bacteroidales	f__Porphyromonadaceae	g__Coprobacter	s__Coprobacter secundus
89.6774	-0.00221039	0.00416917	-0.530175	0.59599	0.859027	k__Bacteria	p__Firmicutes	c__Clostridia	o__Clostridiales	f__Lachnospiraceae	g__Robinsoniella	s__Robinsoniella__uc
10.2571	-0.0091969	0.0173707	-0.529448	0.596494	0.859027	k__Bacteria	p__Actinobacteria	c__Actinobacteria	o__Bifidobacteriales	f__Bifidobacteriaceae	g__Bifidobacterium	s__Bifidobacterium boum
1178.72	0.00986473	0.0186371	0.529307	0.596593	0.859027	k__Bacteria	p__Firmicutes	c__Firmicutes__na	o__Firmicutes__na	f__Firmicutes__na	g__Firmicutes__na	s__Firmicutes bacterium CAG:102
5.05061	0.00847524	0.016045	0.528216	0.597349	0.859641	k__Bacteria	p__Firmicutes	c__Tissierellia	o__Tissierellales	f__Peptoniphilaceae	g__Anaerococcus	s__Anaerococcus lactolyticus
23.5943	0.00843338	0.0159893	0.52744	0.597888	0.85994	k__Bacteria	p__Firmicutes	c__Clostridia	o__Clostridiales	f__Peptococcaceae	g__Peptococcus	s__Peptococcus niger
5.1022	-0.00643249	0.0122437	-0.525374	0.599324	0.861528	k__Bacteria	p__Firmicutes	c__Clostridia	o__Clostridiales	f__Peptostreptococcaceae	g__Peptostreptococcus	s__Peptostreptococcus sp. MV1
9.96833	0.0111346	0.0212409	0.524206	0.600135	0.861976	k__Bacteria	p__Firmicutes	c__Bacilli	o__Lactobacillales	f__Streptococcaceae	g__Streptococcus	s__Streptococcus intermedius
273.702	0.070156	0.134027	0.523445	0.600664	0.861976	k__Bacteria	p__Firmicutes	c__Clostridia	o__Clostridiales	f__Clostridiaceae	g__Clostridium	s__Clostridium sp. CAG:354
5.47538	0.00600159	0.0114698	0.523251	0.600799	0.861976	k__Bacteria	p__Firmicutes	c__Clostridia	o__Clostridiales	f__Clostridiaceae	g__Alkaliphilus	s__Alkaliphilus oremlandii
73.223	0.00779934	0.014918	0.522814	0.601103	0.861976	k__Bacteria	p__Firmicutes	c__Clostridia	o__Clostridiales	f__Clostridiaceae	g__Clostridium	s__Clostridium leptum CAG:27
0.520208	0.0372772	0.0714506	0.52172	0.601865		k__Bacteria	p__Bacteroidetes	c__Flavobacteriia	o__Flavobacteriales	f__Flavobacteriaceae	g__Arenibacter	s__Arenibacter algicola
8.64416	0.00532696	0.0102127	0.521601	0.601948	0.861976	k__Bacteria	p__Firmicutes	c__Clostridia	o__Clostridiales	f__Peptostreptococcaceae	g__Peptostreptococcaceae__na	s__Peptostreptococcaceae bacterium oral taxon 113
2151.98	-0.00732403	0.0140452	-0.521461	0.602046	0.861976	k__Bacteria	p__Firmicutes	c__Clostridia	o__Clostridiales	f__Oscillospiraceae	g__Oscillibacter	s__Oscillibacter sp. 57_20
2.67772	-0.0100784	0.0193312	-0.521352	0.602122	0.861976	k__Bacteria	p__Firmicutes	c__Bacilli	o__Lactobacillales	f__Streptococcaceae	g__Streptococcus	s__Streptococcus marimammalium
131.293	0.00655983	0.0125903	0.521023	0.602351	0.861976	k__Bacteria	p__Firmicutes	c__Clostridia	o__Clostridiales	f__Ruminococcaceae	g__Negativibacillus	s__Negativibacillus massiliensis
0.91764	-0.0228193	0.0438296	-0.520636	0.602621	0.861976	k__Bacteria	p__Bacteroidetes	c__Bacteroidetes__na	o__Bacteroidetes__na	f__Bacteroidetes__na	g__Bacteroidetes__na	s__Bacteroidetes bacterium GWE2_40_15
8.53911	0.00424108	0.00818426	0.5182	0.604319	0.86393	k__Bacteria	p__Firmicutes	c__Clostridia	o__Clostridiales	f__Lachnospiraceae	g__Butyrivibrio	s__Butyrivibrio sp. MC2021
140.051	0.0103818	0.0201837	0.514365	0.606997	0.867281	k__Bacteria	p__Actinobacteria	c__Actinobacteria	o__Bifidobacteriales	f__Bifidobacteriaceae	g__Bifidobacteriaceae__uc	s__Bifidobacteriaceae__uc
1.60711	0.0110272	0.0216085	0.510319	0.609828	0.870492	k__Bacteria	p__Verrucomicrobia	c__Opitutae	o__Opitutales	f__Opitutaceae	g__Opitutaceae__uc	s__Opitutaceae__uc
3.02686	-0.00749698	0.0146995	-0.510014	0.610042	0.870492	k__Bacteria	p__Firmicutes	c__Negativicutes	o__Selenomonadales	f__Sporomusaceae	g__Anaeromusa	s__Anaeromusa acidaminophila
139.81	-0.00745072	0.0146256	-0.509429	0.610451	0.870492	k__Bacteria	p__Bacteroidetes	c__Bacteroidia	o__Bacteroidales	f__Porphyromonadaceae	g__Parabacteroides	s__Parabacteroides sp. Marseille-P3236
8.31019	0.00410158	0.00805431	0.50924	0.610584	0.870492	k__Bacteria	p__Firmicutes	c__Clostridia	o__Clostridiales	f__Clostridiaceae	g__Thermotalea	s__Thermotalea metallivorans
2.82109	-0.00694883	0.01383	-0.502445	0.615355	0.876813	k__Bacteria	p__Firmicutes	c__Clostridia	o__Clostridiales	f__Clostridiaceae	g__Clostridiaceae__na	s__Clostridiaceae bacterium BRH_c20a
112.428	-0.00431148	0.00859593	-0.501573	0.615968	0.876912	k__Bacteria	p__Firmicutes	c__Clostridia	o__Clostridiales	f__Lachnospiraceae	g__Lachnoclostridium	s__Lachnoclostridium phocaeense
1.47483	0.0122571	0.0244671	0.500962	0.616398	0.876912	k__Bacteria	p__Firmicutes	c__Tissierellia	o__Tissierellales	f__Peptoniphilaceae	g__Peptoniphilus	s__Peptoniphilus sp. HMSC062D09
235.781	-0.0104734	0.0209088	-0.500907	0.616436	0.876912	k__Bacteria	p__Firmicutes	c__Bacilli	o__Lactobacillales	f__Streptococcaceae	g__Streptococcus	s__Streptococcus parasanguinis
156.714	0.00716992	0.0143324	0.500259	0.616893	0.877081	k__Bacteria	p__Firmicutes	c__Erysipelotrichia	o__Erysipelotrichales	f__Erysipelotrichaceae	g__Erysipelatoclostridium	s__[Clostridium] saccharogumia
15.2727	0.0124195	0.0248751	0.499274	0.617586	0.877587	k__Bacteria	p__Firmicutes	c__Bacilli	o__Lactobacillales	f__Leuconostocaceae	g__Leuconostoc	s__Leuconostoc__uc
2803.97	-0.0632135	0.126848	-0.49834	0.618245	0.877779	k__Bacteria	p__Bacteroidetes	c__Bacteroidia	o__Bacteroidales	f__Prevotellaceae	g__Prevotella	s__Prevotella sp. CAG:520
2.76232	-0.0108019	0.0216852	-0.498124	0.618397	0.877779	k__Bacteria	p__Firmicutes	c__Bacilli	o__Lactobacillales	f__Enterococcaceae	g__Enterococcus	s__Enterococcus casseliflavus
8654.4	-0.00434703	0.00874923	-0.496847	0.619297	0.878577	k__Bacteria	p__Firmicutes	c__Clostridia	o__Clostridiales	f__Lachnospiraceae	g__Dorea	s__Dorea longicatena
54.5989	-0.00677417	0.0136665	-0.495675	0.620123	0.878772	k__Bacteria	p__Actinobacteria	c__Coriobacteriia	o__Coriobacteriales	f__Atopobiaceae	g__Olsenella	s__Olsenella__uc
777.005	-0.0595467	0.120383	-0.494642	0.620853	0.878772	k__Bacteria	p__Bacteroidetes	c__Bacteroidia	o__Bacteroidales	f__Prevotellaceae	g__Prevotella	s__Prevotella stercorea CAG:629
9.03095	-0.00599685	0.0121273	-0.49449	0.62096	0.878772	k__Bacteria	p__Firmicutes	c__Clostridia	o__Clostridiales	f__Clostridiaceae	g__Clostridium	s__Clostridium acetireducens
8.47139	-0.0124685	0.0252593	-0.493623	0.621573	0.878772	k__Bacteria	p__Proteobacteria	c__Deltaproteobacteria	o__Desulfovibrionales	f__Desulfomicrobiaceae	g__Desulfomicrobium	s__Desulfomicrobium orale
149.786	0.0575259	0.116548	0.493582	0.621601	0.878772	k__Bacteria	p__Fusobacteria	c__Fusobacteriia	o__Fusobacteriales	f__Fusobacteriaceae	g__Fusobacterium	s__Fusobacterium sp. CAG:815
221.075	-0.0067247	0.0136283	-0.493437	0.621704	0.878772	k__Bacteria	p__Bacteroidetes	c__Bacteroidia	o__Bacteroidales	f__Bacteroidaceae	g__Bacteroides	s__Bacteroides uniformis CAG:3
14.8459	-0.00469717	0.00952195	-0.493299	0.621801	0.878772	k__Bacteria	p__Actinobacteria	c__Coriobacteriia	o__Coriobacteriales	f__Atopobiaceae	g__Olsenella	s__Olsenella profusa
5290.57	0.00904472	0.0184536	0.490132	0.62404	0.881004	k__Bacteria	p__Bacteroidetes	c__Bacteroidia	o__Bacteroidales	f__Rikenellaceae	g__Alistipes	s__Alistipes putredinis
6.35224	-0.00903756	0.018458	-0.489628	0.624397	0.881004	k__Bacteria	p__Firmicutes	c__Tissierellia	o__Tissierellales	f__Peptoniphilaceae	g__Peptoniphilus	s__Peptoniphilus lacrimalis
3144.65	0.0593969	0.12131	0.489628	0.624397	0.881004	k__Bacteria	p__Firmicutes	c__Clostridia	o__Clostridiales	f__Clostridiaceae	g__Clostridium	s__Clostridium sp. CAG:138
8.42245	0.00381617	0.00781487	0.488322	0.625322	0.881299	k__Bacteria	p__Firmicutes	c__Clostridia	o__Clostridiales	f__Clostridiaceae	g__Hathewaya	s__Hathewaya proteolytica
1.97367	-0.0130675	0.0267716	-0.488111	0.625472	0.881299	k__Bacteria	p__Bacteroidetes	c__Bacteroidia	o__Bacteroidales	f__Porphyromonadaceae	g__Proteiniphilum	s__Proteiniphilum__uc
0.8353	0.0372972	0.0764452	0.487895	0.625624	0.881299	k__Bacteria	p__Proteobacteria	c__Betaproteobacteria	o__Burkholderiales	f__Alcaligenaceae	g__Bordetella	s__Bordetella bronchiseptica
0.691601	-0.0146768	0.0301269	-0.487165	0.626141		k__Bacteria	p__Actinobacteria	c__Actinobacteria	o__Actinomycetales	f__Actinomycetaceae	g__Actinomyces	s__Actinomyces sp. HMSC08A09
1.7944	0.0554132	0.114251	0.485014	0.627666	0.883327	k__Bacteria	p__Proteobacteria	c__Gammaproteobacteria	o__Enterobacterales	f__Enterobacteriaceae	g__Citrobacter	s__Citrobacter sp. FDAARGOS_156
2.52981	0.00807305	0.0166567	0.484671	0.62791	0.883327	k__Bacteria	p__Proteobacteria	c__Betaproteobacteria	o__Burkholderiales	f__Alcaligenaceae	g__Taylorella	s__Taylorella asinigenitalis
1.77694	0.0125469	0.0259006	0.484427	0.628083	0.883327	k__Bacteria	p__Proteobacteria	c__Gammaproteobacteria	o__Aeromonadales	f__Aeromonadaceae	g__Aeromonas	s__Aeromonas__uc
839.338	0.0331596	0.0685965	0.483401	0.628811	0.883872	k__Bacteria	p__Firmicutes	c__Clostridia	o__Clostridiales	f__Clostridiaceae	g__Clostridium	s__Clostridium sp. CAG:413
3.44354	0.00668123	0.0138596	0.482065	0.62976	0.884261	k__Bacteria	p__Proteobacteria	c__Gammaproteobacteria	o__Aeromonadales	f__Succinivibrionaceae	g__Succinimonas	s__Succinimonas amylolytica
3.18106	0.00519841	0.0107839	0.482053	0.629768	0.884261	k__Bacteria	p__Firmicutes	c__Clostridia	o__Clostridiales	f__Clostridiaceae	g__Clostridium	s__Clostridium sp. DMHC 10
26.7276	-0.00329518	0.00686166	-0.48023	0.631064	0.885274	k__Bacteria	p__Firmicutes	c__Clostridia	o__Clostridiales	f__Lachnospiraceae	g__Lachnoclostridium	s__[Clostridium] methoxybenzovorans
40.3481	-0.0108511	0.0226444	-0.479197	0.631799	0.885274	k__Bacteria	p__Bacteroidetes	c__Bacteroidia	o__Bacteroidales	f__Prevotellaceae	g__Prevotella	s__Prevotella nanceiensis
264.089	-0.00483649	0.0101072	-0.47852	0.63228	0.885274	k__Bacteria	p__Bacteroidetes	c__Bacteroidia	o__Bacteroidales	f__Odoribacteraceae	g__Odoribacter	s__Odoribacter sp. 43_10
196.453	0.00965832	0.0201919	0.478326	0.632418	0.885274	k__Bacteria	p__Bacteroidetes	c__Bacteroidia	o__Bacteroidales	f__Bacteroidaceae	g__Bacteroides	s__Bacteroides clarus CAG:160
52.2528	-0.00905366	0.018929	-0.478296	0.63244	0.885274	k__Bacteria	p__Firmicutes	c__Firmicutes__na	o__Firmicutes__na	f__Firmicutes__na	g__Firmicutes__na	s__Firmicutes bacterium CAG:308
189.353	0.00442641	0.00925709	0.478165	0.632533	0.885274	k__Bacteria	p__Firmicutes	c__Clostridia	o__Clostridiales	f__Ruminococcaceae	g__Subdoligranulum	s__Subdoligranulum sp. 4_3_54A2FAA
66.8661	-0.0091467	0.0191673	-0.477203	0.633217	0.885495	k__Bacteria	p__Bacteroidetes	c__Bacteroidia	o__Bacteroidales	f__Porphyromonadaceae	g__Coprobacter	s__Coprobacter fastidiosus
38.4993	-0.00393214	0.008251	-0.476566	0.633671	0.885495	k__Bacteria	p__Firmicutes	c__Clostridia	o__Clostridiales	f__Clostridiales__na	g__Clostridiales__na	s__Clostridiales bacterium VE202-28
1.41655	0.00869545	0.0182483	0.476507	0.633713	0.885495	k__Bacteria	p__Firmicutes	c__Bacilli	o__Bacillales	f__Bacillales__na	g__Acidibacillus	s__Acidibacillus ferrooxidans
0.574434	-0.0220063	0.0462335	-0.475983	0.634087		k__Bacteria	p__Bacteroidetes	c__Sphingobacteriia	o__Sphingobacteriales	f__Sphingobacteriaceae	g__Pedobacter	s__Pedobacter sp. NL19
42.2957	0.00351321	0.00738462	0.475746	0.634255	0.885776	k__Bacteria	p__Firmicutes	c__Clostridia	o__Clostridiales	f__Lachnospiraceae	g__Lachnospiraceae__na	s__Lachnospiraceae bacterium AC2014
16.3319	0.00398913	0.0084136	0.474129	0.635408	0.886726	k__Bacteria	p__Firmicutes	c__Clostridia	o__Clostridiales	f__Lachnospiraceae	g__Lachnospiraceae__na	s__Lachnospiraceae bacterium 3_1_57FAA_CT1
9.25748	0.00464068	0.00979777	0.473647	0.635752	0.886726	k__Bacteria	p__Firmicutes	c__Clostridia	o__Clostridiales	f__Lachnospiraceae	g__Shuttleworthia	s__Shuttleworthia sp. MSX8B
388.244	-0.0330841	0.0699613	-0.472891	0.636291	0.886726	k__Bacteria	p__Bacteroidetes	c__Bacteroidia	o__Bacteroidales	f__Prevotellaceae	g__Prevotella	s__Prevotella sp. S7-1-8
9.60061	0.0142878	0.0302145	0.472878	0.6363	0.886726	k__Bacteria	p__Firmicutes	c__Bacilli	o__Lactobacillales	f__Streptococcaceae	g__Streptococcus	s__Streptococcus sp. A12
0.78772	0.0279971	0.0595957	0.469784	0.638509	0.889328	k__Bacteria	p__Proteobacteria	c__Gammaproteobacteria	o__Enterobacterales	f__Enterobacteriaceae	g__Enterobacter	s__Enterobacter cloacae complex 'Hoffmann cluster IV'
2.6867	0.00749404	0.0160143	0.467959	0.639814	0.890668	k__Bacteria	p__Firmicutes	c__Negativicutes	o__Selenomonadales	f__Selenomonadaceae	g__Selenomonas	s__Selenomonas sp. FC4001
6.13187	-0.00647615	0.0138555	-0.467407	0.640209	0.89074	k__Bacteria	p__Actinobacteria	c__Coriobacteriia	o__Eggerthellales	f__Eggerthellaceae	g__Slackia	s__Slackia exigua
2.82694	0.00615153	0.0131756	0.466887	0.640581	0.890781	k__Bacteria	p__Firmicutes	c__Clostridia	o__Clostridiales	f__Clostridiaceae	g__Clostridium	s__Clostridium tetani
606.132	0.070758	0.15209	0.465238	0.641761	0.891939	k__Bacteria	p__Firmicutes	c__Clostridia	o__Clostridiales	f__Clostridiaceae	g__Clostridium	s__Clostridium sp. CAG:269
472.694	-0.0111407	0.0239799	-0.464587	0.642227	0.891939	k__Bacteria	p__Actinobacteria	c__Coriobacteriia	o__Eggerthellales	f__Eggerthellaceae	g__Eggerthella	s__Eggerthella sp. CAG:298
1.84174	-0.0106367	0.022936	-0.463755	0.642823	0.891939	k__Bacteria	p__Actinobacteria	c__Actinobacteria	o__Actinomycetales	f__Actinomycetaceae	g__Actinomyces	s__Actinomyces europaeus
24.8163	0.0095038	0.0205141	0.463281	0.643163	0.891939	k__Bacteria	p__Proteobacteria	c__Deltaproteobacteria	o__Desulfovibrionales	f__Desulfovibrionaceae	g__Desulfovibrio	s__Desulfovibrio sp. 6_1_46AFAA
121.128	-0.00535698	0.011578	-0.462686	0.643589	0.891939	k__Bacteria	p__Firmicutes	c__Clostridia	o__Clostridiales	f__Lachnospiraceae	g__Dorea	s__Dorea sp. 42_8
482.517	0.0124871	0.0269927	0.462611	0.643643	0.891939	k__Bacteria	p__Actinobacteria	c__Coriobacteriia	o__Eggerthellales	f__Eggerthellaceae	g__Cryptobacterium	s__Cryptobacterium sp. CAG:338
159.573	0.0634112	0.137302	0.461839	0.644197	0.891939	k__Bacteria	p__Firmicutes	c__Clostridia	o__Clostridiales	f__Clostridiaceae	g__Clostridium	s__Clostridium sp. CAG:433
21.3499	-0.00904023	0.0195911	-0.461445	0.644479	0.891939	k__Bacteria	p__Firmicutes	c__Bacilli	o__Lactobacillales	f__Streptococcaceae	g__Streptococcus	s__Streptococcus anginosus
2.7053	0.0109564	0.0237452	0.461413	0.644502	0.891939	k__Bacteria	p__Actinobacteria	c__Actinobacteria	o__Actinomycetales	f__Actinomycetaceae	g__Actinomyces	s__Actinomyces sp. oral taxon 181
2034.74	0.00474193	0.0103132	0.459793	0.645665	0.893073	k__Bacteria	p__Firmicutes	c__Clostridia	o__Clostridiales	f__Ruminococcaceae	g__Subdoligranulum	s__Subdoligranulum variabile
5.90096	-0.00713259	0.0155608	-0.458368	0.646688	0.894012	k__Bacteria	p__Firmicutes	c__Clostridia	o__Clostridiales	f__Clostridiaceae	g__Clostridium	s__Clostridium gasigenes
30.5004	0.00296675	0.00649582	0.456716	0.647875	0.894635	k__Bacteria	p__Firmicutes	c__Clostridia	o__Clostridiales	f__Lachnospiraceae	g__Lachnospiraceae__na	s__Lachnospiraceae bacterium MA2020
18.3735	0.00462978	0.0101383	0.456663	0.647913	0.894635	k__Bacteria	p__Firmicutes	c__Erysipelotrichia	o__Erysipelotrichales	f__Erysipelotrichaceae	g__Candidatus Stoquefichus	s__Candidatus Stoquefichus massiliensis
49.5739	-0.00573694	0.0125726	-0.456304	0.648171	0.894635	k__Bacteria	p__Firmicutes	c__Bacilli	o__Lactobacillales	f__Streptococcaceae	g__Streptococcus	s__Streptococcus pyogenes
2.91981	-0.0064373	0.0141318	-0.455519	0.648736	0.894939	k__Bacteria	p__Bacteroidetes	c__Bacteroidia	o__Marinilabiliales	f__Prolixibacteraceae	g__Prolixibacter	s__Prolixibacter bellariivorans
2.24018	-0.00702173	0.0154502	-0.454476	0.649487	0.895498	k__Bacteria	p__Firmicutes	c__Clostridia	o__Clostridiales	f__Peptostreptococcaceae	g__Acetoanaerobium	s__Acetoanaerobium sticklandii
410.232	-0.00653074	0.0144122	-0.45314	0.650448	0.895498	k__Bacteria	p__Firmicutes	c__Firmicutes__na	o__Firmicutes__na	f__Firmicutes__na	g__Firmicutes__na	s__Firmicutes bacterium CAG_194_44_15
48.2261	0.00286597	0.00632518	0.453106	0.650473	0.895498	k__Bacteria	p__Firmicutes	c__Clostridia	o__Clostridiales	f__Eubacteriaceae	g__Eubacterium	s__Eubacterium sp. 68-3-10
3.62605	-0.00549381	0.0121265	-0.45304	0.65052	0.895498	k__Bacteria	p__Firmicutes	c__Negativicutes	o__Selenomonadales	f__Sporomusaceae	g__Propionispora	s__Propionispora sp. 2/2-37
303.373	0.0689136	0.152395	0.452203	0.651123	0.895854	k__Bacteria	p__Verrucomicrobia	c__Verrucomicrobia__na	o__Verrucomicrobia__na	f__Verrucomicrobia__na	g__Verrucomicrobia__na	s__Verrucomicrobia bacterium CAG:312_58_20
618.452	0.0687823	0.15245	0.451179	0.65186	0.896394	k__Bacteria	p__Firmicutes	c__Clostridia	o__Clostridiales	f__Clostridiaceae	g__Clostridium	s__Clostridium sp. CAG:914
5.93459	0.0241064	0.0535268	0.450362	0.65245	0.89673	k__Bacteria	p__Proteobacteria	c__Gammaproteobacteria	o__Enterobacterales	f__Enterobacteriaceae	g__Klebsiella	s__Klebsiella variicola
10.5597	0.00322555	0.00718569	0.448886	0.653514	0.897718	k__Bacteria	p__Firmicutes	c__Clostridia	o__Clostridiales	f__Clostridiaceae	g__Clostridium	s__Clostridium pasteurianum
13.7315	0.0108777	0.0242886	0.447851	0.654261	0.89827	k__Bacteria	p__Firmicutes	c__Bacilli	o__Lactobacillales	f__Streptococcaceae	g__Lactococcus	s__Lactococcus__uc
4.8644	0.00447985	0.0100201	0.447087	0.654812	0.898551	k__Bacteria	p__Firmicutes	c__Clostridia	o__Clostridiales	f__Clostridiaceae	g__Clostridium	s__Clostridium homopropionicum
4.1429	-0.00478225	0.0107125	-0.446418	0.655296	0.898741	k__Bacteria	p__Firmicutes	c__Negativicutes	o__Veillonellales	f__Veillonellaceae	g__Veillonella	s__Veillonella magna
6.73054	-0.00975107	0.0218949	-0.445358	0.656061	0.899012	k__Bacteria	p__Proteobacteria	c__Gammaproteobacteria	o__Alteromonadales	f__Idiomarinaceae	g__Idiomarina	s__Idiomarina zobellii
19.1387	-0.00431781	0.00969887	-0.445186	0.656185	0.899012	k__Bacteria	p__Actinobacteria	c__Coriobacteriia	o__Coriobacteriales	f__Coriobacteriaceae	g__Collinsella	s__Collinsella sp. Marseille-P2666
0.39687	-0.0339032	0.0763422	-0.444096	0.656974		k__Bacteria	p__Proteobacteria	c__Gammaproteobacteria	o__Chromatiales	f__Chromatiaceae	g__Thiocapsa	s__Thiocapsa sp. KS1
2.99198	-0.0155407	0.0350705	-0.443129	0.657673	0.900231	k__Bacteria	p__Firmicutes	c__Bacilli	o__Lactobacillales	f__Carnobacteriaceae	g__Carnobacterium	s__Carnobacterium divergens
5.1616	-0.00837823	0.0189126	-0.442997	0.657768	0.900231	k__Bacteria	p__Actinobacteria	c__Actinobacteria	o__Actinomycetales	f__Actinomycetaceae	g__Actinomyces	s__Actinomyces sp. ICM54
87.0465	0.027089	0.0614252	0.441009	0.659207	0.901726	k__Bacteria	p__Bacteroidetes	c__Bacteroidia	o__Bacteroidales	f__Porphyromonadaceae	g__Tannerella	s__Tannerella__uc
334.835	0.00921172	0.0209219	0.440291	0.659727	0.901917	k__Bacteria	p__Bacteroidetes	c__Bacteroidia	o__Bacteroidales	f__Bacteroidaceae	g__Bacteroides	s__Bacteroides sp. CAG:1076
33.8749	0.0075684	0.0172065	0.439857	0.660041	0.901917	k__Bacteria	p__Firmicutes	c__Clostridia	o__Clostridiales	f__Clostridiaceae	g__Clostridium	s__Clostridium sp. CAG:352
95.7567	0.0572065	0.130334	0.438922	0.660718	0.902368	k__Bacteria	p__Firmicutes	c__Firmicutes__na	o__Firmicutes__na	f__Firmicutes__na	g__Firmicutes__na	s__Firmicutes bacterium CAG:582
4.53519	-0.0140596	0.0321357	-0.437508	0.661743	0.903293	k__Bacteria	p__Proteobacteria	c__Gammaproteobacteria	o__Pasteurellales	f__Pasteurellaceae	g__Aggregatibacter	s__Aggregatibacter aphrophilus
3.12782	0.00650766	0.0148939	0.436934	0.662159	0.903318	k__Bacteria	p__Firmicutes	c__Clostridia	o__Clostridiales	f__Clostridiaceae	g__Clostridium	s__Clostridium sp. BL8
27.6975	-0.00963784	0.0220786	-0.436524	0.662457	0.903318	k__Bacteria	p__Bacteroidetes	c__Bacteroidia	o__Bacteroidales	f__Prevotellaceae	g__Prevotellaceae__na	s__Prevotellaceae bacterium Marseille-P2826
6.77307	-0.00416655	0.00961939	-0.43314	0.664913	0.905811	k__Bacteria	p__Firmicutes	c__Bacilli	o__Bacillales	f__Bacillaceae	g__Bacillus	s__Bacillus cereus
92.1523	-0.00182419	0.00422006	-0.432267	0.665548	0.905811	k__Bacteria	p__Firmicutes	c__Clostridia	o__Clostridiales	f__Lachnospiraceae	g__Oribacterium	s__Oribacterium sp. oral taxon 078
127.25	0.0618655	0.143209	0.431996	0.665745	0.905811	k__Bacteria	p__Spirochaetes	c__Spirochaetia	o__Brachyspirales	f__Brachyspiraceae	g__Brachyspira	s__Brachyspira sp. CAG:484
46.6603	0.00265997	0.00616612	0.431384	0.666189	0.905811	k__Bacteria	p__Firmicutes	c__Clostridia	o__Clostridiales	f__Lachnospiraceae	g__Lachnospiraceae__na	s__Lachnospiraceae bacterium FE2018
2.2648	0.0137156	0.0318037	0.431258	0.666281	0.905811	k__Bacteria	p__Firmicutes	c__Bacilli	o__Bacillales	f__Staphylococcaceae	g__Staphylococcus	s__Staphylococcus pasteuri
15.8807	-0.0174116	0.0403861	-0.431127	0.666376	0.905811	k__Bacteria	p__Firmicutes	c__Negativicutes	o__Veillonellales	f__Veillonellaceae	g__Caecibacter	s__Caecibacter massiliensis
32.8165	0.00516794	0.0120248	0.429773	0.667361	0.906676	k__Bacteria	p__Firmicutes	c__Clostridia	o__Clostridiales	f__Ruminococcaceae	g__Bittarella	s__Bittarella massiliensis
3095.13	0.00758027	0.0176748	0.428874	0.668015	0.9067	k__Bacteria	p__Firmicutes	c__Firmicutes__na	o__Firmicutes__na	f__Firmicutes__na	g__Firmicutes__na	s__Firmicutes bacterium CAG:129
31.6879	0.0164473	0.0384056	0.428253	0.668467	0.9067	k__Bacteria	p__Proteobacteria	c__Gammaproteobacteria	o__Enterobacterales	f__Enterobacteriaceae	g__Citrobacter	s__Citrobacter__uc
180.753	0.065205	0.15275	0.426873	0.669472	0.9067	k__Bacteria	p__Firmicutes	c__Clostridia	o__Clostridiales	f__Clostridiaceae	g__Clostridium	s__Clostridium sp. CAG:813
27.9413	-0.00570829	0.013379	-0.426661	0.669626	0.9067	k__Bacteria	p__Firmicutes	c__Clostridia	o__Clostridiales	f__Lachnospiraceae	g__Lachnoanaerobaculum	s__Lachnoanaerobaculum sp. MSX33
11.2437	0.00291795	0.0068456	0.426251	0.669925	0.9067	k__Bacteria	p__Firmicutes	c__Clostridia	o__Clostridiales	f__Lachnospiraceae	g__Butyrivibrio	s__Butyrivibrio sp. NC2002
3.31684	-0.00852117	0.0200049	-0.425954	0.670142	0.9067	k__Bacteria	p__Bacteria__na	c__Bacteria__na	o__Bacteria__na	f__Bacteria__na	g__Bacteria__na	s__uncultured bacterium 5E7
0.580881	0.0347879	0.0817104	0.425746	0.670293		k__Bacteria	p__Tenericutes	c__Mollicutes	o__Mycoplasmatales	f__Mycoplasmataceae	g__Mycoplasma	s__Mycoplasma ovipneumoniae
168.268	0.0649037	0.152743	0.424922	0.670894	0.9067	k__Bacteria	p__Proteobacteria	c__Gammaproteobacteria	o__Pseudomonadales	f__Moraxellaceae	g__Acinetobacter	s__Acinetobacter sp. CAG:196
33.2334	-0.00328292	0.00772779	-0.424821	0.670967	0.9067	k__Bacteria	p__Firmicutes	c__Clostridia	o__Clostridiales	f__Peptostreptococcaceae	g__Peptoanaerobacter	s__Peptoanaerobacter stomatis
1254.73	0.0498052	0.117266	0.424719	0.671041	0.9067	k__Bacteria	p__Firmicutes	c__Negativicutes	o__Acidaminococcales	f__Acidaminococcaceae	g__Phascolarctobacterium	s__Phascolarctobacterium sp. CAG:266
8.10052	0.00368832	0.00870089	0.423901	0.671638	0.9067	k__Bacteria	p__Firmicutes	c__Clostridia	o__Clostridiales	f__Lachnospiraceae	g__Lachnospiraceae__na	s__Lachnospiraceae bacterium ND2006
17.6498	0.00906121	0.0213775	0.423867	0.671663	0.9067	k__Bacteria	p__Proteobacteria	c__Deltaproteobacteria	o__Desulfovibrionales	f__Desulfovibrionaceae	g__Desulfovibrio	s__Desulfovibrio legallii
5.47541	0.0046763	0.0110423	0.423491	0.671937	0.9067	k__Bacteria	p__Firmicutes	c__Clostridia	o__Clostridiales	f__Peptococcaceae	g__Peptococcaceae__na	s__Peptococcaceae bacterium CEB3
0.88345	0.0602652	0.142483	0.422963	0.672322	0.9067	k__Bacteria	p__Proteobacteria	c__Gammaproteobacteria	o__Aeromonadales	f__Succinivibrionaceae	g__Succinatimonas	s__Succinatimonas__uc
5610.07	0.0114	0.027046	0.421503	0.673388	0.9067	k__Bacteria	p__Firmicutes	c__Clostridia	o__Clostridiales	f__Ruminococcaceae	g__Ruminococcus	s__Ruminococcus sp. CAG:177
799.638	0.0640397	0.15207	0.421119	0.673668	0.9067	k__Bacteria	p__Firmicutes	c__Clostridia	o__Clostridiales	f__Clostridiaceae	g__Clostridium	s__Clostridium sp. CAG:343
5.82193	0.00474678	0.0112755	0.420982	0.673769	0.9067	k__Bacteria	p__Firmicutes	c__Negativicutes	o__Selenomonadales	f__Sporomusaceae	g__Sporomusa	s__Sporomusa__uc
6.74298	0.0050511	0.0119986	0.420975	0.673774	0.9067	k__Bacteria	p__Firmicutes	c__Clostridia	o__Clostridiales	f__Lachnospiraceae	g__Lachnoanaerobaculum	s__Lachnoanaerobaculum sp. ICM7
3081.55	0.0084137	0.0199888	0.420921	0.673813	0.9067	k__Bacteria	p__Actinobacteria	c__Actinobacteria	o__Bifidobacteriales	f__Bifidobacteriaceae	g__Bifidobacterium	s__Bifidobacterium longum
123.984	-0.00368284	0.00875501	-0.420655	0.674007	0.9067	k__Bacteria	p__Firmicutes	c__Firmicutes__na	o__Firmicutes__na	f__Firmicutes__na	g__Firmicutes__na	s__Firmicutes bacterium CAG:646
24.0759	0.00594367	0.014158	0.419811	0.674624	0.90706	k__Bacteria	p__Firmicutes	c__Clostridia	o__Clostridia__na	f__Clostridia__na	g__Clostridia__na	s__Clostridia bacterium UC5.1-1D10
0.994781	0.0159535	0.0382416	0.417177	0.676549	0.909178	k__Bacteria	p__Firmicutes	c__Bacilli	o__Bacillales	f__Listeriaceae	g__Brochothrix	s__Brochothrix thermosphacta
2.92081	0.00497641	0.0120112	0.414315	0.678643	0.911267	k__Bacteria	p__Firmicutes	c__Clostridia	o__Clostridiales	f__Clostridiales__na	g__Gottschalkia	s__Gottschalkia acidurici
379.847	-0.00907808	0.0219227	-0.414096	0.678804	0.911267	k__Bacteria	p__Firmicutes	c__Clostridia	o__Clostridiales	f__Clostridiaceae	g__Clostridium	s__Clostridium sp. CAG:221
2478.24	-0.00408716	0.00993069	-0.411568	0.680656	0.913281	k__Bacteria	p__Firmicutes	c__Clostridia	o__Clostridiales	f__Oscillospiraceae	g__Oscillibacter	s__Oscillibacter__uc
4.38057	0.00837307	0.02041	0.410243	0.681628	0.914113	k__Bacteria	p__Verrucomicrobia	c__Verrucomicrobiae	o__Verrucomicrobiales	f__Akkermansiaceae	g__Akkermansia	s__Akkermansia glycaniphila
2.97003	0.00492167	0.0120394	0.408798	0.682688	0.914696	k__Bacteria	p__Firmicutes	c__Clostridia	o__Clostridiales	f__Clostridiaceae	g__Clostridium	s__Clostridium lundense
14889.7	-0.0619561	0.151944	-0.407757	0.683452	0.914696	k__Bacteria	p__Bacteroidetes	c__Bacteroidia	o__Bacteroidales	f__Prevotellaceae	g__Prevotella	s__Prevotella copri CAG:164
105.097	-0.0400284	0.0981823	-0.407694	0.683498	0.914696	k__Bacteria	p__Firmicutes	c__Negativicutes	o__Acidaminococcales	f__Acidaminococcaceae	g__Acidaminococcus	s__Acidaminococcus sp. BV3L6
1.81422	-0.00958441	0.0235193	-0.407513	0.683631	0.914696	k__Bacteria	p__Proteobacteria	c__Epsilonproteobacteria	o__Campylobacterales	f__Campylobacteraceae	g__Campylobacter	s__Campylobacter hyointestinalis
3.23972	0.00495278	0.0121614	0.407253	0.683822	0.914696	k__Bacteria	p__Firmicutes	c__Clostridia	o__Clostridiales	f__Peptostreptococcaceae	g__Tepidibacter	s__Tepidibacter formicigenes
1232.9	-0.00350756	0.00863575	-0.406167	0.68462	0.915291	k__Bacteria	p__Firmicutes	c__Clostridia	o__Clostridiales	f__Clostridiales__na	g__Flavonifractor	s__uncultured Flavonifractor sp.
381.869	-0.00367385	0.00907093	-0.405013	0.685468	0.915507	k__Bacteria	p__Firmicutes	c__Clostridia	o__Clostridiales	f__Ruminococcaceae	g__Ruthenibacterium	s__Ruthenibacterium lactatiformans
3.55977	-0.00731033	0.0180701	-0.404554	0.685805	0.915507	k__Bacteria	p__Bacteroidetes	c__Bacteroidetes__na	o__Bacteroidetes__na	f__Bacteroidetes__na	g__Bacteroidetes__na	s__Bacteroidetes bacterium GWF2_40_14
7.39478	0.00489161	0.0121213	0.403555	0.68654	0.915507	k__Bacteria	p__Firmicutes	c__Clostridia	o__Clostridiales	f__Lachnospiraceae	g__Lachnospiraceae__na	s__Lachnospiraceae bacterium C10
16.1273	0.00573812	0.0142228	0.403446	0.68662	0.915507	k__Bacteria	p__Actinobacteria	c__Coriobacteriia	o__Coriobacteriales	f__Coriobacteriaceae	g__Collinsella	s__uncultured Collinsella sp. SMG3
107.801	-0.00504237	0.0124991	-0.40342	0.686639	0.915507	k__Bacteria	p__Firmicutes	c__Clostridia	o__Clostridiales	f__Oscillospiraceae	g__Oscillospiraceae__na	s__Oscillospiraceae bacterium VE202-24
426.344	0.0614952	0.152566	0.403073	0.686894	0.915507	k__Bacteria	p__Firmicutes	c__Clostridia	o__Clostridiales	f__Clostridiaceae	g__Clostridium	s__Clostridium sp. CAG:628
352.245	0.0613109	0.152428	0.402228	0.687516	0.915866	k__Bacteria	p__Firmicutes	c__Clostridia	o__Clostridiales	f__Clostridiaceae	g__Clostridium	s__Clostridium sp. CAG:302
12.6279	-0.00356266	0.00888368	-0.401034	0.688395	0.916567	k__Bacteria	p__Chloroflexi	c__Anaerolineae	o__Anaerolineales	f__Anaerolineaceae	g__Anaerolineaceae__na	s__Anaerolineaceae bacterium oral taxon 439
360.19	0.0608161	0.152272	0.399392	0.689604	0.917707	k__Bacteria	p__Firmicutes	c__Clostridia	o__Clostridiales	f__Clostridiaceae	g__Clostridium	s__Clostridium sp. CAG:354_28_25
3.70107	0.0047815	0.0120011	0.398424	0.690318	0.917848	k__Bacteria	p__Firmicutes	c__Clostridia	o__Thermoanaerobacterales	f__Thermoanaerobacteraceae	g__Tepidanaerobacter	s__Tepidanaerobacter acetatoxydans
1196.56	0.00803305	0.0201688	0.39829	0.690416	0.917848	k__Bacteria	p__Firmicutes	c__Clostridia	o__Clostridiales	f__Lachnospiraceae	g__Roseburia	s__Roseburia sp. CAG:18
25.2566	-0.00450948	0.0113565	-0.397084	0.691306	0.91815	k__Bacteria	p__Firmicutes	c__Clostridia	o__Clostridiales	f__Clostridiales__na	g__Levyella	s__Levyella massiliensis
286.458	0.00786614	0.0198128	0.397023	0.69135	0.91815	k__Bacteria	p__Firmicutes	c__Clostridia	o__Clostridiales	f__Eubacteriaceae	g__Eubacterium	s__Eubacterium sp. CAG:252
8.82218	0.010686	0.0269629	0.396324	0.691866	0.918336	k__Bacteria	p__Firmicutes	c__Bacilli	o__Lactobacillales	f__Streptococcaceae	g__Streptococcus	s__Streptococcus sp. 400_SSPC
0.605216	0.0239347	0.0604819	0.395734	0.692301		k__Bacteria	p__Proteobacteria	c__Gammaproteobacteria	o__Xanthomonadales	f__Xanthomonadaceae	g__Xanthomonas	s__Xanthomonas fuscans
1.90355	-0.017468	0.0441521	-0.395633	0.692376	0.918336	k__Bacteria	p__Chlamydiae	c__Chlamydiia	o__Chlamydiales	f__Chlamydiaceae	g__Chlamydia	s__Chlamydia suis
303.527	-0.0275029	0.0695577	-0.395397	0.69255	0.918336	k__Bacteria	p__Bacteroidetes	c__Bacteroidia	o__Bacteroidales	f__Bacteroidaceae	g__Bacteroides	s__Bacteroides sp. CAG:875
78.0227	0.00393466	0.010007	0.393191	0.694178	0.919959	k__Bacteria	p__Firmicutes	c__Clostridia	o__Clostridiales	f__Ruminococcaceae	g__Anaerotruncus	s__uncultured Anaerotruncus sp.
1.9536	-0.00866146	0.0220517	-0.39278	0.694482	0.919959	k__Bacteria	p__Bacteroidetes	c__Sphingobacteriia	o__Sphingobacteriales	f__Sphingobacteriaceae	g__Mucilaginibacter	s__Mucilaginibacter__uc
8.64374	-0.00419499	0.0107153	-0.391497	0.69543	0.920745	k__Bacteria	p__Firmicutes	c__Clostridia	o__Clostridiales	f__Clostridiales Family XIII. Incertae Sedis	g__Mogibacterium	s__Mogibacterium sp. CM50
2.80411	0.0389581	0.0997846	0.390422	0.696225	0.921328	k__Bacteria	p__Tenericutes	c__Mollicutes	o__Mollicutes__uc	f__Mollicutes__uc	g__Mollicutes__uc	s__Mollicutes__uc
0.472843	-0.0186164	0.0477244	-0.390081	0.696476		k__Bacteria	p__Proteobacteria	c__Gammaproteobacteria	o__Enterobacterales	f__Enterobacteriaceae	g__Trabulsiella	s__Trabulsiella__uc
224.931	0.0338999	0.0869372	0.389936	0.696584	0.921335	k__Bacteria	p__Bacteroidetes	c__Bacteroidia	o__Bacteroidales	f__Bacteroidaceae	g__Bacteroides	s__Bacteroides cellulosilyticus CAG:158
2.08068	-0.0115276	0.029641	-0.388907	0.697345	0.921871	k__Bacteria	p__Firmicutes	c__Tissierellia	o__Tissierellales	f__Peptoniphilaceae	g__Peptoniphilus	s__Peptoniphilus harei
3152.52	-0.00478139	0.0123506	-0.387138	0.698654	0.923133	k__Bacteria	p__Firmicutes	c__Clostridia	o__Clostridiales	f__Oscillospiraceae	g__Oscillibacter	s__Oscillibacter sp. ER4
97.2795	0.00409374	0.0105936	0.386433	0.699176	0.923352	k__Bacteria	p__Actinobacteria	c__Coriobacteriia	o__Eggerthellales	f__Eggerthellaceae	g__Eggerthella	s__Eggerthella sp. YY7918
[truncated: 653 more rows]

## Sheet: Table S2
Table S2. DESeq2 results for the bacterial taxa associated with the IOWA GAMBLING TEST (IGT) adjusting for age, sex and years of education in cohort 2 (n=24)
Those species also associated with the SCWT in the IRONMET corhot are highligthed in yellow
baseMean	log2FoldChange	lfcSE	stat	pvalue	padj	Kingdom	Phylum	Class	Order	Family	Genus	Species
3139.55	-0.150571	0.029454	-5.11206	3.18662e-07	0.000233898	r__Bacteria	p__Bacteroidetes	c__Bacteroidia	o__Bacteroidales	f__Bacteroidaceae	g__Bacteroides	s__Bacteroides-ovatus
34.6876	0.253886	0.053361	4.75789	1.95626e-06	0.000480796	r__Bacteria	p__Firmicutes	c__Bacilli	o__Lactobacillales	f__Leuconostocaceae	g__Leuconostoc	s__Leuconostoc-mesenteroides
399.708	-0.158206	0.0335575	-4.71449	2.42321e-06	0.000480796	r__Bacteria	p__Bacteroidetes	c__Bacteroidia	o__Bacteroidales	f__Porphyromonadaceae	g__Parabacteroides	s__Parabacteroides-sp.-D25
376.249	-0.151094	0.0321576	-4.69855	2.62014e-06	0.000480796	r__Bacteria	p__Bacteroidetes	c__Bacteroidia	o__Bacteroidales	f__Bacteroidaceae	g__Bacteroides	s__Bacteroides-sp.-3_1_19
250.687	-0.142432	0.0308676	-4.61428	3.94456e-06	0.000549607	r__Bacteria	p__Bacteroidetes	c__Bacteroidia	o__Bacteroidales	f__Bacteroidaceae	g__Bacteroides	s__Bacteroides-sp.-4_3_47FAA
1301.22	-0.141099	0.0307594	-4.58718	4.4927e-06	0.000549607	r__Bacteria	p__Bacteroidetes	c__Bacteroidia	o__Bacteroidales	f__Bacteroidaceae	g__Bacteroides	s__Bacteroides-thetaiotaomicron
2232.45	-0.156726	0.0350068	-4.47701	7.56949e-06	0.000793715	r__Bacteria	p__Bacteroidetes	c__Bacteroidia	o__Bacteroidales	f__Bacteroidaceae	g__Bacteroides	s__Bacteroides-caccae
4415.94	-0.17684	0.0404487	-4.37196	1.23138e-05	0.00101304	r__Bacteria	p__Bacteroidetes	c__Bacteroidia	o__Bacteroidales	f__Bacteroidaceae	g__Bacteroides	s__Bacteroides-sp.-4_1_36
23.57	0.0690692	0.0158051	4.37006	1.24214e-05	0.00101304	r__Bacteria	p__Firmicutes	c__Clostridia	o__Clostridiales	f__Peptoniphilaceae	g__Peptoniphilus	s__Peptoniphilus-duerdenii
120.408	0.232648	0.0565012	4.11757	3.82882e-05	0.00281035	r__Bacteria	p__Firmicutes	c__Bacilli	o__Lactobacillales	f__Streptococcaceae	g__Lactococcus	s__Lactococcus-lactis
10237.9	-0.151988	0.0376533	-4.03652	5.4251e-05	0.00362002	r__Bacteria	p__Bacteroidetes	c__Bacteroidia	o__Bacteroidales	f__Bacteroidaceae	g__Bacteroides	s__Bacteroides-uniformis
2755.04	-0.173854	0.0443753	-3.91782	8.93529e-05	0.00546542	r__Bacteria	p__Bacteroidetes	c__Bacteroidia	o__Bacteroidales	f__Bacteroidaceae	g__Bacteroides	s__Bacteroides-sp.-D20
239.155	-0.12846	0.0329954	-3.89328	9.88985e-05	0.00558396	r__Bacteria	p__Bacteroidetes	c__Bacteroidia	o__Bacteroidales	f__Bacteroidaceae	g__Bacteroides	s__Bacteroides-sp.-2_2_4
8370.01	-0.138025	0.0358603	-3.84895	0.000118623	0.00621926	r__Bacteria	p__Bacteroidetes	c__Bacteroidia	o__Bacteroidales	f__Bacteroidaceae	g__Bacteroides	s__Bacteroides-vulgatus
3544.97	-0.167687	0.044069	-3.80509	0.00014175	0.0069363	r__Bacteria	p__Bacteroidetes	c__Bacteroidia	o__Bacteroidales	f__Porphyromonadaceae	g__Barnesiella	s__Barnesiella-intestinihominis
389.076	-0.14123	0.0373641	-3.77984	0.00015693	0.00719917	r__Bacteria	p__Bacteroidetes	c__Bacteroidia	o__Bacteroidales	f__Bacteroidaceae	g__Bacteroides	s__Bacteroides-sp.-9_1_42FAA
3367.58	-0.12228	0.0333239	-3.66943	0.000243091	0.0104958	r__Bacteria	p__Bacteroidetes	c__Bacteroidia	o__Bacteroidales	f__Porphyromonadaceae	g__Parabacteroides	s__Parabacteroides-merdae
475.455	-0.106114	0.0294262	-3.6061	0.000310828	0.0126749	r__Bacteria	p__Bacteroidetes	c__Bacteroidia	o__Bacteroidales	f__Bacteroidaceae	g__Bacteroides	s__Bacteroides-sp.-1_1_14
20.9843	0.246117	0.0687155	3.58168	0.000341398	0.012884	r__Bacteria	p__Firmicutes	c__Bacilli	o__Lactobacillales	f__Leuconostocaceae	g__Leuconostoc	s__Leuconostoc-carnosum
279.706	-0.106762	0.0298686	-3.57438	0.000351063	0.012884	r__Bacteria	p__Bacteroidetes	c__Bacteroidia	o__Bacteroidales	f__Bacteroidaceae	g__Bacteroides	s__Bacteroides-sp.-3_1_23
23.7554	-0.105864	0.0298412	-3.54757	0.000388805	0.0135896	r__Bacteria	p__Bacteroidetes	c__Bacteroidia	o__Bacteroidales	f__Porphyromonadaceae	g__Parabacteroides	s__Parabacteroides-sp.-2_1_7
18.0977	0.199439	0.0568306	3.50937	0.000449176	0.0149862	r__Bacteria	p__Firmicutes	c__Bacilli	o__Lactobacillales	f__Lactobacillaceae	g__Lactobacillus	s__Lactobacillus-vaginalis
1257.48	-0.122718	0.0353819	-3.46837	0.000523626	0.0167105	r__Bacteria	p__Bacteroidetes	c__Bacteroidia	o__Bacteroidales	f__Bacteroidaceae	g__Bacteroides	s__Bacteroides-sp.-3_1_40A
1728.01	-0.14691	0.0429703	-3.41888	0.000628805	0.0192309	r__Bacteria	p__Bacteroidetes	c__Bacteroidia	o__Bacteroidales	f__Rikenellaceae	g__Alistipes	s__Alistipes-sp.-HGB5
4675.89	-0.135611	0.0405214	-3.34666	0.000817916	0.024014	r__Bacteria	p__Bacteroidetes	c__Bacteroidia	o__Bacteroidales	f__Rikenellaceae	g__Alistipes	s__Alistipes-finegoldii
370.902	-0.0946668	0.0289918	-3.2653	0.00109348	0.0308698	r__Bacteria	p__Bacteroidetes	c__Bacteroidia	o__Bacteroidales	f__Bacteroidaceae	g__Bacteroides	s__Bacteroides-sp.-1_1_6
64.2354	0.13476	0.0419835	3.20984	0.00132809	0.0361045	r__Bacteria	p__Firmicutes	c__Bacilli	o__Lactobacillales	f__Lactobacillaceae	g__Lactobacillus	s__Lactobacillus-gasseri
60.6949	0.0367724	0.0118308	3.10818	0.00188245	0.049347	r__Bacteria	p__Firmicutes	c__Clostridia	o__Thermoanaerobacterales	f__Thermoanaerobacteraceae	g__Tepidanaerobacter	s__Tepidanaerobacter-acetatoxydans
45.5016	0.0839416	0.0273447	3.06976	0.0021423	0.0542224	r__Bacteria	p__Actinobacteria	c__Actinobacteria	o__Actinomycetales	f__Actinomycetaceae	g__Actinomyces	s__Actinomyces-sp.-oral-taxon-170
1709.89	-0.105078	0.0344482	-3.05031	0.00228604	0.0559317	r__Bacteria	p__Bacteroidetes	c__Bacteroidia	o__Bacteroidales	f__Bacteroidaceae	g__Bacteroides	s__Bacteroides-fragilis
3466.17	-0.105108	0.0345862	-3.03901	0.00237354	0.0561993	r__Bacteria	p__Bacteroidetes	c__Bacteroidia	o__Bacteroidales	f__Porphyromonadaceae	g__Parabacteroides	s__Parabacteroides-distasonis
437.849	0.203087	0.067057	3.02857	0.0024571	0.0563598	r__Bacteria	p__Actinobacteria	c__Actinobacteria	o__Actinomycetales	f__Actinomycetaceae	g__Actinomyces	s__Actinomyces-turicensis
1612.27	-0.166344	0.0559486	-2.97315	0.00294756	0.0655609	r__Bacteria	p__Actinobacteria	c__Actinobacteria	o__Bifidobacteriales	f__Bifidobacteriaceae	g__Bifidobacterium	s__Bifidobacterium-pseudocatenulatum
1894.55	-0.102315	0.0345681	-2.95981	0.00307824	0.0664539	r__Bacteria	p__Bacteroidetes	c__Bacteroidia	o__Bacteroidales	f__Bacteroidaceae	g__Bacteroides	s__Bacteroides-xylanisolvens
1784.13	-0.0974678	0.0333132	-2.9258	0.00343569	0.0720514	r__Bacteria	p__Firmicutes	c__Clostridia	o__Clostridiales	f__Ruminococcaceae	g__Ruminococcus	s__Ruminococcus-albus
251.62	-0.101665	0.0349869	-2.90581	0.00366302	0.0746849	r__Bacteria	p__Bacteroidetes	c__Bacteroidia	o__Bacteroidales	f__Bacteroidaceae	g__Bacteroides	s__Bacteroides-sp.-D22
1403.37	-0.135936	0.0472773	-2.87529	0.00403652	0.0800759	r__Bacteria	p__Bacteroidetes	c__Bacteroidia	o__Bacteroidales	f__Rikenellaceae	g__Alistipes	s__Alistipes-indistinctus
942.735	-0.120956	0.0422719	-2.86139	0.00421792	0.0814725	r__Bacteria	p__Bacteroidetes	c__Bacteroidia	o__Bacteroidales	f__Bacteroidaceae	g__Bacteroides	s__Bacteroides-salyersiae
31.4047	-0.0770128	0.0271552	-2.83602	0.00456796	0.0830768	r__Bacteria	p__Bacteroidetes	c__Cytophagia	o__Cytophagales	f__Cytophagaceae	g__Dyadobacter	s__Dyadobacter-fermentans
509.67	-0.0995949	0.0351484	-2.83355	0.00460335	0.0830768	r__Bacteria	p__Bacteroidetes	c__Bacteroidia	o__Bacteroidales	f__Bacteroidaceae	g__Bacteroides	s__Bacteroides-sp.-1_1_30
28.0627	0.0922516	0.0325864	2.83098	0.00464053	0.0830768	r__Bacteria	p__Firmicutes	c__Bacilli	o__Bacillales	f__Bacillales_n	g__Gemella	s__Gemella-haemolysans
72.0866	-0.0815341	0.0295747	-2.75689	0.00583535	0.0976388	r__Bacteria	p__Bacteroidetes	c__Bacteroidia	o__Bacteroidales	f__Porphyromonadaceae	g__Dysgonomonas	s__Dysgonomonas-gadei
38.3493	0.102371	0.0371619	2.75474	0.00587392	0.0976388	r__Bacteria	p__Firmicutes	c__Bacilli	o__Lactobacillales	f__Lactobacillaceae	g__Lactobacillus	s__Lactobacillus-fermentum
22.5242	0.0478145	0.0173636	2.75372	0.00589223	0.0976388	r__Bacteria	p__Firmicutes	c__Clostridia	o__Clostridiales	f__Peptoniphilaceae	g__Anaerococcus	s__Anaerococcus-hydrogenalis
22.6195	0.0459052	0.0167194	2.74562	0.00603969	0.0976388	r__Bacteria	p__Spirochaetes	c__Spirochaetia	o__Spirochaetales	f__Spirochaetaceae	g__Treponema	s__Treponema-phagedenis
111.41	0.117072	0.0427062	2.74133	0.00611905	0.0976388	r__Bacteria	p__Firmicutes	c__Bacilli	o__Lactobacillales	f__Streptococcaceae	g__Streptococcus	s__Streptococcus-infantarius
18.844	0.0749759	0.0277365	2.70315	0.00686866	0.104746	r__Bacteria	p__Firmicutes	c__Negativicutes	o__Selenomonadales	f__Veillonellaceae	g__Megasphaera	s__Megasphaera-genomosp.-type_1
37.6237	-0.0636634	0.0235614	-2.70202	0.006892	0.104746	r__Bacteria	p__Bacteroidetes	c__Cytophagia	o__Cytophagales	f__Cytophagaceae	g__Fibrella	s__Fibrella-aestuarina
84.3267	-0.0811357	0.0300815	-2.6972	0.00699257	0.104746	r__Bacteria	p__Bacteroidetes	c__Bacteroidia	o__Bacteroidales	f__Bacteroidaceae	g__Bacteroides	s__Bacteroides-sp.-2_1_16
70.56	0.040892	0.0152372	2.68368	0.00728158	0.106894	r__Bacteria	p__Firmicutes	c__Clostridia	o__Clostridiales	f__Ruminococcaceae	g__Mageeibacillus	s__Mageeibacillus-indolicus
19.8111	-0.0711516	0.0266492	-2.66993	0.00758665	0.109188	r__Bacteria	p__Bacteroidetes	c__Sphingobacteriia	o__Sphingobacteriales	f__Chitinophagaceae	g__Niastella	s__Niastella-koreensis
19.2559	0.0921106	0.0346117	2.66126	0.00778492	0.109887	r__Bacteria	p__Firmicutes	c__Bacilli	o__Lactobacillales	f__Streptococcaceae	g__Streptococcus	s__Streptococcus-urinalis
8472.1	0.0562955	0.0212893	2.64431	0.00818584	0.112896	r__Bacteria	p__Firmicutes	c__Clostridia	o__Clostridiales	f__Eubacteriaceae	g__Eubacterium	s__[Eubacterium]-hallii
731.336	-0.119178	0.0452035	-2.63648	0.00837705	0.112896	r__Bacteria	p__Bacteroidetes	c__Bacteroidia	o__Bacteroidales	f__Porphyromonadaceae	g__Parabacteroides	s__Parabacteroides-goldsteinii
134.829	-0.0962672	0.0365596	-2.63316	0.00845948	0.112896	r__Bacteria	p__Bacteroidetes	c__Bacteroidia	o__Bacteroidales	f__Porphyromonadaceae	g__Tannerella	s__Tannerella-forsythia
52.4533	0.0735516	0.0281297	2.61473	0.00892975	0.117044	r__Bacteria	p__Actinobacteria	c__Actinobacteria	o__Actinomycetales	f__Actinomycetaceae	g__Mobiluncus	s__Mobiluncus-curtisii
4338.85	0.156556	0.0609713	2.5677	0.0102376	0.131832	r__Bacteria	p__Firmicutes	c__Erysipelotrichia	o__Erysipelotrichales	f__Erysipelotrichaceae	g__Catenibacterium	s__Catenibacterium-mitsuokai
15.6289	0.0474252	0.0185282	2.55963	0.0104784	0.132606	r__Bacteria	p__Firmicutes	c__Bacilli	o__Bacillales	f__Sporolactobacillaceae	g__Sporolactobacillaceae_n	s__[Bacillus]-selenitireducens
59.6707	0.0730922	0.0289273	2.52675	0.0115123	0.143221	r__Bacteria	p__Firmicutes	c__Bacilli	o__Lactobacillales	f__Streptococcaceae	g__Streptococcus	s__Streptococcus-lutetiensis
37.435	-0.0839134	0.0335355	-2.50222	0.0123416	0.150979	r__Bacteria	p__Bacteroidetes	c__Bacteroidia	o__Bacteroidales	f__Porphyromonadaceae	g__Porphyromonas	s__Porphyromonas-asaccharolytica
27.9176	0.0949331	0.0385601	2.46195	0.0138184	0.16577	r__Bacteria	p__Firmicutes	c__Bacilli	o__Lactobacillales	f__Carnobacteriaceae	g__Granulicatella	s__Granulicatella-elegans
160.687	-0.0794145	0.0323542	-2.45454	0.0141066	0.16577	r__Bacteria	p__Bacteroidetes	c__Bacteroidia	o__Bacteroidales	f__Bacteroidaceae	g__Bacteroides	s__Bacteroides-sp.-D2
1463.91	-0.11405	0.0466277	-2.44597	0.0144462	0.16577	r__Bacteria	p__Bacteroidetes	c__Bacteroidia	o__Bacteroidales	f__Bacteroidaceae	g__Bacteroides	s__Bacteroides-cellulosilyticus
18.1602	-0.0559791	0.0228881	-2.44578	0.0144541	0.16577	r__Bacteria	p__Bacteroidetes	c__Sphingobacteriia	o__Sphingobacteriales	f__Chitinophagaceae	g__Chitinophaga	s__Chitinophaga-pinensis
566.772	0.0792273	0.032587	2.43126	0.0150465	0.165993	r__Bacteria	p__Actinobacteria	c__Coriobacteriia	o__Eggerthellales	f__Eggerthellaceae	g__Slackia	s__Slackia-piriformis
203.724	-0.0777907	0.0320047	-2.43061	0.0150736	0.165993	r__Bacteria	p__Bacteroidetes	c__Bacteroidia	o__Bacteroidales	f__Bacteroidaceae	g__Bacteroides	s__Bacteroides-sp.-2_1_22
446.587	-0.0906418	0.0373679	-2.42566	0.0152808	0.165993	r__Bacteria	p__Bacteroidetes	c__Bacteroidia	o__Bacteroidales	f__Bacteroidaceae	g__Bacteroides	s__Bacteroides-fluxus
22.7068	0.040959	0.0169018	2.42335	0.0153781	0.165993	r__Bacteria	p__Firmicutes	c__Clostridia	o__Clostridiales	f__Peptoniphilaceae	g__Peptoniphilus	s__Peptoniphilus-sp.-oral-taxon-375
246.916	-0.08908	0.0370881	-2.40185	0.0163126	0.171103	r__Bacteria	p__Bacteroidetes	c__Bacteroidia	o__Bacteroidales	f__Porphyromonadaceae	g__Parabacteroides	s__Parabacteroides-sp.-20_3
25.0123	0.0827029	0.0344347	2.40173	0.0163178	0.171103	r__Bacteria	p__Firmicutes	c__Bacilli	o__Lactobacillales	f__Lactobacillaceae	g__Lactobacillus	s__Lactobacillus-paracasei
138.352	-0.101034	0.0422392	-2.39196	0.0167588	0.173253	r__Bacteria	p__Bacteroidetes	c__Bacteroidia	o__Bacteroidales	f__Prevotellaceae	g__Prevotella	s__Prevotella-bivia
19.1319	0.0552972	0.0233178	2.37146	0.0177181	0.180626	r__Bacteria	p__Firmicutes	c__Bacilli	o__Bacillales	f__Staphylococcaceae	g__Staphylococcus	s__Staphylococcus-epidermidis
320.585	-0.0918846	0.0391871	-2.34477	0.0190389	0.191042	r__Bacteria	p__Firmicutes	c__Bacilli	o__Lactobacillales	f__Enterococcaceae	g__Enterococcus	s__Enterococcus-faecium
6387.21	-0.108472	0.0463466	-2.34045	0.0192603	0.191042	r__Bacteria	p__Bacteroidetes	c__Bacteroidia	o__Bacteroidales	f__Rikenellaceae	g__Alistipes	s__Alistipes-shahii
47.1509	-0.102032	0.043895	-2.32444	0.0201017	0.196729	r__Bacteria	p__Firmicutes	c__Bacilli	o__Lactobacillales	f__Enterococcaceae	g__Enterococcus	s__Enterococcus-hirae
280.573	0.0297098	0.0128219	2.31712	0.0204974	0.197373	r__Bacteria	p__Firmicutes	c__Clostridia	o__Clostridiales	f__Heliobacteriaceae	g__Heliobacterium	s__Heliobacterium-modesticaldum
2443.67	-0.0676582	0.0292473	-2.31332	0.0207053	0.197373	r__Bacteria	p__Actinobacteria	c__Coriobacteriia	o__Eggerthellales	f__Eggerthellaceae	g__Adlercreutzia	s__Adlercreutzia-equolifaciens
57.027	0.0891028	0.0386511	2.30531	0.0211492	0.199019	r__Bacteria	p__Actinobacteria	c__Coriobacteriia	o__Coriobacteriales	f__Atopobiaceae	g__Atopobium	s__Atopobium-vaginae
34.3371	0.0610095	0.0265791	2.29539	0.0217108	0.20068	r__Bacteria	p__Actinobacteria	c__Actinobacteria	o__Actinomycetales	f__Actinomycetaceae	g__Actinomyces	s__Actinomyces-sp.-oral-taxon-171
588.848	-0.0902677	0.0393888	-2.29171	0.0219224	0.20068	r__Bacteria	p__Bacteroidetes	c__Bacteroidia	o__Bacteroidales	f__Prevotellaceae	g__Paraprevotella	s__Paraprevotella-xylaniphila
363.228	-0.0776867	0.0339561	-2.28786	0.0221459	0.20068	r__Bacteria	p__Bacteroidetes	c__Bacteroidia	o__Bacteroidales	f__Bacteroidaceae	g__Bacteroides	s__Bacteroides-oleiciplenus
47.0707	0.0358027	0.0157115	2.27876	0.0226811	0.203023	r__Bacteria	p__Firmicutes	c__Clostridia	o__Clostridiales	f__Peptostreptococcaceae	g__Peptostreptococcaceae_n	s__Peptostreptococcaceae-bacterium-CM5
1354.68	-0.128598	0.0569105	-2.25966	0.0238424	0.210847	r__Bacteria	p__Actinobacteria	c__Actinobacteria	o__Bifidobacteriales	f__Bifidobacteriaceae	g__Bifidobacterium	s__Bifidobacterium-catenulatum
391.812	-0.0753527	0.0336249	-2.24098	0.0250274	0.212993	r__Bacteria	p__Bacteroidetes	c__Bacteroidia	o__Bacteroidales	f__Porphyromonadaceae	g__Parabacteroides	s__Parabacteroides-sp.-D13
178.914	-0.0863865	0.0386343	-2.23601	0.0253514	0.212993	r__Bacteria	p__Bacteroidetes	c__Bacteroidia	o__Bacteroidales	f__Bacteroidaceae	g__Bacteroides	s__Bacteroides-sp.-2_1_33B
27.3312	0.0861058	0.0385674	2.23261	0.0255749	0.212993	r__Bacteria	p__Firmicutes	c__Bacilli	o__Lactobacillales	f__Streptococcaceae	g__Streptococcus	s__Streptococcus-macedonicus
110.213	-0.0720865	0.0322978	-2.23193	0.0256194	0.212993	r__Bacteria	p__Bacteroidetes	c__Bacteroidia	o__Bacteroidales	f__Bacteroidaceae	g__Bacteroides	s__Bacteroides-sp.-2_1_56FAA
53.9884	0.0814094	0.0365078	2.22992	0.025753	0.212993	r__Bacteria	p__Actinobacteria	c__Coriobacteriia	o__Coriobacteriales	f__Atopobiaceae	g__Atopobium	s__Atopobium-parvulum
108.552	0.0894248	0.0401897	2.22507	0.0260766	0.212993	r__Bacteria	p__Actinobacteria	c__Actinobacteria	o__Actinomycetales	f__Actinomycetaceae	g__Actinomyces	s__Actinomyces-sp.-oral-taxon-180
59.4817	0.0951638	0.0427803	2.22448	0.0261163	0.212993	r__Bacteria	p__Firmicutes	c__Negativicutes	o__Selenomonadales	f__Acidaminococcaceae	g__Acidaminococcus	s__Acidaminococcus-sp.-D21
16.9393	-0.0748672	0.0341917	-2.18963	0.028551	0.230291	r__Bacteria	p__Bacteroidetes	c__Bacteroidia	o__Bacteroidales	f__Bacteroidaceae	g__Bacteroides	s__Bacteroides-sp.-D1
23.371	0.0384588	0.0176838	2.17481	0.0296445	0.236511	r__Bacteria	p__Firmicutes	c__Clostridia	o__Clostridiales	f__Peptostreptococcaceae	g__Peptostreptococcaceae_n	s__Peptostreptococcaceae-bacterium-ACC19a
76.117	-0.0697304	0.0322794	-2.16021	0.030756	0.240932	r__Bacteria	p__Bacteroidetes	c__Bacteroidia	o__Bacteroidales	f__Prevotellaceae	g__Paraprevotella	s__Paraprevotella-clara
169.064	0.0649082	0.0301093	2.15575	0.031103	0.240932	r__Bacteria	p__Firmicutes	c__Bacilli	o__Lactobacillales	f__Lactobacillaceae	g__Lactobacillus	s__Lactobacillus-crispatus
942.648	-0.112443	0.0522777	-2.15088	0.0314854	0.240932	r__Bacteria	p__Proteobacteria	c__Betaproteobacteria	o__Burkholderiales	f__Sutterellaceae	g__Sutterella	s__Sutterella-wadsworthensis
20.6705	0.0685951	0.0318965	2.15055	0.0315116	0.240932	r__Bacteria	p__Firmicutes	c__Bacilli	o__Lactobacillales	f__Streptococcaceae	g__Streptococcus	s__Streptococcus-equinus
261.813	-0.0836603	0.0390584	-2.14193	0.0321993	0.243653	r__Bacteria	p__Bacteroidetes	c__Bacteroidia	o__Bacteroidales	f__Bacteroidaceae	g__Bacteroides	s__Bacteroides-helcogenes
318.65	-0.0634947	0.0298802	-2.12498	0.0335886	0.251571	r__Bacteria	p__Bacteroidetes	c__Bacteroidia	o__Bacteroidales	f__Bacteroidaceae	g__Bacteroides	s__Bacteroides-nordii
28.1954	0.0545413	0.0261888	2.08262	0.0372858	0.276442	r__Bacteria	p__Spirochaetes	c__Spirochaetia	o__Brachyspirales	f__Brachyspiraceae	g__Brachyspira	s__Brachyspira-pilosicoli
111.785	-0.0233153	0.0112898	-2.06516	0.0389082	0.285587	r__Bacteria	p__Spirochaetes	c__Spirochaetia	o__Spirochaetales	f__Spirochaetaceae	g__Treponema	s__Treponema-brennaborense
726.41	0.139092	0.0676114	2.05722	0.0396647	0.288194	r__Bacteria	p__Firmicutes	c__Bacilli	o__Lactobacillales	f__Lactobacillaceae	g__Lactobacillus	s__Lactobacillus-ruminis
54.5306	0.0797925	0.0389351	2.04937	0.040426	0.288194	r__Bacteria	p__Actinobacteria	c__Actinobacteria	o__Actinomycetales	f__Actinomycetaceae	g__Actinomyces	s__Actinomyces-sp.
145.66	-0.0854712	0.0418613	-2.04177	0.0411743	0.288194	r__Bacteria	p__Proteobacteria	c__Betaproteobacteria	o__Burkholderiales	f__Sutterellaceae	g__Parasutterella	s__Parasutterella-excrementihominis
9187.21	0.0478132	0.0234236	2.04124	0.0412274	0.288194	r__Bacteria	p__Firmicutes	c__Clostridia	o__Clostridiales	f__Ruminococcaceae	g__Ruminococcus	s__Ruminococcus-torques
1703.31	-0.081378	0.0400286	-2.033	0.0420528	0.288194	r__Bacteria	p__Bacteroidetes	c__Bacteroidia	o__Bacteroidales	f__Porphyromonadaceae	g__Odoribacter	s__Odoribacter-splanchnicus
39.2439	-0.0627952	0.0310194	-2.02438	0.0429308	0.288194	r__Bacteria	p__Bacteroidetes	c__Bacteroidia	o__Bacteroidales	f__Porphyromonadaceae	g__Paludibacter	s__Paludibacter-propionicigenes
22.864	0.0567381	0.0281058	2.01873	0.0435152	0.288194	r__Bacteria	p__Firmicutes	c__Bacilli	o__Lactobacillales	f__Streptococcaceae	g__Streptococcus	s__Streptococcus-pasteurianus
4941.94	0.123144	0.0610728	2.01635	0.0437631	0.288194	r__Bacteria	p__Firmicutes	c__Erysipelotrichia	o__Erysipelotrichales	f__Erysipelotrichaceae	g__Holdemanella	s__Holdemanella-biformis
17.2903	-0.0276443	0.0137309	-2.01329	0.0440837	0.288194	r__Bacteria	p__Proteobacteria	c__Betaproteobacteria	o__Burkholderiales	f__Comamonadaceae	g__Verminephrobacter	s__Verminephrobacter-eiseniae
85.0837	0.0514754	0.0255719	2.01296	0.0441183	0.288194	r__Bacteria	p__Firmicutes	c__Bacilli	o__Lactobacillales	f__Lactobacillaceae	g__Lactobacillus	s__Lactobacillus-jensenii
184.399	0.106521	0.0529635	2.01121	0.0443029	0.288194	r__Bacteria	p__Firmicutes	c__Bacilli	o__Lactobacillales	f__Streptococcaceae	g__Streptococcus	s__Streptococcus-infantis
275.457	-0.0880913	0.0438086	-2.01082	0.0443444	0.288194	r__Bacteria	p__Bacteroidetes	c__Bacteroidia	o__Bacteroidales	f__Porphyromonadaceae	g__Odoribacter	s__Odoribacter-laneus
20.6132	0.091639	0.0455779	2.0106	0.0443677	0.288194	r__Bacteria	p__Firmicutes	c__Bacilli	o__Lactobacillales	f__Streptococcaceae	g__Streptococcus	s__Streptococcus-sp.-F0441
67.5233	0.0552178	0.0276232	1.99897	0.0456121	0.293678	r__Bacteria	p__Actinobacteria	c__Actinobacteria	o__Actinomycetales	f__Actinomycetaceae	g__Actinomyces	s__Actinomyces-sp.-oral-taxon-175
13358.2	0.143362	0.0719462	1.99263	0.0463024	0.29553	r__Bacteria	p__Actinobacteria	c__Actinobacteria	o__Bifidobacteriales	f__Bifidobacteriaceae	g__Bifidobacterium	s__Bifidobacterium-adolescentis
84.4535	0.0674839	0.0345221	1.9548	0.0506063	0.320216	r__Bacteria	p__Firmicutes	c__Bacilli	o__Lactobacillales	f__Carnobacteriaceae	g__Carnobacterium	s__Carnobacterium-maltaromaticum
7896.5	0.0445271	0.0229844	1.93727	0.0527118	0.330687	r__Bacteria	p__Firmicutes	c__Clostridia	o__Clostridiales	f__Ruminococcaceae	g__Ruminococcus	s__Ruminococcus-obeum
23.3758	0.0656004	0.0341993	1.91818	0.0550881	0.342666	r__Bacteria	p__Firmicutes	c__Bacilli	o__Lactobacillales	f__Lactobacillaceae	g__Lactobacillus	s__Lactobacillus-amylovorus
607.684	0.0416423	0.0217974	1.91043	0.0560781	0.345894	r__Bacteria	p__Firmicutes	c__Erysipelotrichia	o__Erysipelotrichales	f__Erysipelotrichaceae	g__Coprobacillus	s__Coprobacillus-sp.-29_1
44.3559	0.0773347	0.0405819	1.90565	0.0566963	0.346792	r__Bacteria	p__Firmicutes	c__Bacilli	o__Lactobacillales	f__Carnobacteriaceae	g__Granulicatella	s__Granulicatella-adiacens
19.6151	-0.038829	0.020447	-1.89901	0.0575634	0.348518	r__Bacteria	p__Proteobacteria	c__Betaproteobacteria	o__Rhodocyclales	f__Rhodocyclaceae	g__Azospira	s__Azospira-oryzae
15.5476	0.0401126	0.0211537	1.89624	0.0579281	0.348518	r__Bacteria	p__Firmicutes	c__Clostridia	o__Halanaerobiales	f__Halobacteroidaceae	g__Halobacteroides	s__Halobacteroides-halobius
19.4173	0.0359806	0.0190308	1.89065	0.0586714	0.35012	r__Bacteria	p__Firmicutes	c__Clostridia	o__Clostridiales	f__Peptoniphilaceae	g__Helcococcus	s__Helcococcus-kunzii
25.9386	0.115779	0.0615288	1.8817	0.0598773	0.352492	r__Bacteria	p__Firmicutes	c__Bacilli	o__Lactobacillales	f__Streptococcaceae	g__Streptococcus	s__Streptococcus-sp.-C300
26.3051	-0.0514363	0.0273832	-1.87839	0.0603281	0.352492	r__Bacteria	p__Bacteroidetes	c__Flavobacteriia	o__Flavobacteriales	f__Flavobacteriaceae	g__Chryseobacterium	s__Chryseobacterium-gleum
136.757	0.0280273	0.014951	1.8746	0.0608474	0.352492	r__Bacteria	p__Firmicutes	c__Clostridia	o__Clostridiales	f__Peptostreptococcaceae	g__Peptoclostridium	s__[Clostridium]-hiranonis
57.3826	0.0197035	0.0105174	1.87343	0.0610096	0.352492	r__Bacteria	p__Firmicutes	c__Clostridia	o__Clostridiales	f__Peptococcaceae	g__Desulfosporosinus	s__Desulfosporosinus-orientis
30.8404	0.0312013	0.0166843	1.8701	0.06147	0.352492	r__Bacteria	p__Fusobacteria	c__Fusobacteriia	o__Fusobacteriales	f__Fusobacteriaceae	g__Fusobacterium	s__Fusobacterium-periodonticum
23.0838	0.0561123	0.0301325	1.86218	0.0625772	0.356059	r__Bacteria	p__Firmicutes	c__Erysipelotrichia	o__Erysipelotrichales	f__Erysipelotrichaceae	g__Erysipelothrix	s__Erysipelothrix-rhusiopathiae
2158.92	-0.082749	0.0445256	-1.85846	0.0631036	0.356293	r__Bacteria	p__Bacteroidetes	c__Flavobacteriia	o__Flavobacteriales	f__Flavobacteriaceae	g__Capnocytophaga	s__Capnocytophaga-sp.
525.886	0.0801343	0.043235	1.85346	0.0638164	0.357567	r__Bacteria	p__Actinobacteria	c__Actinobacteria	o__Actinomycetales	f__Actinomycetaceae	g__Actinomyces	s__Actinomyces-odontolyticus
26.6009	-0.0340146	0.0184108	-1.84753	0.0646698	0.359603	r__Bacteria	p__Bacteroidetes	c__Bacteroidetes_n	o__Bacteroidetes-Order-II.-Incertae-sedis	f__Rhodothermaceae	g__Rhodothermus	s__Rhodothermus-marinus
234.269	-0.100455	0.0547775	-1.83387	0.0666726	0.367429	r__Bacteria	p__Proteobacteria	c__Betaproteobacteria	o__Burkholderiales	f__Sutterellaceae	g__Sutterella	s__Sutterella-parvirubra
48.122	0.0498594	0.0272285	1.83115	0.0670784	0.367429	r__Bacteria	p__Actinobacteria	c__Actinobacteria	o__Actinomycetales	f__Actinomycetaceae	g__Actinomyces	s__Actinomyces-sp.-oral-taxon-178
25.0961	0.0784022	0.0428987	1.82761	0.0676078	0.367586	r__Bacteria	p__Firmicutes	c__Bacilli	o__Lactobacillales	f__Streptococcaceae	g__Streptococcus	s__Streptococcus-pneumoniae
55.1995	0.0253157	0.0139196	1.8187	0.0689568	0.372164	r__Bacteria	p__Firmicutes	c__Clostridia	o__Clostridiales	f__Clostridiaceae	g__Clostridium	s__Clostridium-pasteurianum
31.5371	-0.0793984	0.0442773	-1.79321	0.0729393	0.390784	r__Bacteria	p__Proteobacteria	c__Betaproteobacteria	o__Burkholderiales	f__Burkholderiales_n	g__Burkholderiales_n_n	s__Burkholderiales-bacterium-1_1_47
20.5592	0.0385138	0.0216287	1.78068	0.074965	0.398727	r__Bacteria	p__Firmicutes	c__Bacilli	o__Bacillales	f__Bacillaceae	g__Bacillus	s__Bacillus-smithii
322.515	0.085214	0.0480998	1.77161	0.0764598	0.403657	r__Bacteria	p__Firmicutes	c__Bacilli	o__Lactobacillales	f__Streptococcaceae	g__Streptococcus	s__Streptococcus-sanguinis
25.8334	0.108559	0.0613875	1.76841	0.0769918	0.403657	r__Bacteria	p__Firmicutes	c__Bacilli	o__Lactobacillales	f__Streptococcaceae	g__Streptococcus	s__Streptococcus-peroris
22.1955	0.0312101	0.017804	1.75298	0.0796049	0.414397	r__Bacteria	p__Firmicutes	c__Clostridia	o__Clostridiales	f__Peptoniphilaceae	g__Peptoniphilus	s__Peptoniphilus-lacrimalis
36.9265	0.0288562	0.0165051	1.74832	0.0804087	0.415634	r__Bacteria	p__Firmicutes	c__Clostridia	o__Clostridiales	f__Peptostreptococcaceae	g__Peptostreptococcaceae_n	s__Peptostreptococcaceae-bacterium-CM2
960.694	0.0369858	0.0211967	1.74488	0.0810051	0.415788	r__Bacteria	p__Firmicutes	c__Clostridia	o__Clostridiales	f__Lachnospiraceae	g__Blautia	s__Blautia-hydrogenotrophica
15.1553	-0.0276072	0.0159199	-1.73413	0.0828948	0.422533	r__Bacteria	p__Proteobacteria	c__Betaproteobacteria	o__Burkholderiales	f__Burkholderiaceae	g__Burkholderia	s__Burkholderia-multivorans
23.5855	-0.0383676	0.0223778	-1.71454	0.0864299	0.432468	r__Bacteria	p__Proteobacteria	c__Gammaproteobacteria	o__Pseudomonadales	f__Pseudomonadaceae	g__Pseudomonas	s__Pseudomonas-aeruginosa
82.1312	0.0722464	0.0421519	1.71395	0.0865375	0.432468	r__Bacteria	p__Firmicutes	c__Bacilli	o__Lactobacillales	f__Streptococcaceae	g__Streptococcus	s__Streptococcus-oralis
1701.93	0.0160943	0.00940238	1.71172	0.0869475	0.432468	r__Bacteria	p__Firmicutes	c__Clostridia	o__Clostridiales	f__Lachnospiraceae	g__Lachnoclostridium	s__[Clostridium]-asparagiforme
19.8128	0.0335569	0.0196199	1.71035	0.0872007	0.432468	r__Bacteria	p__Actinobacteria	c__Actinobacteria	o__Bifidobacteriales	f__Bifidobacteriaceae	g__Scardovia	s__Scardovia-wiggsiae
18.2504	0.0877685	0.0519985	1.6879	0.0914298	0.450399	r__Bacteria	p__Firmicutes	c__Bacilli	o__Lactobacillales	f__Streptococcaceae	g__Streptococcus	s__Streptococcus-sp.-oral-taxon-058
29.4368	-0.0226008	0.0134298	-1.68289	0.0923972	0.45213	r__Bacteria	p__Proteobacteria	c__Alphaproteobacteria	o__Rhizobiales	f__Methylobacteriaceae	g__Methylobacterium	s__Methylobacterium-extorquens
1183.36	0.038477	0.0229823	1.6742	0.0940907	0.457368	r__Bacteria	p__Firmicutes	c__Clostridia	o__Clostridiales	f__Lachnospiraceae	g__Lachnospiraceae_n	s__Lachnospiraceae-bacterium-6_1_63FAA
16.692	0.0254912	0.0152998	1.66611	0.0956914	0.462089	r__Bacteria	p__Firmicutes	c__Bacilli	o__Bacillales	f__Paenibacillaceae	g__Brevibacillus	s__Brevibacillus-brevis
17.9945	0.0618112	0.0376065	1.64363	0.100252	0.47959	r__Bacteria	p__Firmicutes	c__Bacilli	o__Lactobacillales	f__Lactobacillaceae	g__Lactobacillus	s__Lactobacillus-reuteri
22.1478	0.0304077	0.0185347	1.64058	0.100885	0.47959	r__Bacteria	p__Firmicutes	c__Clostridia	o__Thermoanaerobacterales	f__Thermoanaerobacteraceae	g__Thermoanaerobacter	s__Thermoanaerobacter-wiegelii
276.854	0.0352299	0.0215712	1.63319	0.102429	0.47959	r__Bacteria	p__Firmicutes	c__Clostridia	o__Clostridiales	f__Clostridiales-Family-XIII.-Incertae-Sedis	g__Clostridiales-Family-XIII.-Incertae-Sedis_n	s__[Eubacterium]-infirmum
26.6956	-0.0620934	0.0381034	-1.6296	0.103186	0.47959	r__Bacteria	p__Bacteroidetes	c__Bacteroidia	o__Bacteroidales	f__Bacteroidaceae	g__Bacteroides	s__Bacteroides-sp.-3_2_5
28.6281	0.0716755	0.0440377	1.62759	0.103611	0.47959	r__Bacteria	p__Proteobacteria	c__Epsilonproteobacteria	o__Campylobacterales	f__Helicobacteraceae	g__Helicobacter	s__Helicobacter-bilis
135.311	0.0282994	0.017394	1.62696	0.103745	0.47959	r__Bacteria	p__Firmicutes	c__Clostridia	o__Clostridiales	f__Lachnospiraceae	g__Oribacterium	s__Oribacterium-sinus
32.4287	0.0579604	0.0356398	1.62628	0.103889	0.47959	r__Bacteria	p__Firmicutes	c__Bacilli	o__Lactobacillales	f__Streptococcaceae	g__Streptococcus	s__Streptococcus-suis
31.4798	0.0271776	0.0169107	1.60712	0.108027	0.494327	r__Bacteria	p__Fusobacteria	c__Fusobacteriia	o__Fusobacteriales	f__Leptotrichiaceae	g__Sebaldella	s__Sebaldella-termitidis
533.742	0.0322329	0.0200791	1.6053	0.108429	0.494327	r__Bacteria	p__Firmicutes	c__Clostridia	o__Clostridiales	f__Lachnospiraceae	g__Lachnospiraceae_n	s__Lachnospiraceae-bacterium-9_1_43BFAA
48.6046	0.0336937	0.0211117	1.59597	0.110495	0.500613	r__Bacteria	p__Firmicutes	c__Clostridia	o__Clostridiales	f__Clostridiaceae	g__Clostridium	s__Clostridium-tetani
29.8808	0.0579136	0.0364259	1.5899	0.111857	0.500613	r__Bacteria	p__Firmicutes	c__Bacilli	o__Bacillales	f__Bacillales_n	g__Gemella	s__Gemella-sanguinis
1919.76	-0.095438	0.0600466	-1.5894	0.111971	0.500613	r__Bacteria	p__Firmicutes	c__Negativicutes	o__Selenomonadales	f__Veillonellaceae	g__Dialister	s__Dialister-succinatiphilus
29.8033	0.044021	0.0277741	1.58496	0.112975	0.500613	r__Bacteria	p__Actinobacteria	c__Actinobacteria	o__Corynebacteriales	f__Corynebacteriaceae	g__Corynebacterium	s__Corynebacterium-efficiens
34.9971	0.0576316	0.036386	1.58389	0.113218	0.500613	r__Bacteria	p__Firmicutes	c__Erysipelotrichia	o__Erysipelotrichales	f__Erysipelotrichaceae	g__Erysipelatoclostridium	s__Erysipelatoclostridium-ramosum
87.8052	0.0245549	0.0155535	1.57874	0.114396	0.502795	r__Bacteria	p__Firmicutes	c__Negativicutes	o__Selenomonadales	f__Veillonellaceae	g__Selenomonas	s__Selenomonas-sp.-oral-taxon-149
32.0357	0.0655082	0.041758	1.56876	0.116705	0.509839	r__Bacteria	p__Firmicutes	c__Bacilli	o__Lactobacillales	f__Streptococcaceae	g__Streptococcus	s__Streptococcus-gallolyticus
24.4507	0.0433101	0.0277047	1.56328	0.117987	0.509839	r__Bacteria	p__Firmicutes	c__Bacilli	o__Lactobacillales	f__Lactobacillaceae	g__Lactobacillus	s__Lactobacillus-salivarius
42.8681	0.0550707	0.0352368	1.56287	0.118083	0.509839	r__Bacteria	p__Actinobacteria	c__Actinobacteria	o__Actinomycetales	f__Actinomycetaceae	g__Actinomyces	s__Actinomyces-sp.-oral-taxon-448
38.9764	0.0387795	0.0248803	1.55864	0.119081	0.511141	r__Bacteria	p__Firmicutes	c__Erysipelotrichia	o__Erysipelotrichales	f__Erysipelotrichaceae	g__Bulleidia	s__Bulleidia-extructa
16.2378	0.0261424	0.0168205	1.5542	0.120137	0.51268	r__Bacteria	p__Proteobacteria	c__Betaproteobacteria	o__Burkholderiales	f__Burkholderiaceae	g__Burkholderia	s__Burkholderia-sp.-YI23
64.5659	0.0727956	0.0471419	1.54418	0.122544	0.519928	r__Bacteria	p__Actinobacteria	c__Actinobacteria	o__Bifidobacteriales	f__Bifidobacteriaceae	g__Gardnerella	s__Gardnerella-vaginalis
24.5783	0.0367285	0.0238374	1.54079	0.123368	0.520057	r__Bacteria	p__Firmicutes	c__Negativicutes	o__Selenomonadales	f__Veillonellaceae	g__Megasphaera	s__Megasphaera-sp.-UPII-199-6
77.0011	0.0558272	0.0362931	1.53823	0.123992	0.520057	r__Bacteria	p__Tenericutes	c__Mollicutes	o__Mollicutes_n	f__Mollicutes_n_n	g__Mollicutes_n_n_n	s__Mollicutes-bacterium
117.509	0.0142484	0.00928272	1.53494	0.124799	0.520467	r__Bacteria	p__Firmicutes	c__Bacilli	o__Bacillales	f__Paenibacillaceae	g__Paenibacillus	s__Paenibacillus-sp.-oral-taxon-786
15.6461	0.0322276	0.0210478	1.53117	0.125729	0.521383	r__Bacteria	p__Firmicutes	c__Clostridia	o__Clostridiales	f__Peptoniphilaceae	g__Parvimonas	s__Parvimonas-sp.-oral-taxon-393
46.2205	0.0387192	0.0255055	1.51808	0.128995	0.52934	r__Bacteria	p__Firmicutes	c__Clostridia	o__Clostridiales	f__Clostridiales_n	g__Gottschalkia	s__Gottschalkia-acidurici
945.17	0.0332347	0.0219136	1.51662	0.129362	0.52934	r__Bacteria	p__Firmicutes	c__Clostridia	o__Clostridiales	f__Lachnospiraceae	g__Lachnospiraceae_n	s__Lachnospiraceae-bacterium-5_1_57FAA
[truncated: 1,145 more rows]

## Sheet: Table S3
Table S3. DESeq2 results for the bacterial taxa associated with the WISCONSIN CARD SORTING TEST (WCST) adjusting for age, sex and years of education in cohort 2 (n=24)
[truncated: 1,326 more rows]

[truncated: 15 more sheets: Table S4, Table S5, Table S6, Table S7, Table S8, Table S9, Table S10, Table S11, Table S12, Table S13, Table S14, Table S15, Table S16, Table S17, Table S18]
